# Supplementary material for: A one-pot hypoiodite catalysed oxidative cycloetherification approach to benzoxazoles
Source: Royal Society of Chemistry journal article supplement (doi:10.1039/c4cc02425g), 2014-01-01

## Supporting Information

For

# A one-pot Hypoiodite catalysed oxidative cycloetherification approach to benoxazoles

Siva Senthil Kumar Boominathan,<sup>a</sup> Wan-Ping Hu,<sup>b</sup> Gopal Chandru Senadi,<sup>a</sup> Jaya  
Kishore Vandavasi,<sup>a</sup> Jeh-Jeng Wang <sup>\*a</sup>

<sup>a</sup> Department of medicinal and applied chemistry, Kaohsiung Medical University, Kaohsiung, Taiwan.

<sup>b</sup> Department of Biotechnology, Kaohsiung Medical University, Kaohsiung, Taiwan.

*Email: jjwang@kmu.edu.tw*

| <b>S.No</b> | <b>Table of Contents</b>                                 | <b>Page No</b> |
|-------------|----------------------------------------------------------|----------------|
| 1.          | General Information                                      | 2              |
| 2.          | General Experimental Procedure                           | 3-5            |
| 3.          | Analytical Data                                          |                |
|             | i) For Products                                          | 6-10           |
|             | ii) Isolated Intermediates                               | 11             |
|             | iii) For Starting Materials                              | 11-16          |
| 4.          | References                                               | 16             |
| 5.          | Copy of <sup>1</sup> H and <sup>13</sup> C spectral data | 17-109         |
| 6.          | Crystallographic data                                    | 110-111        |

## General information:

All chemicals were purchased from best grade in commercially available and are used without further purification. All solvents were purchased as HPLC grade and used without any purification or distillation. Analytical thin layer chromatography was performed on aluminium plate coated with silica gel (Merck). Gravity column chromatography was performed using 100-200 mesh silica gel and mixtures of hexane-ethyl acetate were used for elution. Visualization was accomplished using ultraviolet light (254 nm) and chemical staining with acidic potassium permanganate solution and Iodine.

Melting points were determined using “Mel-Temp” melting point apparatus and were uncorrected. Proton nuclear magnetic resonance ( $^1\text{H}$  NMR) and Carbon nuclear magnetic resonance ( $^{13}\text{C}$  NMR) spectra's were recorded using a Varian (400 MHz) or a JEOL (200 MHz) spectrometer. All spectra were recorded at ambient temperature (298 K). Chemical shifts ( $\delta$ ) are quoted in ppm relative to residual solvent ( $\text{CHCl}_3$ :  $\delta = 7.26$  ppm for  $^1\text{H}$  and  $\delta = 77.0$  for  $^{13}\text{C}$ ;  $(\text{CD}_3)_2\text{SO}$ :  $\delta = 2.50$  ppm for  $^1\text{H}$ ). Coupling constants ( $J$ ) are corrected and quoted to the nearest 0.1 Hz. The following abbreviations are used to indicate the multiplicity of the signals: s = singlet; d = doublet; t = triplet; q = quartet; m = multiplet; bs = broad singlet; dt = doublet of triplet; td = triplet of doublet. High resolution mass spectra (HRMS) were measured on a Micromass Q-TOF spectrometer using EI (electron impact, 70 eV) at the Joint Center for High valued Instruments, NSYS University, Kaohsiung, Taiwan.

### Typical experimental procedure for $\alpha$ - bromination of ketone derivatives: <sup>1</sup>

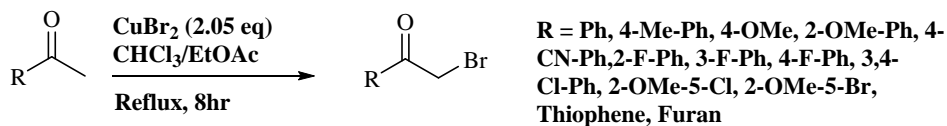

To a solution of Acetophenone (1 mmol) in EtOAc/CHCl<sub>3</sub> (5/5 ml) was added with copper (II) bromide (2.05 mmol) and refluxed for 8 hr. After reaction completed (monitored by TLC), solvent was evaporated and the resulted residue was partitioned between water and EtOAc. The combined organic layer was washed with sat. Na<sub>2</sub>S<sub>2</sub>O<sub>3</sub> and brine solution, dried and evaporated under vacuo. The obtained crude material was purified by flash column chromatography yielded the pure product (85%, off- white low melting solid).

### General experiment procedure for synthesis of starting materials: (1a to 1w)

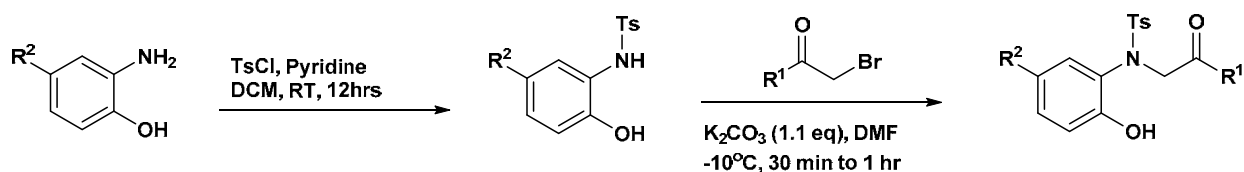

To a solution of 2-amino phenol (2mmol) in Dichloromethane (20 ml) was added with pyridine (3 equiv) followed by tosyl chloride (1.3 eq) at 0°C over a period of 10 min. After addition completes, reaction stirred at room temperature (~28°C) for 12 hours. After reaction completed (monitored by TLC), reaction mass quenched with ice-cold water and extracted into Dichloromethane. The combined organic layer was washed with 1N HCl and brine solution, and dried and evaporated to give crude residue. The obtained crude material passed through flash column chromatography to give pure product as brown solid (88% yield).

The N-tosyl-2-amino phenol (1 mmol) and potassium carbonate (1.1 equiv) in DMF (5 ml) was charged in a RB flask at -10°C (Ice-salt mixture) and stirred at same temperature for 30 min. After phenacyl bromide (1.05 equiv) in DMF (2 ml) was added drop wise over a period of 15 min and the reaction was stirred at same temperature till completion (~30-60 min). After reaction completed (monitored by TLC), reaction mass quenched with ice-cold water and extracted into EtOAc. The combined organic layer was washed with ice-cold water, sat. NH<sub>4</sub>Cl and brine solution, and dried and evaporated to give the crude residue. The crude material was triturated with EtOAc/Hexane to afford the pure compound **1a** as a white solid (63% yield).

**[Note for N-Alkylation: i)** The moderate yield in this alkylation step is due to the less competitive O-Alkylation reaction with phenolic OH. **ii)** The crystallization (or trituration) technique is preferred method for purification of **1a-1u** rather than column chromatography, since the compounds are sparingly soluble in EtOAc.]

### **General Experimental procedure for $\alpha$ -keto benzoxazoles (2a-2u):**

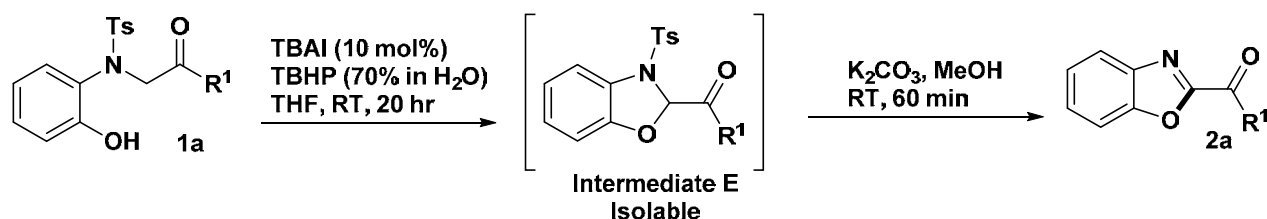

To a solution of **1a** (380 mg, 1 mmol) in THF (5 ml) was added with TBAI (37 mg, 10 mol %) and TBHP (180 mg, 2equiv, 70% aqueous solution) and stirred at RT for 20 hours. After first step was completed (monitored by TLC), potassium carbonate (138 mg, 1 equiv) and MeOH (2 ml) was added and stirred at RT for further 60 min. After reaction completed, reaction mass evaporated to remove the solvent and the crude was passed through the flash column chromatography to afford the title compound as white solid (210 mg, 94%).

### **Experimental procedure for Synthetic Applications:**

#### **1-(benzo[d]oxazol-2-yl)-1-phenylethan-1-ol (3a):**

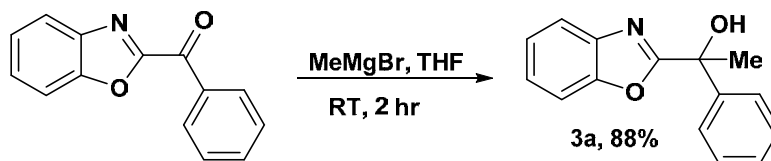

To ketone **2a** (100mg, 0.44 mmol) in THF (3.0 mL) at 0 °C was added MeMgBr (836  $\mu$ L, 0.49 mmol, 0.59 M in THF) drop wise and the mixture was stirred for 2 hours. The reaction mixture was quenched with NH<sub>4</sub>Cl (4 mL, sat. aq.) and extracted into EtOAc. The combined organic layer was separated and the brine solution and concentrated *in vacuo*. The obtained crude passed through Flash column chromatography on silica gel provided the title compound (94 mg, 88%) as a beige solid..

**benzo[d]oxazol-2-yl(phenyl)methanol (3b):**

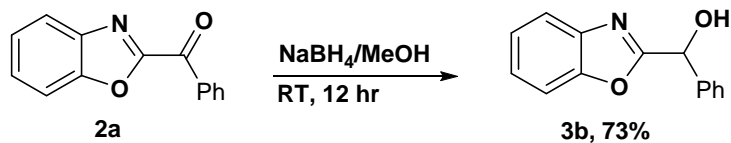

To ketone 2a (100 mg, 0.44 mmol) in MeOH (4 ml) at 0°C was added sodium borohydride (25 mg, 0.66 mmol) over a period of 15 min and stirred at RT for 12 hours. After reaction finished, reaction mass quenched with NH<sub>4</sub>CL solution and extracted into EtOAc. The combined organic layer was washed with brine solution and dried, evaporated under *vacuo*. The resulted crude passed through a Flash column chromatography on silica gel provided the title compound (73 mg, 73%) as pale-yellow solid.

# Analytical data:

## 3.1 For products:

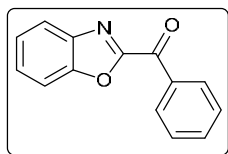

**benzo[d]oxazol-2-yl(phenyl)methanone (2a):**<sup>2</sup> Yield: 94%; white solid; m. p. 65-68 °C; <sup>1</sup>H NMR (400 MHz, CDCl<sub>3</sub>) δ 8.56-8.54 (2H, m), 7.96 (1H, d), 7.72 (1H, d, *J* = 8.4 Hz), 7.69 (1H, dt, *J* = 7.2, 1.2 Hz), 7.60-7.54 (2H, m), 7.48 (1H, td, *J* = 8.0, 0.8 Hz). <sup>13</sup>CNMR (CDCl<sub>3</sub>, 100 MHz): δ 180.5, 157.1, 150.4, 140.4, 135.7, 134.3, 131.3, 131.3, 128.6, 128.4, 125.7, 122.4, 111.8.

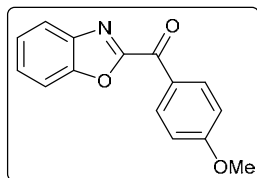

**benzo[d]oxazol-2-yl(4-methoxyphenyl)methanone (2b):**<sup>2</sup> Yield: 92%; white solid; m. p. 78-80 °C; <sup>1</sup>H NMR (400 MHz, CDCl<sub>3</sub>) δ 8.61 (s, *J* = 9.2 Hz, 2H), 7.9-7.92 (m, 1H), 7.71 (dt, *J* = 8.0, 0.8 Hz, 1H), 7.54 (td, *J* = 8.0, 1.1 Hz, 1H), 7.04 (d, *J* = 7.2 Hz, 2H), 3.92 (s, 3H). <sup>13</sup>CNMR (CDCl<sub>3</sub>, 100 MHz): δ 178.7 164.6 157.4, 150.3, 140.7, 133.5, 128.1 127.9, 125.5, 122.5, 113.9 111.9, 55.5.

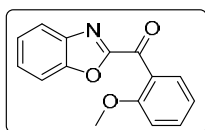

**benzo[d]oxazol-2-yl(2-methoxyphenyl)methanone (2c):**<sup>3</sup> Yield: 88%; white solid; m. p. 74-76 °C; <sup>1</sup>H NMR (400 MHz, CDCl<sub>3</sub>) δ 7.88 (tt, *J* = 8.0, 0.8 Hz, 1H), 7.75 (dd, *J* = 7.6 Hz, 1H), 7.68-7.65 (m, 1H), 7.60-7.55 (m, 1H), 7.54-7.50 (m, 1H), 7.46-7.41 (m, 1H), 7.11 (td, *J* = 7.8, 0.8 Hz, 1H), 7.05 (d, *J* = 8.4 Hz, 1H), 3.77 (s, 3H). <sup>13</sup>CNMR (CDCl<sub>3</sub>, 100 MHz): δ 159.0, 158.4, 150.5, 134.3, 130.9, 128.0, 125.4, 122.2, 120.6, 112.0, 111.7, 55.9.

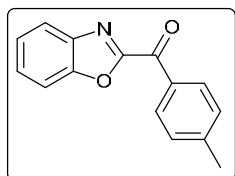

**benzo[d]oxazol-2-yl(p-tolyl)methanone (2d):** Yield: 91%; white solid; m. p. 80-82 °C; <sup>1</sup>H NMR (400 MHz, CDCl<sub>3</sub>) δ 8.46 (d, *J* = 8.0 Hz, 2H), 7.96-7.93 (m, 1H), 7.73-7.70 (m, 1H), 7.55 (td, *J* = 7.2, 1.2 Hz, 1H), 7.47 (td, *J* = 8.4, 1.6 Hz, 1H), 7.37 (d, *J* = 8.0 Hz, 2H), 2.47 (s, 3H). <sup>13</sup>CNMR (CDCl<sub>3</sub>, 100 MHz): δ 180.1, 157.2, 150.3, 145.5, 131.1, 129.3, 128.2, 125.6, 122.3, 111.8, 26.6. HRMS-ESI (m/z): calcd for C<sub>15</sub>H<sub>11</sub>NNaO<sub>2</sub> [M + Na]<sup>+</sup>: 260.0687, found 260.0685.

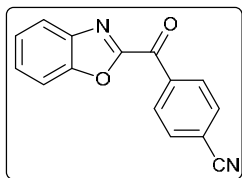

**4-(benzof[1,2-d]oxazol-2-yl)benzotrile (2e)**: Yield: 87%; beige solid; m. p. 132-134°C; <sup>1</sup>H NMR (400 MHz, CDCl<sub>3</sub>) δ 8.70 (d, *J* = 8.8, 2H), 7.96 (d, *J* = 8.0, 1H), 7.87 (d, *J* = 8.8 Hz, 2H), 7.74 (d, *J* = 8.4, 1H), 7.60 (td, *J* = 7.2, 1.2 Hz, 1H), 7.51 (td, *J* = 8.0, 1.2 Hz, 1H). <sup>13</sup>CNMR (CDCl<sub>3</sub>, 100 MHz): δ 178.93, 156.43, 150.48, 137.98, 137.98, 132.28, 131.37, 129.1, 126.1, 122.58, 117.2, 111.9. HRMS-ESI (m/z): calcd for C<sub>15</sub>H<sub>8</sub>N<sub>2</sub>NaO<sub>2</sub> [M + Na]<sup>+</sup>: 271.0483, found 271.0477.

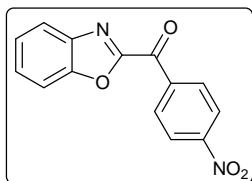

**benzof[1,2-d]oxazol-2-yl(4-nitrophenyl)methanone (2f)**:<sup>5</sup> Yield: 90%; pale-yellow solid; <sup>1</sup>H NMR (400 MHz, CDCl<sub>3</sub>) δ 8.78 (d, *J* = 9.2 Hz, 2H), 8.42 (d, *J* = 9.2 Hz, 2H), 7.99-7.97 (m, 1H), 7.76-7.73 (m, 1H), 7.63-7.73 (m, 1H), 7.63-7.59 (m, 1H), 7.54-7.50 (m, 1H). <sup>13</sup>CNMR (CDCl<sub>3</sub>, 100 MHz): δ 178.76, 156.47, 150.55, 140.64, 139.49, 132.13, 129.21, 126.18, 123.63, 122.66, 112.00. HRMS-ESI (m/z): calcd for C<sub>14</sub>H<sub>8</sub>N<sub>2</sub>NaO<sub>4</sub> [M + Na]<sup>+</sup>: 291.0382, found 291.03786.

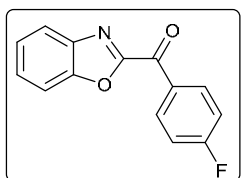

**benzof[1,2-d]oxazol-2-yl(4-fluorophenyl)methanone (2g)**:<sup>2</sup> Yield: 90%; white solid; m. p. 108-110°C; <sup>1</sup>H NMR (400 MHz, CDCl<sub>3</sub>) δ 8.69-8.64 (2H, m), 7.96-7.94 (m, 1H), 7.73-7.71 (m, 1H), 7.57 (dt, *J* = 7.6, 1.2 Hz, 1H), 7.49 (dt, *J* = 8.4, 1.2 Hz, 1H), 7.28-7.22 (m, 2H). <sup>13</sup>CNMR (CDCl<sub>3</sub>, 100 MHz): δ 178.7, 167.8, 165.3, 140.6, 133.96 (*J*<sub>F</sub> = 9.8 Hz), 131.34 (*J*<sub>F</sub> = 3.1 Hz), 128.5, 125.8, 122.3, 115.9 (*J*<sub>F</sub> = 22 Hz), 111.88. HRMS-ESI (m/z): calcd for C<sub>14</sub>H<sub>8</sub>FNNaO<sub>2</sub> [M + Na]<sup>+</sup>: 264.0437, found 264.0433.

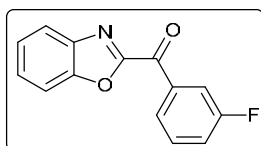

**benzof[1,2-d]oxazol-2-yl(3-fluorophenyl)methanone (2h)**: Yield: 86%; off-white solid; m. p. 80-82°C; <sup>1</sup>H NMR (400 MHz, CDCl<sub>3</sub>) δ 8.41 (dt, *J* = 8.0, 1.2 Hz, 1H), 8.33-8.29 (m, 1H), 7.97-7.95 (m, 1H), 7.74-7.17 (m, 1H), 7.60-7.53 (m, 2H), 7.50 (td, *J* = 7.2, 1.2 Hz, 1H), 7.42-7.37 (m, 1H). <sup>13</sup>CNMR (CDCl<sub>3</sub>, 100 MHz): δ 179.07 (*J*<sub>F</sub> = 3.0 Hz), 163.7, 156.6, 150.4, 140.6, 136.7 (*J*<sub>F</sub> = 6.8 Hz), 130.2 (*J*<sub>F</sub> = 7.5 Hz), 128.7, 126.8 (*J*<sub>F</sub> = 3.0 Hz), 125.8, 122.4, 121.3 (*J*<sub>F</sub> = 22 Hz), 117.7 (*J*<sub>F</sub> = 22.7), 111.8. HRMS-ESI (m/z): calcd for C<sub>14</sub>H<sub>8</sub>FNNaO<sub>2</sub> [M + Na]<sup>+</sup>: 264.0437, found 264.0433.

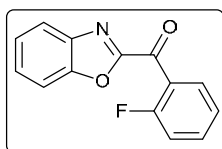

**benzof[1,2-d]oxazol-2-yl(2-fluorophenyl)methanone(2i)**: Yield: 92%; beige solid; m. p. 88-90°C; <sup>1</sup>H NMR (400 MHz, CDCl<sub>3</sub>) δ 8.01 (td, *J* = 7.2, 1.6 Hz, 1H), 7.92 (d, *J* = 8.0 Hz, 1H), 7.70 (d, *J* = 8.4 Hz, 1H), 7.66-7.61 (m, 1H), 7.56 (td, *J* = 8.0, 1.22 Hz, 1H), 7.34 (td, *J* = 7.6, 0.8 Hz, 1H), 7.26-7.21 (m, 1H). <sup>13</sup>CNMR (CDCl<sub>3</sub>, 100 MHz): δ 179.7, 162.5, 160.0, 157.2, 150.6, 140.7, 135.0 (*J*<sub>F</sub> = 9.1 Hz), 131.74 (*J*<sub>F</sub> = 1.5 Hz), 128.6,

125.6, 125.8, 124.2 ( $J_F = 3.8$  Hz), 116.7 ( $J_F = 21.1$  Hz), 111.8. HRMS-ESI (m/z): calcd for  $C_{14}H_8FNNaO_2$  [M + Na]<sup>+</sup>: 264.0437, found 264.0433.

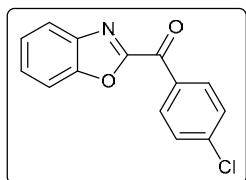

**benzo[d]oxazol-2-yl(4-chlorophenyl)methanone (2j):**<sup>4</sup> Yield: 86%; beige solid; m. p. 88-90°C; <sup>1</sup>H NMR (400 MHz, CDCl<sub>3</sub>) δ 8.58-8.54 (m, 2H), 7.96-7.94 (m, 1H), 7.72 (dt,  $J = 8.0, 0.8$  Hz, 1H), 7.59-7.54 (m, 3H), 7.49 (td,  $J = 8.4, 1.2$  Hz, 1H). <sup>13</sup>CNMR (CDCl<sub>3</sub>, 100 MHz): δ 179.1, 156.8, 150.3, 141.0,

140.6, 133.2, 132.4, 128.9, 128.6, 125.8, 122.4, 111.8. HRMS-ESI (m/z): calcd for  $C_{14}H_8ClNNaO_2$  [M + Na]<sup>+</sup>: 280.0141, found xxx.

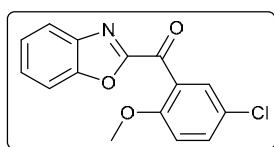

**benzo[d]oxazol-2-yl(5-chloro-2-methoxyphenyl)methanone (2k):** Yield:

82%; white crystalline solid; m. p. 138-141°C; <sup>1</sup>H NMR (400 MHz, CDCl<sub>3</sub>) δ 7.90-7.88 (m, 1H), 7.69-7.66 (m, 2H), 7.56-7.50 (m, 2H), 7.45 (td,  $J = 7.2, 1.2$  Hz, 1H), 6.99 (d,  $J = 8.8$  Hz, 1H), 3.76 (s, 3H). <sup>13</sup>CNMR (CDCl<sub>3</sub>, 100 MHz): δ 181.7, 157.8, 157.4, 150.6, 140.7, 133.7, 130.3, 128.3, 127.4, 125.8, 125.6, 122.3, 113.4, 111.8, 56.3. HRMS-ESI (m/z): calcd for  $C_{15}H_{10}ClNNaO_3$  [M + Na]<sup>+</sup>: 310.0247, found 310.0241.

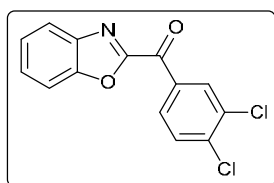

**benzo[d]oxazol-2-yl(3,4-dichlorophenyl)methanone (2l):** Yield: 92%;

white solid; m. p. 112-114°C; <sup>1</sup>H NMR (400 MHz, CDCl<sub>3</sub>) δ 8.74 (d,  $J = 2.0$  Hz), 8.49 (dd,  $J = 8.4, 2.0$  Hz, 1H), 7.97 (dd,  $J = 8.0, 0.8$  Hz, 1H), 7.72 (d,  $J = 8.4$  Hz, 1H), 7.72 (d,  $J = 8.4$  Hz, 1H), 7.66 (d,  $J = 8.4$  Hz, 1H), 7.58 (td,  $J = 7.6, 1.2$  Hz, 1H), 7.50 (td,  $J = 8.4, 1.2$  Hz, 1H). <sup>13</sup>CNMR (CDCl<sub>3</sub>, 100 MHz): δ 177.9, 156.4, 150.4, 140.5, 139.1, 134.3, 133.3, 132.8, 130.7, 130.0, 128.9, 125.9, 122.5, 111.9. HRMS-ESI (m/z): calcd for  $C_{14}H_7Cl_2NNaO_2$  [M + Na]<sup>+</sup>: 313.9752, found 313.9346.

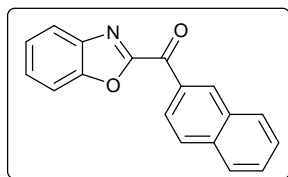

**benzo[d]oxazol-2-yl(naphthalen-2-yl)methanone (2m):** Yield: 86%; off-

white solid; m. p. 110-112°C; <sup>1</sup>H NMR (400 MHz, CDCl<sub>3</sub>) δ 9.32 (s, 1H), 8.44 (dd,  $J = 8.8, 1.6$  Hz, 1H), 8.08 (d,  $J = 8.0$  Hz, 1H), 7.98 (t,  $J = 8.0$  Hz, 1H), 7.91 (d,  $J = 8.4$  Hz, 1H), 7.73 (d,  $J = 8.0$  Hz, 1H), 7.65 (td,  $J = 6.8, 1.2$  Hz, 1H), 7.60-7.54 (m, 2H), 7.49 (dt,  $J = 6.8, 1.2$  Hz, 1H). <sup>13</sup>CNMR (CDCl<sub>3</sub>, 100 MHz): δ 180.2, 157.2, 150.4, 136.0, 134.2, 132.3, 132.2, 130.2, 129.2, 128.4, 127.7, 126.8, 125.7, 125.3, 122.3, 111.8. HRMS-ESI (m/z): calcd for  $C_{18}H_{11}NNaO_2$  [M + Na]<sup>+</sup>: 296.0687, found 296.0679.



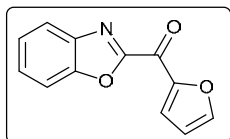

**benzof[d]loxazol-2-yl(furan-2-yl)methanone (2n)**: Yield: 90%; off-white solid; m. p. 116-118°C;  $^1\text{H NMR}$  (400 MHz,  $\text{CDCl}_3$ )  $\delta$  8.30 (dd,  $J = 2.7, 0.8$  Hz, 1H), 7.95-7.92 (m, 1H), 7.85-7.84 (m, 1H), 7.72-7.70 (m, 1H), 7.53 (td,  $J = 7.4, 1.2$  Hz, 1H), 7.48 (td,  $J = 6.8, 2.4$  Hz, 1H), 6.70 (dd,  $J = 1.6$  Hz, 1H).  $^{13}\text{CNMR}$  ( $\text{CDCl}_3$ , 100 MHz):  $\delta$  167.1, 156.5, 149.3, 140.6, 128.3, 125.8, 124.9, 122.2, 113.0, 111.8. HRMS-ESI (m/z): calcd for  $\text{C}_{12}\text{H}_7\text{NNaO}_3$  [ $\text{M}+\text{Na}$ ] $^+$ : 236.0324, found 236.0316.

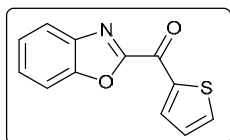

**benzof[d]loxazol-2-yl(thiophen-2-yl)methanone (2o)**: Yield: 82%; white solid; m. p. 105-107°C;  $^1\text{H NMR}$  (400 MHz,  $\text{CDCl}_3$ )  $\delta$  8.75 (dd,  $J = 7.6, 0.8$  Hz, 1H), 7.96-7.94 (m, 1H), 7.86 (dd,  $J = 4.8, 1.2$  Hz, 1H), 7.72 (d,  $J = 8.0$  Hz, 1H), 7.55 (td,  $J = 7.2, 1.2$  Hz, 1H), 7.48 (td,  $J = 8.4, 1.2$  Hz, 1H), 7.29-7.26 (m, 1H).  $^{13}\text{CNMR}$  ( $\text{CDCl}_3$ , 100 MHz):  $\delta$  172.1, 156.8, 150.5, 140.6, 140.5, 137.6, 137.0, 128.7, 128.3, 125.7, 122.2, 111.8. HRMS-ESI (m/z): calcd for  $\text{C}_{12}\text{H}_7\text{NNaO}_2\text{S}$  [ $\text{M}$ ] $^+$ : 252.0095, found 252.00908.

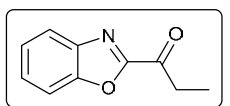

**1-(benzof[d]loxazol-2-yl)propan-1-one (2p)**: Yield: 76%; white solid;  $^1\text{H NMR}$  (400 MHz,  $\text{CDCl}_3$ )  $\delta$  7.91-7.88 (m, 1H), 7.68-7.65 (m, 1H), 7.55-7.51 (m, 1H), 7.48-7.44 (m, 1H), 3.25 (q,  $J = 7.6$  Hz, 2H), 1.30 (t,  $J = 7.2$  Hz, 3H).  $^{13}\text{CNMR}$  ( $\text{CDCl}_3$ , 100 MHz):  $\delta$  128.4, 125.7, 122.2, 111.9, 32.9, 29.6. HRMS-ESI (m/z): calcd for  $\text{C}_{10}\text{H}_9\text{NNaO}_2$  [ $\text{M}$ ] $^+$ : 198.0531, found 198.0523.

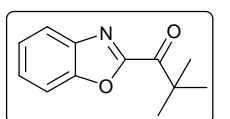

**1-(benzof[d]loxazol-2-yl)-2,2-dimethylpropan-1-one (2q)**: Yield: 92%; white solid; m. p. 78-80°C;  $^1\text{H NMR}$  (400 MHz,  $\text{CDCl}_3$ )  $\delta$  7.89 (m, 1H), 7.65 (m, 1H), 7.53-7.49 (m, 1H), 7.44 (m, 1H), 1.52 (s, 9H).  $^{13}\text{CNMR}$  ( $\text{CDCl}_3$ , 100 MHz):  $\delta$  195.1, 155.6, 149.8, 140.5, 128.1, 125.4, 122.2, 111.7, 44.3, 26.8. HRMS-ESI (m/z): calcd for  $\text{C}_{12}\text{H}_{13}\text{NNaO}_2$  [ $\text{M} + \text{Na}$ ] $^+$ : 226.0844, found 226.0831.

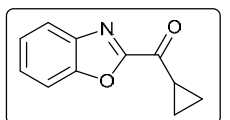

**benzof[d]loxazol-2-yl(cyclopropyl)methanone (2r)**: Yield: 89%; white solid; m. p. 86-88°C;  $^1\text{H NMR}$  (400 MHz,  $\text{CDCl}_3$ )  $\delta$  7.92-7.90 (m, 1H), 7.66 (dt,  $J = 8.0, 0.8$  Hz, 1H), 7.53 (td,  $J = 7.6, 1.6$  Hz, 1H), 7.47 (td,  $J = 7.2, 1.2$  Hz, 1H), 3.29-2.23 (m, 1H), 1.43-1.32 (m, 1H), 1.28-1.22 (m, 1H).  $^{13}\text{CNMR}$  ( $\text{CDCl}_3$ , 100 MHz):  $\delta$  189.8, 157.7, 150.7, 140.6, 128.3, 125.6, 122.1, 111.9, 18.6, 13.5. HRMS-ESI (m/z): calcd for  $\text{C}_{11}\text{H}_9\text{NNaO}_2$  [ $\text{M} + \text{Na}$ ] $^+$ : 210.0531, found 210.0524.

**(5-methylbenzo[d]oxazol-2-yl)(phenyl)methanone (2s)**: Yield: 94%; white solid; m. p. 91-93 °C;

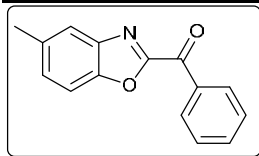

$^1\text{H NMR}$  (400 MHz,  $\text{CDCl}_3$ )  $\delta$  8.55-8.52 (m, 2H), 7.72-7.71 (m, 1H), 7.74 (tt,  $J = 5.1, 1.2$  Hz, 1H), 7.59-7.54 (m, 3H), 7.37-7.35 (m, 1H), 2.52 (s, 3H).

$^{13}\text{CNMR}$  ( $\text{CDCl}_3$ , 100 MHz):  $\delta$  180.6, 157.2, 148.7, 140.9, 135.7, 134.2, 130.9, 129.8, 128.5, 121.9, 111.1, 21.5. HRMS-ESI (m/z): calcd for  $\text{C}_{15}\text{H}_{11}\text{NNaO}_2$  [ $\text{M} + \text{Na}$ ] $^+$ : 260.0687, found 260.0683.

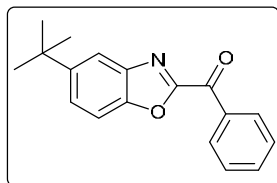

**(5-(tert-butyl)benzo[d]oxazol-2-yl)(phenyl)methanone (2t)**: Yield: 96%; white crystalline solid; m. p. 70-72°C;  $^1\text{H NMR}$  (400 MHz,  $\text{CDCl}_3$ )  $\delta$  8.57-8.54 (m, 2H), 7.95 (t,  $J = 1.2$  Hz, 1H), 7.68 (1H, tt,  $J = 6.8, 1.2$  Hz), 7.63-7.62 (m, 2H), 7.58-7.54 (m, 2H), 1.41 (s, 9H).  $^{13}\text{CNMR}$  ( $\text{CDCl}_3$ , 100 MHz):

$\delta$  180.5, 157.3, 149.4, 148.4, 140.7, 134.1, 130.9, 128.5, 126.5, 118.4, 110.0, 31.6. HRMS-ESI (m/z): calcd for  $\text{C}_{18}\text{H}_{17}\text{NNaO}_2$  [ $\text{M} + \text{Na}$ ] $^+$ : 302.1157, found 302.1154.

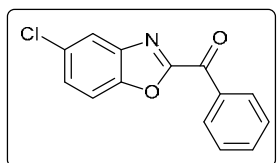

**(5-chlorobenzo[d]oxazol-2-yl)(phenyl)methanone (2u)**: Yield: 86%; beige solid; m. p. 98-100°C;  $^1\text{H NMR}$  (400 MHz,  $\text{CDCl}_3$ )  $\delta$  8.54-8.52 (2H, m), 7.94 (d, 1H,  $J = 2$  Hz), 7.71 (1H, td,  $J = 6.8, 1.2$  Hz), 7.65 (1H, d,  $J = 8.8$  Hz), 7.60-7.56 (m, 2H), 7.53 (1H, dd,  $J = 2.4$  Hz).  $^{13}\text{CNMR}$  ( $\text{CDCl}_3$ , 100 MHz):  $\delta$  180.17,

158.08, 148.97, 141.75, 134.76, 134.55, 131.32, 131.02, 128.90, 128.70, 122.12, 112.71. HRMS-ESI (m/z): calcd for  $\text{C}_{14}\text{H}_8\text{ClNNaO}_2$  [ $\text{M} + \text{Na}$ ] $^+$ : 280.0141, found 280.0137

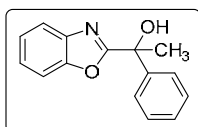

**1-(benzo[d]oxazol-2-yl)-1-phenylethan-1-ol (3a)**:<sup>4</sup> Yield: 88%; beige solid; m. p. 66-68°C;  $^1\text{H NMR}$  (400 MHz,  $\text{CDCl}_3$ )  $\delta$  7.28-7.70 (m, 1H), 7.54 (d,  $J = 7.2$  Hz, 2H), 7.49-7.47 (m, 1H), 7.37-7.26 (m, 5H), 2.08 (s, 3H).  $^{13}\text{CNMR}$  ( $\text{CDCl}_3$ ,

100 MHz):  $\delta$  169.2, 151.1, 143.7, 140.4, 128.4, 127.9, 125.2, 124.9, 124.5, 120.2, 110.8, 73.6, 28.6.

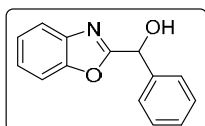

**benzo[d]oxazol-2-yl(phenyl)methanol (3b)**:<sup>4</sup> Yield: 73%; pale-yellow solid; m.

p. 106-108°C;  $^1\text{H NMR}$  (400 MHz,  $\text{CDCl}_3$ )  $\delta$  7.67-7.63 (m, 1H), 7.54-7.51 (m, 2H), 7.47-7.43 (m, 1H), 7.39-7.33 (m, 3H), 7.31-7.29 (dd,  $J = 3.2$  Hz, 2H), 6.04 (d,  $J = 4.8$  Hz, 1H), 4.40 (d,  $J = 5.6$  Hz, 1H).  $^{13}\text{CNMR}$  ( $\text{CDCl}_3$ , 100 MHz):  $\delta$  166.6, 150.9, 140.2, 138.8, 128.77, 128.74, 126.8, 125.2, 124.5, 120.0, 110.8, 70.5.

### 3.2 Isolated Intermediates:

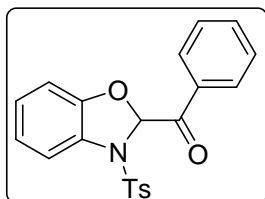

**phenyl(3-tosyl-2,3-dihydrobenzo[d]oxazol-2-yl)methanone (1a')**: Yield: 96%; white solid; m. p. 140-142°C; <sup>1</sup>H NMR (400 MHz, CDCl<sub>3</sub>) δ 8.21-8.19 (m, 2H), 7.63 (tt, J = 6.8 Hz, 1H), 7.54-7.48 (m, 5H), 7.17 (d, J = 8.0 Hz, 2H), 7.06 (td, J = 8.0, 1.2 Hz, 1H), 7.00 (s, 1H), 6.95 (td, J = 7.6, 1.2 Hz, 1H), 6.73 (dd, J = 8.0, 1.6 Hz, 1H), 2.36 (s, 3H). <sup>13</sup>CNMR (CDCl<sub>3</sub>, 100 MHz): δ 188.4, 152.3, 145.1, 134.2, 132.9, 132.5, 129.6, 129.5, 128.5, 127.8, 127.6, 122.1, 119.0, 109.8, 91.4, 21.6.

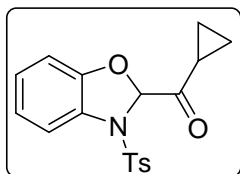

**cyclopropyl(3-tosyl-2,3-dihydrobenzo[d]oxazol-2-yl)methanone (1r')**: Yield: 92%; white solid; m. p. 102-104 °C; <sup>1</sup>H NMR (400 MHz, CDCl<sub>3</sub>) δ 7.57 (dd, J = 7.6, 1.2 Hz, 1H), 7.46 (d, J = 8.4 Hz, 2H), 7.17 (d, J = 8.0 Hz, 2H), 7.06 (td, J = 8.0, 1.6 Hz, 1H), 6.97 (td, J = 7.6, 0.8 Hz, 1H), 6.75 (dd, J = 7.6, 0.8 Hz, 1H), 6.17 (s, 1H), 2.54-2.48 (m, 1H), 2.36 (s, 3H), 1.55-1.04 (m, 4H). <sup>13</sup>CNMR (CDCl<sub>3</sub>, 100 MHz): δ 201.3, 151.9, 145.2, 132.1, 129.7, 128.0, 127.6, 127.5, 122.1, 118.5, 109.9, 93.9, 21.5, 16.1, 13.2, 12.4.

### 3.3 For Starting Materials:

**N-(2-hydroxyphenyl)-4-methyl-N-(2-oxo-2-phenylethyl)benzenesulfonamide (1a)** Yield: 63%;

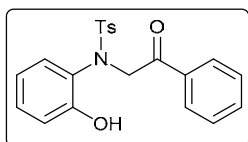

Off-white solid; m. p. 148-150°C; <sup>1</sup>H NMR (400 MHz, CDCl<sub>3</sub>) δ 8.65 (s, 1H), 7.96 (d, J = 7.2 Hz, 2H), 7.62-7.60 (m, 3H), 7.51-7.47 (m, 2H), 7.28 (d, J = 8.0 Hz, 2H), 7.23-7.18 (m, 1H), 6.94 (dd, J = 8.0, 1.2 Hz, 2H), 6.88 (dd, J = 7.8, 2.4 Hz, 1H), 6.77-6.73 (m, 1H), 2.44 (s, 3H). <sup>13</sup>CNMR (CDCl<sub>3</sub>, 100 MHz): δ 196.5, 144.2, 135.5, 134.5, 133.8, 130.9, 129.9, 129.5, 128.9, 128.3, 128.0, 126.1, 120.1, 117.7, 58.4, 21.6. HRMS-ESI (m/z): calcd for C<sub>21</sub>H<sub>19</sub>NO<sub>4</sub>S [M + Na]<sup>+</sup>: 404.0938, found 404.0927.

**N-(2-hydroxyphenyl)-N-(2-(4-methoxyphenyl)-2-oxoethyl)-4-methylbenzenesulfonamide (1b)**:

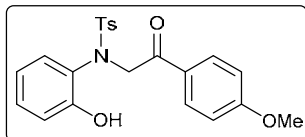

Yield: 62%; white solid; m. p. 150-158°C; <sup>1</sup>H NMR (400 MHz, CDCl<sub>3</sub>) δ 8.94 (s, 1H), 7.94 (d, J = 8.8 Hz, 2H), 7.61 (d, J = 8.4 Hz, 2H), 7.27 (d, J = 7.6 Hz, 2H), 7.22-7.17 (m, 1H), 6.94 (d, J = 8.8 Hz, 2H), 6.19-6.89 (m, 2H), 6.77-6.72 (m, 1H), 4.8-5.4 (bs, 2H), 3.88 (s, 3H), 2.43 (s, 3H). <sup>13</sup>CNMR (CDCl<sub>3</sub>, 100 MHz): δ 194.9, 164.6, 156.0, 144.0, 135.7, 130.8, 130.7, 130.1, 129.4, 128.0, 126.7, 126.2,

120.0, 117.7, 114.1, 58.0, 55.5, 21.6. HRMS-ESI (m/z): calcd for C<sub>22</sub>H<sub>21</sub>NNaO<sub>5</sub>S [M + Na]<sup>+</sup>: 434.1038, found 434.1033.

**N-(2-hydroxyphenyl)-N-(2-(2-methoxyphenyl)-2-oxoethyl)-4-methylbenzenesulfonamide(1c):**

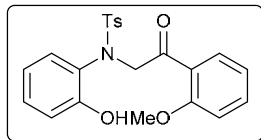

Yield: 66%; White solid; m. p. 118-120°C; <sup>1</sup>H NMR (400 MHz, CDCl<sub>3</sub>) δ 8.86 (s, 1H), 7.97 (dd, *J* = 8.0, 2.0 Hz, 1H), 7.62-7.59 (m, 2H), 7.54 (dddd, *J* = 7.2, 1.6 Hz, 1H), 7.27-7.25 (m, 2H), 7.22-7.17 (m, 1H), 7.06-7.02 (m, 1H), 7.06-7.02 (m, 1H), 6.98 (bs, *J* = 8.4 Hz, 1H), 6.94-6.91 (m, 1H), 6.75 (m, 1H), 4.4-5.4 (bs, 2H), 3.93 (s, 3H), 2.43 (s, 3H). <sup>13</sup>CNMR (CDCl<sub>3</sub>, 100 MHz): δ 198.1, 159.7, 156.0, 143.9, 135.9, 135.6, 131.6, 130.6, 129.4, 128.0, 126.5, 124.0, 121.1, 119.9, 117.5, 111.5, 62.7, 55.6, 21.6. HRMS-ESI (m/z): calcd for C<sub>22</sub>H<sub>21</sub>NNaO<sub>5</sub>S [M + Na]<sup>+</sup>: 434.1038, found 434.1033.

**N-(2-hydroxyphenyl)-4-methyl-N-(2-oxo-2-(p-tolyl)ethyl)benzenesulfonamide(1d):** Yield: 71%;

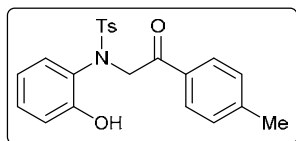

white solid; 150-152°C; <sup>1</sup>H NMR (400 MHz, CDCl<sub>3</sub>) δ 8.81 (s, 1H), 7.86 (d, *J* = 8.4 Hz, 2H), 7.61 (d, *J* = 8.0 Hz, 2H), 7.29-7.26 (m, 4H), 7.22-7.18 (m, 1H), 6.93 (dd, *J* = 8.4, 1.6 Hz, 1H), 6.88 (dd, *J* = 8.4, 2.0 Hz, 1H), 6.77-6.73 (m, 1H), 5.6-4.6 (bs, 2H), 2.44 (s, 3H), 2.42 (s, 3H). <sup>13</sup>CNMR (CDCl<sub>3</sub>, 100 MHz): δ 196.1, 155.9, 145.7, 131.2, 130.8, 130.0, 129.6, 129.5, 128.4, 128.0, 126.1, 120.1, 117.7, 58.2, 21.8, 21.6. HRMS-ESI (m/z): calcd for C<sub>22</sub>H<sub>21</sub>NNaO<sub>4</sub>S [M + Na]<sup>+</sup>: 418.1089, found 418.1081.

**N-(2-(4-cyanophenyl)-2-oxoethyl)-N-(2-hydroxyphenyl)-4-methylbenzenesulfonamide (1e):**<sup>5</sup>

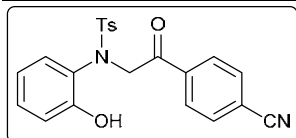

Yield: ~60%; brown solid; The crude has taken to next step without purification. HRMS-ESI (m/z): calcd for C<sub>22</sub>H<sub>21</sub>NNaO<sub>4</sub>S [M + Na]<sup>+</sup>: 449.0885, found 449.0877.

**N-(2-hydroxyphenyl)-4-methyl-N-(2-(4-nitrophenyl)-2-oxoethyl)benzenesulfonamide (1f):**<sup>5</sup>

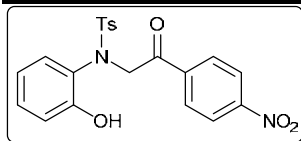

Yield: ~60%; orange-yellow solid; The crude has taken to next step without purification. HRMS-ESI (m/z): calcd for C<sub>22</sub>H<sub>21</sub>NNaO<sub>4</sub>S [M + Na]<sup>+</sup>: 449.0783, found 449.0776.

**N-(2-(4-fluorophenyl)-2-oxoethyl)-N-(2-hydroxyphenyl)-4-methylbenzenesulfonamide (1g):**<sup>6</sup>

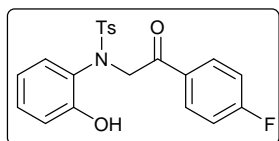

Yield: 51%; beige solid; m. p. 144-146°C; <sup>1</sup>H NMR (400 MHz, CDCl<sub>3</sub>) δ 8.60 (s, 1H), 8.02-7.98 (m, 2H), 7.61-7.58 (m, 2H), 7.28-7.26 (m, 2H), 7.22-7.14 (m, 3H), 6.93 (dd, *J* = 8.0, 1.2 Hz, 1H), 6.85 (dd, *J* = 8.0, 1.6 Hz,

1H), 6.75 (td,  $J = 8.0, 1.6$  Hz), 4.6-5.2 (bs, 2H), 2.44 (s, 3H).  $^{13}\text{C}$ NMR ( $\text{CDCl}_3$ , 100 MHz):  $\delta$  195.0, 167.8 165.2 155.8, 144.2, 135.4, 131.1 (d,  $J_{\text{F}} = 9.1$  Hz), 130.9, 130.3 (d,  $J_{\text{F}} = 2.0$  Hz), 129.5, 128.5, 126.0, 120.1, 117.7, 116.2 (d,  $J_{\text{F}} = 22$  Hz), 58.2, 21.6. HRMS-ESI (m/z): calcd for  $\text{C}_{21}\text{H}_{18}\text{FNNaO}_4\text{S}$   $[\text{M} + \text{Na}]^+$ : 422.0838, found 422.0832.

***N*-(2-(3-fluorophenyl)-2-oxoethyl)-*N*-(2-hydroxyphenyl)-4-methylbenzenesulfonamide (1h):**

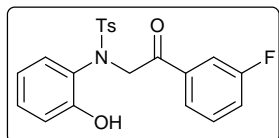

Yield: 58%; beige solid; m. p. 136-138°C;  $^1\text{H}$  NMR (400 MHz,  $\text{CDCl}_3$ )  $\delta$  8.46 (s, 1H), 7.74 (d,  $J = 7.6$  Hz, 1H), 7.68-7.63 (m, 1H), 7.59 (d,  $J = 8.0$  Hz, 2H), 7.51-7.46 (m, 1H), 7.36-7.31 (m, 1H), 7.28 (d,  $J = 8.0$  Hz, 2H), 7.23-7.19 (m, 1H), 6.94 (dd,  $J = 8.4, 1.2$  Hz, 1H), 6.83 (dd,  $J = 8.0, 1.6$  Hz, 1H), 6.76-6.72 (m, 1H), 5.4-4.8 (bs, 2H), 2.44 (s, 3H).  $^{13}\text{C}$ NMR ( $\text{CDCl}_3$ , 100 MHz):  $\delta$  195.4, 164.0, 155.7, 144.3, 135.2, 130.9, 130.7 ( $J_{\text{F}} = 8.3$  Hz), 129.8, 129.5, 128.0, 124.0 ( $J_{\text{F}} = 3$  Hz), 121.6 ( $J_{\text{F}} = 21.2$  Hz), 120.2, 117.7, 115.1 ( $J_{\text{F}} = 22.7$ ), 58.5, 21.6. HRMS-ESI (m/z): calcd for  $\text{C}_{21}\text{H}_{18}\text{FNNaO}_4\text{S}$   $[\text{M} + \text{Na}]^+$ : 422.0838, found 422.0832.

***N*-(2-(2-fluorophenyl)-2-oxoethyl)-*N*-(2-hydroxyphenyl)-4-methylbenzenesulfonamide (1i):**

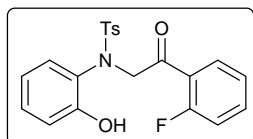

Yield: 60%; brown solid; m. p. 133-135°C;  $^1\text{H}$  NMR (400 MHz,  $\text{CDCl}_3$ )  $\delta$  8.53 (s, 1H), 8.04 (td,  $J = 7.6, 1.6$  Hz, 1H), 7.63-7.58 (m, 3H), 7.30-7.23 (m, 3H), 7.22-7.14 (m, 2H), 6.97 (dd,  $J = 8.0, 1.2$  Hz, 1H), 6.77-6.70 (m, 2H), 4.6-5.2 (bs, 2H), 2.44 (s, 3H).  $^{13}\text{C}$ NMR ( $\text{CDCl}_3$ , 100 MHz):  $\delta$  195.0 (d,  $J_{\text{F}} = 61$  Hz), 163.8, 161.3, 155.9, 144.1, 136. (d,  $J_{\text{F}} = 9.1$ Hz), 136.2, 135.5, 131.3 (d,  $J_{\text{F}} = 2.3$  Hz), 130.8, 129.6, 129.5, 127.9, 126.2, 125.0 (d,  $J_{\text{F}} = 3.1$  Hz), 122.1 (d,  $J_{\text{F}} = 13.7$  Hz), 120.1, 117.6, 116.8 (d,  $J_{\text{F}} = 23.4$ ), 62.2 (d,  $J_{\text{F}} = 12.8$  Hz), 21.6. HRMS-ESI (m/z): calcd for  $\text{C}_{21}\text{H}_{18}\text{FNNaO}_4\text{S}$   $[\text{M} + \text{Na}]^+$ : 422.0838, found 422.0832.

***N*-(2-(4-chlorophenyl)-2-oxoethyl)-*N*-(2-hydroxyphenyl)-4-methylbenzenesulfonamide (1j):**

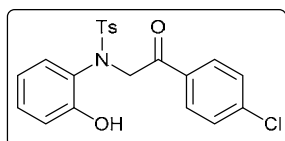

Yield: 67%; beige solid; m. p. 180-182°C;  $^1\text{H}$  NMR (400 MHz,  $\text{CDCl}_3$ )  $\delta$  7.85 (d,  $J = 8.4$  Hz, 2H), 7.67-7.64 (m, 1H), 7.60 (d,  $J = 8.4$  Hz, 2H), 7.44 (dd,  $J = 7.6, 2.0$  Hz, 1H), 7.40-7.29 (m, 4H), 5.22 (s, 3H), 2.25 (s, 3H).  $^{13}\text{C}$ NMR ( $\text{CDCl}_3$ , 100 MHz):  $\delta$  192.6, 143.5, 139.98, 139.94, 136.81, 133.3, 133.1, 131.4, 129.5, 129.4, 129.0, 128.7, 128.4, 128.2, 127.6, 122.8, 122.5, 94.5, 85.8, 56.2, 21.4. HRMS-ESI (m/z): calcd for  $\text{C}_{21}\text{H}_{18}\text{ClNNaO}_4\text{S}$   $[\text{M} + \text{Na}]^+$ : 438.0543, found 438.0536.

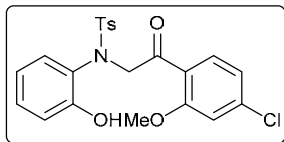

**N-(2-(5-chloro-2-methoxyphenyl)-2-oxoethyl)-N-(2-hydroxyphenyl)-4-methylbenzenesulfonamide (1k):**<sup>6</sup> Yield: 63%; beige solid; m. p. 146-148°C; <sup>1</sup>H NMR (400 MHz, CDCl<sub>3</sub>) δ 8.59 (s, 1H), 7.92 (d, *J* = 2.4 Hz, 1H), 7.59 (d, *J* = 8.4 Hz, 2H), 7.49 (dd, *J* = 8.8, 2.8 Hz, 1H), 7.28 (d, *J* = 7.6 Hz, 1H), 7.22-7.18 (m, 1H), 6.95-7.18 (m, 3H), 6.77-6.73 (m, 1H), 4.8-5.4 (bs, 2H), 3.93 (s, 3H), 2.44 (s, 3H). <sup>13</sup>CNMR (CDCl<sub>3</sub>, 100 MHz): δ 197.1, 158.2, 155.8, 144.0 135.6, 135.1, 131.1 131.0, 130.7, 130.1, 129.4, 128.0, 126.6, 126.3, 125.1, 120.0, 117.5, 113.1, 62.6, 56.1, 21.6. HRMS-ESI (m/z): calcd for C<sub>22</sub>H<sub>20</sub>ClNNO<sub>5</sub>S 468.0468, found 468.0462.

**N-(2-(3,4-dichlorophenyl)-2-oxoethyl)-N-(2-hydroxyphenyl)-4-methylbenzenesulfonamide**

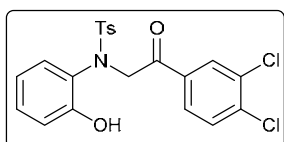

**(1l):**<sup>6</sup>Yield: 63%; beige solid; m. p. 189-191°C; <sup>1</sup>H NMR (400 MHz, CDCl<sub>3</sub>) δ 8.31 (s, 1H), 8.04 (d, *J* = 2.0 Hz, 1H), 7.79 (dd, *J* = 8.4, 2.0 Hz, 1H), 7.59 (d, *J* = 8.4 Hz, 2H), 7.29-7.27 (m, 2H), 7.23-7.19 (m, 1H), 6.94 (dd, *J* = 8.0, 1.2 Hz, 1H), 6.83 (dd, *J* = 8.0, 1.6 Hz), 6.77-6.72 (m, 1H) 2.44 (s, 3H).HRMS-ESI (m/z): calcd for C<sub>21</sub>H<sub>17</sub>Cl<sub>2</sub>NO<sub>4</sub>S [M + Na]<sup>+</sup> : 472.0153, found 472.01448.

**N-(2-hydroxyphenyl)-4-methyl-N-(2-(naphthalen-2-yl)-2-oxoethyl)benzenesulfonamide (1m):**

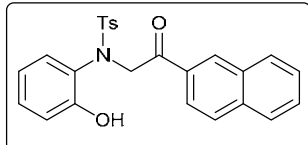

Yield: 66%; white solid; m. p. 158-160°C; <sup>1</sup>H NMR (400 MHz, CDCl<sub>3</sub>) δ 8.76 (s, 1H), 8.47 (s, 1H), 8.00-7.86 (m, 4H), 7.65-7.62 (m, 2H), 7.59-7.55 (m, 2H), 7.28 (d, *J* = 8.0 Hz, 2H), 7.23-7.19 (m, 1H), 6.94 (td, *J* = 8.0, 1.6 Hz, 2H), 6.76 (td, *J* = 7.6, 1.6 Hz, 1H), 5.0-5.4 (bs, 2H), 2.44 (s, 3H). <sup>13</sup>CNMR (CDCl<sub>3</sub>, 100 MHz): δ 196.5, 155.9, 144.2, 131.2, 130.9, 130.4, 130.0, 129.6, 129.5, 129.2, 128.9, 128.0, 127.9, 127.2, 126.2, 123.4 120.1, 117.7, 58.4, 21.6. HRMS-ESI (m/z): calcd for C<sub>25</sub>H<sub>21</sub>NNaO<sub>4</sub>S [M + Na]<sup>+</sup> : 454.1089, found 454.1081.

**N-(2-(furan-2-yl)-2-oxoethyl)-N-(2-hydroxyphenyl)-4-methylbenzenesulfonamide (1n):** Yield:

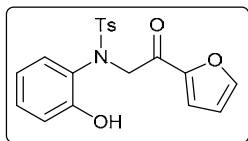

52%; brown solid; m. p. 156-158°C; <sup>1</sup>H NMR (400 MHz, CDCl<sub>3</sub>) δ 8.55 (s, 1H), 7.64-7.59 (m, 3H), 7.36 (dd, *J* = 3.6, 0.8 Hz, 1H), 7.28-7.26 (m, 2H), 7.23-7.18 (m, 1H), 6.93 (dd, *J* = 1.2 Hz, 1H), 6.86 (dd, *J* = 8.0, 1.6 Hz, 1H), 6.76-6.72 (m, 1H), 6.61 (dd, *J* = 3.6, 1.2 Hz, 1H), 4.6-5.2 (2H, bs), 2.43 (3H, s). <sup>13</sup>CNMR (CDCl<sub>3</sub>, 100 MHz): δ 185.5, 155.8, 147.5 144.2, 135.5, 130.9, 129.9, 129.5, 126.1, 120.1, 119.2, 117.7, 112.9, 57.8, 21.6. HRMS-ESI (m/z): calcd for C<sub>19</sub>H<sub>17</sub>NO<sub>5</sub>S [M + Na]<sup>+</sup> : 394.0497, found 394.0718.

**N-(2-hydroxyphenyl)-4-methyl-N-(2-oxo-2-(thiophen-3-yl)ethyl)benzenesulfonamide (1o):**

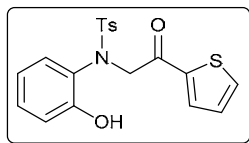

Yield: 56%; white solid; m. p. 166-168°C; <sup>1</sup>H NMR (400 MHz, DMSO-d<sub>6</sub>) δ 9.62 (s, 1H), 8.08-8.04 (m, 2H), 7.59 (d, *J* = 8.4 Hz, 2H), 7.35 d, *J* = 8.0 Hz, 2H), 7.27-7.24 (dd, *J* = 8.8, 3.6 Hz), 7.20 (dd, *J* = 8.0, 1.6 Hz, 2H), 7.13-7.09 (m, 1H), 6.78-6.71 (m, 2H), 5.09 (s, 2H), 2.38 (s, 3H). <sup>13</sup>CNMR (DMSO-d<sub>6</sub>, 100 MHz): δ 189.1, 154.3, 143.1, 140.7, 137.0, 135.6, 133.9, 132.6, 129.6, 129.4, 128.9, 127.3, 125.3, 118.7, 116.4, 55.8, 21.0. HRMS-ESI (m/z): calcd for C<sub>19</sub>H<sub>17</sub>NNaO<sub>4</sub>S<sub>2</sub> [M + Na]<sup>+</sup>: 410.0497, found 410.0489.

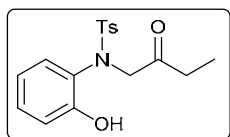

**N-(2-hydroxyphenyl)-4-methyl-N-(2-oxobutyl)benzenesulfonamide (1p):**

Yield: 46%; Off-white solid; m. p. 108-110°C; <sup>1</sup>H NMR (400 MHz, CDCl<sub>3</sub>) δ 8.12 (bs, 1H), 7.58 (d, *J* = 8.0 Hz, 2H), 7.27 (d, *J* = 8.4 Hz, 2H), 7.23-7.19 (m, 1H), 6.97-6.94 (m, 1H), 6.73-6.72 (m, 2H), 4.27 (q, *J* = 7.6 Hz, 2H), 3.8-4.4 (bs, 2H), 2.43 (s, 2H), 1.30 (t, *J* = 7.2 Hz, 3H). <sup>13</sup>CNMR (CDCl<sub>3</sub>, 100 MHz): δ 171.8, 155.5, 144.2, 135.3, 130.9, 129.5, 129.4, 127.9, 126.0, 120.2, 117.6, 62.6, 53.4, 21.6, 13.9. HRMS-ESI (m/z): calcd for C<sub>17</sub>H<sub>19</sub>NNaO<sub>4</sub>S [M + Na]<sup>+</sup>: 356.0932, found 356.0925.

**N-(3,3-dimethyl-2-oxobutyl)-N-(2-hydroxyphenyl)-4-methylbenzenesulfonamide (1q):** Yield:

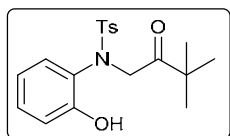

54%; white solid; m. p. 170-172°C; <sup>1</sup>H NMR (400 MHz, CDCl<sub>3</sub>) δ 8.64 (s, 1H), 7.55 (d, *J* = 8.4 Hz, 2H), 7.26-7.24 (m, 3H), 6.91 (dd, *J* = 8.4, 2.4 Hz, 1H), 6.86 (dd, *J* = 8.0, 1.6 Hz, 1H), 6.76-6.71 (m, 1H), 2.42 (s, 3H), 1.21 (s, 9H). <sup>13</sup>CNMR (CDCl<sub>3</sub>, 100 MHz): δ 213.6 155.8, 144.8, 135.1, 135.5, 130.8, 130.0, 129.4, 127.9, 126.1, 120.0, 117.5, 56.9, 43.2, 26.2, 21.6. HRMS-ESI (m/z): calcd for C<sub>19</sub>H<sub>23</sub>NNaO<sub>4</sub>S [M + Na]<sup>+</sup>: 384.1245, found 384.1239.

**N-(2-cyclopropyl-2-oxoethyl)-N-(2-hydroxyphenyl)-4-methylbenzenesulfonamide (1r):**<sup>6</sup> Yield:

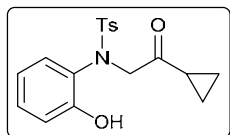

49%; white solid; m. p. 138-140°C; <sup>1</sup>H NMR (400 MHz, CDCl<sub>3</sub>) δ 8.59 (s, 1H), 7.56 (d, *J* = 8.0 Hz, 2H), 7.25 (d, *J* = 7.6 Hz, 2H), 7.22-7.17 (m, 1H), 6.91 (dd, *J* = 8.0, 1.2 Hz, 1H), 6.80 (dd, *J* = 8.0, 2.4 Hz, 1H), 6.74 (m, 1H), 4.2-4.6 (bs, 2H), 2.42 (s, 3H), 1.95-1.89 (m, 1H), 1.29-1.19 (m, 2H), 1.06-1.04 (m, 2H). <sup>13</sup>CNMR (CDCl<sub>3</sub>, 100 MHz): δ 208.6155.7, 144.1, 135.5, 130.8, 129.9, 129.4, 127.9, 126.01, 126.06, 117.7, 61.2, 21.6, 18.1, 12.6. HRMS-ESI (m/z): calcd for C<sub>18</sub>H<sub>19</sub>NNaO<sub>4</sub>S [M + Na]<sup>+</sup>: 368.0932, found 368.0924.

**N-(2-hydroxy-5-methylphenyl)-4-methyl-N-(2-oxo-2-phenylethyl)benzenesulfonamide (1s):**

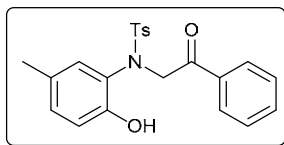

Yield: 64%; White solid; m. p. 156-158°C; <sup>1</sup>H NMR (400 MHz, CDCl<sub>3</sub>) δ 8.40 (s, 1H), 7.97-7.94 (m, 2H), 7.65-7.60 (m, 3H), 7.51-7.46 (m, 2H), 7.29-7.27 (m, 2H), 7.01 dd, *J* = 8.4, 2.4 Hz, 1H), 6.82 (d, *J* = 8.4 Hz, 1H), 6.70 (d, *J* = 1.6 Hz, 1H), 4.6-5.4 (bs, 2H), 2.44 (s, 3H), 2.15 s, 3H). <sup>13</sup>CNMR (CDCl<sub>3</sub>, 100 MHz): δ 195.5, 153.3, 144.1, 135.6, 134.5, 133.9, 131.5, 130.1, 129.5, 129.4, 128.9, 128.3, 128.0, 125.7, 117.3, 58.3, 21.6, 20.2. HRMS-ESI (m/z): calcd for C<sub>22</sub>H<sub>21</sub>NNaO<sub>4</sub>S [M + Na]<sup>+</sup>: 418.1089, found 418.1081.

**N-(5-(tert-butyl)-2-hydroxyphenyl)-4-methyl-N-(2-oxo-2-phenylethyl)benzenesulfonamide (1t):**

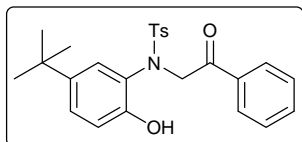

Yield: 64%; white solid; m. p. 185-187°C; <sup>1</sup>H NMR (400 MHz, CDCl<sub>3</sub>) δ 8.57 (s, 1H), 7.97 (d, *J* = 7.2 Hz, 2H), 7.64-7.59 (m, 3H), 7.51-7.47 (m, 2H), 7.29-7.27 (m, 2H), 7.22 (dd, *J* = 8.8, 2.4 Hz), 6.91 (d, *J* = 8.4 Hz, 1H), 9.61 (d, *J* = 2.4 Hz, 1H), 2.44 (s, 3H), 1.11 (s, 9H). <sup>13</sup>CNMR (CDCl<sub>3</sub>, 100 MHz): δ 196.3, 153.5, 144.0, 143.0, 135.7, 134.4, 133.9, 129.5, 128.9, 128.3, 128.0, 127.8, 126.2, 125.3, 117.1, 58.7, 33.8, 31.2, 21.5. HRMS-ESI (m/z): calcd for C<sub>25</sub>H<sub>27</sub>NO<sub>4</sub>S [M + Na]<sup>+</sup>: 460.1158, found 460.1553.

**N-(5-chloro-2-hydroxyphenyl)-4-methyl-N-(2-oxo-2-phenylethyl)benzenesulfonamide (1u):**<sup>5</sup>

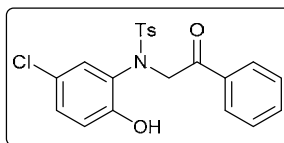

Yield: 41%; pale-yellow solid; Without purification crude was taken to next step. HRMS-ESI (m/z): calcd for C<sub>25</sub>H<sub>27</sub>NO<sub>4</sub>S [M + Na]<sup>+</sup>: 438.0543, found 438.0535

References:

1. L. Carroll King, K. Ostrum, *J. Org. Chem.*, 1964, **29**, 3459.
2. P. Anbarasan, M. Beller, H. Neumann, X. -F. Wu, *Angew. Chem. Int. Ed.*, 2010, **49**, 7316
3. P. Lassalas, F. Marsais, C. Hoarau, *Synlett*, 2013, **24**, 2223;
4. N. Erdmann, M. J. Guant, A. McNally, Q. Y. Toh, S. Vera. *J. Am. Chem. Soc.*, 2013, **135**, 3772;
5. HRMS has been attached.
6. Compounds containing small amount of impurities.



SIVA-RP3-30  
Pulse Sequence: s2pu1  
Solvent: CDCl3  
Ambient temperature  
Mercury-400BB "MercuryPlus400"

Pulse 48.1 degrees  
Acq. time 4.002 sec  
Width 5995.2 Hz  
32 repetitions  
OBSERVE H1, 400.3978956 MHz  
DATA PROCESSING  
Line broadening 0.1 Hz  
FT size 65536  
Total time 2 min, 33 sec

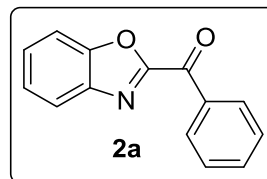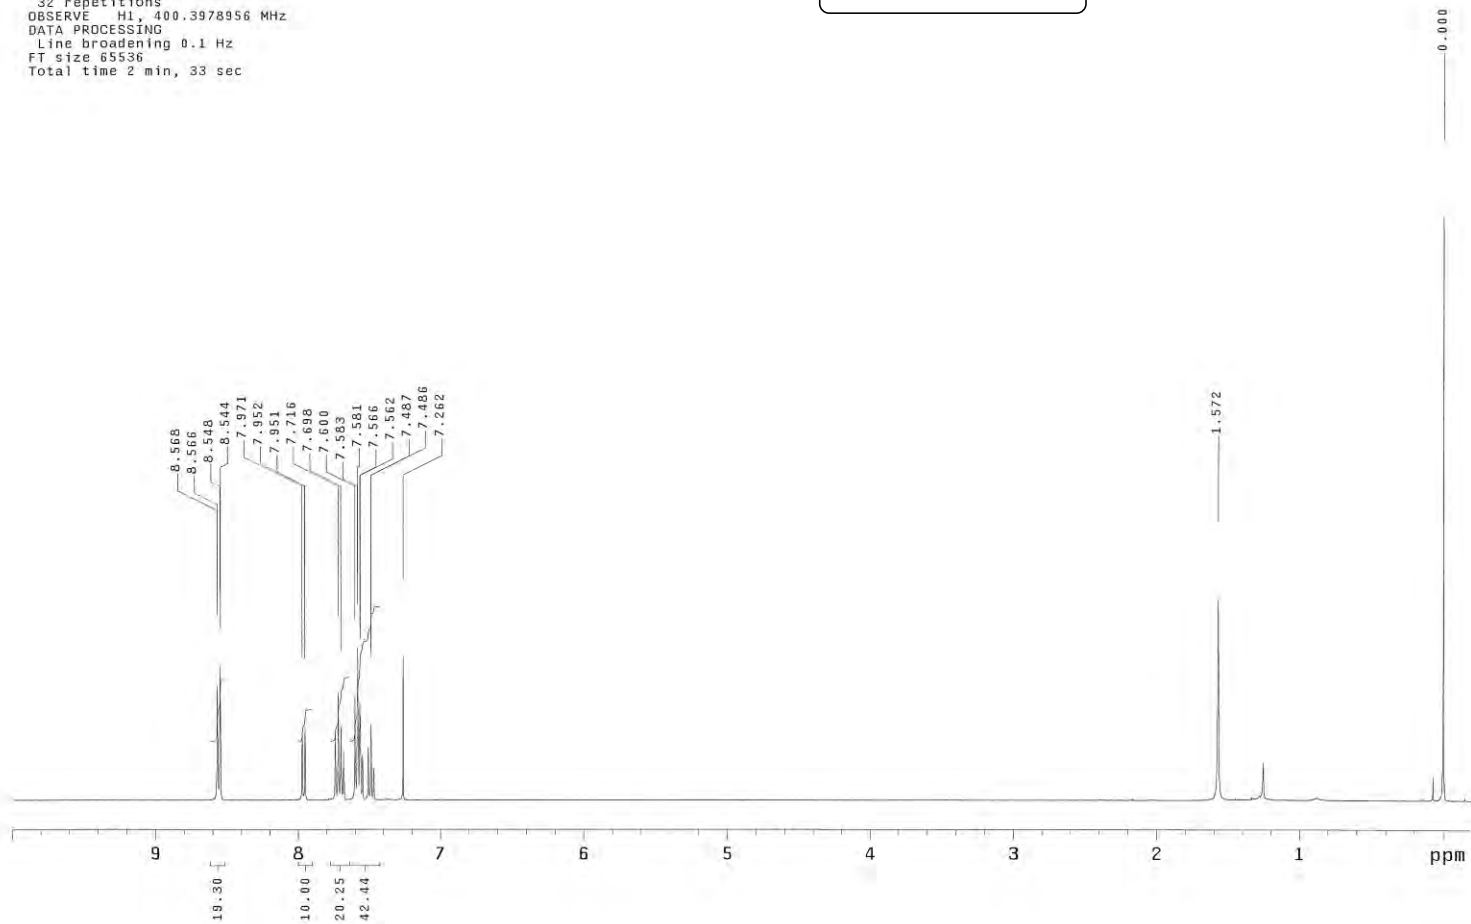

SIVA-RP3-30

Pulse Sequence: s2pul

Solvent: CDCl3  
Ambient temperature  
Mercury-400BB "MercuryPlus400"

Pulse 68.7 degrees  
Acq. time 1.000 sec  
Width 25000.0 Hz  
4416 repetitions  
OBSERVE C13, 100.6801315 MHz  
DECOUPLE H1, 400.3999572 MHz  
Power 38 dB  
continuously on  
VALTZ-16 modulated  
DATA PROCESSING  
Line broadening 1.0 Hz  
FT size 65536  
Total time 21 hr, 51 min, 34 sec

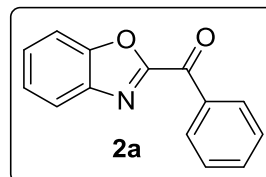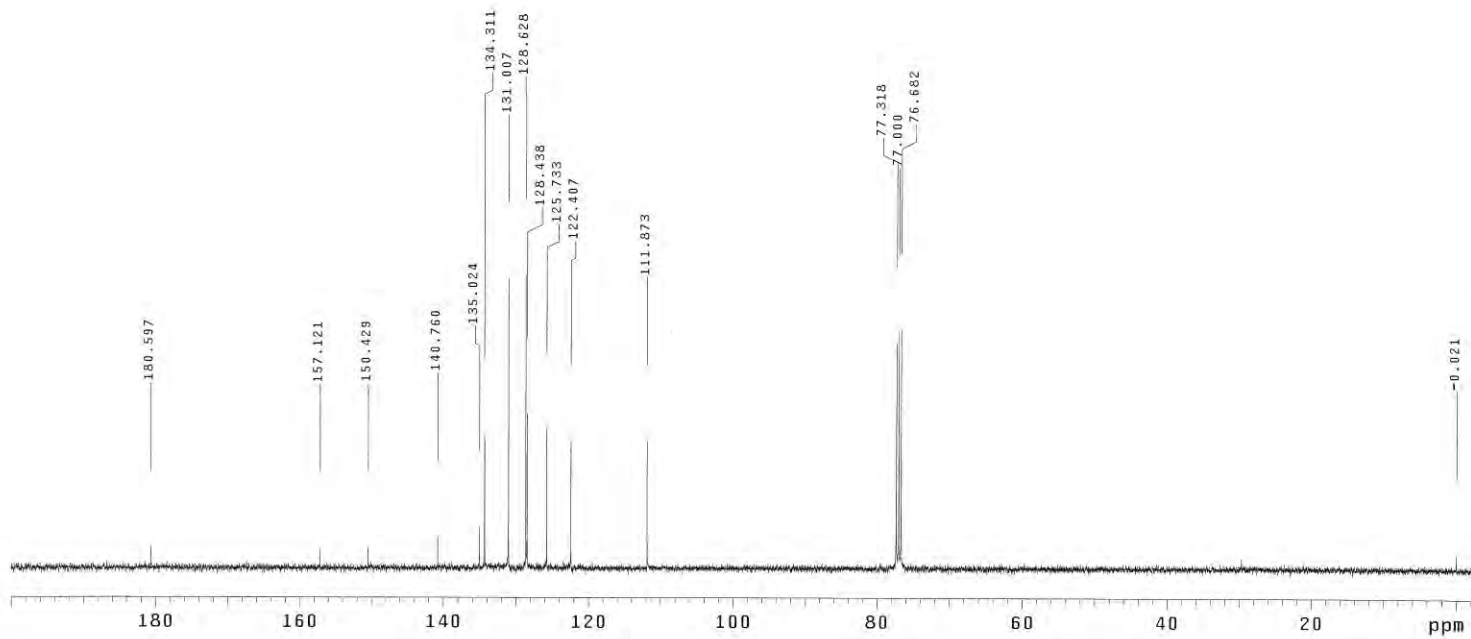

SIVA-RP4-188  
Pulse Sequence: s2pu1  
Mercury-400BB "MercuryPlus400"  
Date: Mar 3 2014  
Solvent: CDCl3  
Ambient temperature  
Total 32 repetitions

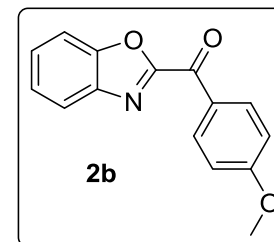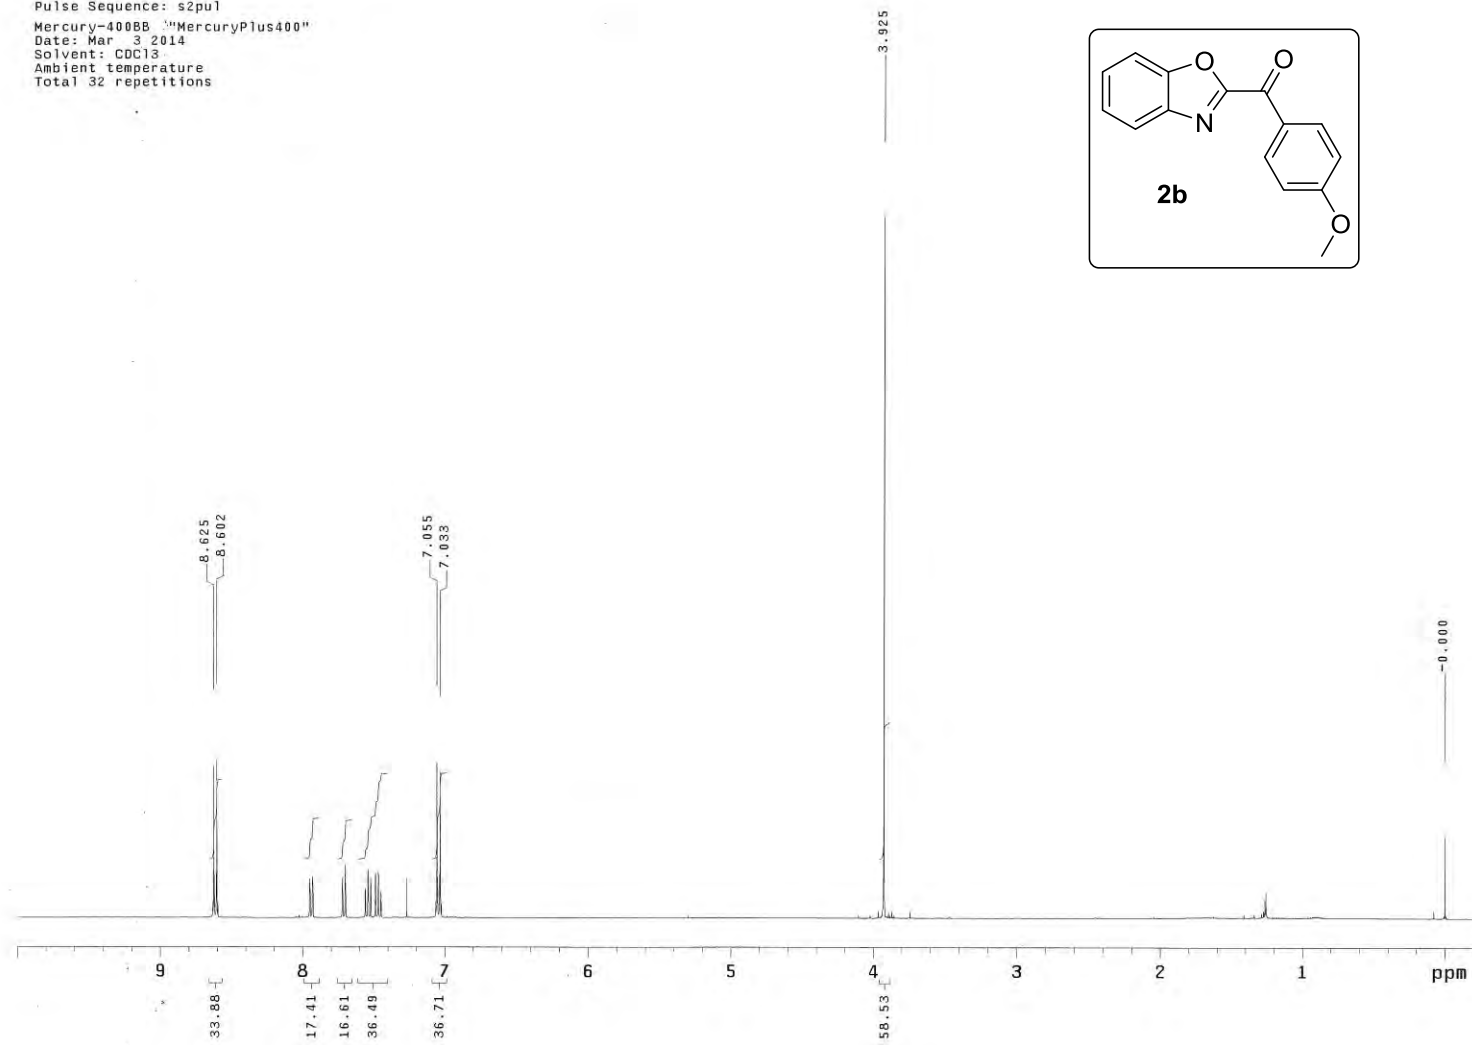

SIVA-RP4-188  
Pulse Sequence: s2pu1  
Mercury-400BB "MercuryPlus400"  
Date: Mar 3 2014  
Solvent: CDCl3  
Ambient temperature  
Total 2144 repetitions

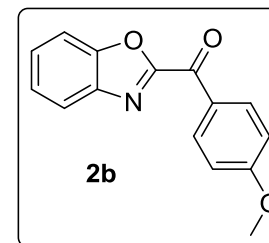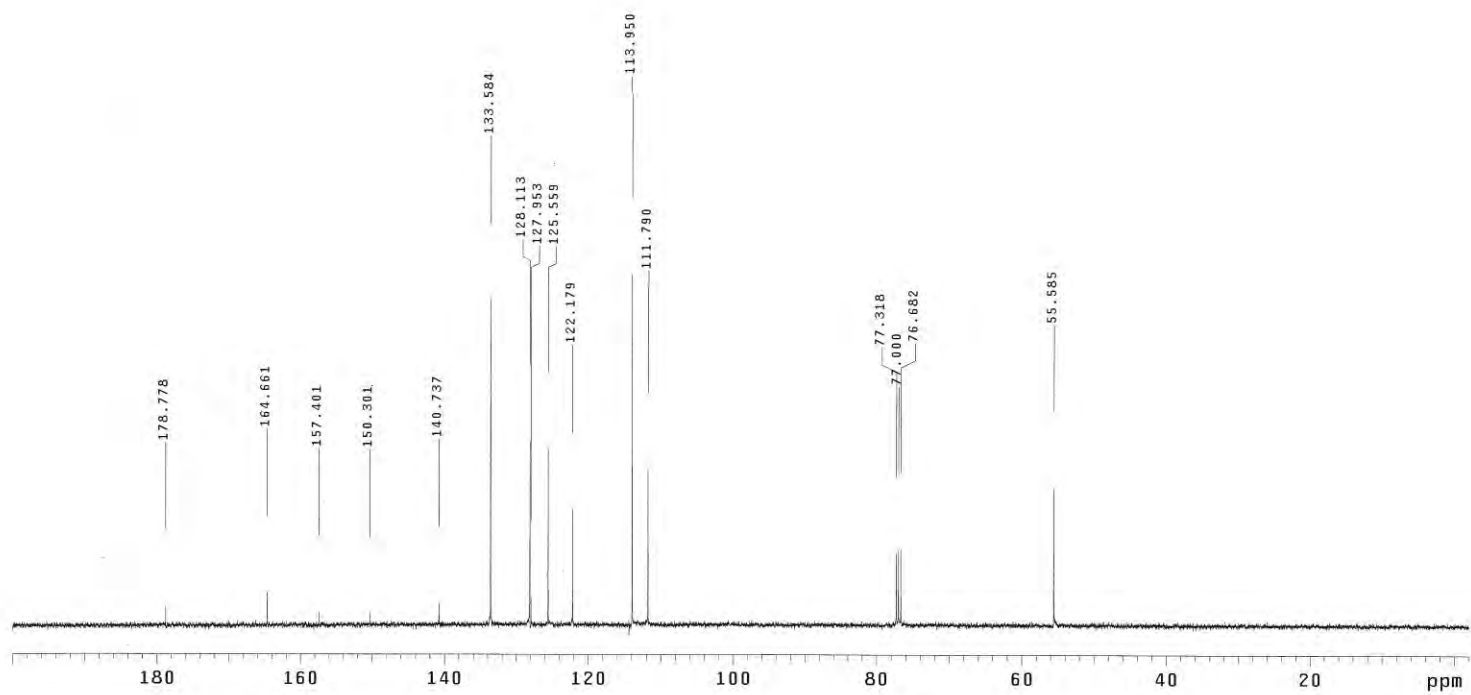

SIVA-RP3-116  
Pulse Sequence: s2pu1  
Solvent: CDCl3  
Ambient temperature  
Mercury-400BB "MercuryPlus400"

Pulse 48.1 degrees  
Acq. time 4.002 sec  
Width 5995.2 Hz  
32 repetitions  
OBSERVE H1, 400.3978951 MHz  
DATA PROCESSING  
FT size 65536  
Total time 2 min, 33 sec

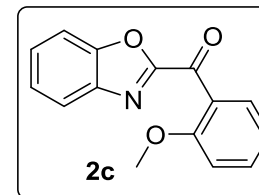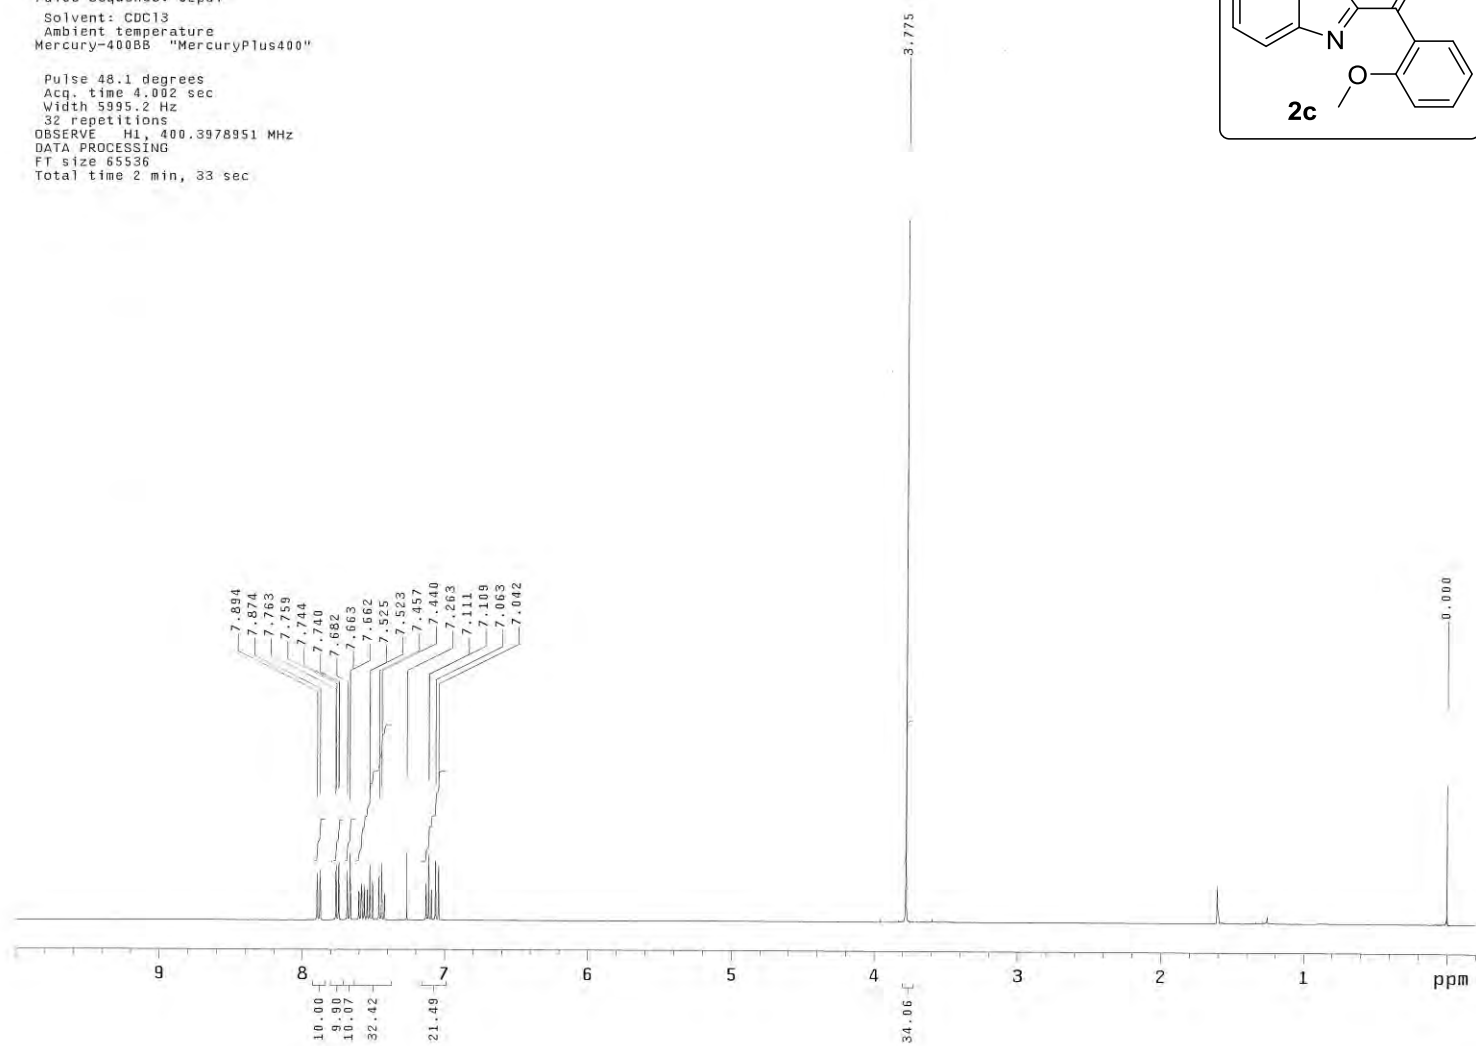

SIVA-RP3-116  
Pulse Sequence: s2pu1  
Solvent: CDCl3  
Ambient temperature  
Mercury-400BB "MercuryPlus400"

Pulse 68.7 degrees  
Acq. time 1.000 sec  
Width 25000.0 Hz  
832 repetitions  
OBSERVE C13, 100.6801323 MHz  
DECOUPLE H1, 400.3999572 MHz  
Power 38 dB  
continuously on  
WALTZ-16 modulated  
DATA PROCESSING  
Line broadening 1.0 Hz  
FT size 65536  
Total time 4 hr, 22 min, 18 sec

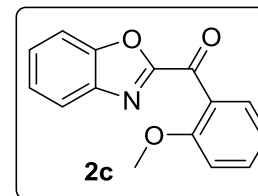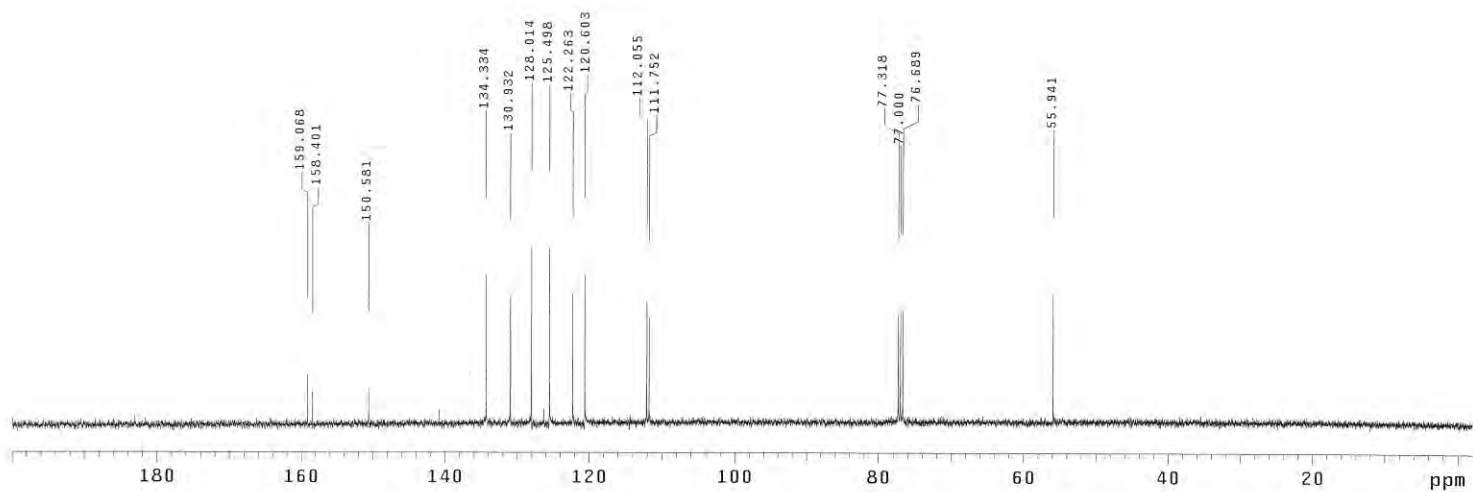

SIVA-RP3-20

Pulse Sequence: s2pu1

UNITYplus-400 "unity400"

Date: Apr 28 2014

Solvent: CDCl<sub>3</sub>

Ambient temperature

Total 64 repetitions

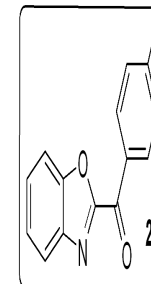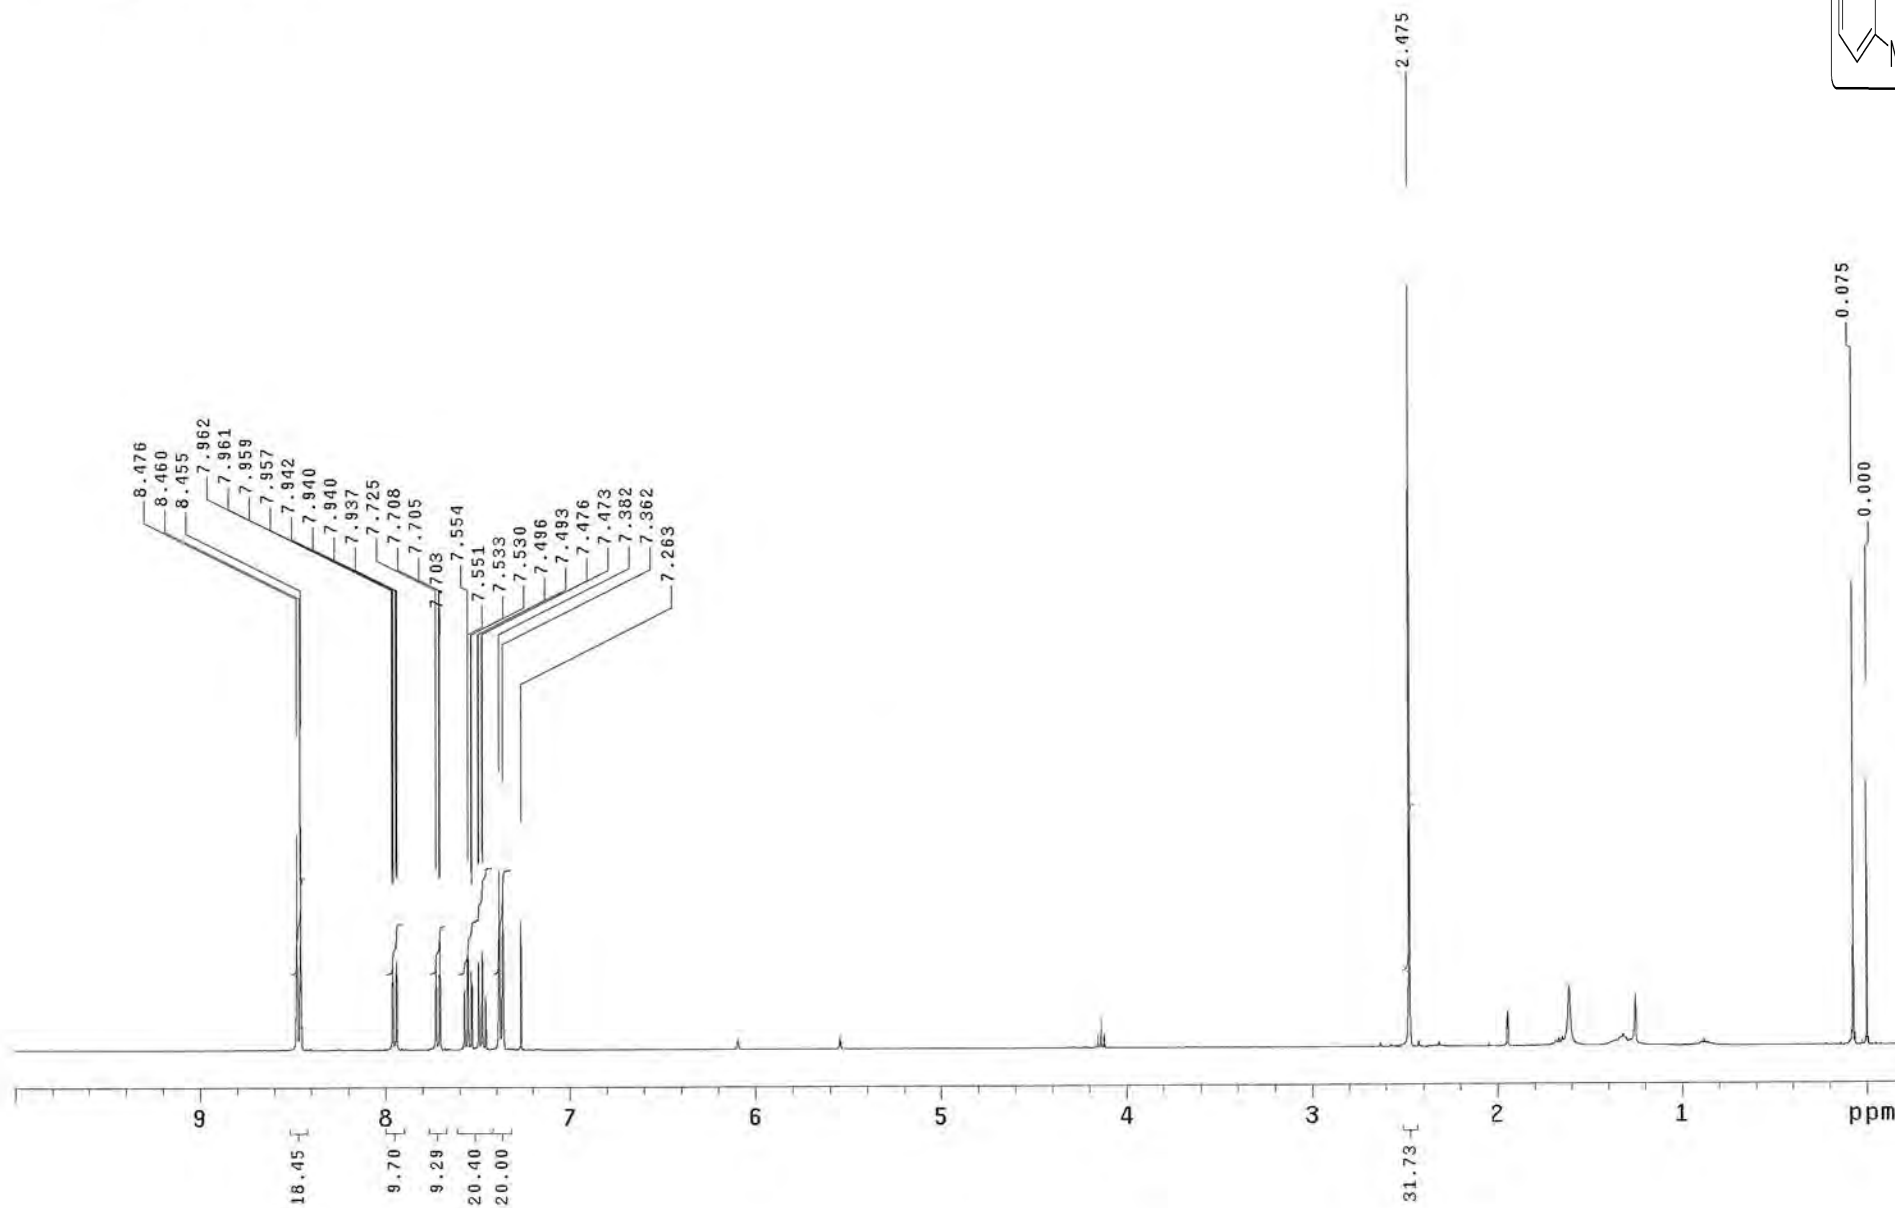

SIVA-RP3-20

Pulse Sequence: s2pu1

UNITYplus-400 "unity400"

Date: Apr 28 2014

Solvent: CDC13

Ambient temperature

Total 7376 repetitions

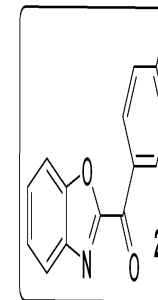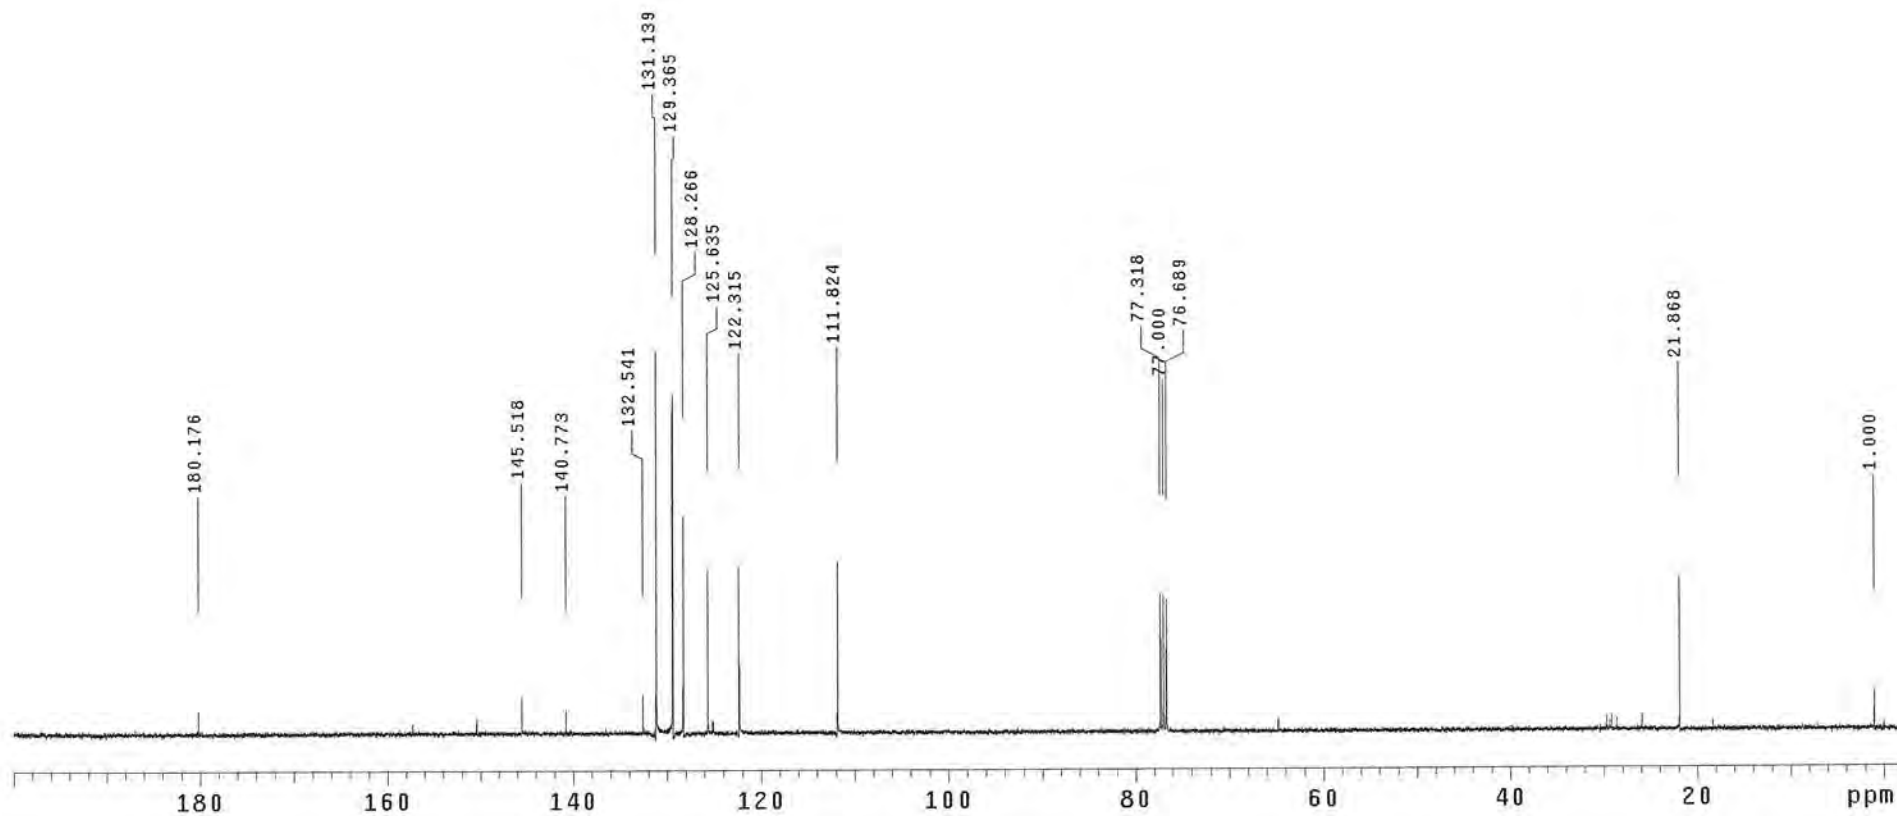



SIVA-RP3-28

Pulse Sequence: s2pu1

Solvent: CDCl3

Ambient temperature

Mercury-400BB "MercuryPlus400"

Pulse 48.1 degrees

Acq. time 4.002 sec

Width 5995.2 Hz

32 repetitions

OBSERVE H1, 400.3978932 MHz

DATA PROCESSING

FT size 65536

Total time 2 min, 33 sec

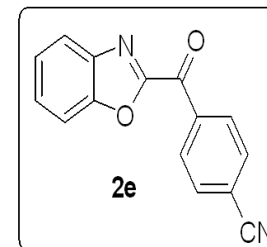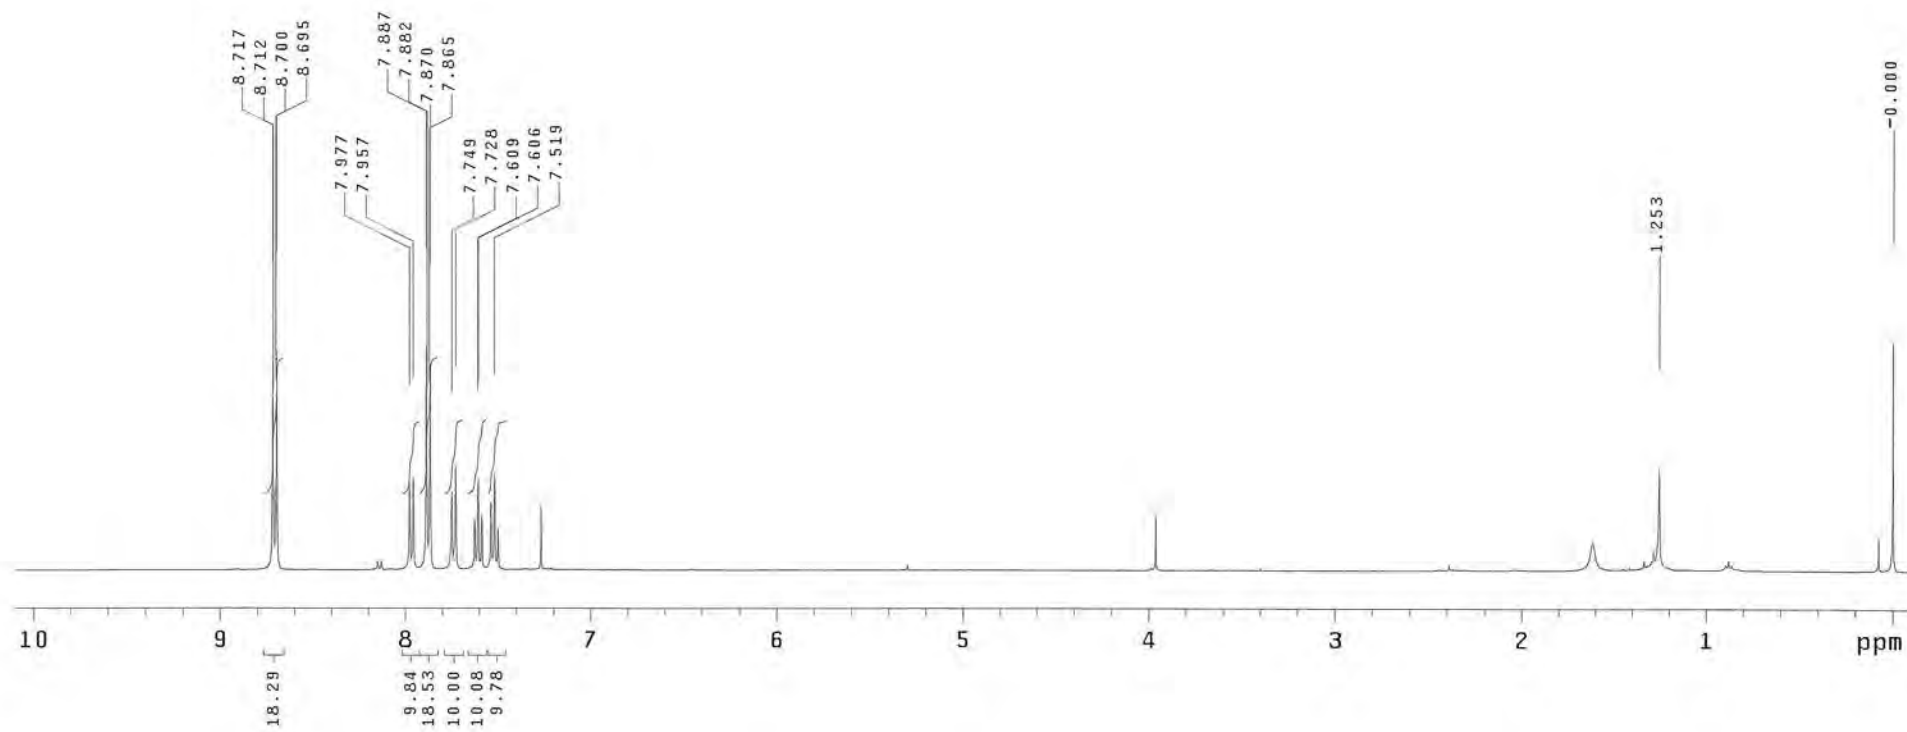

SIVA-RP3-28

Pulse Sequence: s2pu1

Solvent: CDC13

Ambient temperature

Mercury-400BB "MercuryPlus400"

Pulse 68.7 degrees

Acq. time 1.000 sec

Width 25000.0 Hz

6176 repetitions

OBSERVE C13, 100.6801330 MHz

DECOUPLE H1, 400.3999572 MHz

Power 38 dB

continuously on

WALTZ-16 modulated

DATA PROCESSING

Line broadening 1.0 Hz

FT size 65536

Total time 21 hr, 51 min, 34 sec

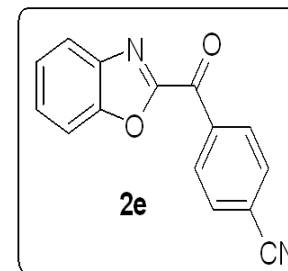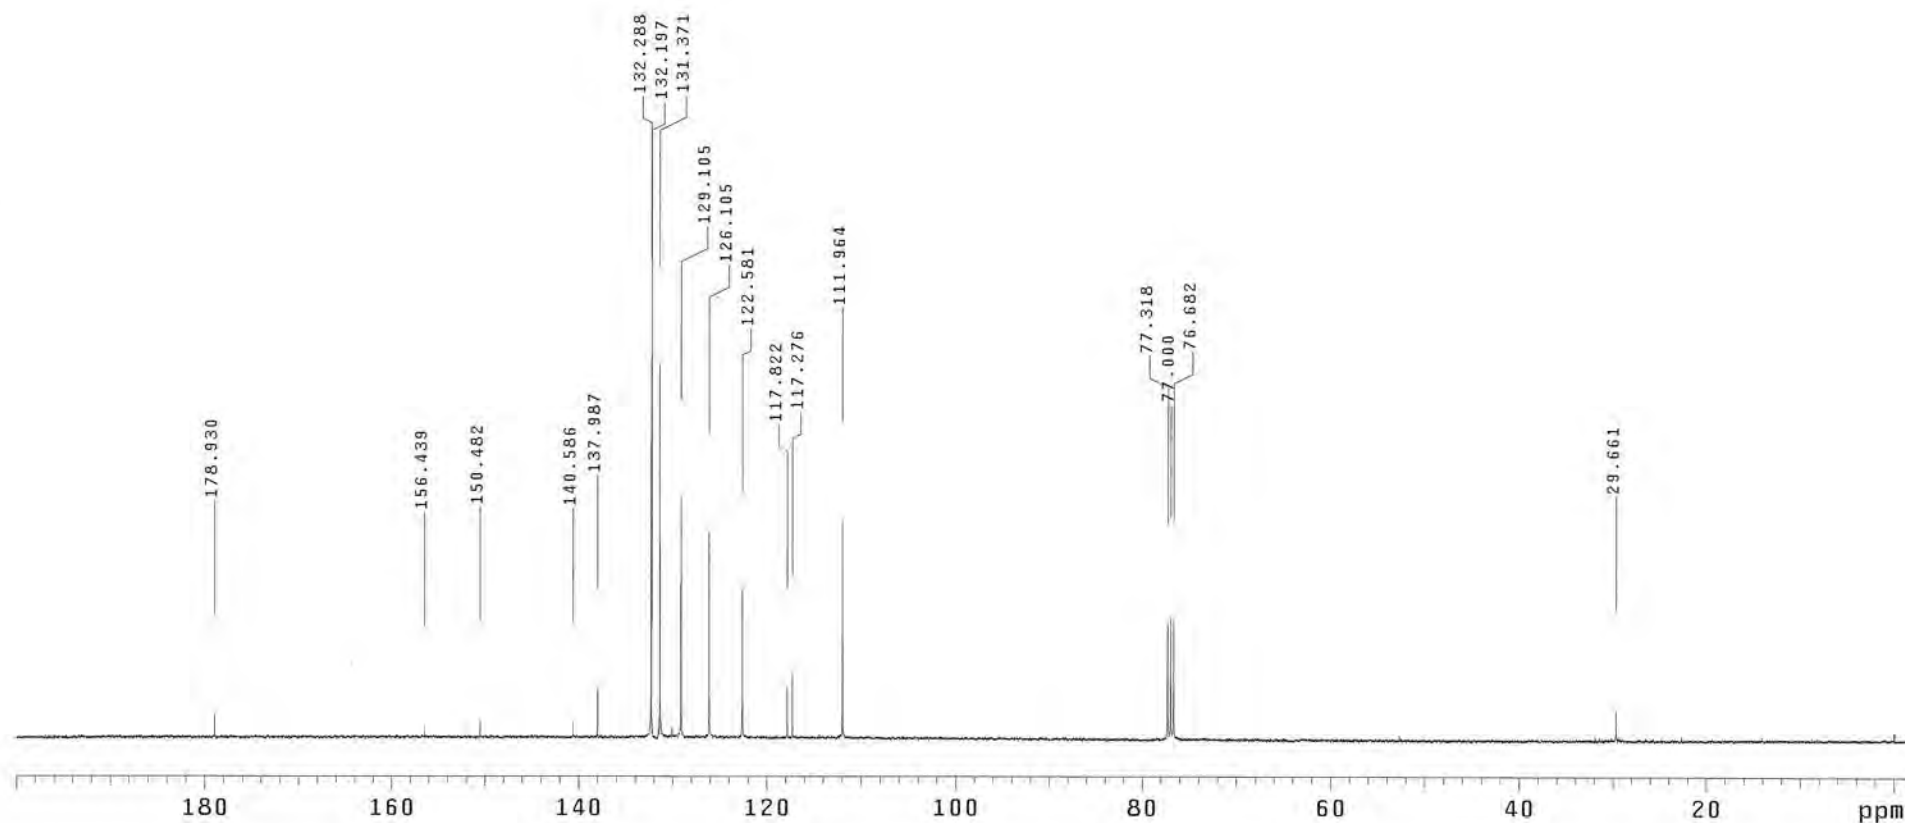

SIVA-RP3-44

Pulse Sequence: s2pu1

UNITYplus-400 "unity400"

Date: Aug 21 2013

Solvent: CDCl3

Ambient temperature

Total 64 repetitions

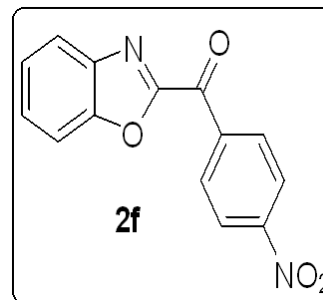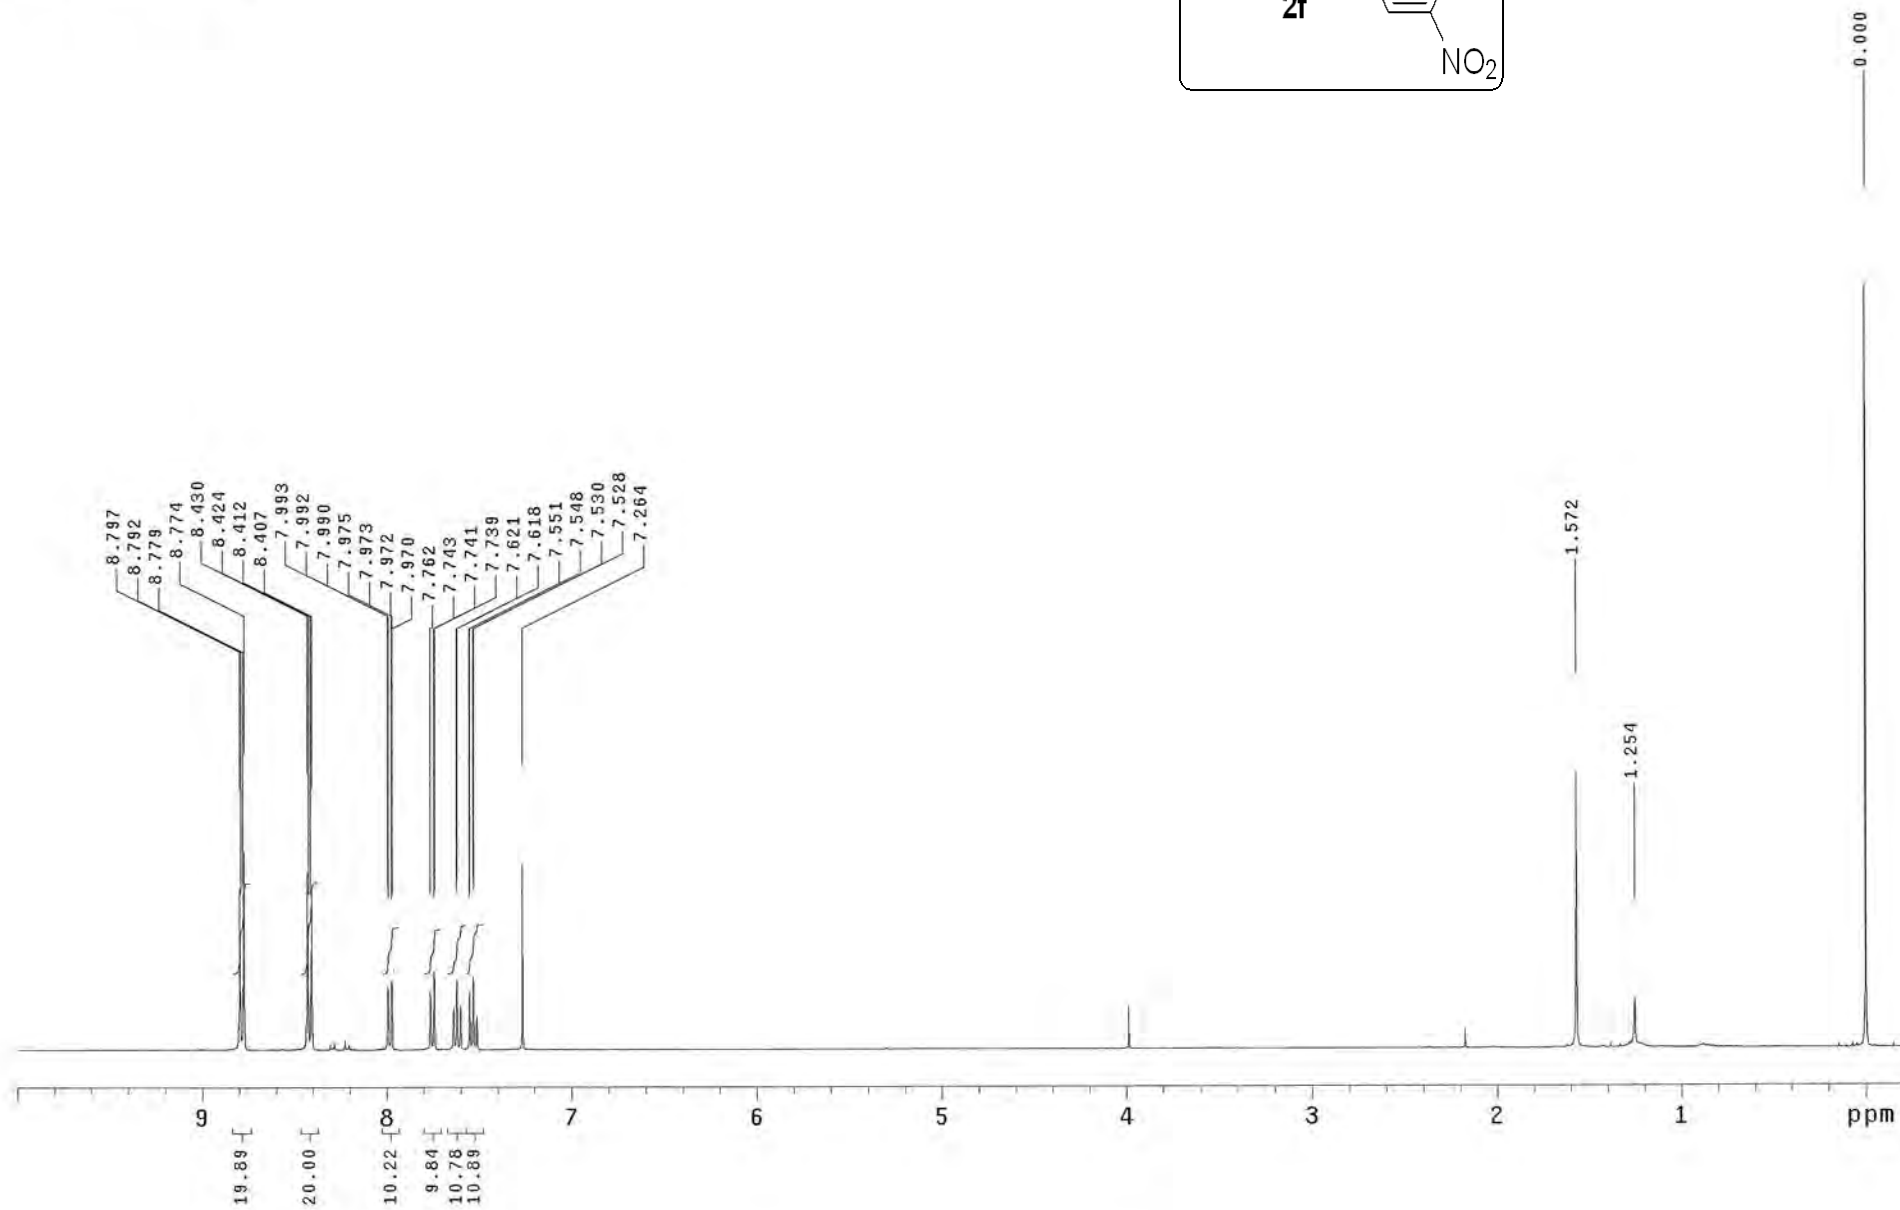

SIVA-RP3-44

Pulse Sequence: s2pu1

UNITYplus-400 "unity400"

Date: Aug 21 2013

Solvent: CDCl<sub>3</sub>

Ambient temperature

Total 8016 repetitions

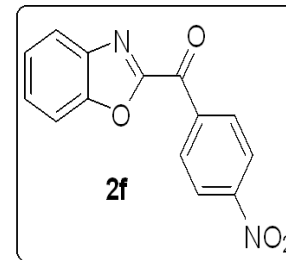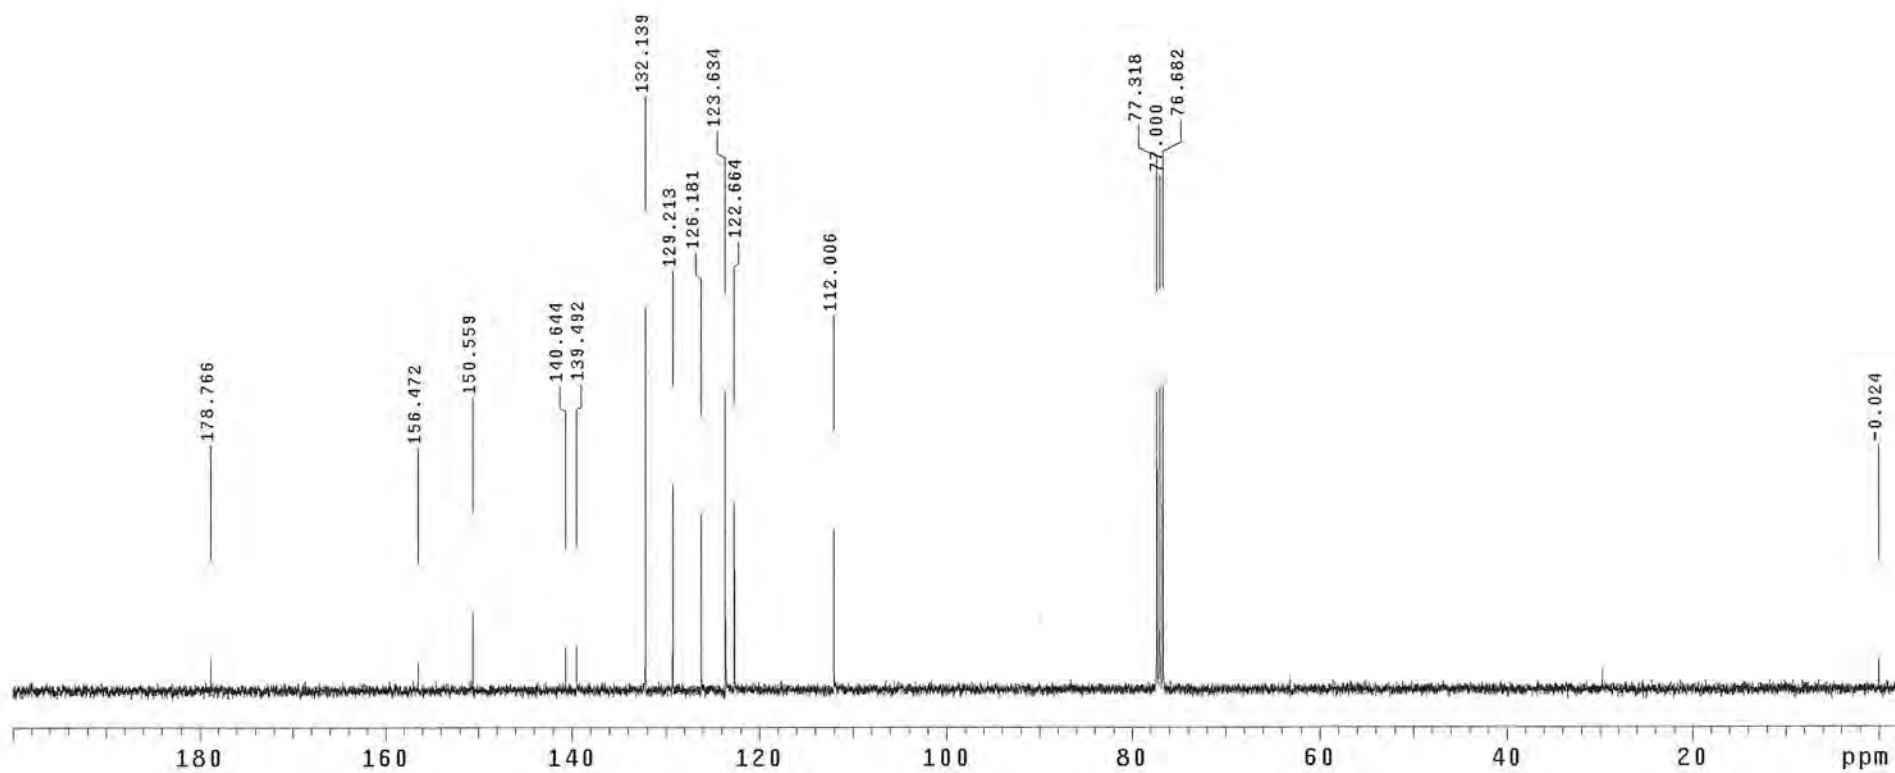

SIVA-RP3-66

Pulse Sequence: s2pu1

Solvent: CDC13

Ambient temperature

Mercury-400BB "MercuryPlus400"

Pulse 48.1 degrees

Acq. time 4.002 sec

Width 5995.2 Hz

24 repetitions

OBSERVE H1, 400.3978949 MHz

DATA PROCESSING

FT size 65536

Total time 2 min, 33 sec

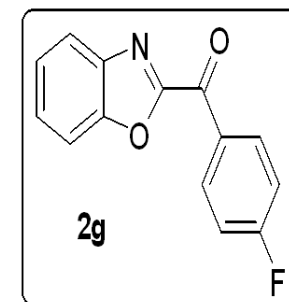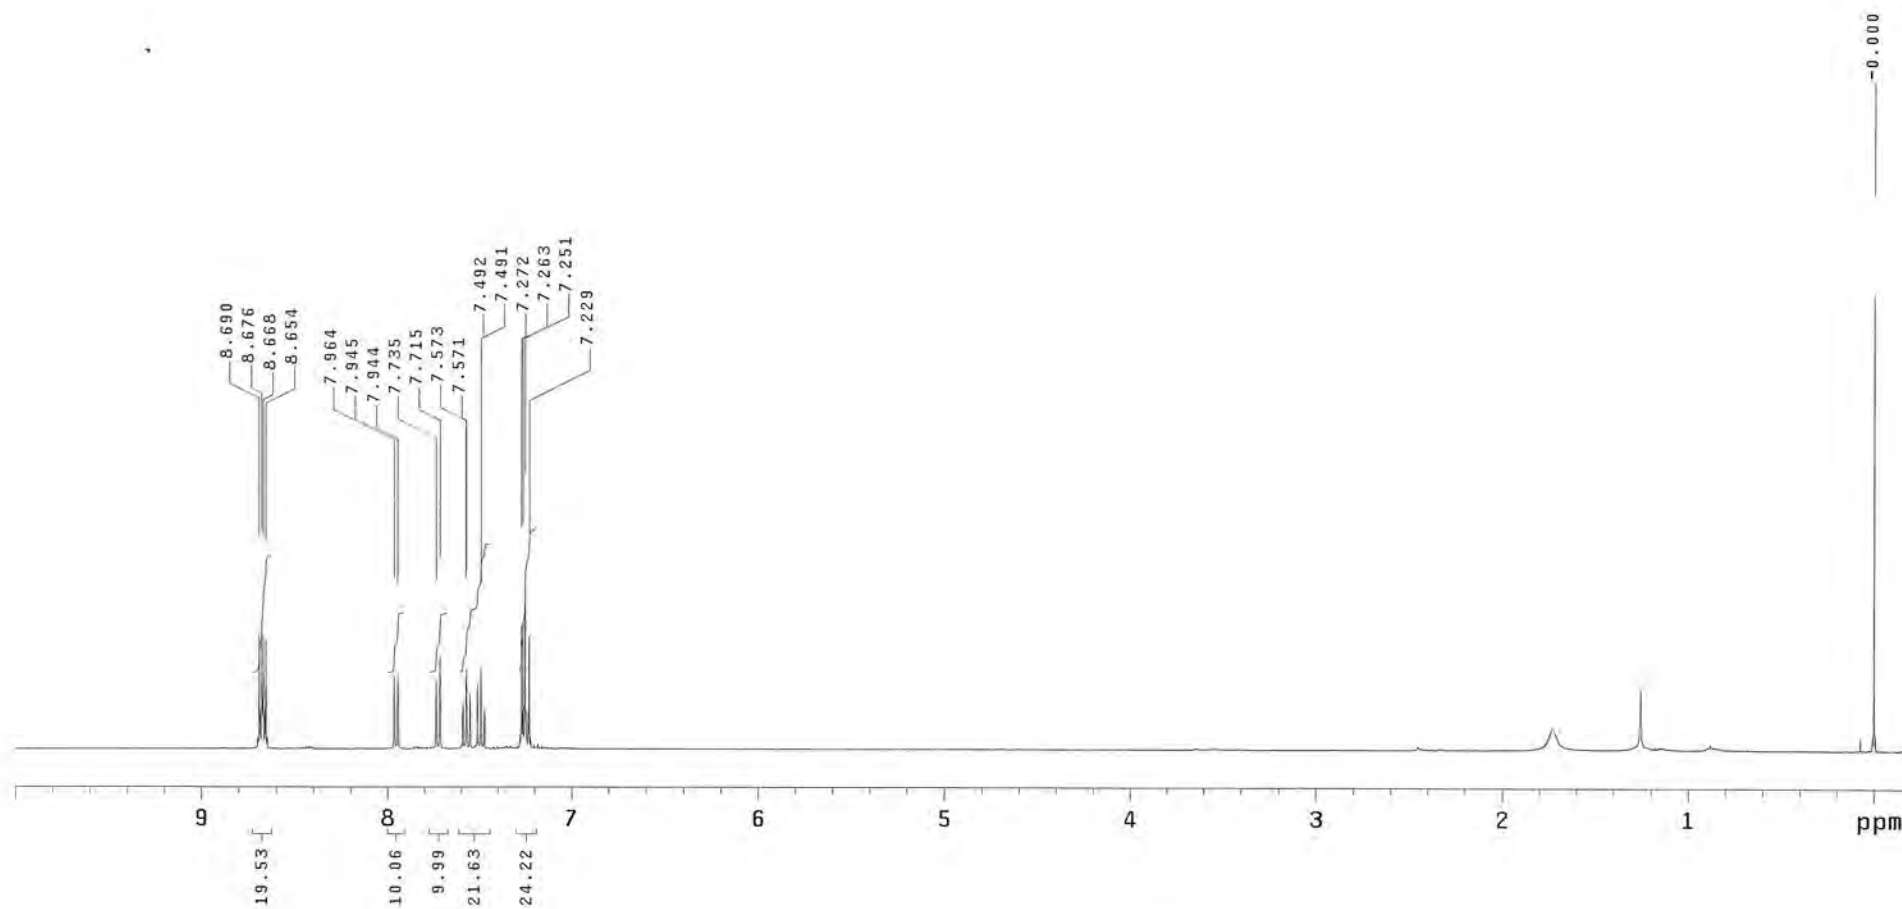

SIVA-RP3-66

Pulse Sequence: s2pu1

Solvent: CDCl3

Ambient temperature

Mercury-400BB "MercuryPlus400"

Pulse 68.7 degrees

Acq. time 1.000 sec

Width 25000.0 Hz

4064 repetitions

OBSERVE C13, 100.6801315 MHz

DECOUPLE H1, 400.3999572 MHz

Power 38 dB

continuously on

WALTZ-16 modulated

DATA PROCESSING

Line broadening 1.0 Hz

FT size 65536

Total time 21 hr, 51 min, 34 sec

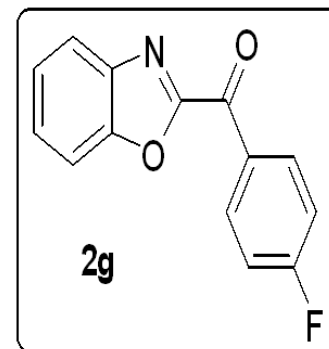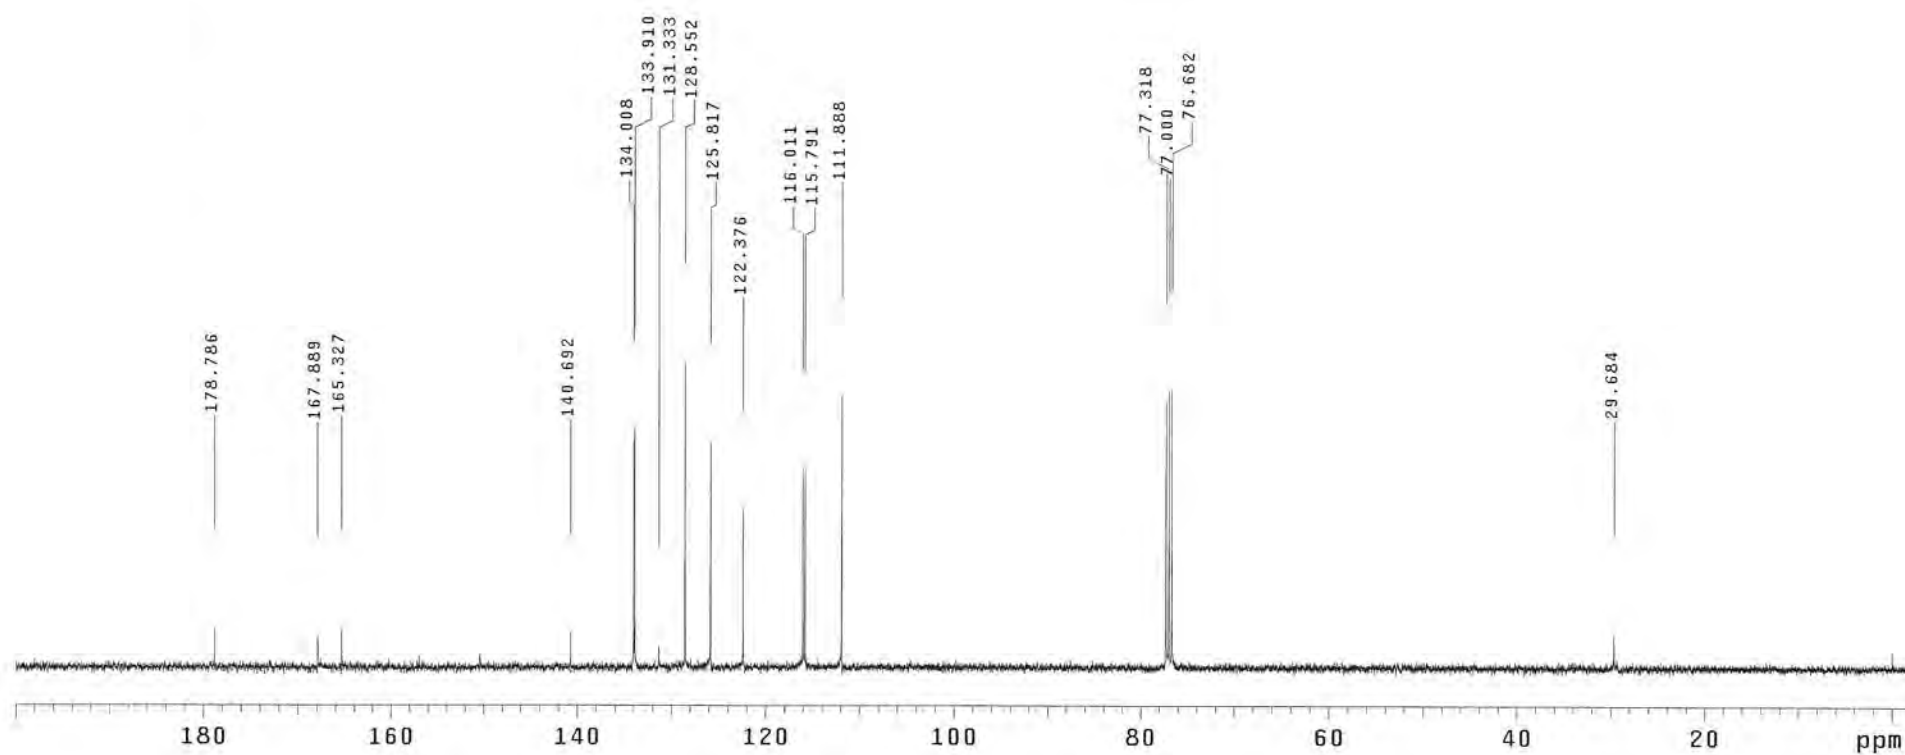

SIVA-RP4-122

Pulse Sequence: s2pul

Mercury-400BB "MercuryPlus400"

Date: Dec 24 2013

Solvent: CDCl3

Ambient temperature

Total 64 repetitions

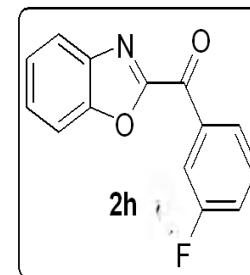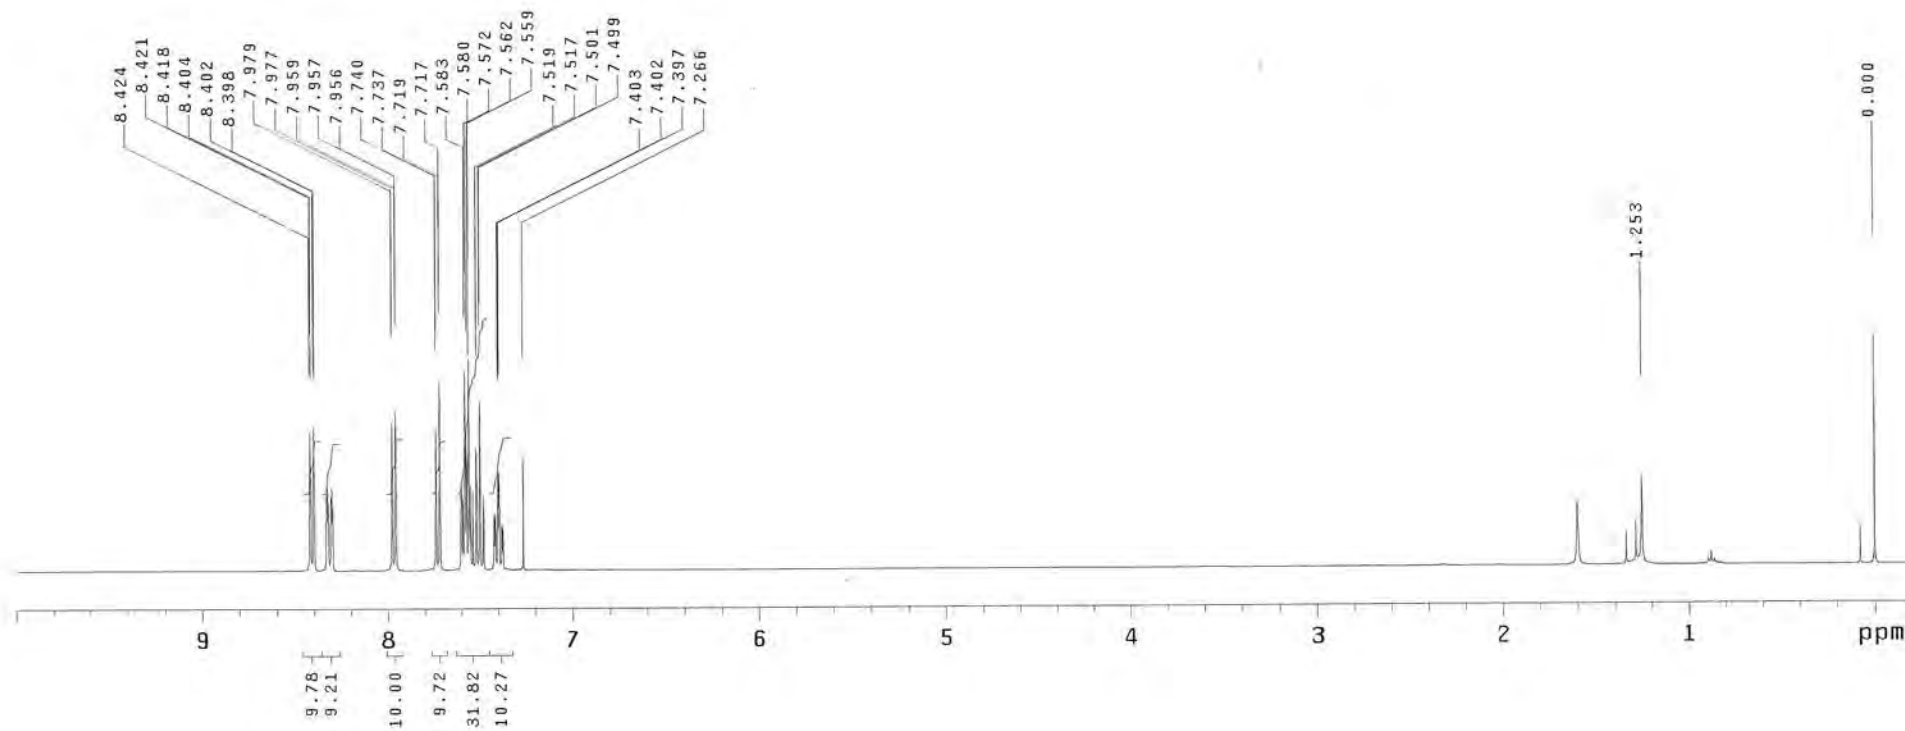

SIVA-RP4-122

Pulse Sequence: s2pul

Mercury-400BB "MercuryPlus400"

Date: Dec 24 2013

Solvent: CDCl<sub>3</sub>

Ambient temperature

Total 4432 repetitions

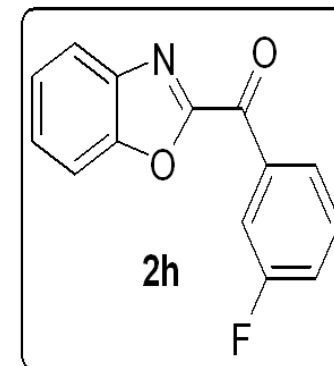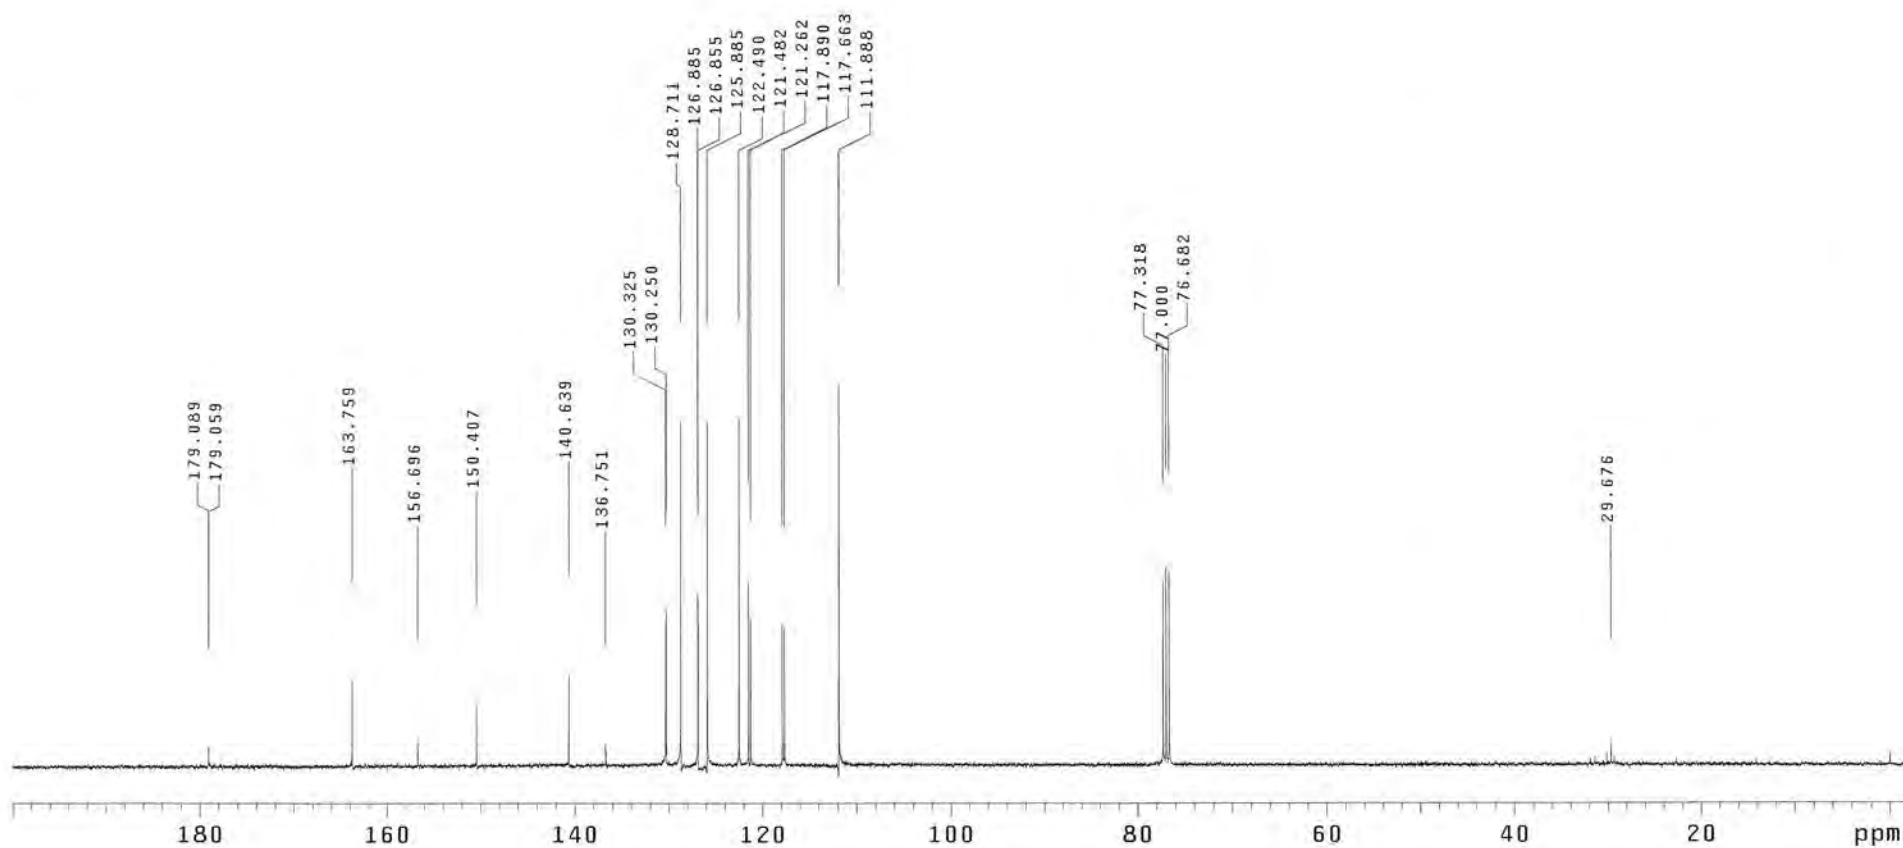



SIVA-RP3-39

Pulse Sequence: s2pu1

Solvent: CDCl3

Ambient temperature

Mercury-400BB "MercuryPlus400"

Pulse 48.1 degrees

Acq. time 4.002 sec

Width 5995.2 Hz

32 repetitions

OBSERVE H1, 400.3978927 MHz

DATA PROCESSING

FT size 65536

Total time 2 min, 33 sec

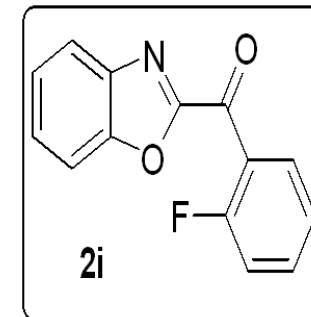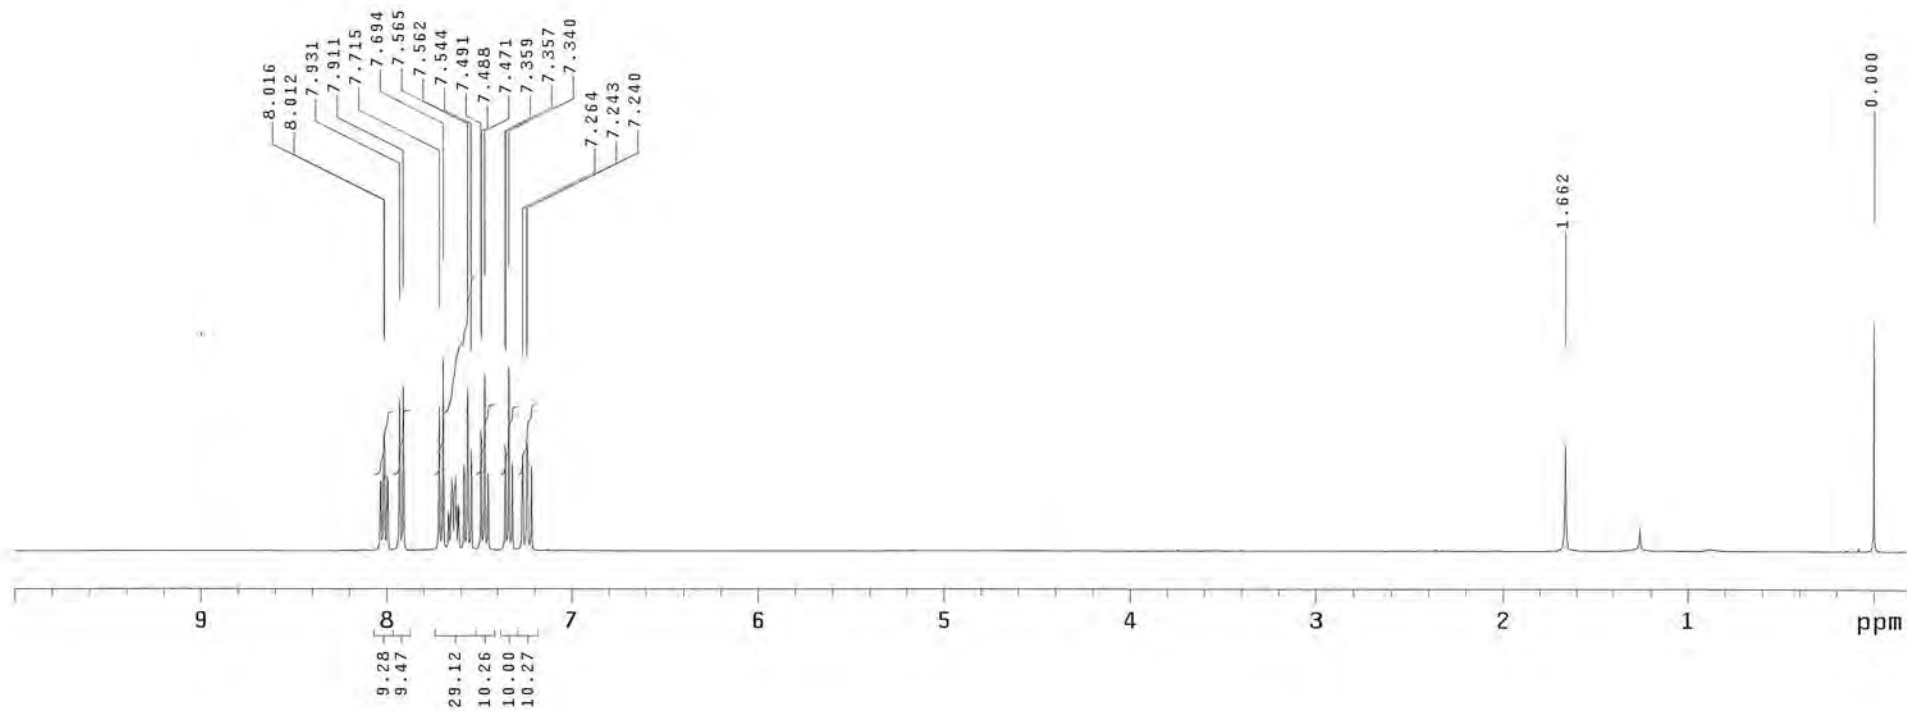

SIVA-RP3-39

Pulse Sequence: s2pul

Solvent: CDCl3

Ambient temperature

Mercury-400BB "MercuryPlus400"

Pulse 68.7 degrees

Acq. time 1.000 sec

Width 25000.0 Hz

2464 repetitions

OBSERVE C13, 100.6801346 MHz

DECOUPLE H1, 400.3999572 MHz

Power 38 dB

continuously on

WALTZ-16 modulated

DATA PROCESSING

Line broadening 1.0 Hz

FT size 65536

Total time 21 hr, 51 min, 34 sec

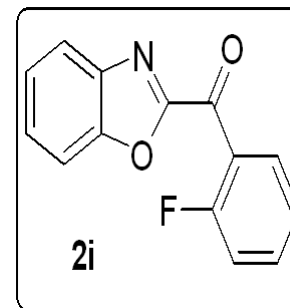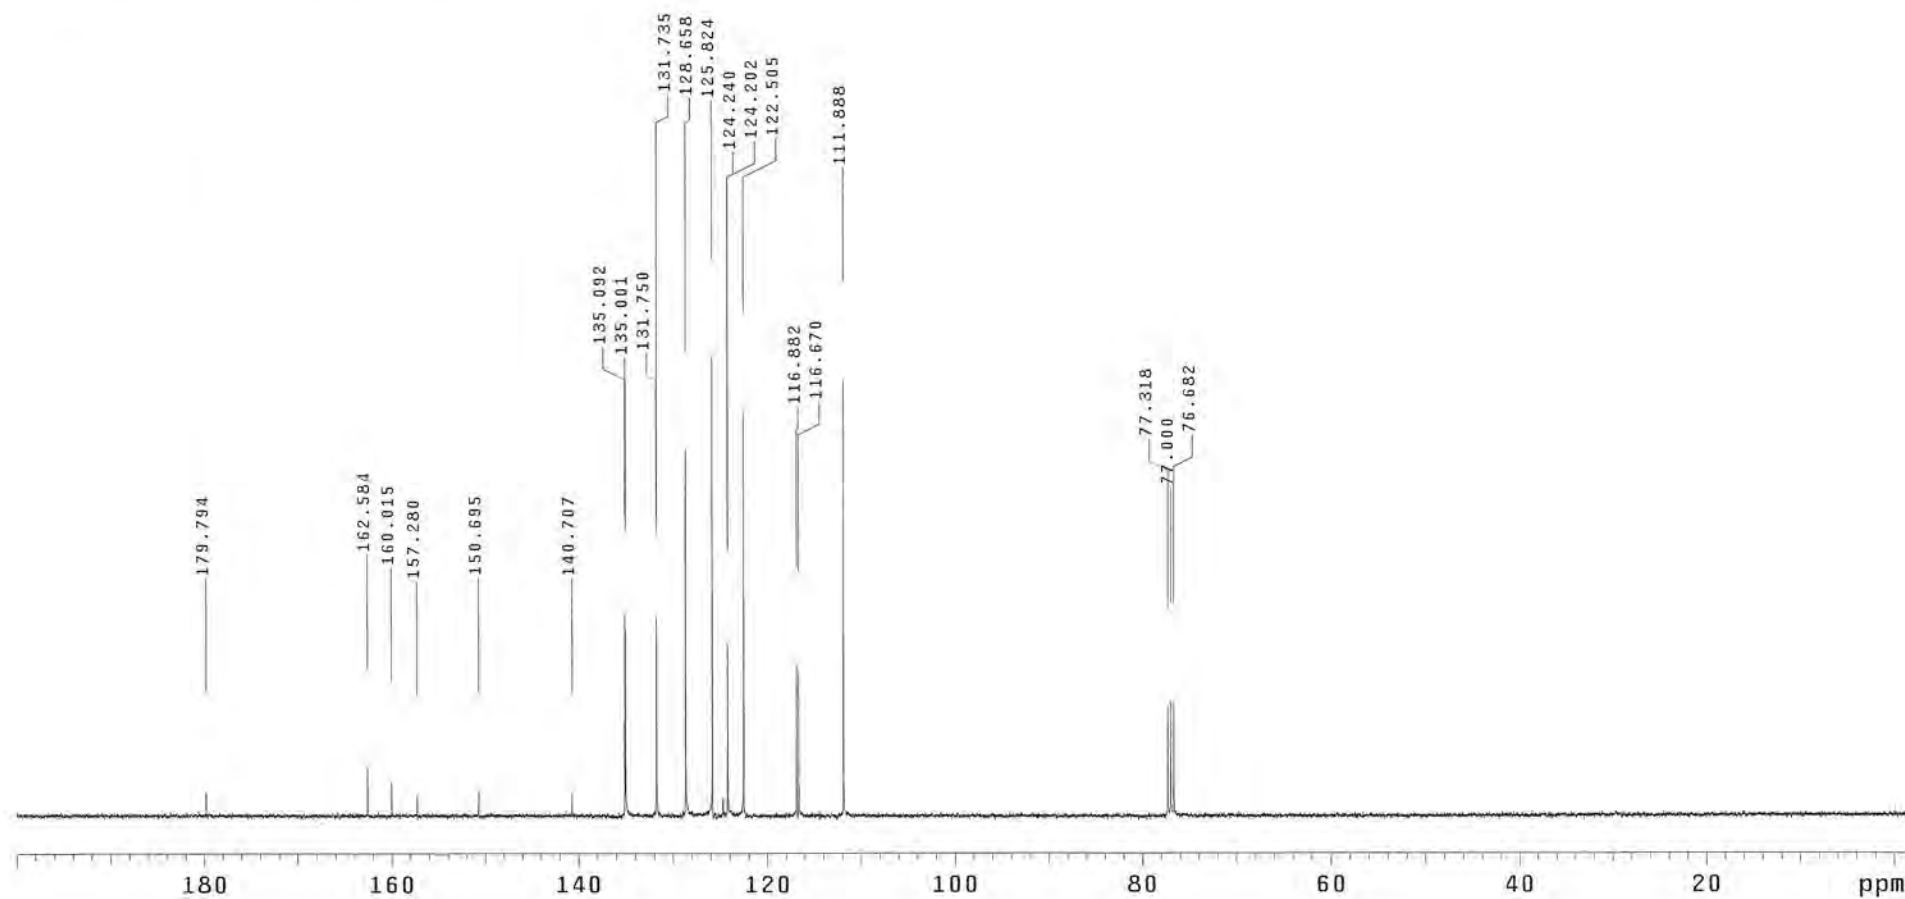

SIVA-RP4-81

Pulse Sequence: s2pu1

Mercury-400BB "MercuryPlus400"

Date: Mar 18 2014

Solvent: CDCl3

Ambient temperature

Total 64 repetitions

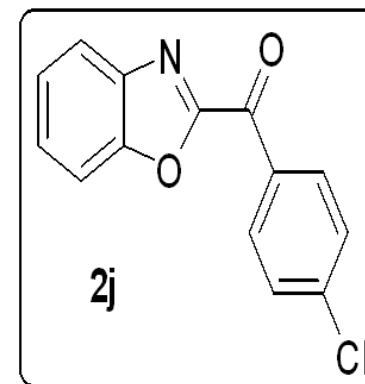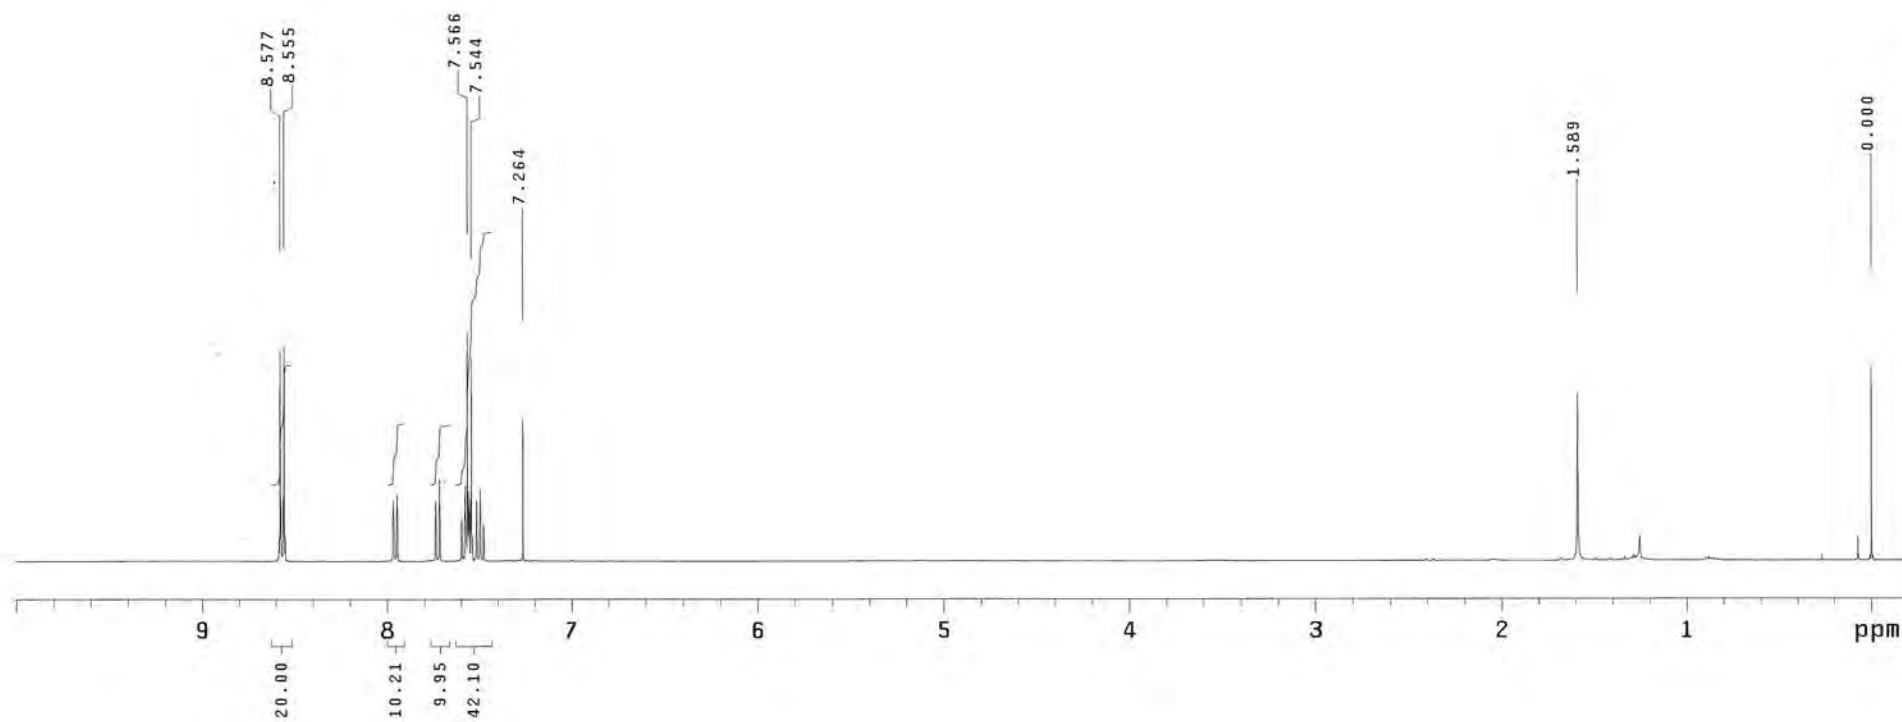

SIVA-RP4-81

Pulse Sequence: s2pu1

Mercury-400BB "MercuryPlus400"

Date: Mar 18 2014

Solvent: CDCl3

Ambient temperature

Total 6160 repetitions

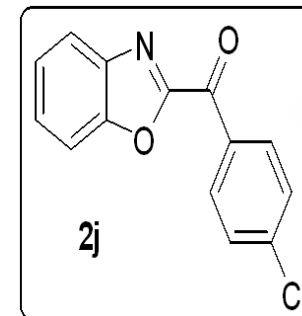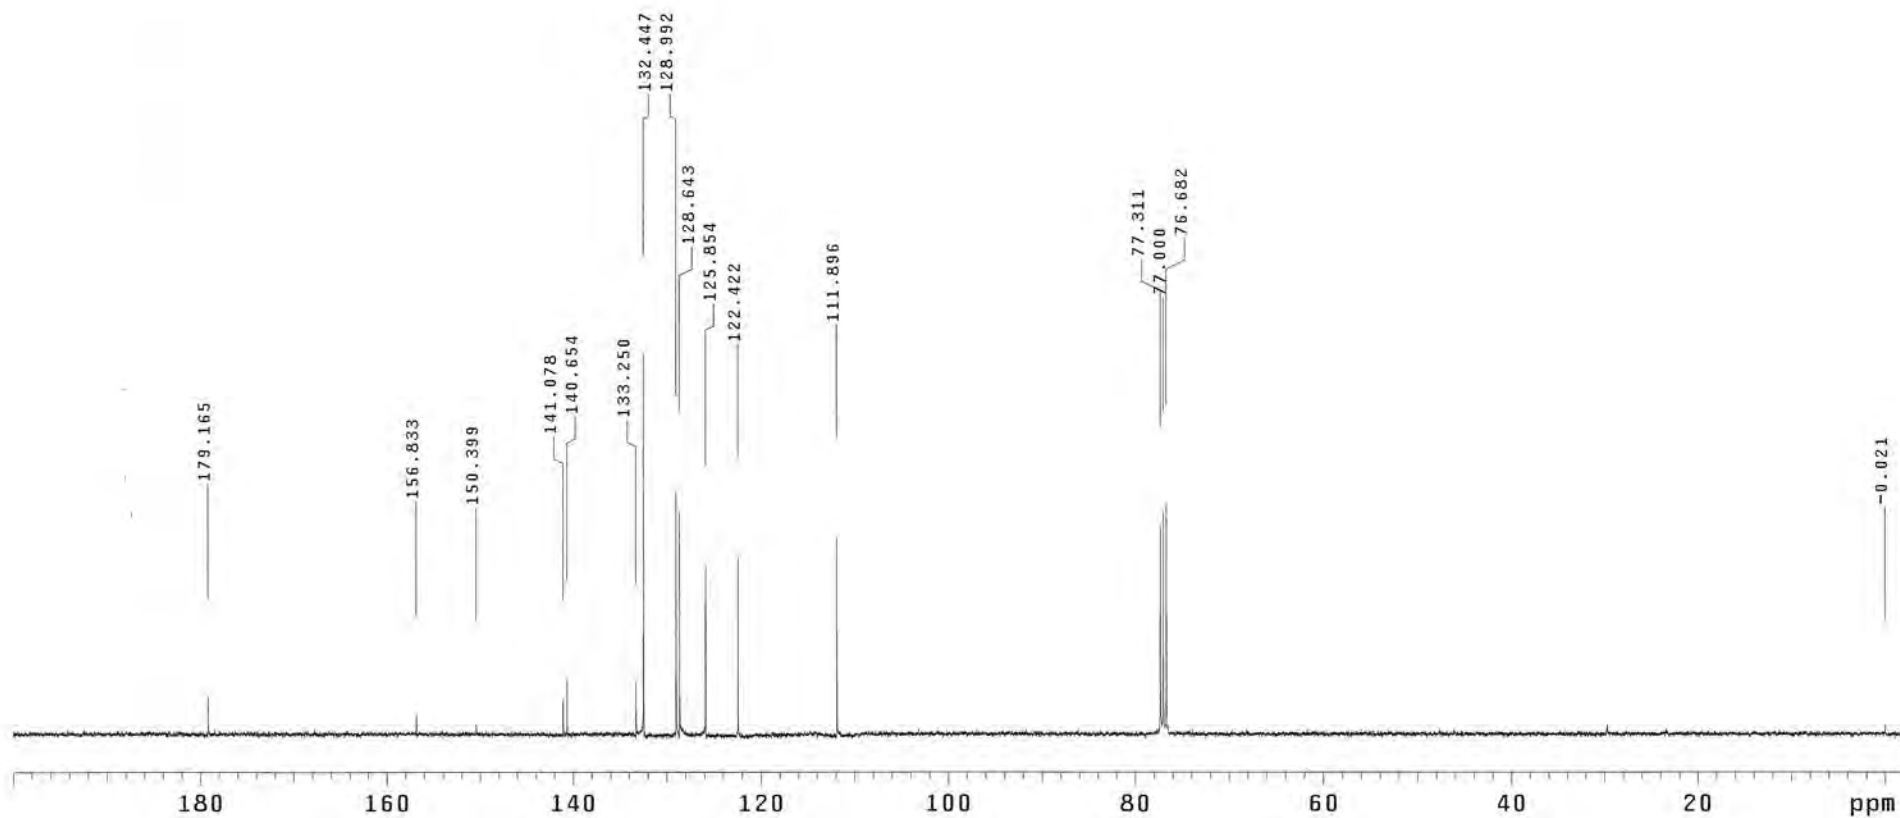

SIVA-RP4-59  
Pulse Sequence: s2pu1  
Solvent: CDCl3  
Ambient temperature  
Mercury-400BB "MercuryPlus400"

Pulse 48.1 degrees  
Acq. time 4.002 sec  
Width 5995.2 Hz  
24 repetitions  
OBSERVE H1, 400.3978943 MHz  
DATA PROCESSING  
FT size 65536  
Total time 5 min, 7 sec

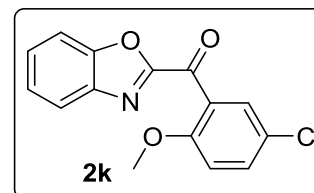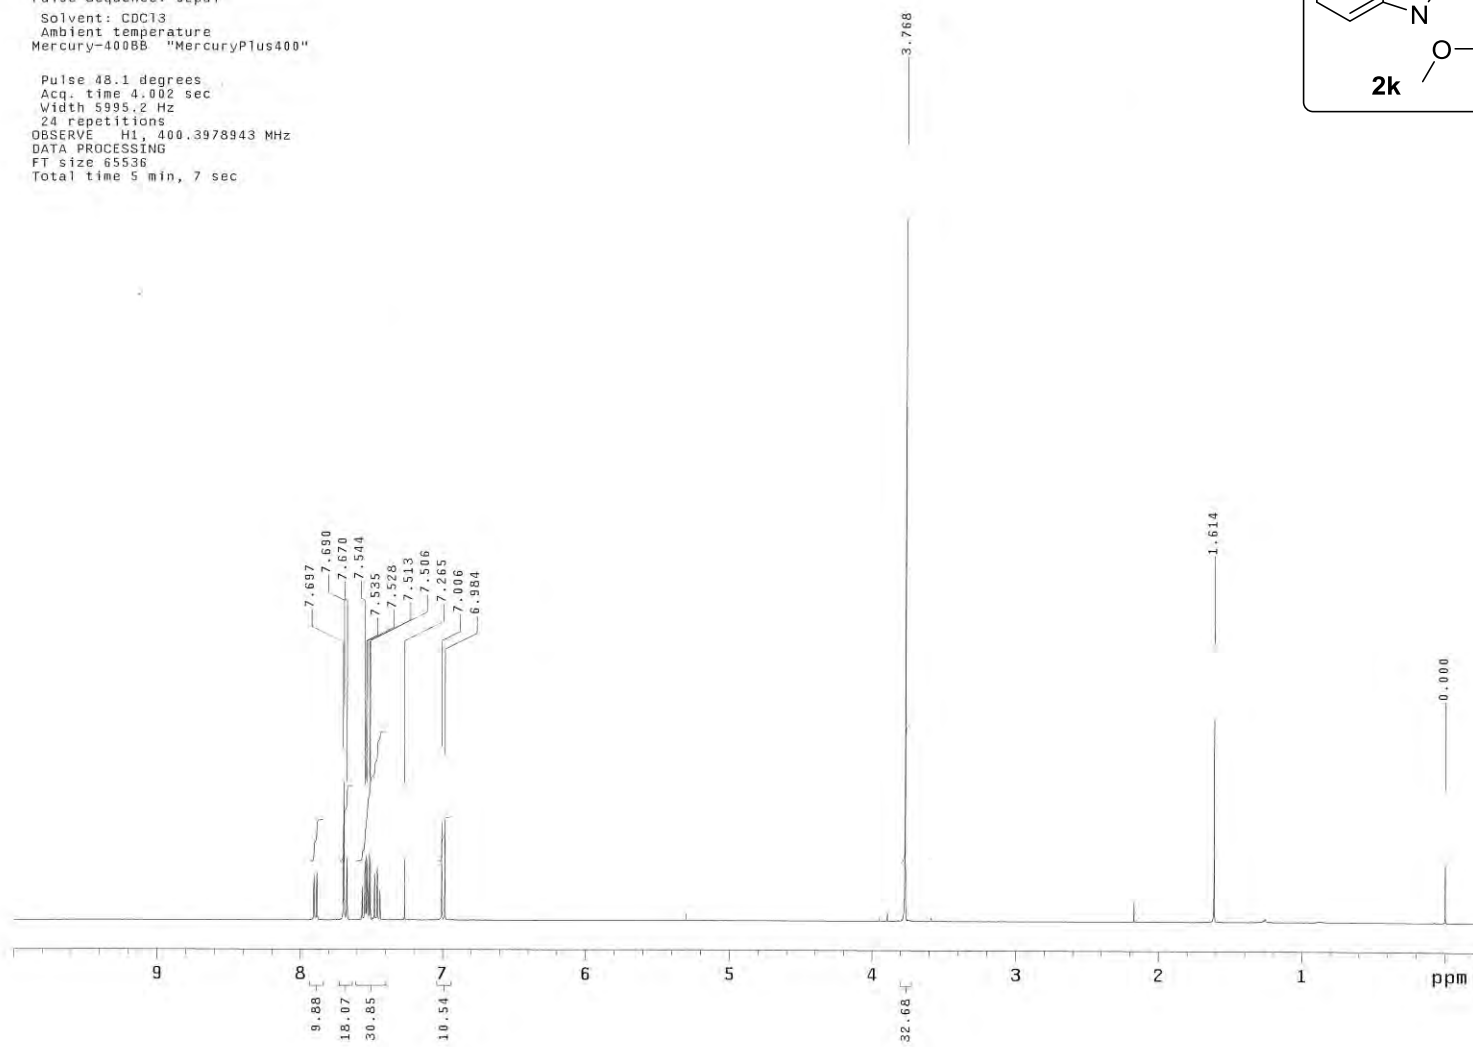

SIVA-RP4-59

Pulse Sequence: s2pul

Solvent: CDCl3

Ambient temperature

Mercury-400BB "MercuryPlus400"

Pulse 68.7 degrees

Acq. time 1.000 sec

Width 25000.0 Hz

7008 repetitions

OBSERVE C13, 100.6801330 MHz

DECOUPLE H1, 400.3999572 MHz

Power 38 dB

continuously on

WALTZ-16 modulated

DATA PROCESSING

Line broadening 1.0 Hz

FT size 65536

Total time 21 hr, 51 min, 34 sec

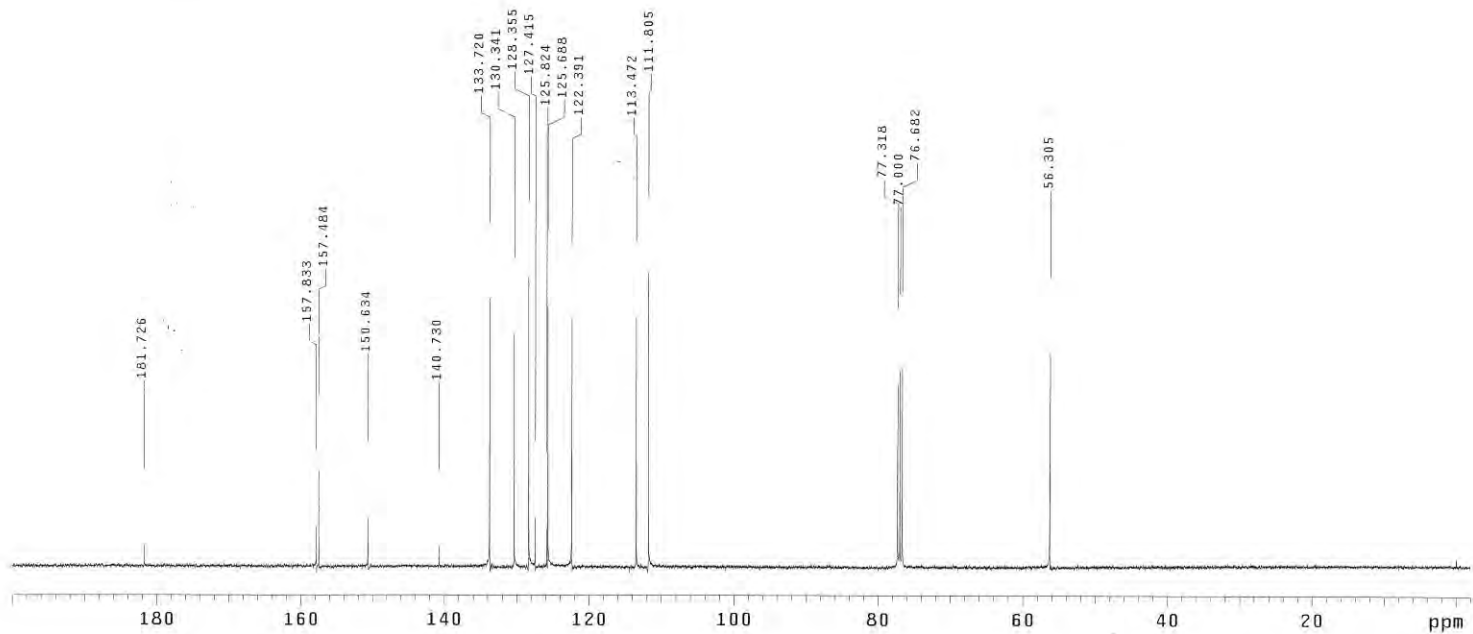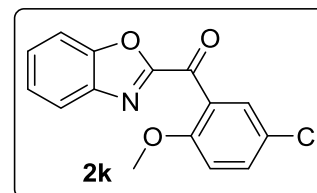

SIVA-RP3-60

Pulse Sequence: s2pu1

Mercury-400BB "MercuryPlus400"

Date: Mar 17 2014

Solvent: CDCl3

Ambient temperature

Total 64 repetitions

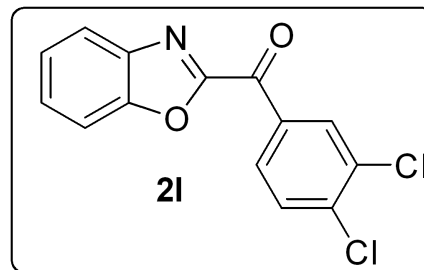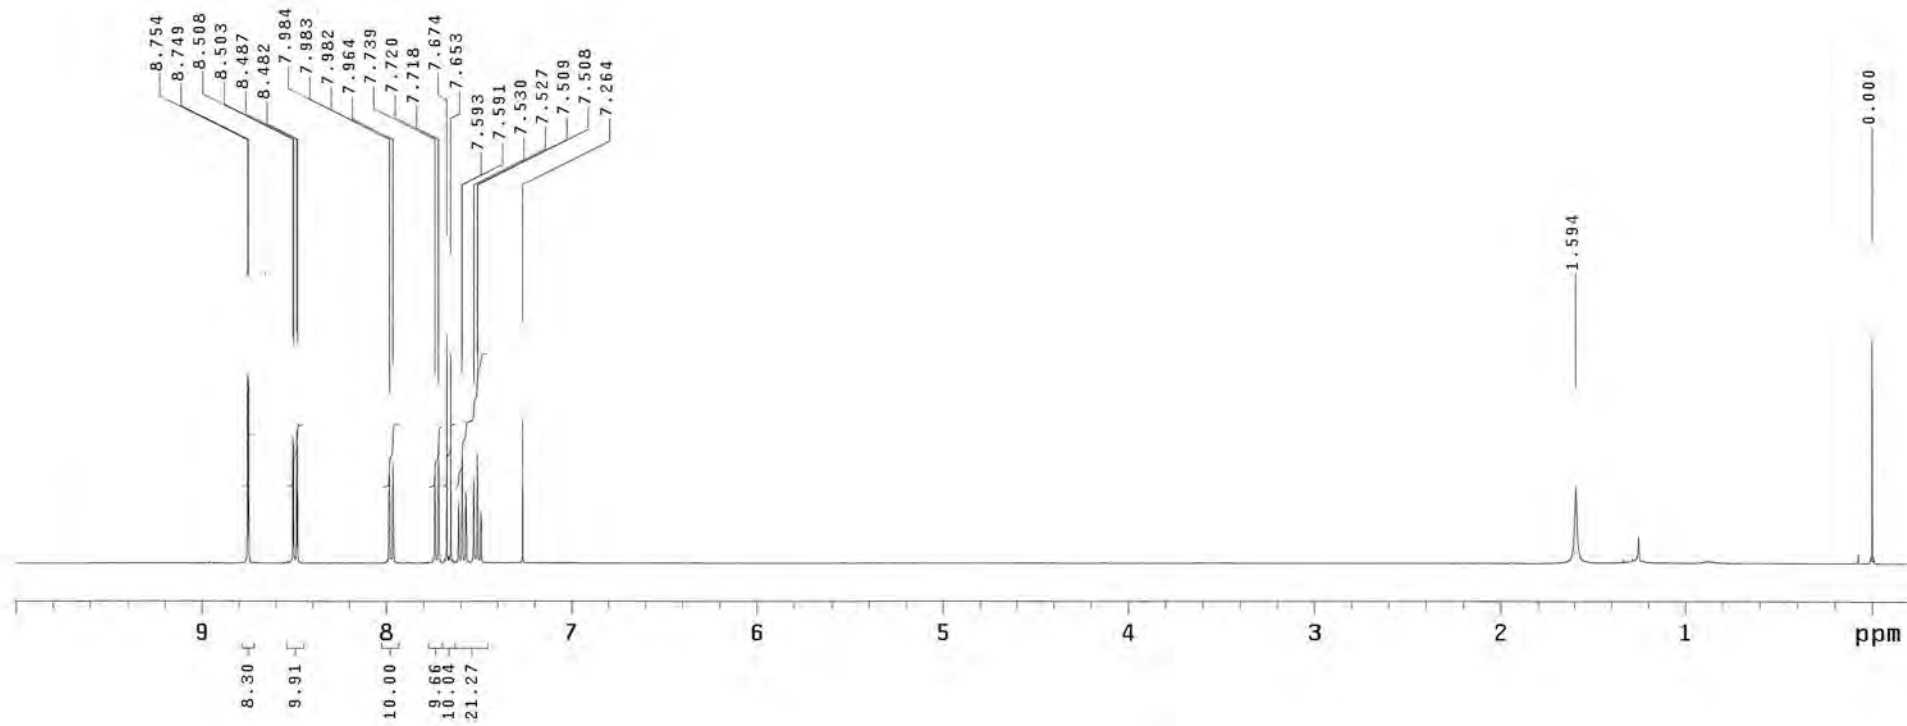

SIVA-RP3-60

Pulse Sequence: s2pu1

Mercury-400BB "MercuryPlus400"

Date: Mar 17 2014

Solvent: CDCl3

Ambient temperature

Total 4752 repetitions

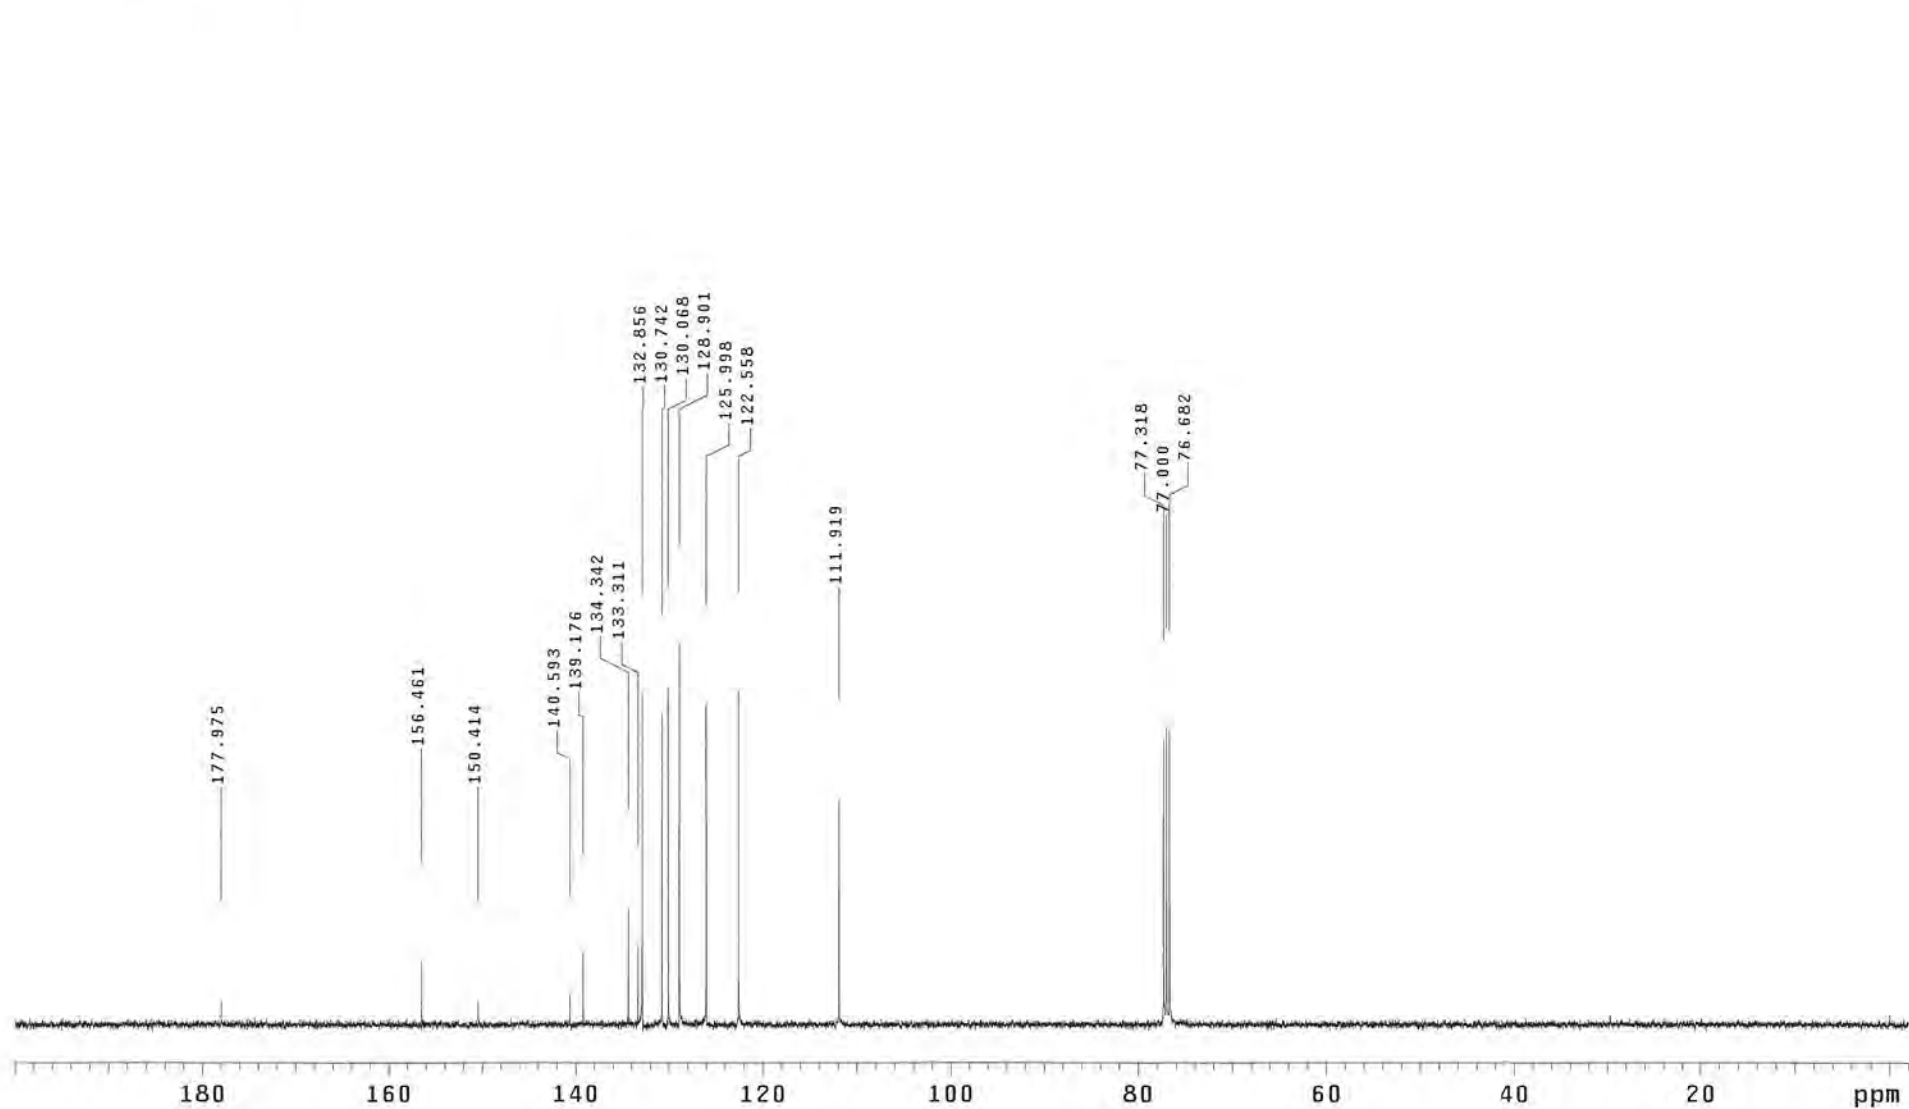



SIVA-RP3-35

Pulse Sequence: s2pu1

Solvent: CDCl3

Ambient temperature

Mercury-400BB "MercuryPlus400"

Pulse 48.1 degrees

Acq. time 4.002 sec

Width 5995.2 Hz

24 repetitions

OBSERVE H1, 400.3978969 MHz

DATA PROCESSING

FT size 65536

Total time 5 min, 7 sec

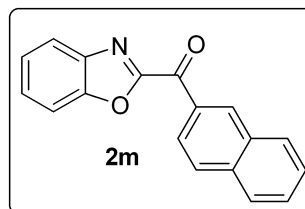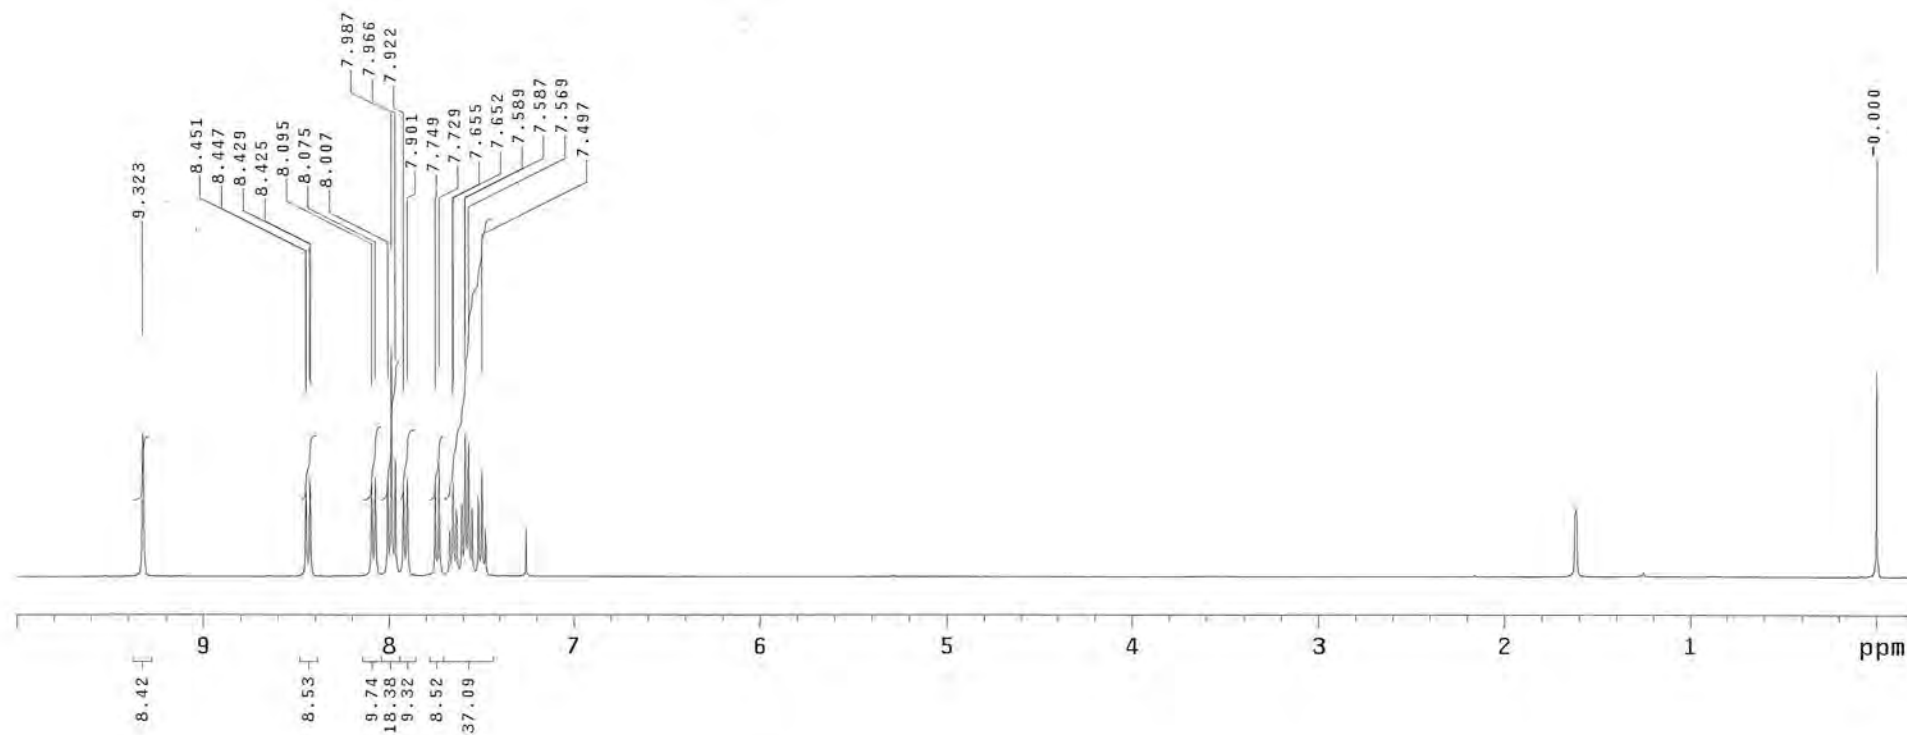

SIVA-RP3-35

Pulse Sequence: s2pu1

Solvent: CDC13  
Ambient temperature  
Mercury-400BB "MercuryPlus400"

Pulse 68.7 degrees  
Acq. time 1.000 sec  
Width 25000.0 Hz  
2144 repetitions  
OBSERVE C13, 100.6801338 MHz  
DECOUPLE H1, 400.3999572 MHz  
Power 38 dB  
continuously on  
WALTZ-16 modulated  
DATA PROCESSING  
Line broadening 1.0 Hz  
FT size 65536  
Total time 21 hr, 51 min, 34 sec

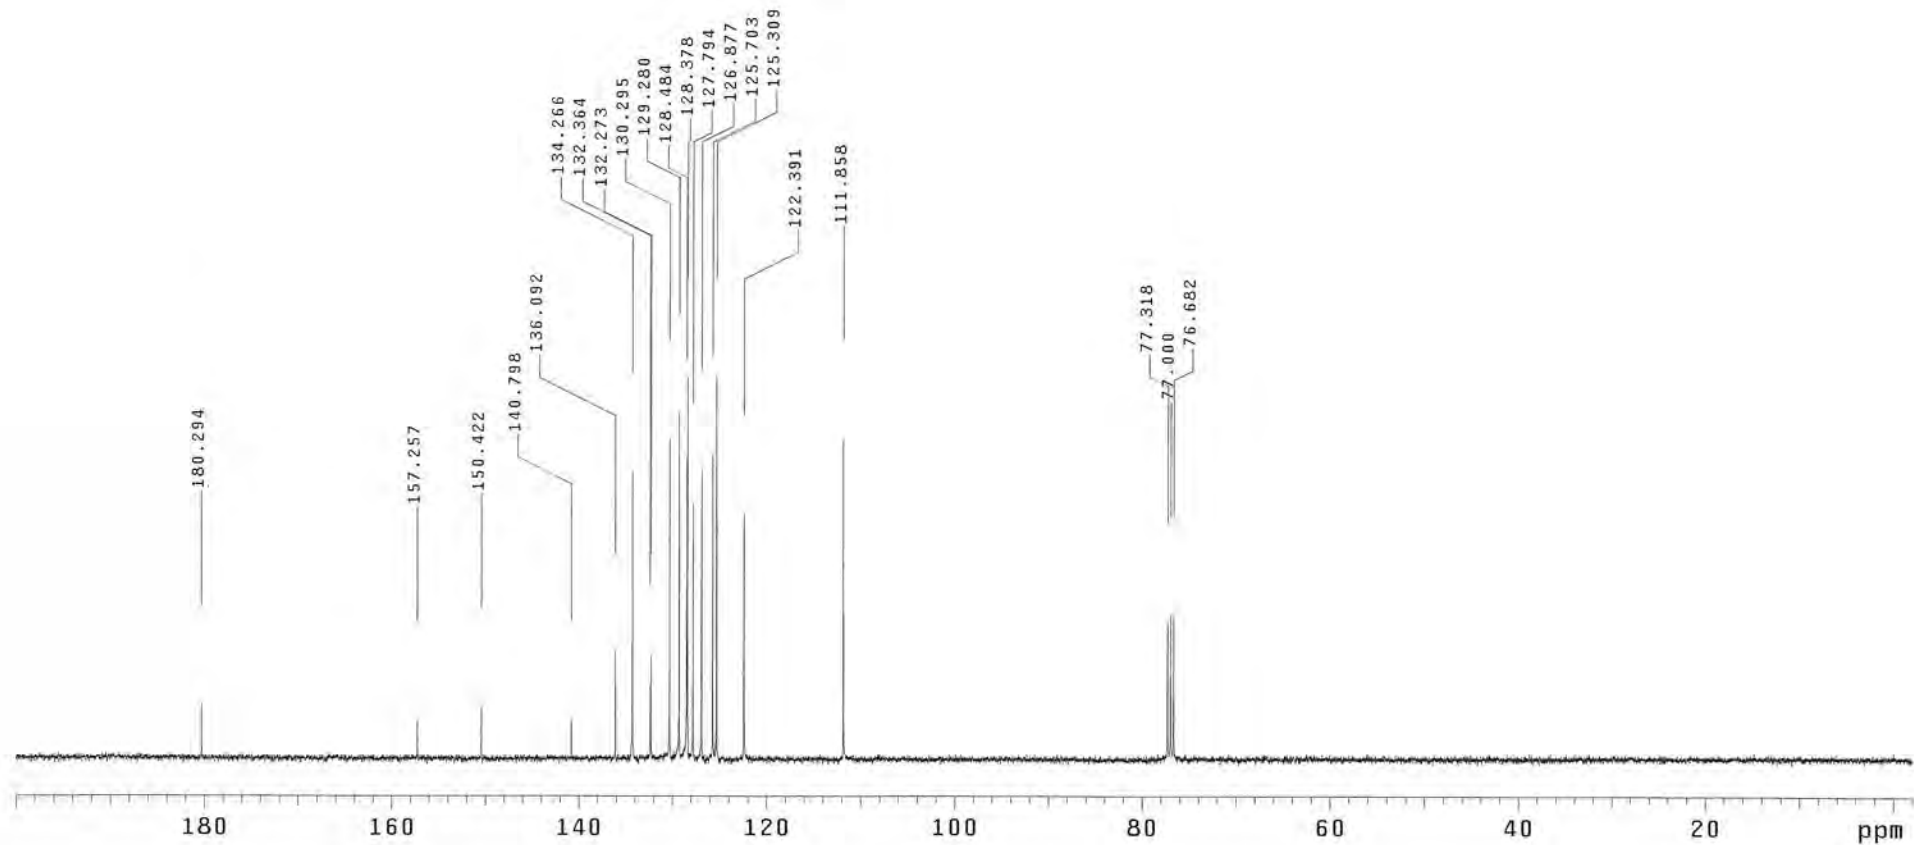

SIVA-RP3-33

Pulse Sequence: s2pu1

UNITYplus-400 "unity400"

Date: Oct 16 2013

Solvent: CDCl<sub>3</sub>

Ambient temperature

Total 56 repetitions

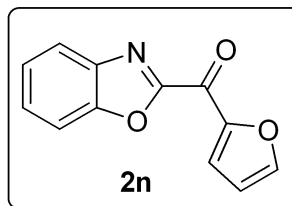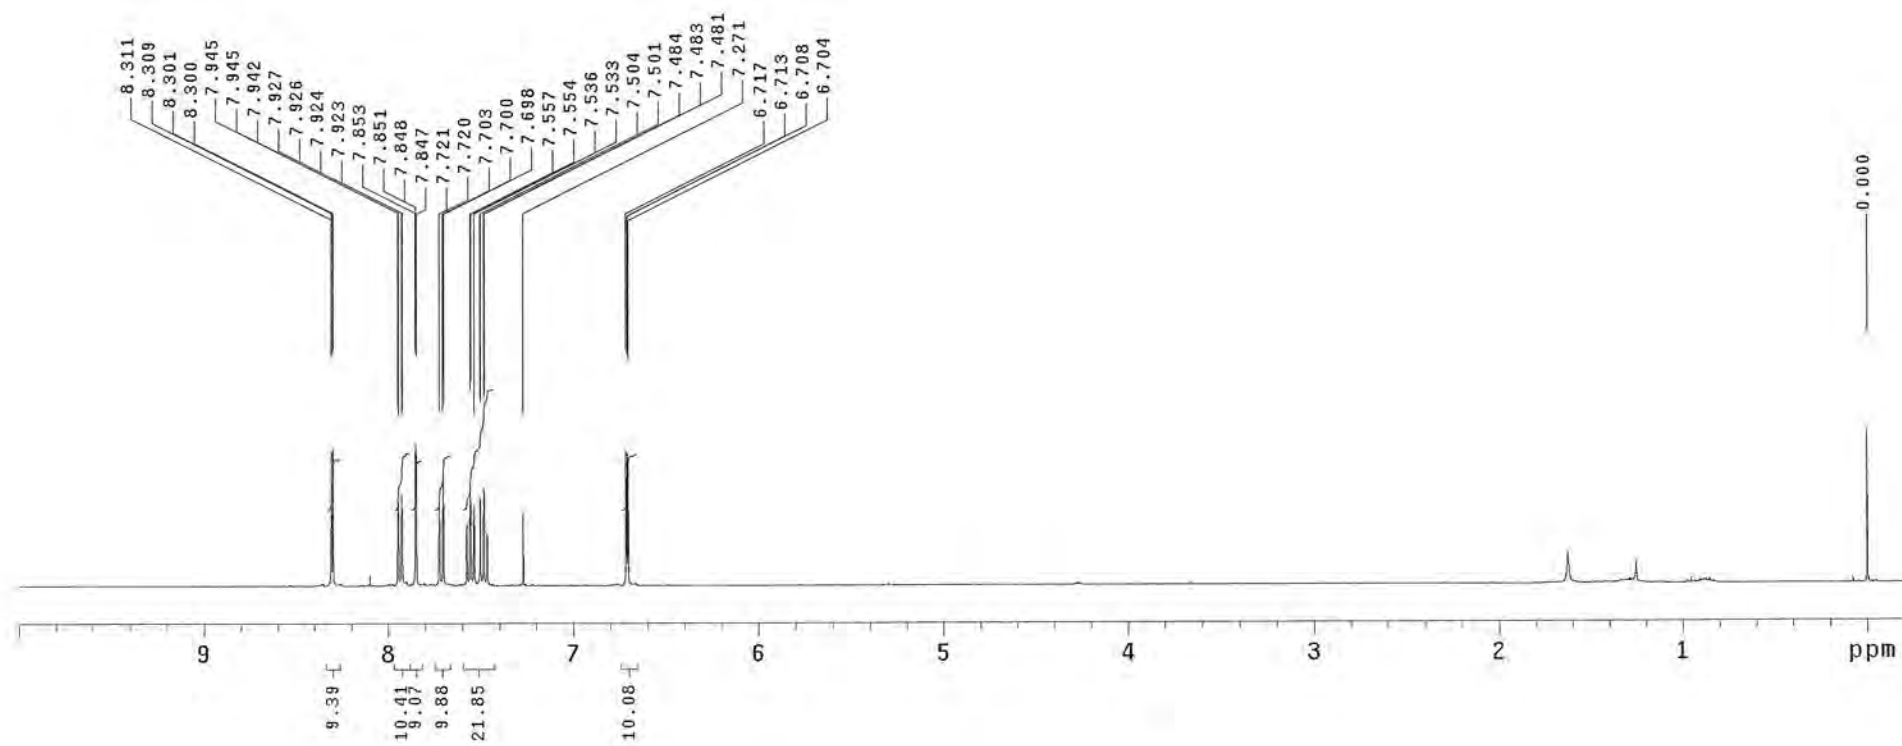

SIVA-RP3-33

Pulse Sequence: s2pu1

UNITYplus-400 "unity400"

Date: Oct 16 2013

Solvent: CDCl3

Ambient temperature

Total 5504 repetitions

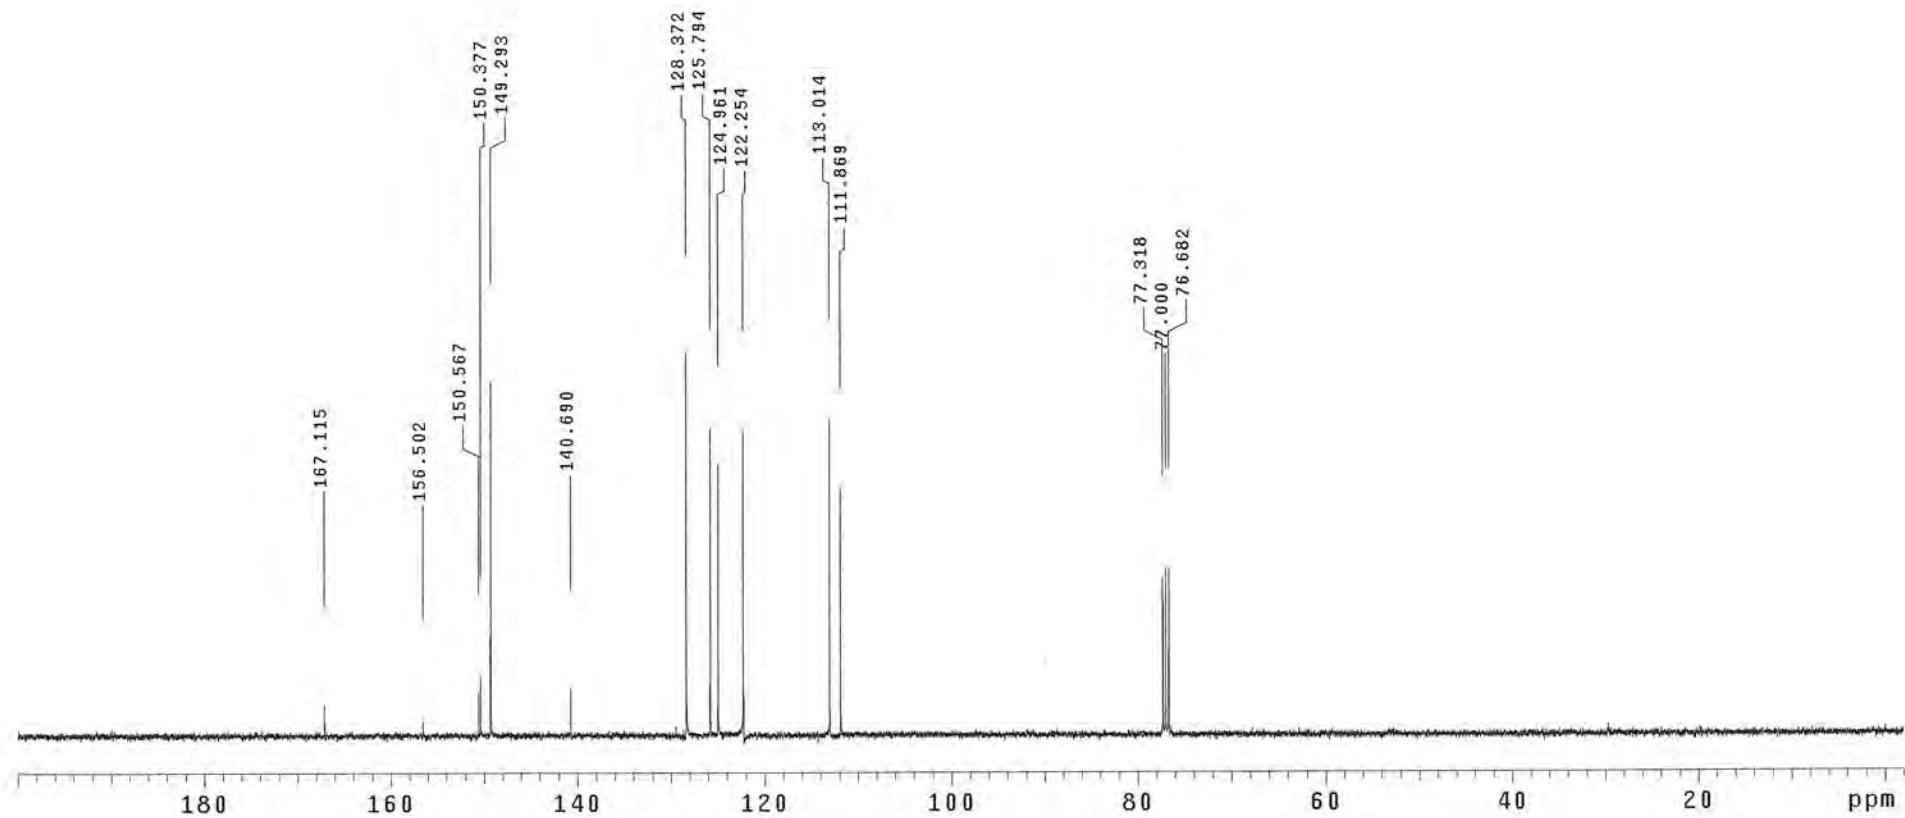

SIVA-RP3-47

Pulse Sequence: s2pu1

Mercury-400BB "MercuryPlus400"

Date: Mar 17 2014

Solvent: CDCl<sub>3</sub>

Ambient temperature

Total 64 repetitions

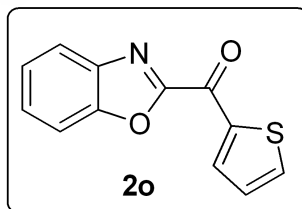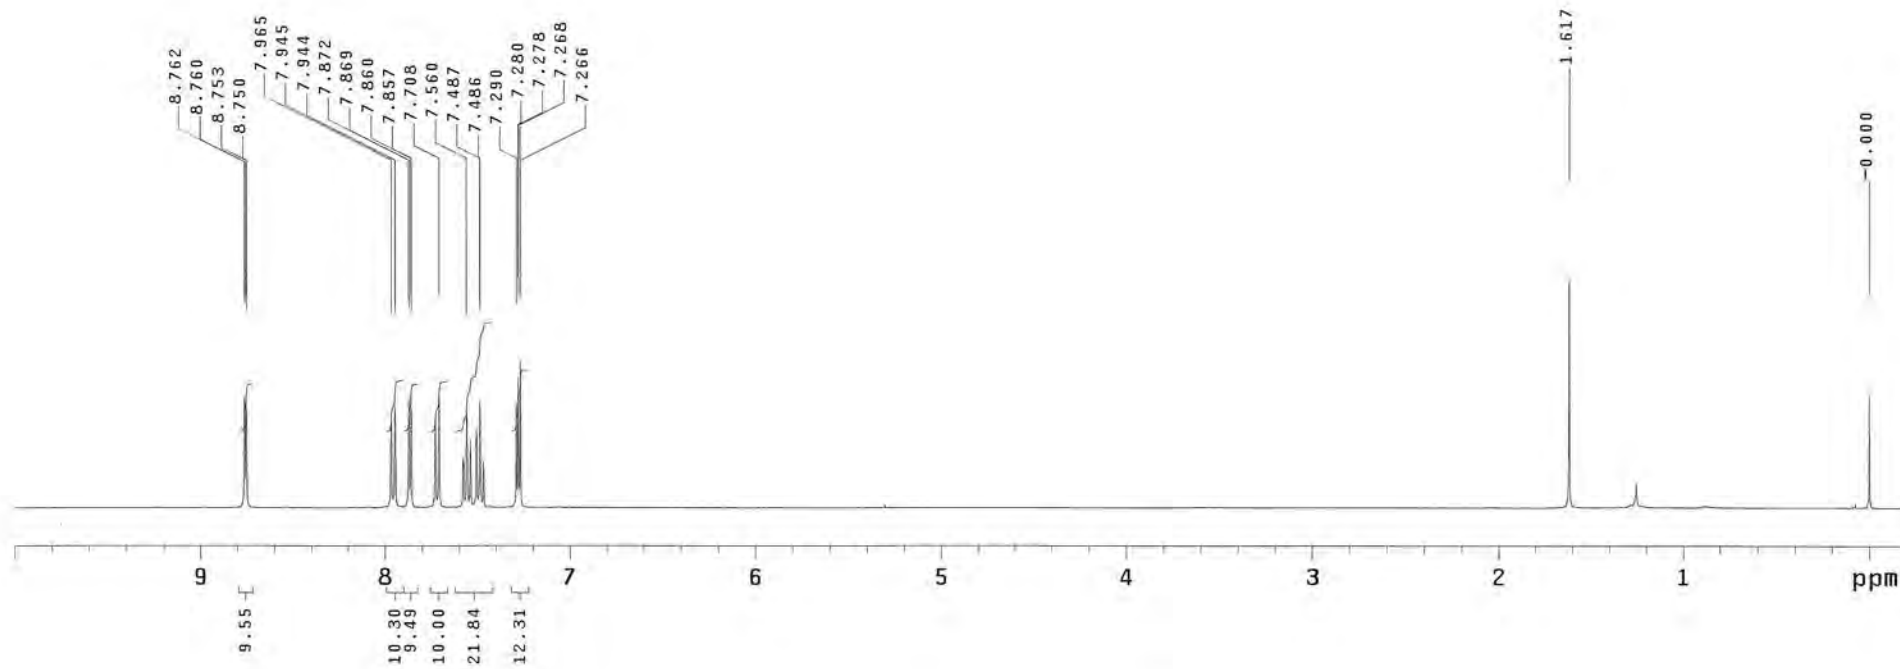

SIVA-RP3-47

Pulse Sequence: s2pul

Mercury-400BB "MercuryPlus400"

Date: Mar 17 2014

Solvent: CDCl3

Ambient temperature

Total 4400 repetitions

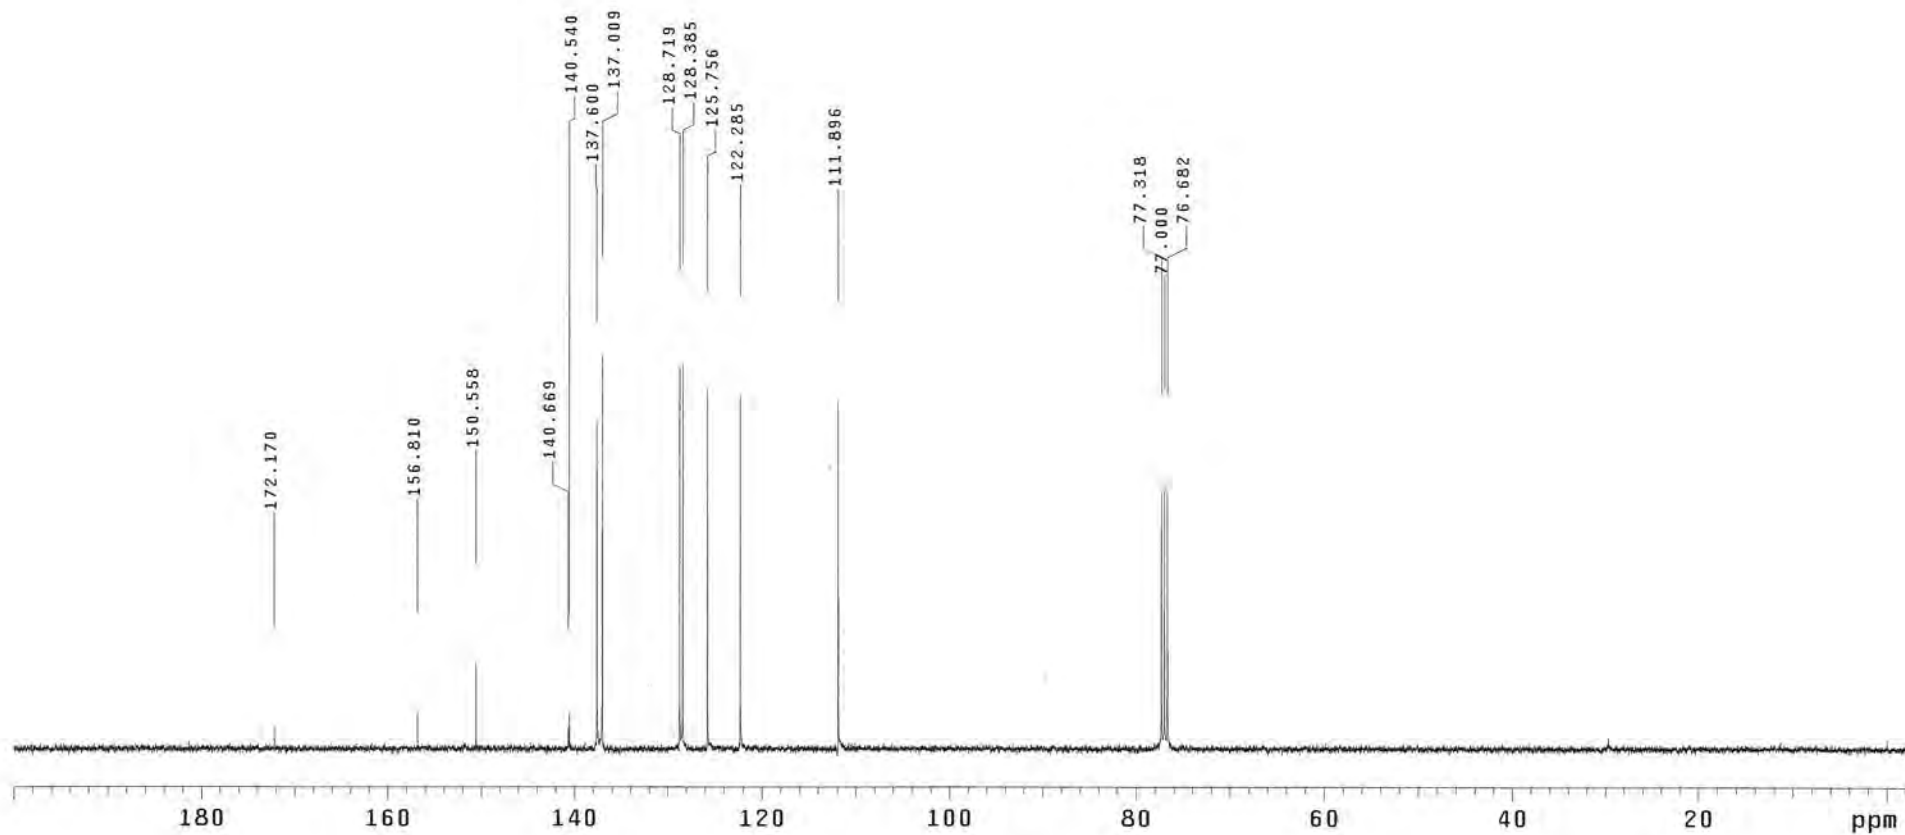

SIVA-RP3-77

Pulse Sequence: s2pul

Mercury-400BB "MercuryPlus400"

Date: Mar 18 2014

Solvent: CDCl3

Ambient temperature

Total 32 repetitions

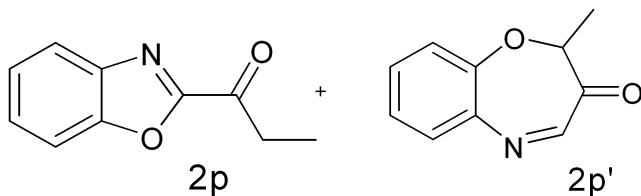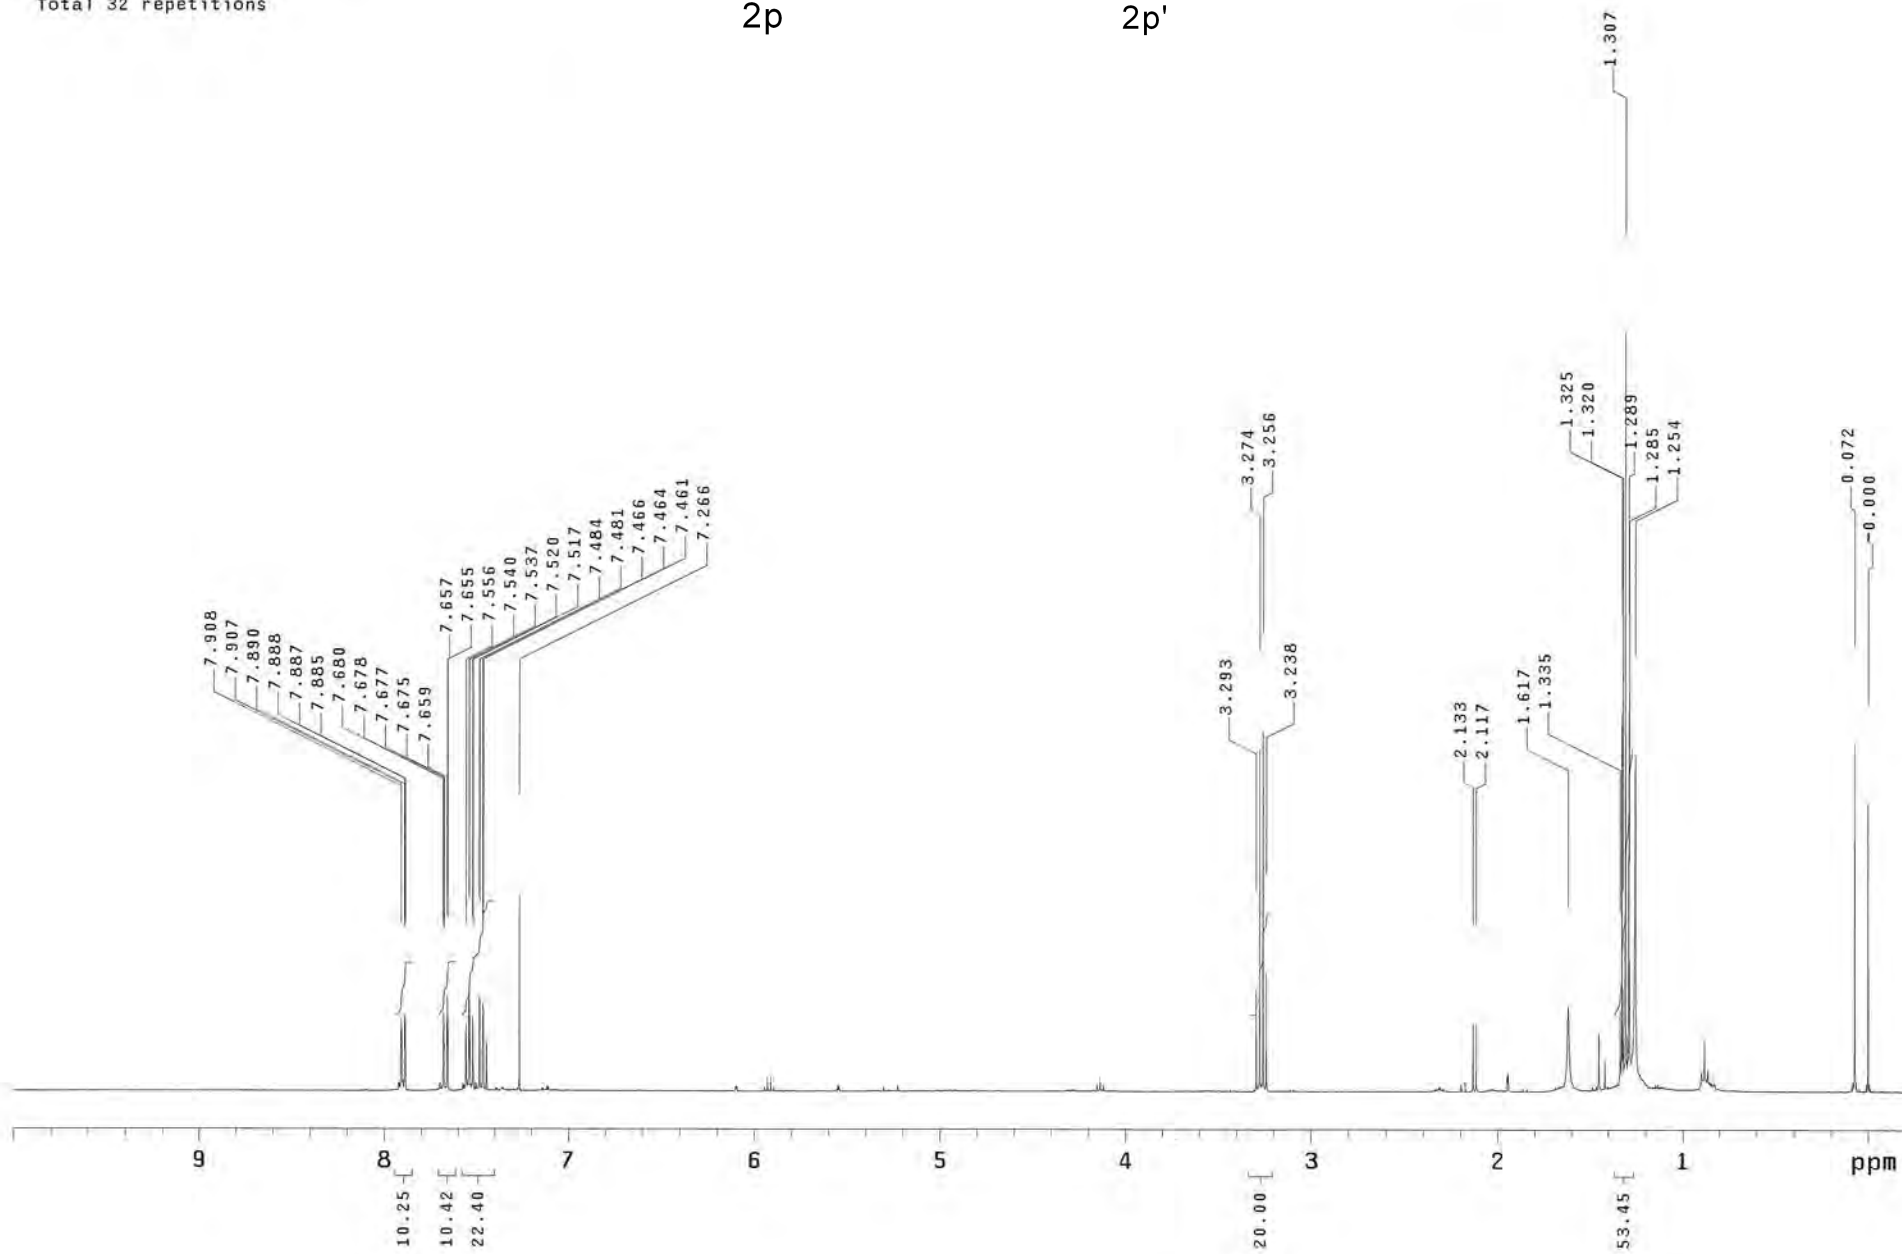

SIVA-RP3-77

Pulse Sequence: s2pu1

Mercury-400BB "MercuryPlus400"

Date: Mar 17 2014

Solvent: CDCl3

Ambient temperature

Total 62672 repetitions

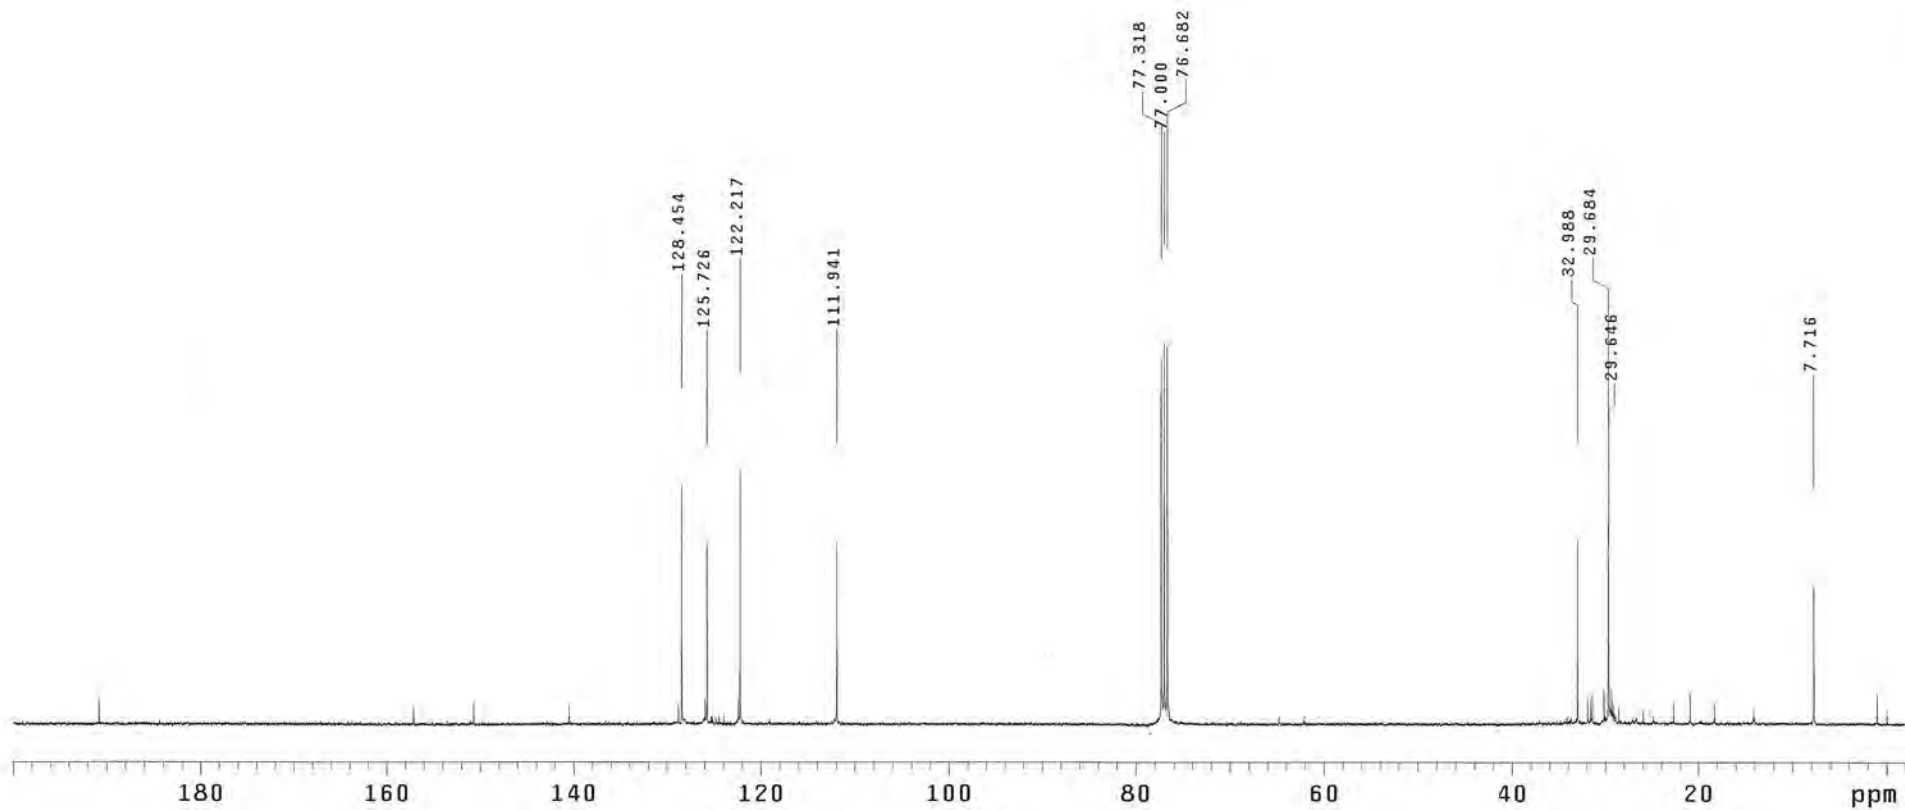



SIVA-RP3-127

Pulse Sequence: s2pu1

UNITYplus-400 "unity400"

Date: Oct 14 2013

Solvent: CDCl3

Ambient temperature

Total 64 repetitions

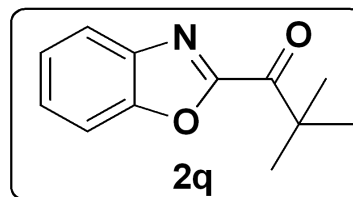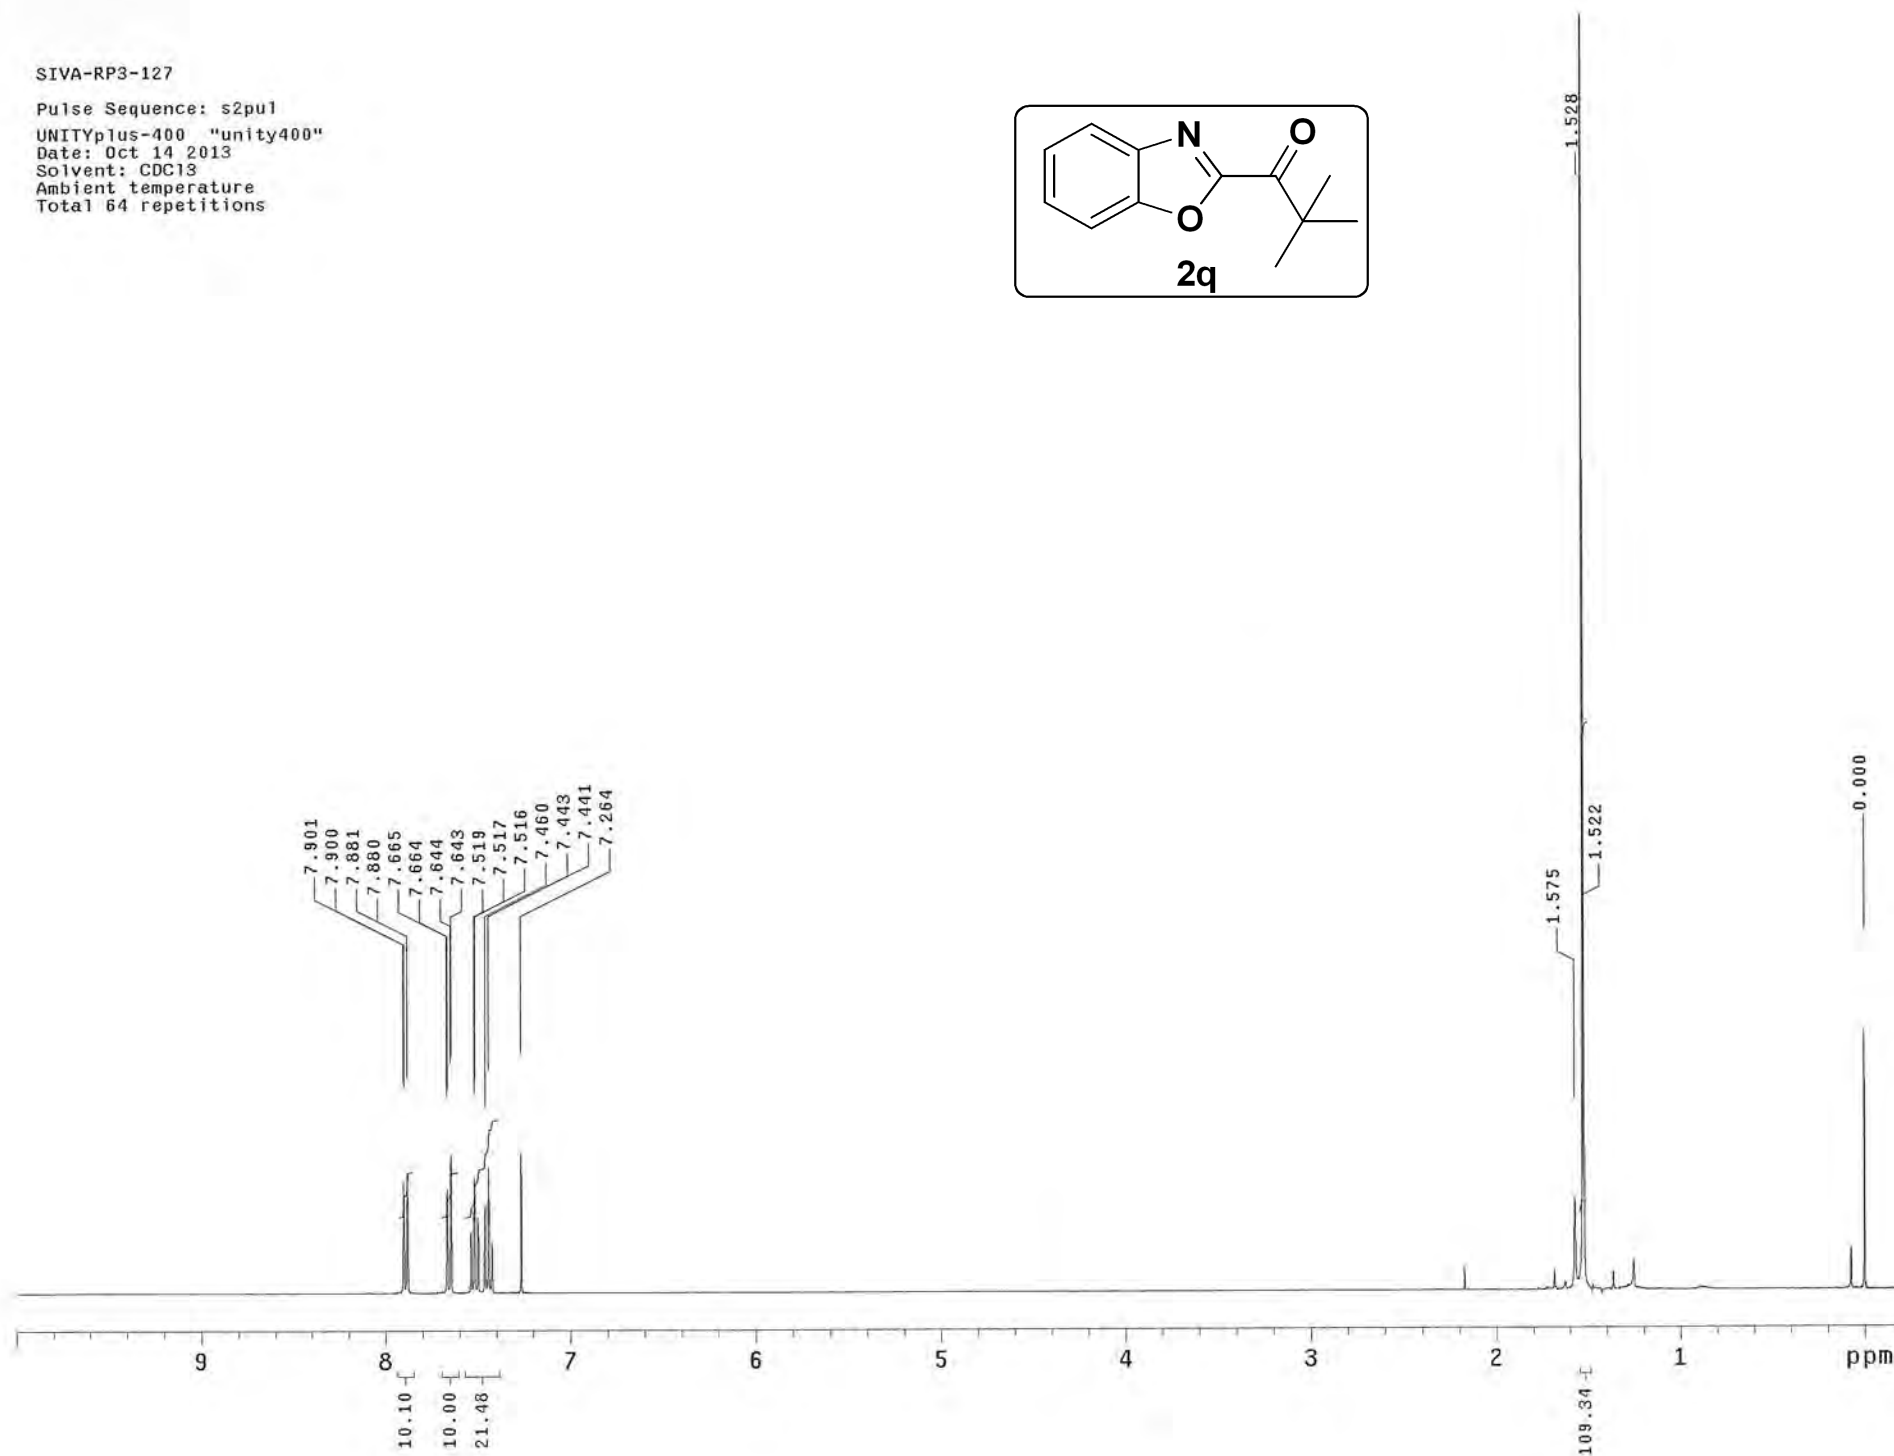

SIVA-RP3-127

Pulse Sequence: s2pu1

UNITYplus-400 "unity400"

Date: Oct 14 2013

Solvent: CDCl3

Ambient temperature

Total 3760 repetitions

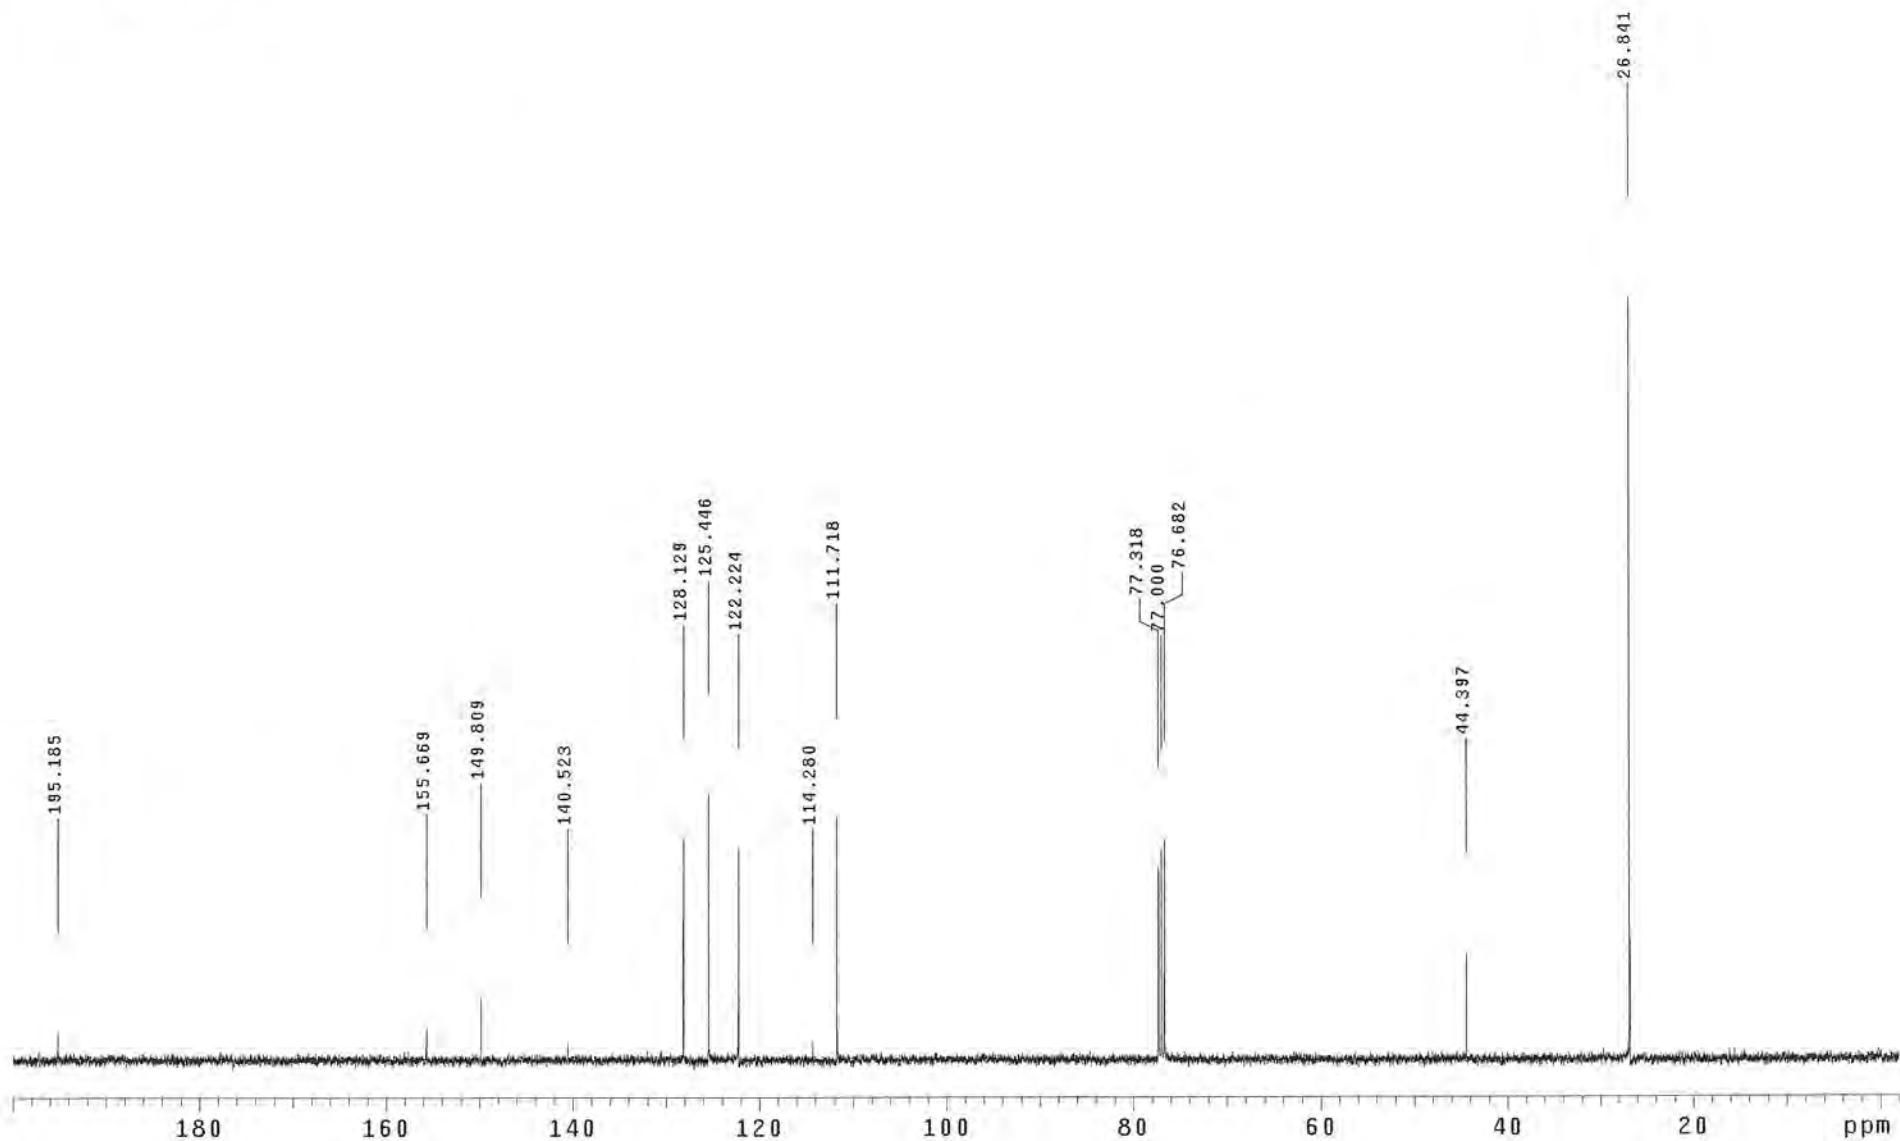

SIVA-RP4-158

Pulse Sequence: s2pu1

Mercury-400BB "MercuryPlus400"

Date: Mar 3 2014

Solvent: CDCl3

Ambient temperature

Total 32 repetitions

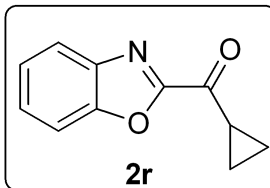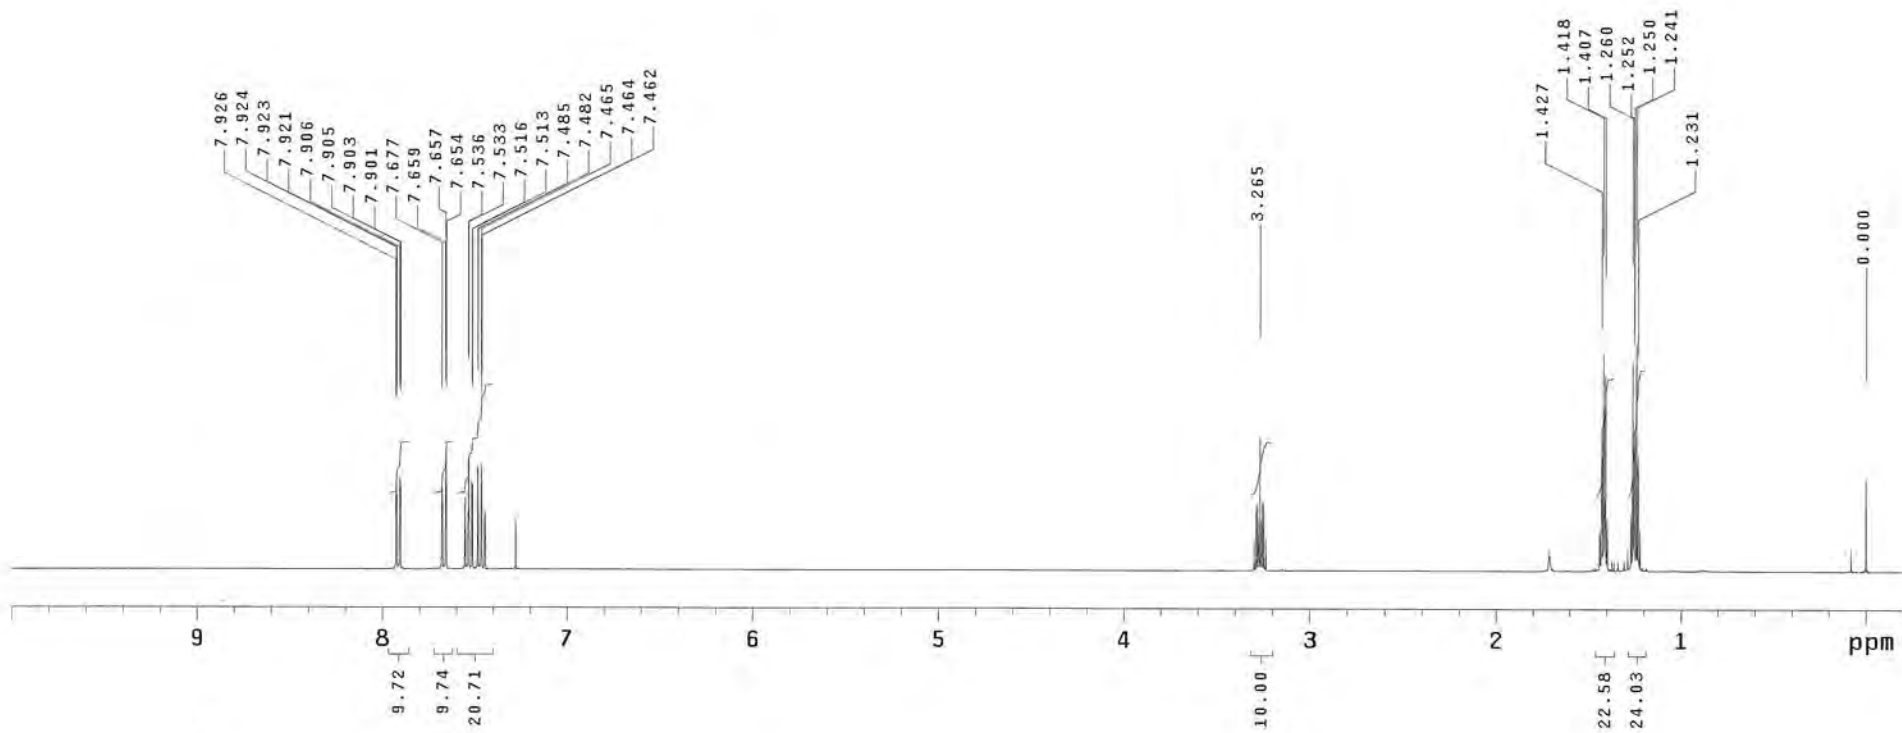

SIVA-RP4-158

Pulse Sequence: s2pul

Mercury-400BB "MercuryPlus400"

Date: Mar 3 2014

Solvent: CDC13

Ambient temperature

Total 320 repetitions

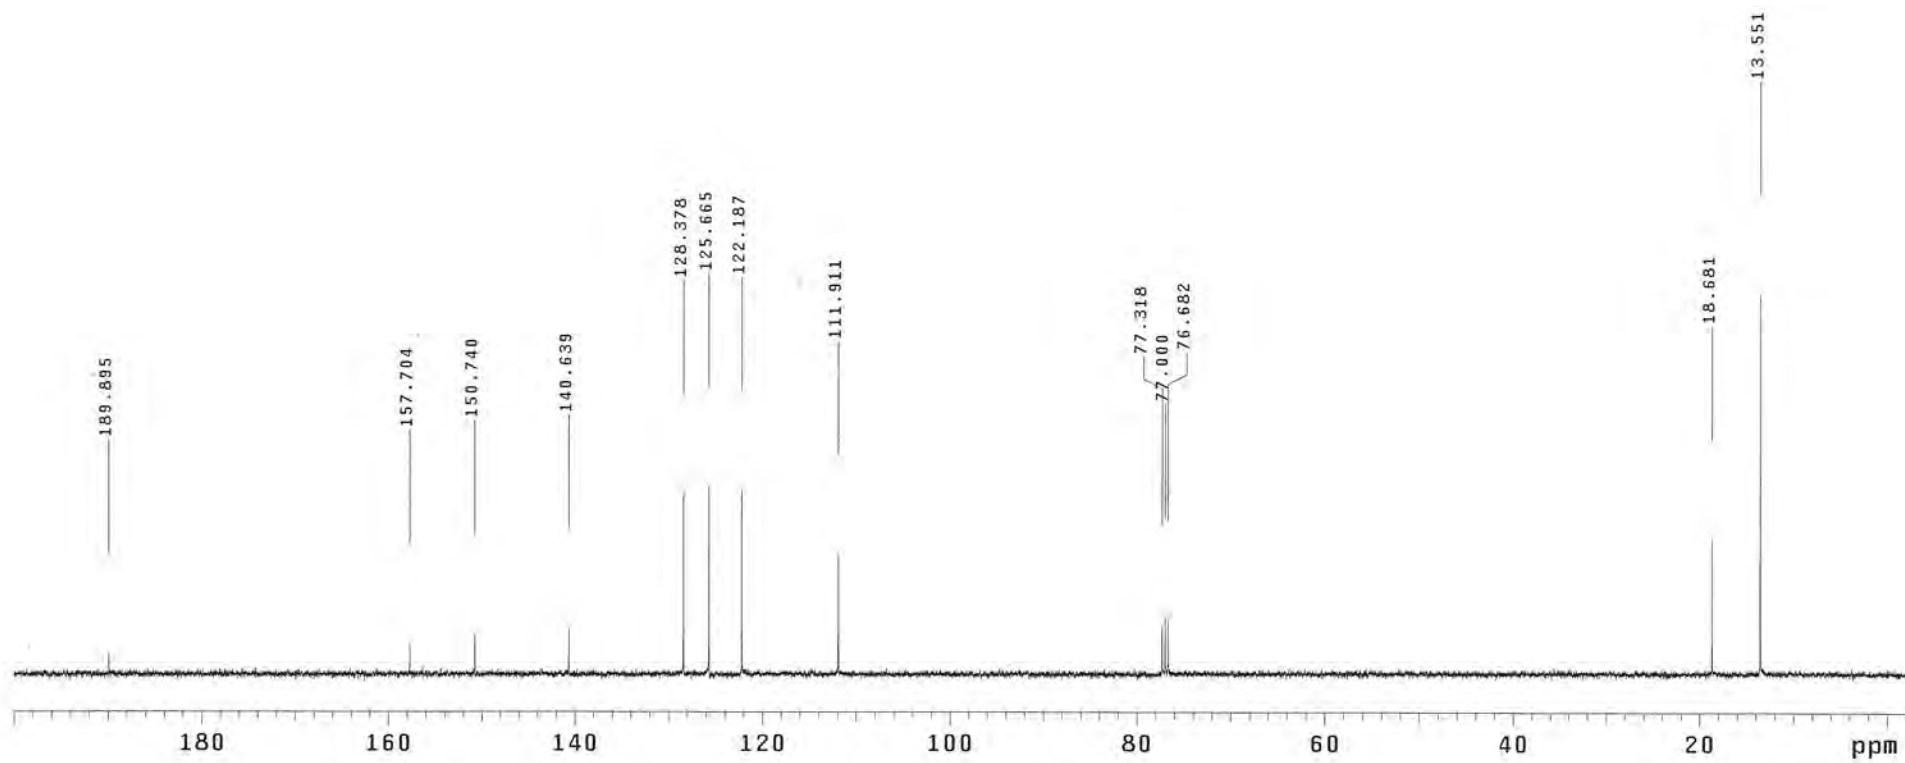

SIVA-RP57

Pulse Sequence: s2pul

Solvent: CDCl3

Ambient temperature

Mercury-400BB "MercuryPlus400"

Pulse 48.1 degrees  
Acq. time 4.000 sec  
Width 5995.2 Hz

32 repetitions

OBSERVE H1, 400.3978951 MHz

DATA PROCESSING

FT size 65536

Total time 2 min, 33 sec

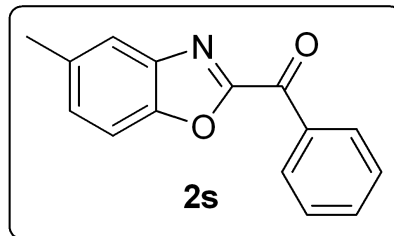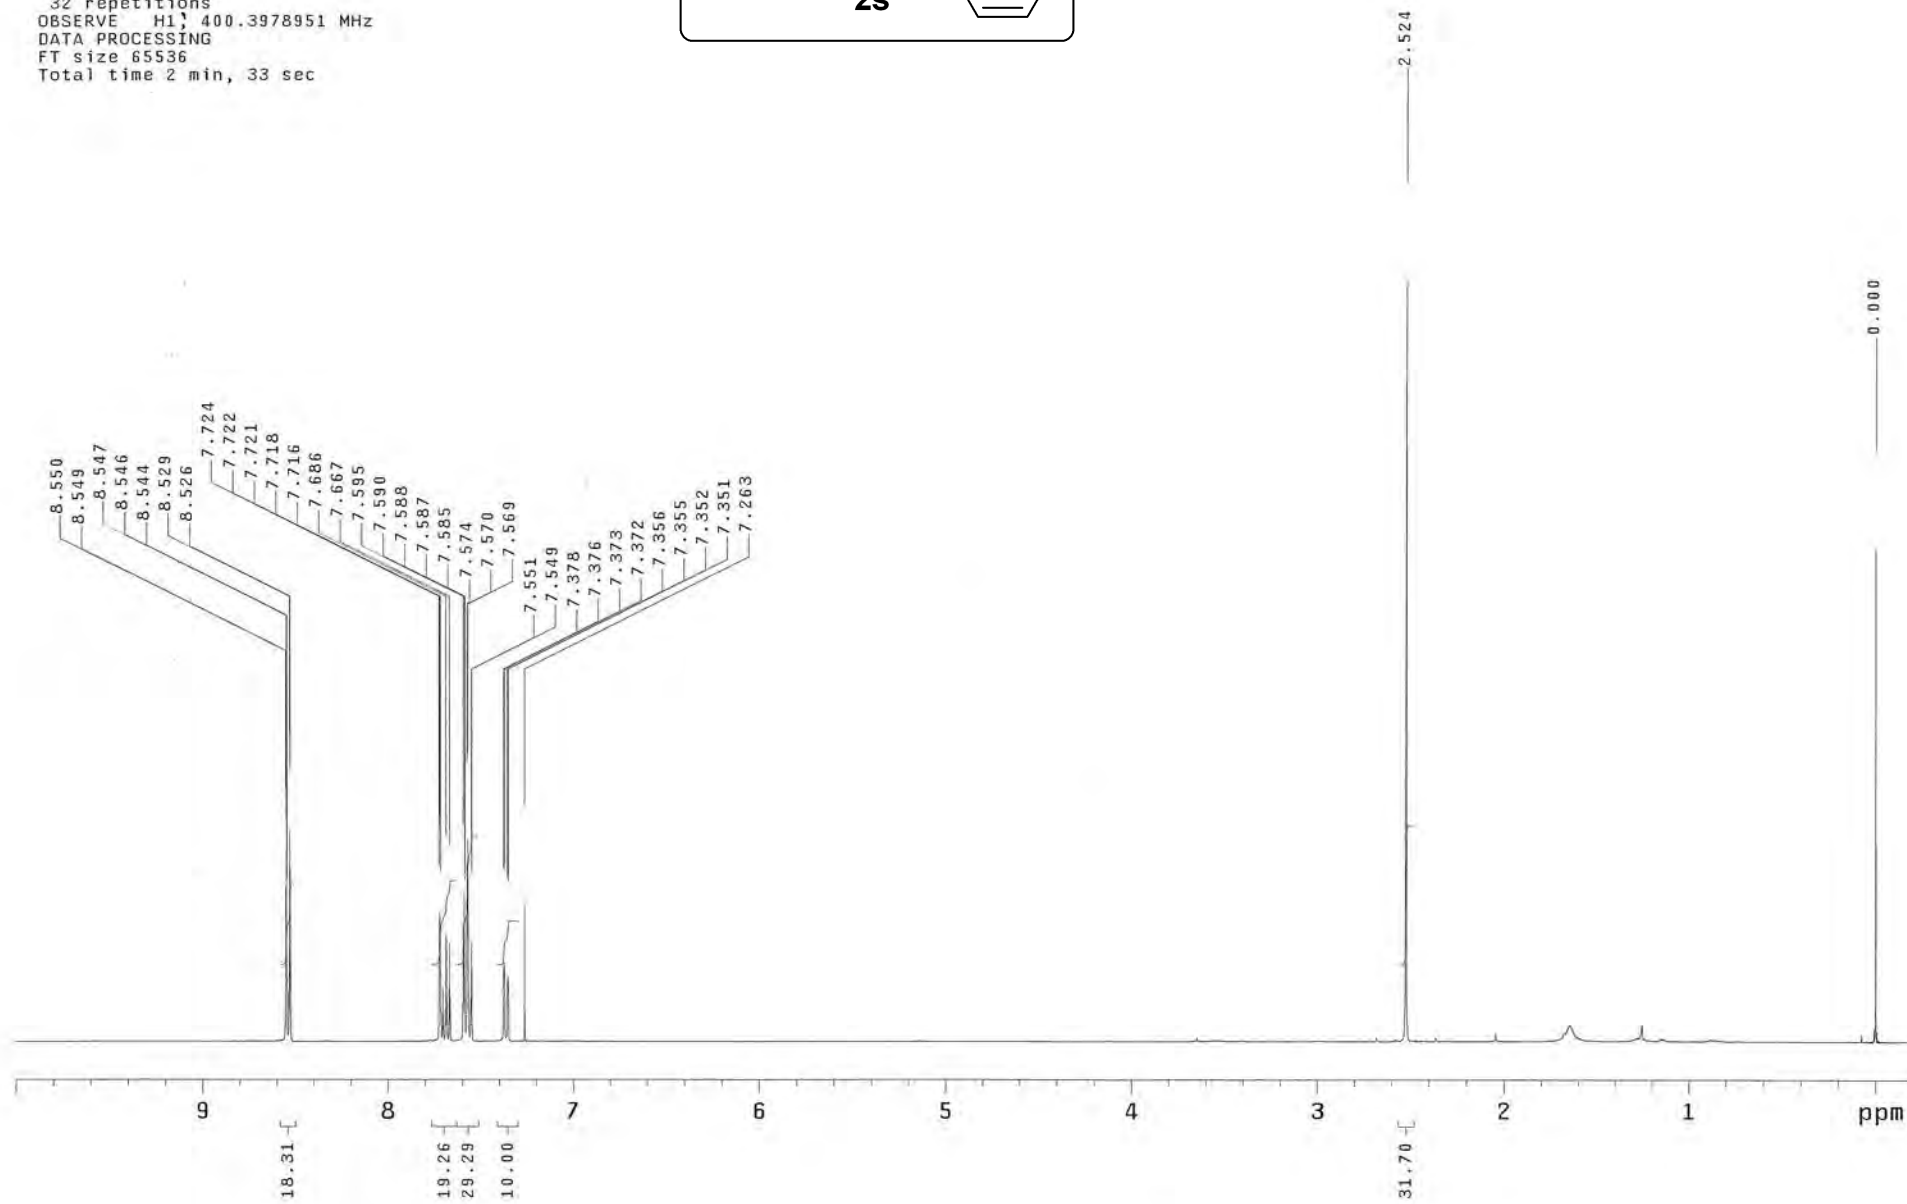

SIVA-RP3-57

Pulse Sequence: s2pu1

Solvent: CDCl3

Ambient temperature

Mercury-400BB "MercuryPlus400"

Pulse 68.7 degrees

Acq. time 1.000 sec

Width 25000.0 Hz

2064 repetitions

OBSERVE C13, 100.6801323 MHz

DECOUPLE H1, 400.3999572 MHz

Power 38 dB

continuously on

WALTZ-16 modulated

DATA PROCESSING

Line broadening 1.0 Hz

FT size 65536

Total time 10 hr, 55 min, 47 sec

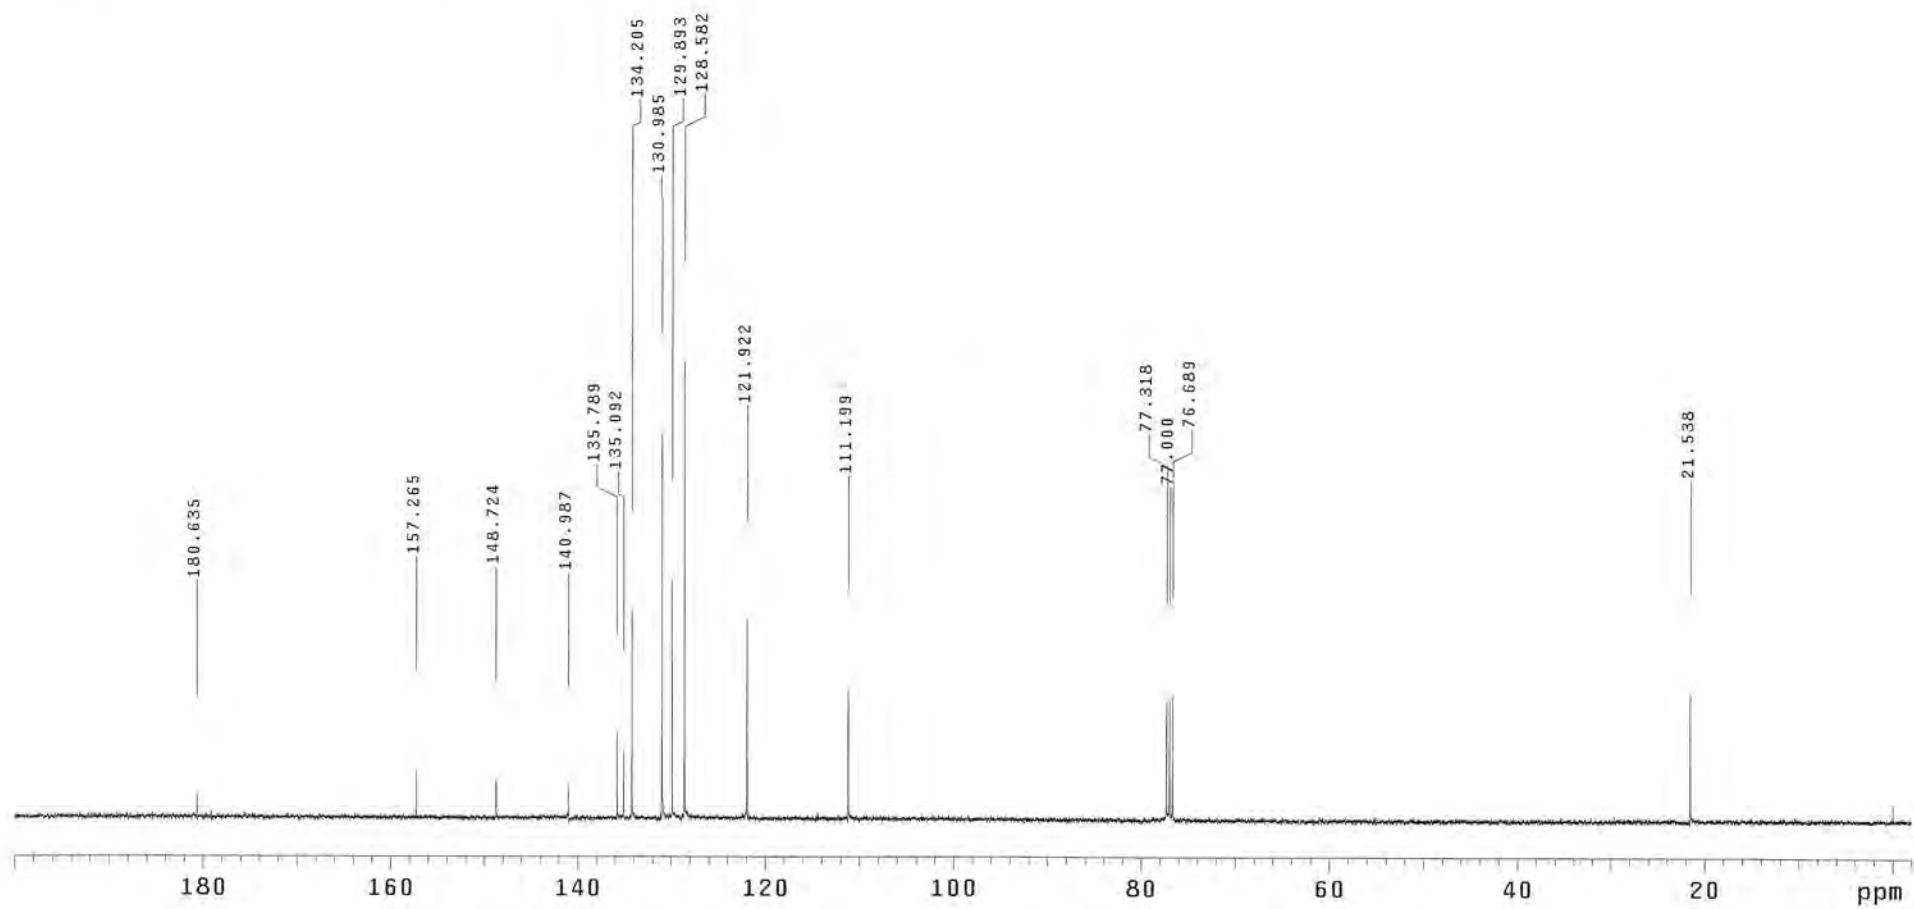

SIVA-RP3-85

Pulse Sequence: s2pu1

Solvent: CDCl3

Ambient temperature

Mercury-400BB "MercuryPlus400"

Pulse 48.1 degrees

Acq. time 4.002 sec

Width 5995.2 Hz

32 repetitions

OBSERVE H1, 400.3978954 MHz

DATA PROCESSING

Line broadening 0.1 Hz

FT size 65536

Total time 2 min, 33 sec

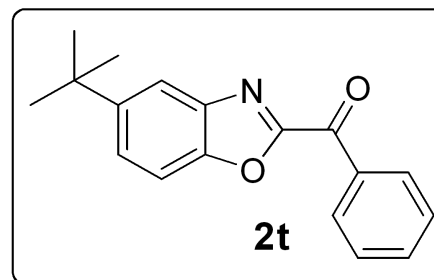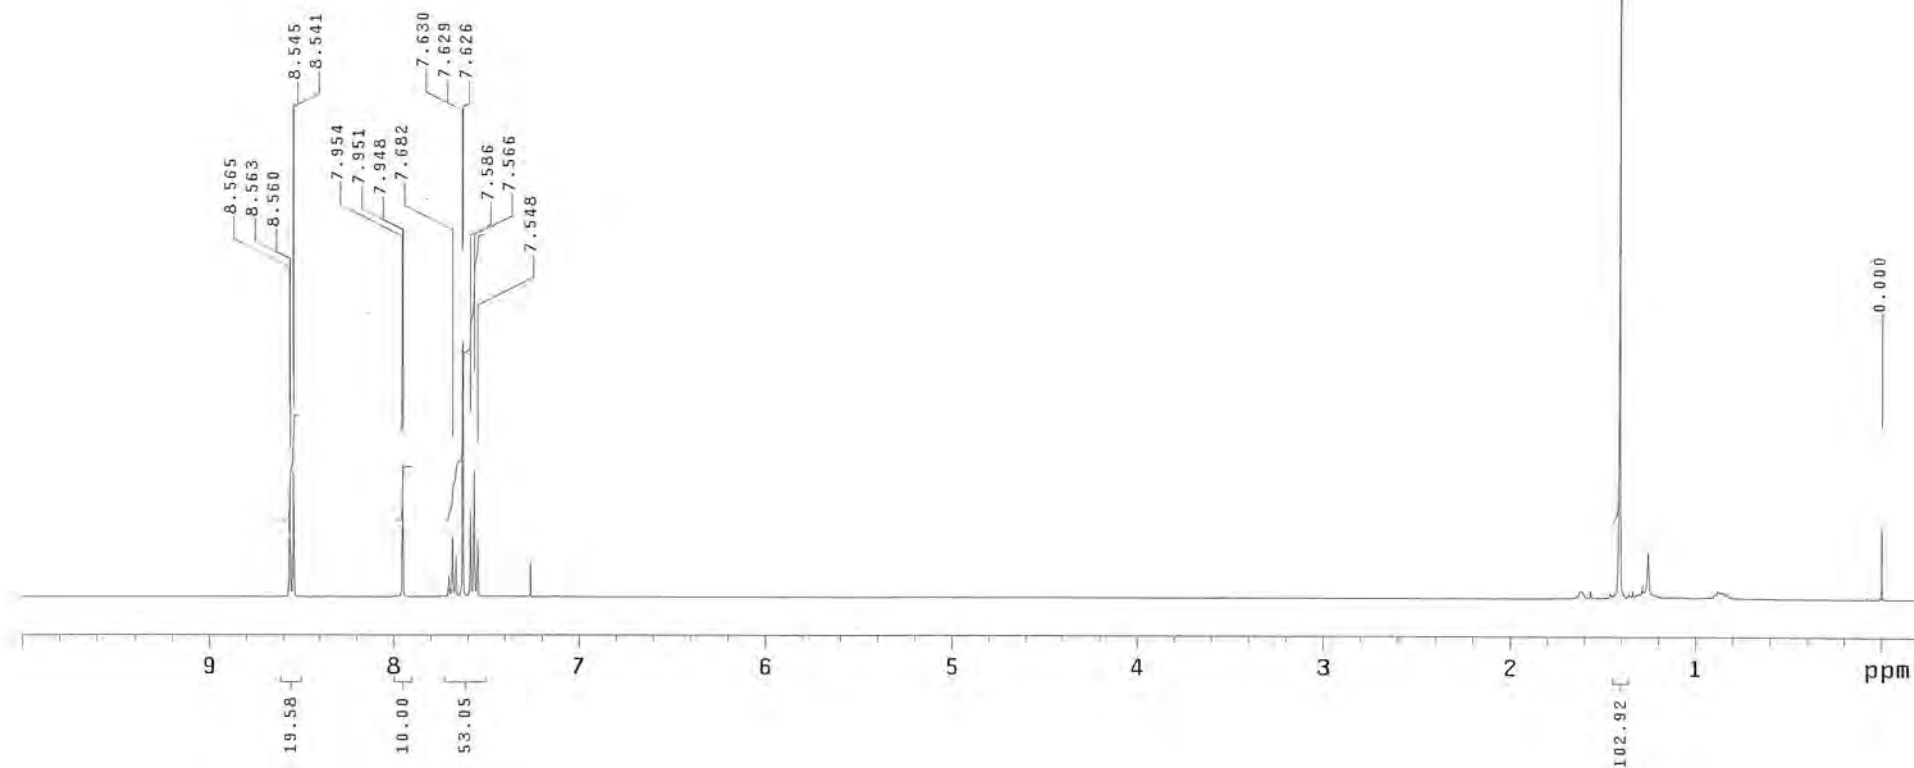

SIVA-RP3-85

Pulse Sequence: s2pul

Solvent: CDC13  
Ambient temperature  
Mercury-400BB "MercuryPlus400"

Pulse 68.7 degrees  
Acq. time 1.000 sec  
Width 25000.0 Hz  
3328 repetitions  
OBSERVE C13, 100.6801330 MHz  
DECOUPLE H1, 400.3999572 MHz  
Power 38 dB  
continuously on  
WALTZ-16 modulated  
DATA PROCESSING  
Line broadening 1.0 Hz  
FT size 65536  
Total time 4 hr, 22 min, 18 sec

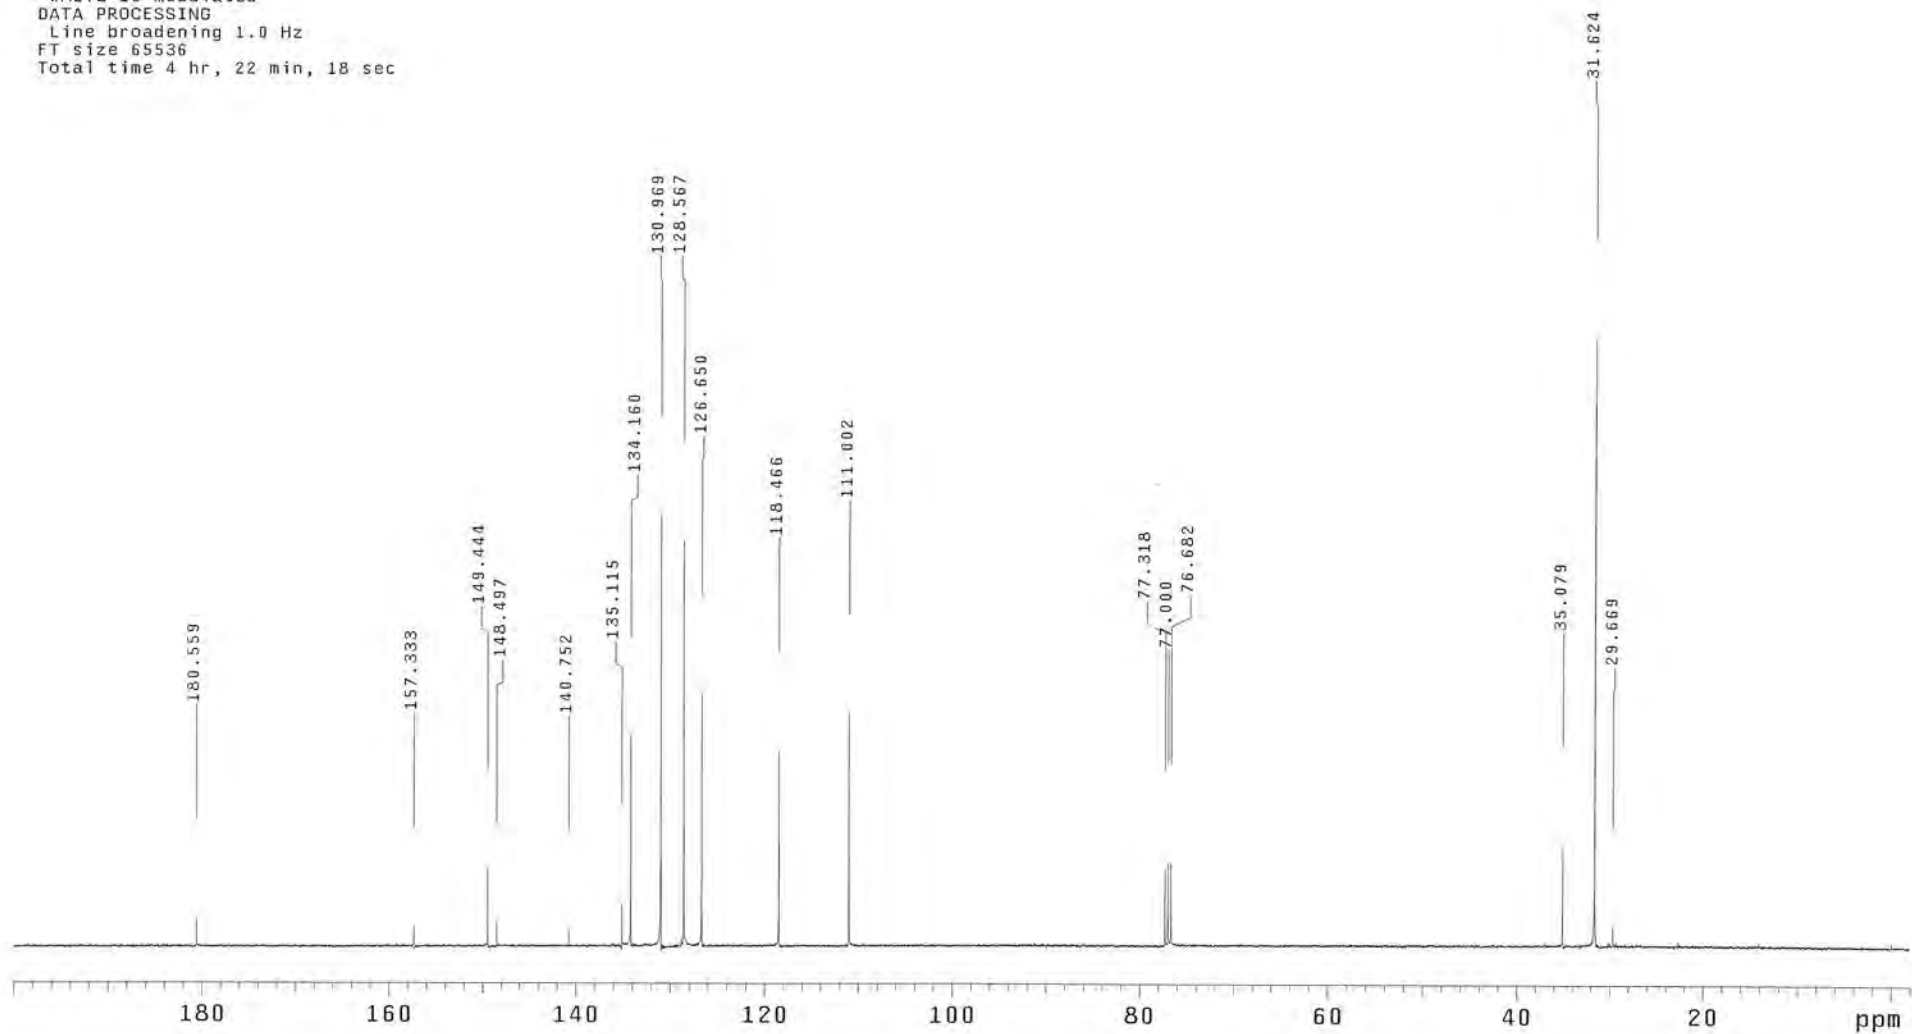



SIVA-RP3-39

Pulse Sequence: s2pu1

Solvent: CDCl3

Ambient temperature

Mercury-400BB "MercuryPlus400"

Pulse 48.1 degrees

Acq. time 4.002 sec

Width 5995.2 Hz

32 repetitions

OBSERVE H1, 400.3978927 MHz

DATA PROCESSING

FT size 65536

Total time 2 min, 33 sec

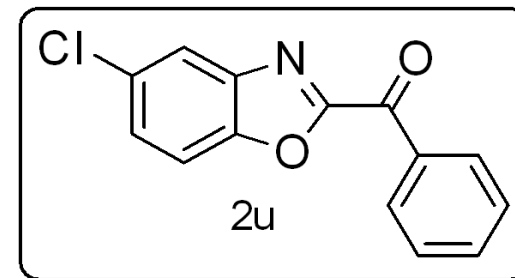

SIVA-RP3-39

Pulse Sequence: s2pul

Solvent: CDCl3

Ambient temperature

Mercury-400BB "MercuryPlus400"

Pulse 68.7 degrees

Acq. time 1.000 sec

Width 25000.0 Hz

2464 repetitions

OBSERVE C13, 100.6801346 MHz

DECOUPLE H1, 400.3999572 MHz

Power 38 dB

continuously on

WALTZ-16 modulated

DATA PROCESSING

Line broadening 1.0 Hz

FT size 65536

Total time 21 hr, 51 min, 34 sec

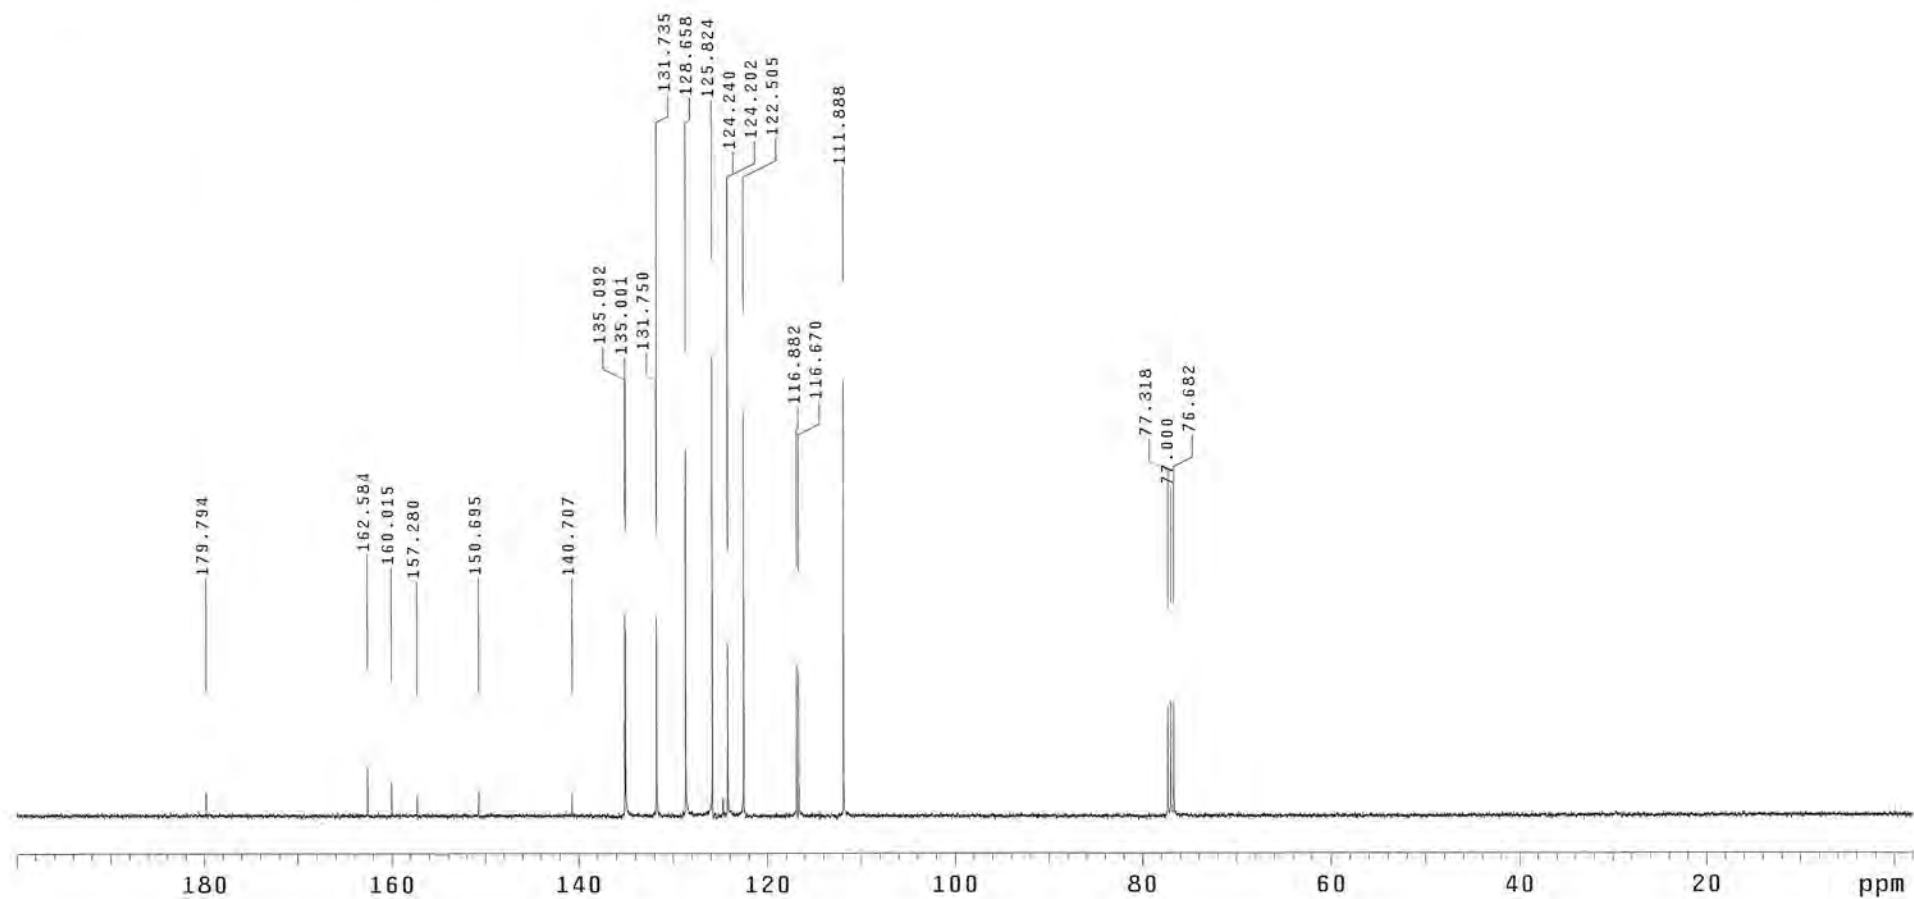

SIVA-RP5-10

Pulse Sequence: s2pu1

Mercury-400BB "MercuryPlus400"

Date: Mar 4 2014

Solvent: CDCl3

Ambient temperature

Total 28 repetitions

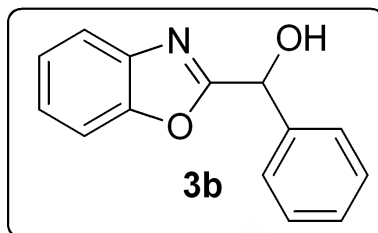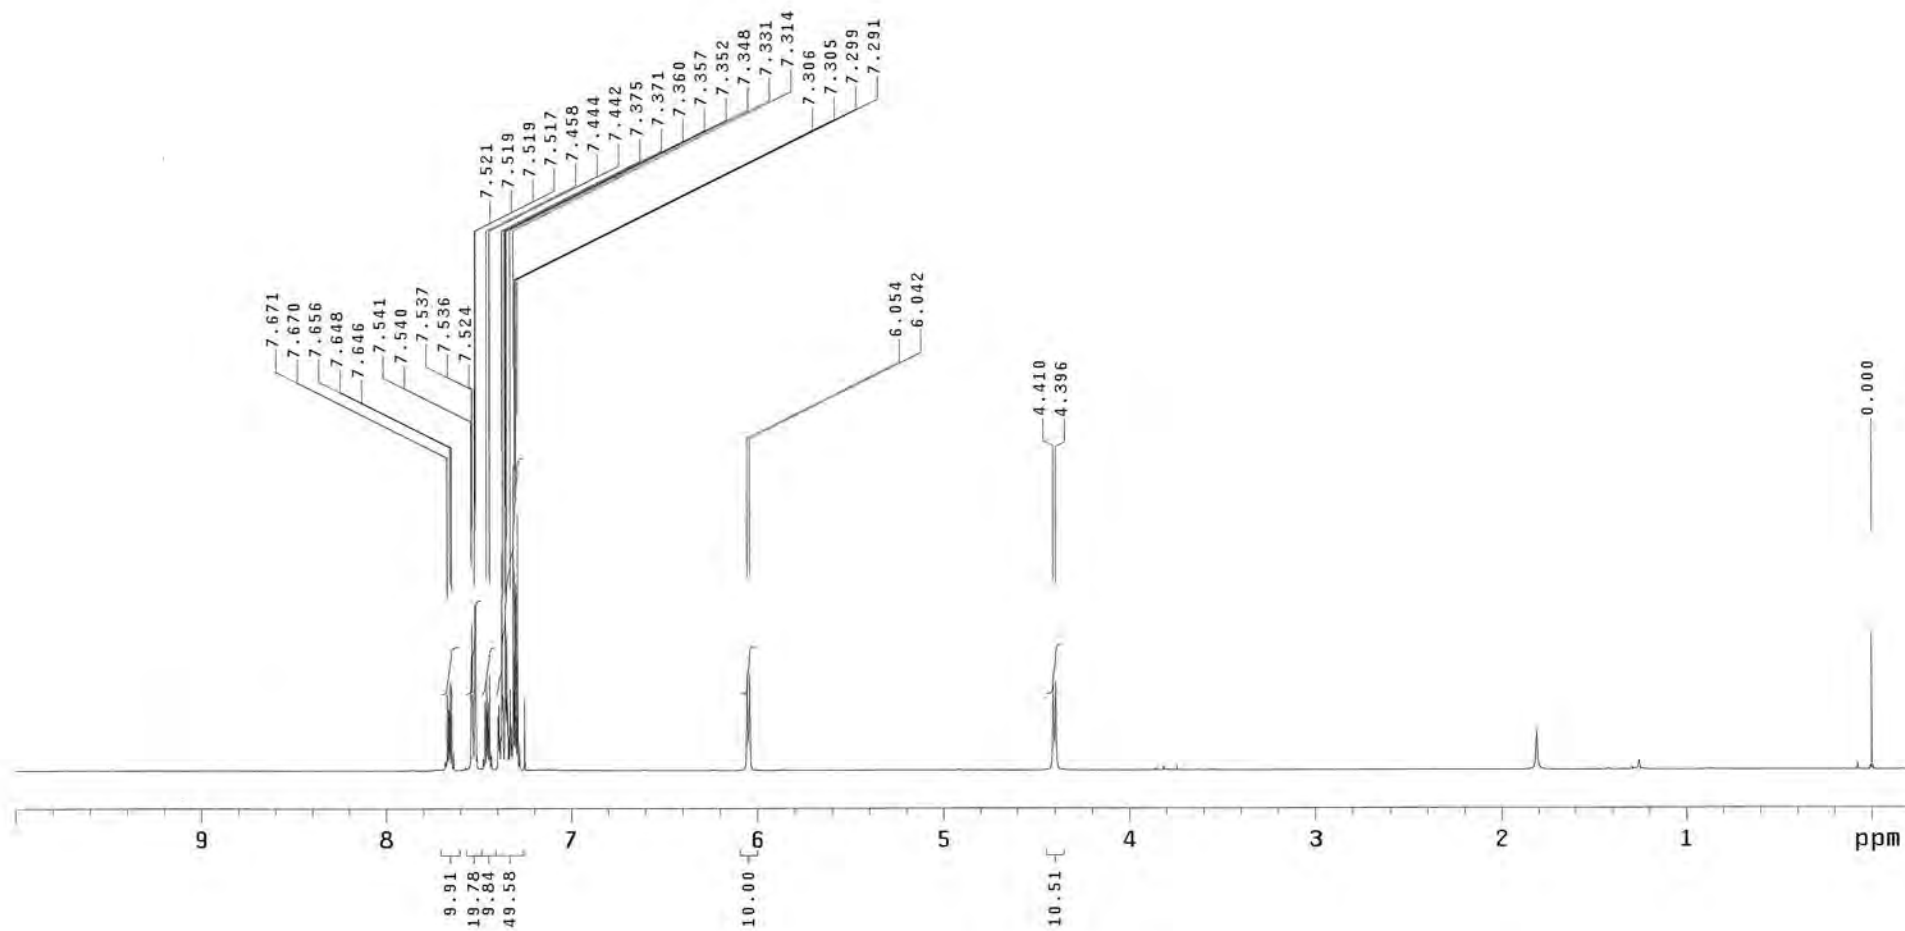

SIVA-RP5-10

Pulse Sequence: s2pu1

Mercury-400BB "MercuryPlus400"

Date: Mar 4 2014

Solvent: CDCl3

Ambient temperature

Total 2848 repetitions

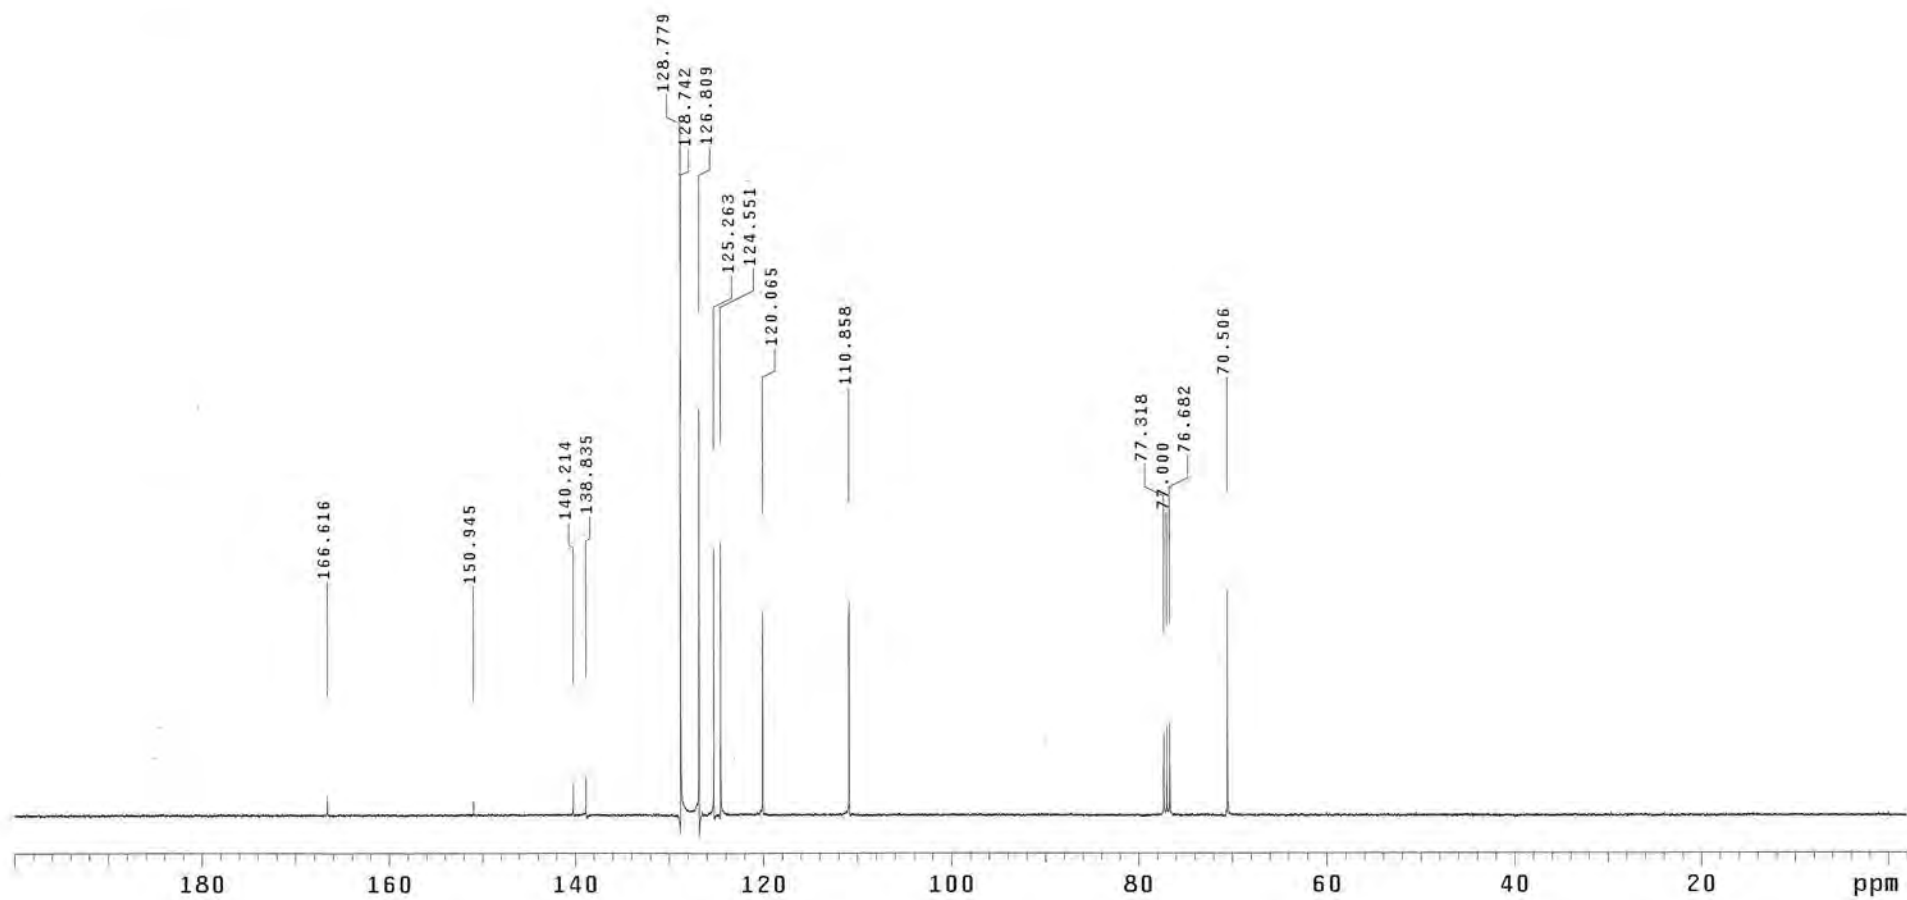

SIVA-RP4-183

Pulse Sequence: s2pu1

Mercury-400BB "MercuryPlus400"

Date: Mar 3 2014

Solvent: CDCl3

Ambient temperature

Total 64 repetitions

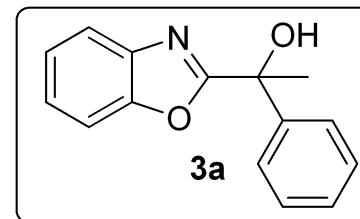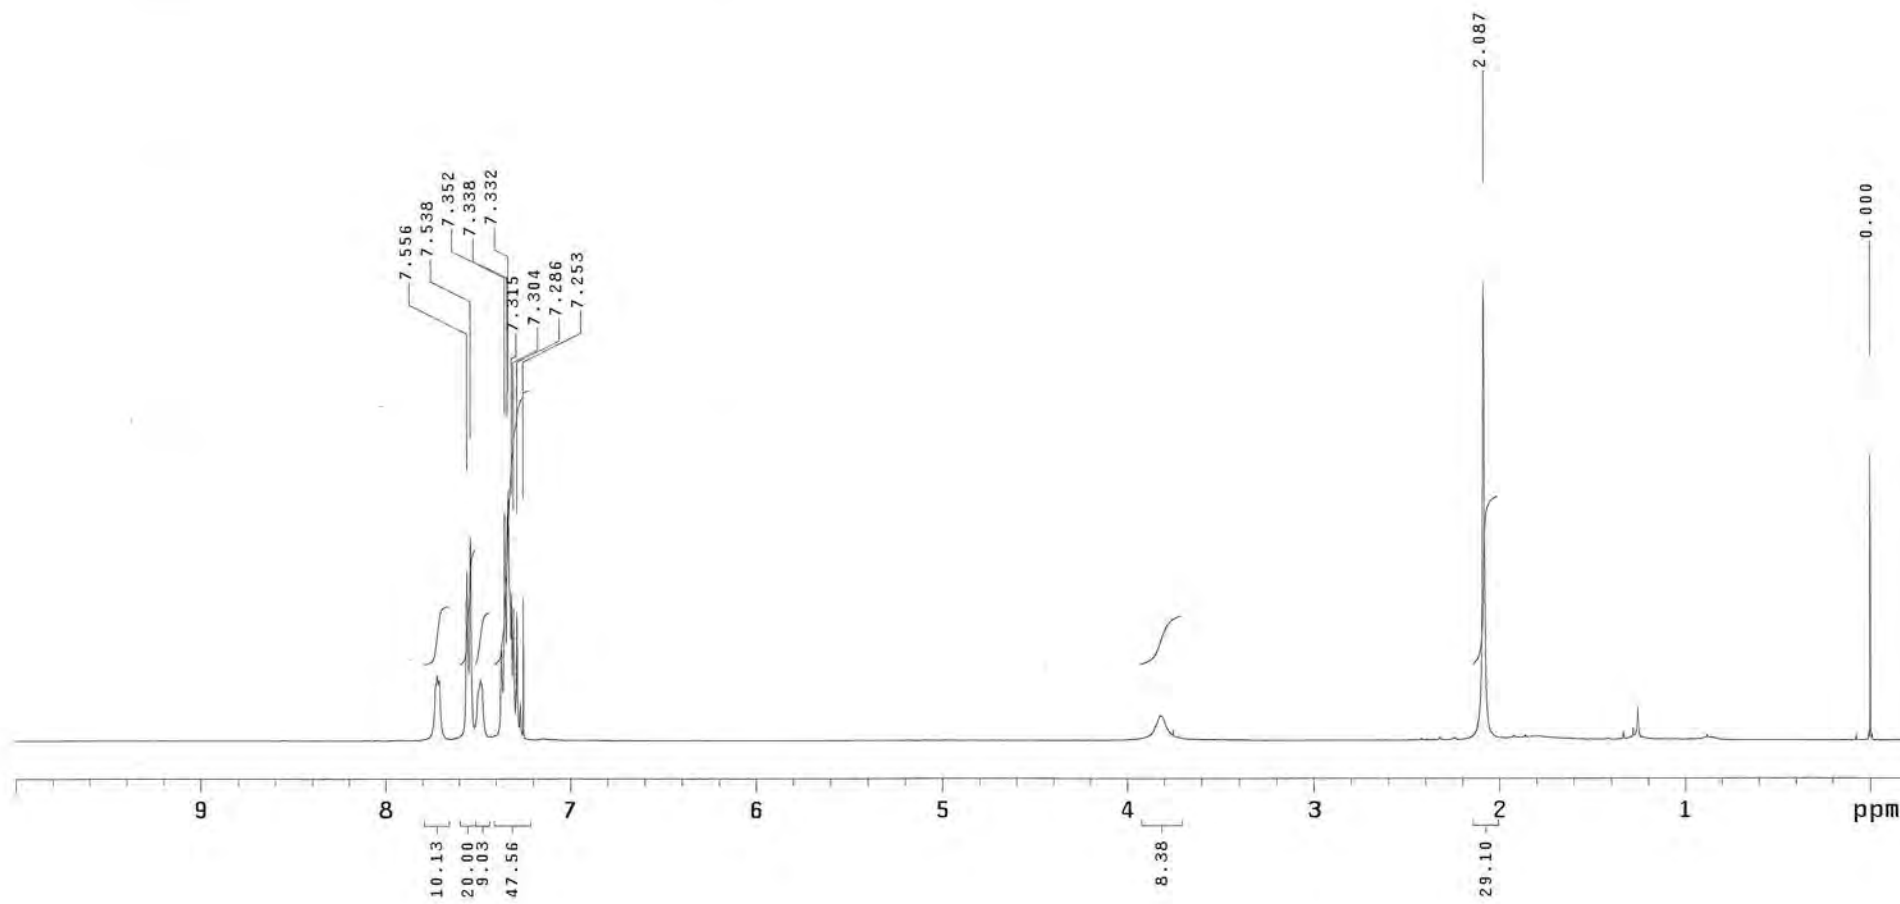

SIVA-RP4-183

Pulse Sequence: s2pu1

Mercury-400BB, "MercuryPlus400"

Date: Mar 3 2014

Solvent: CDCl3

Ambient temperature

Total 3040 repetitions

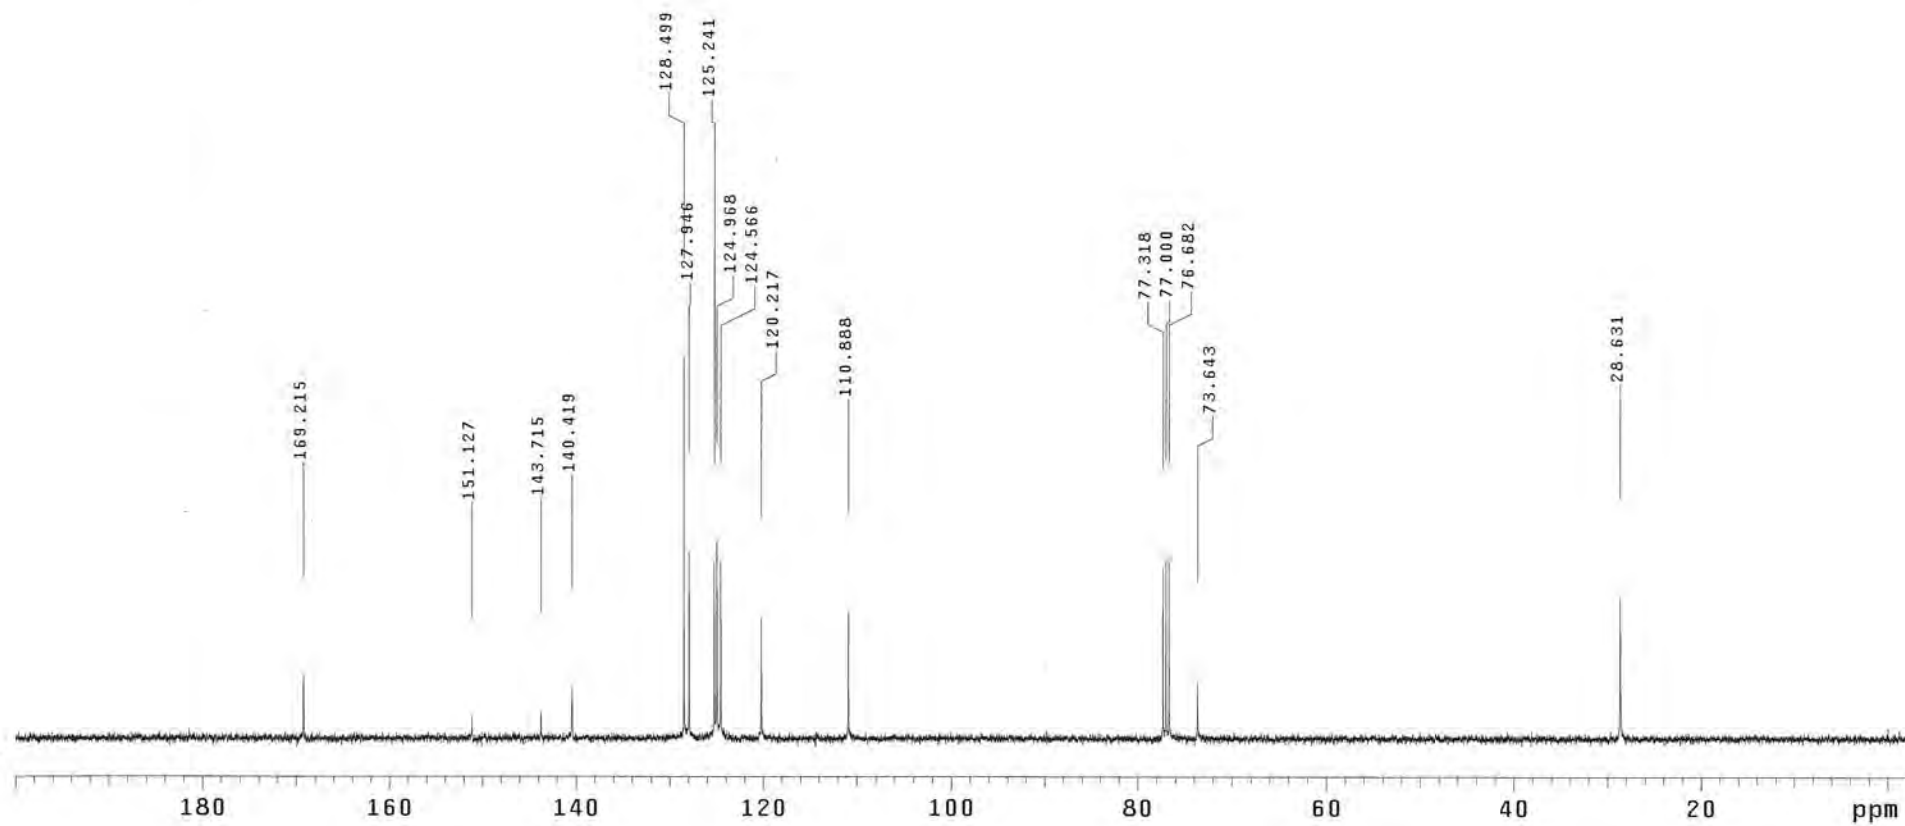

SIVA-RP5-121B

Pulse Sequence: s2pu1

UNITYplus-400 "unity400"

Date: Apr 29 2014

Solvent: CDCl3

Ambient temperature

Total 64 repetitions

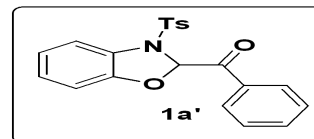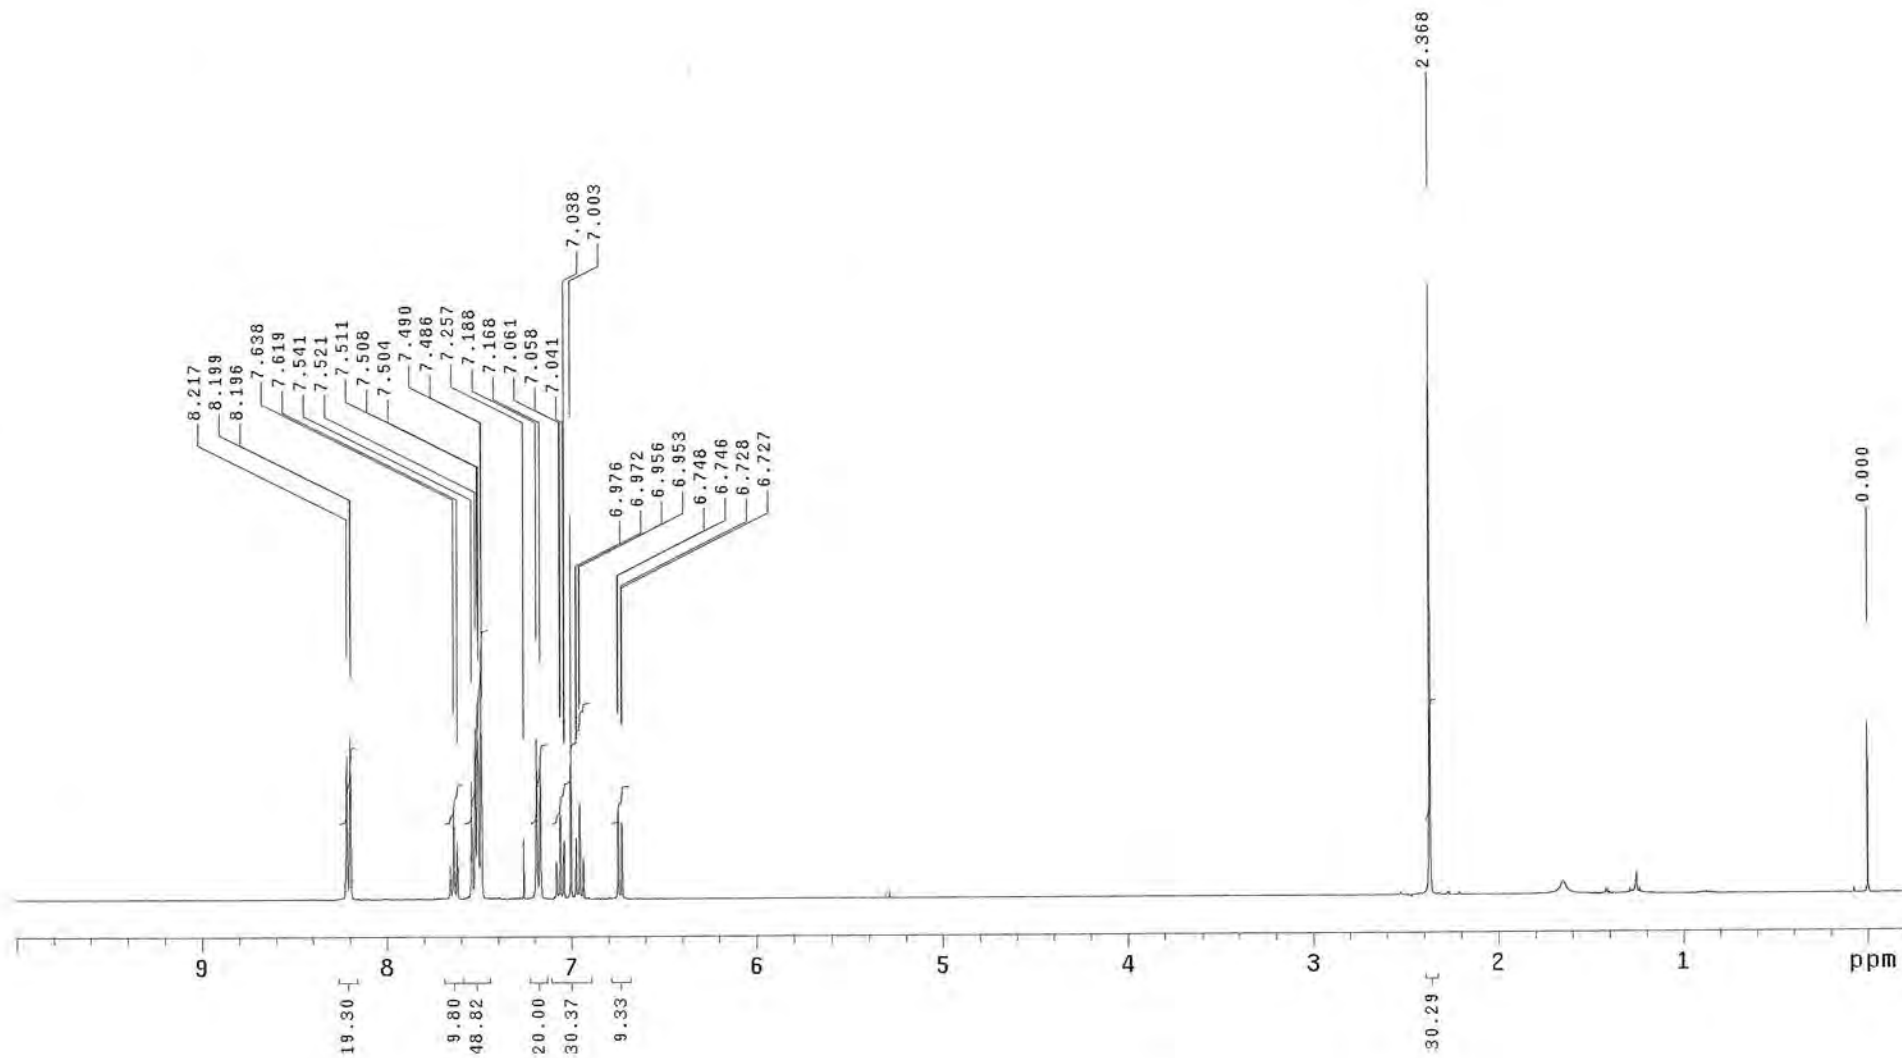

SIVA-RP5-121B

Pulse Sequence: s2pul

UNITYplus-400 "unity400"

Date: Apr 29 2014

Solvent: CDCl<sub>3</sub>

Ambient temperature

Total 3008 repetitions

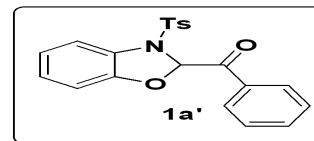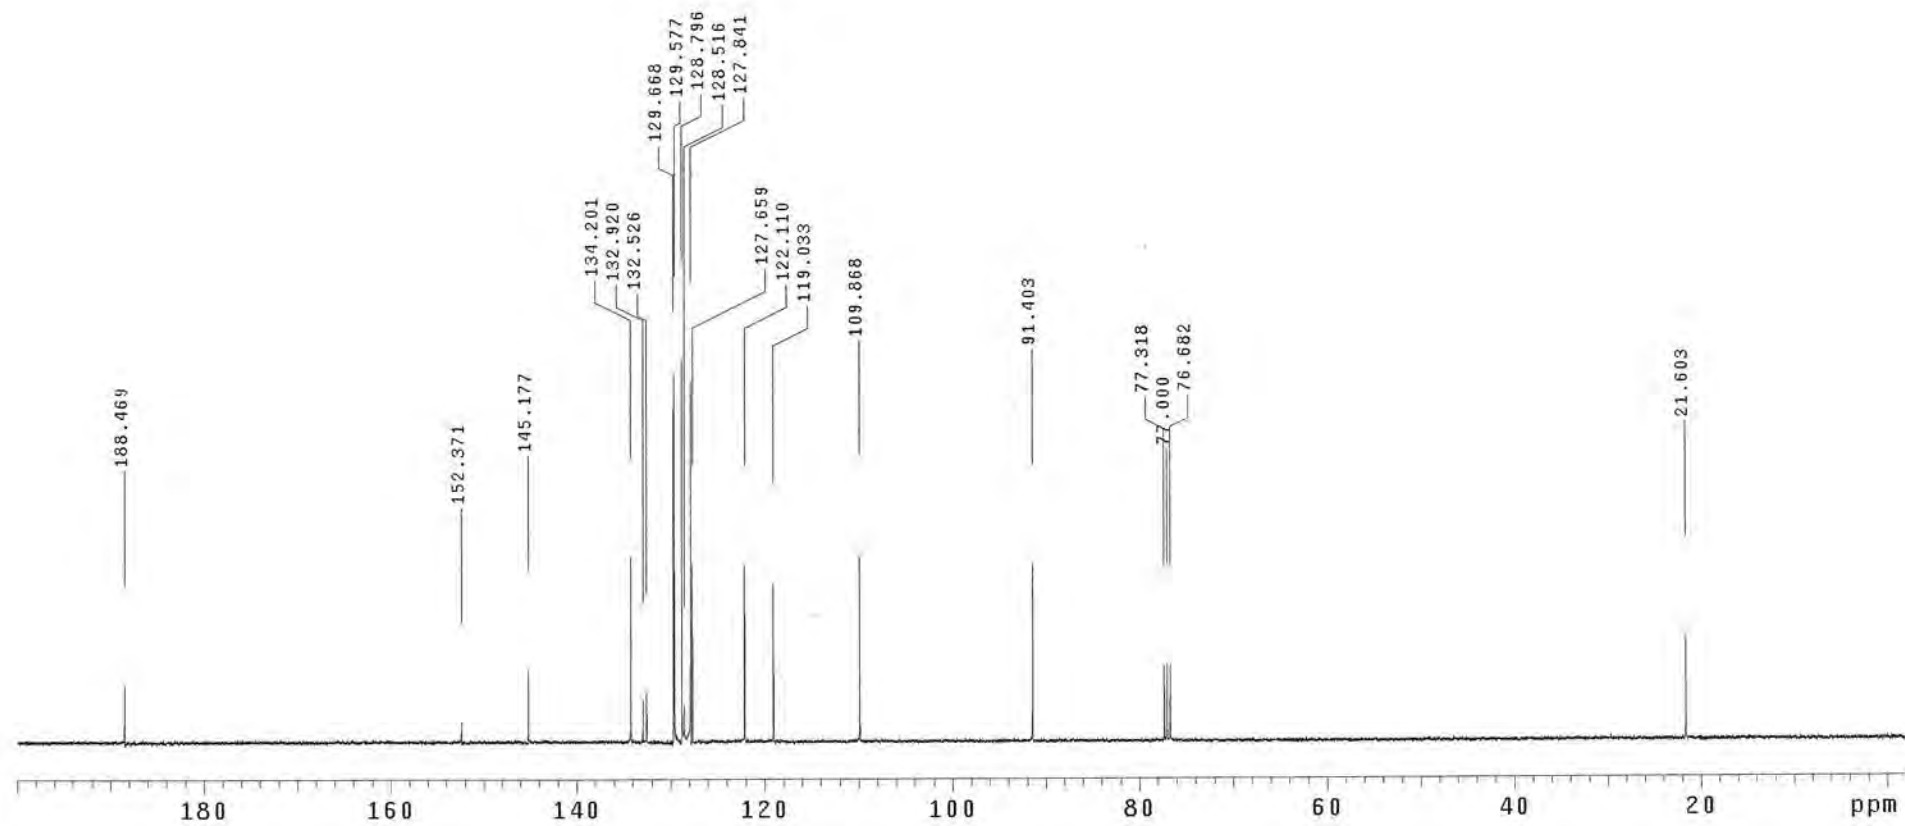



SIVA-RP5-121B

Pulse Sequence: DEPT

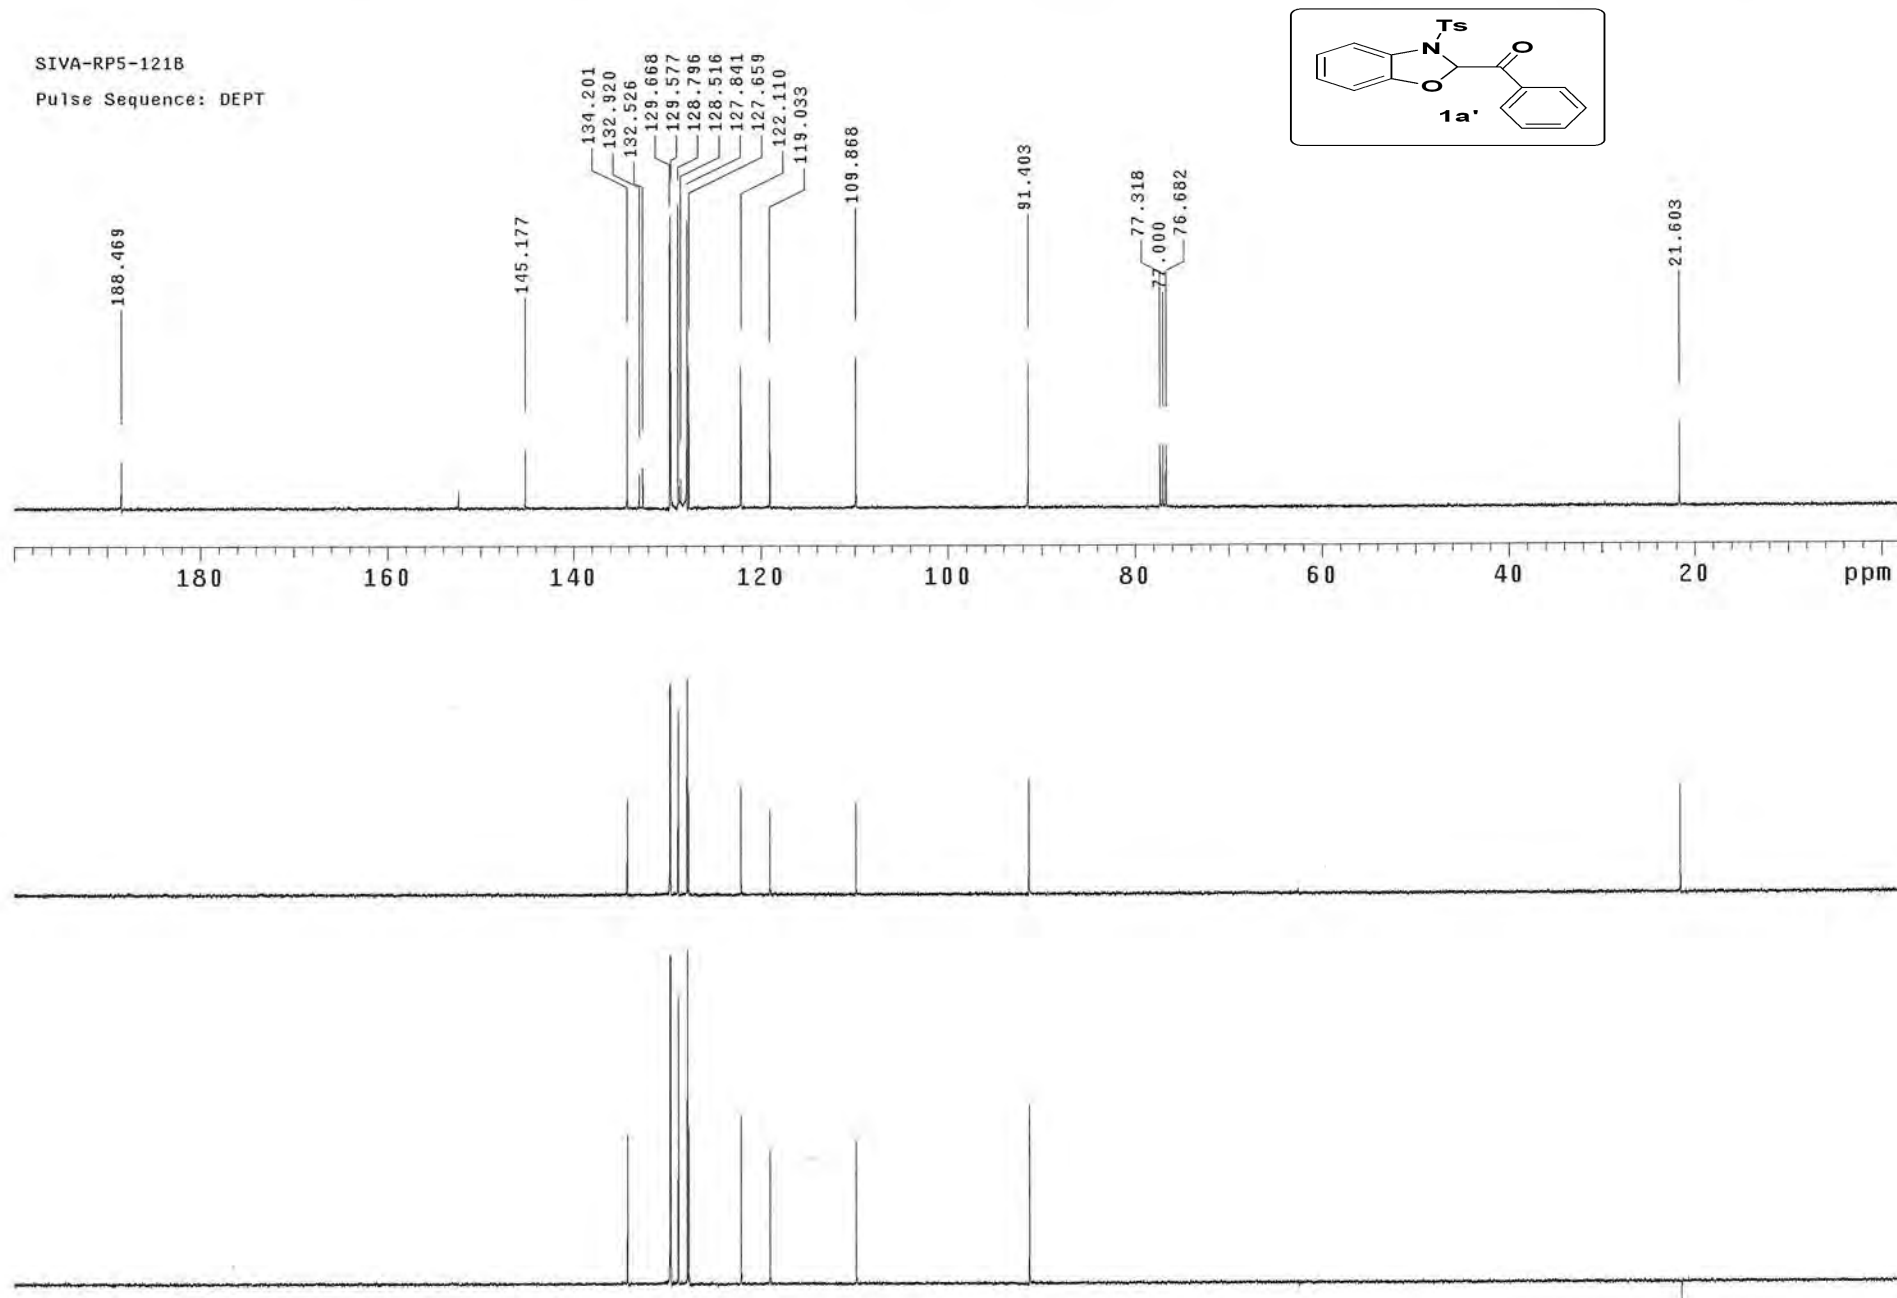

SIVA-RP5-122-A

Pulse Sequence: s2pu1

UNITYplus-400 "unity400"

Date: Apr 29 2014

Solvent: CDC13

Ambient temperature

Total 64 repetitions

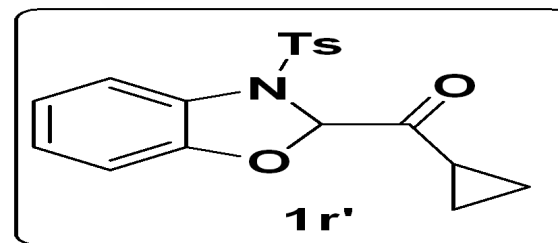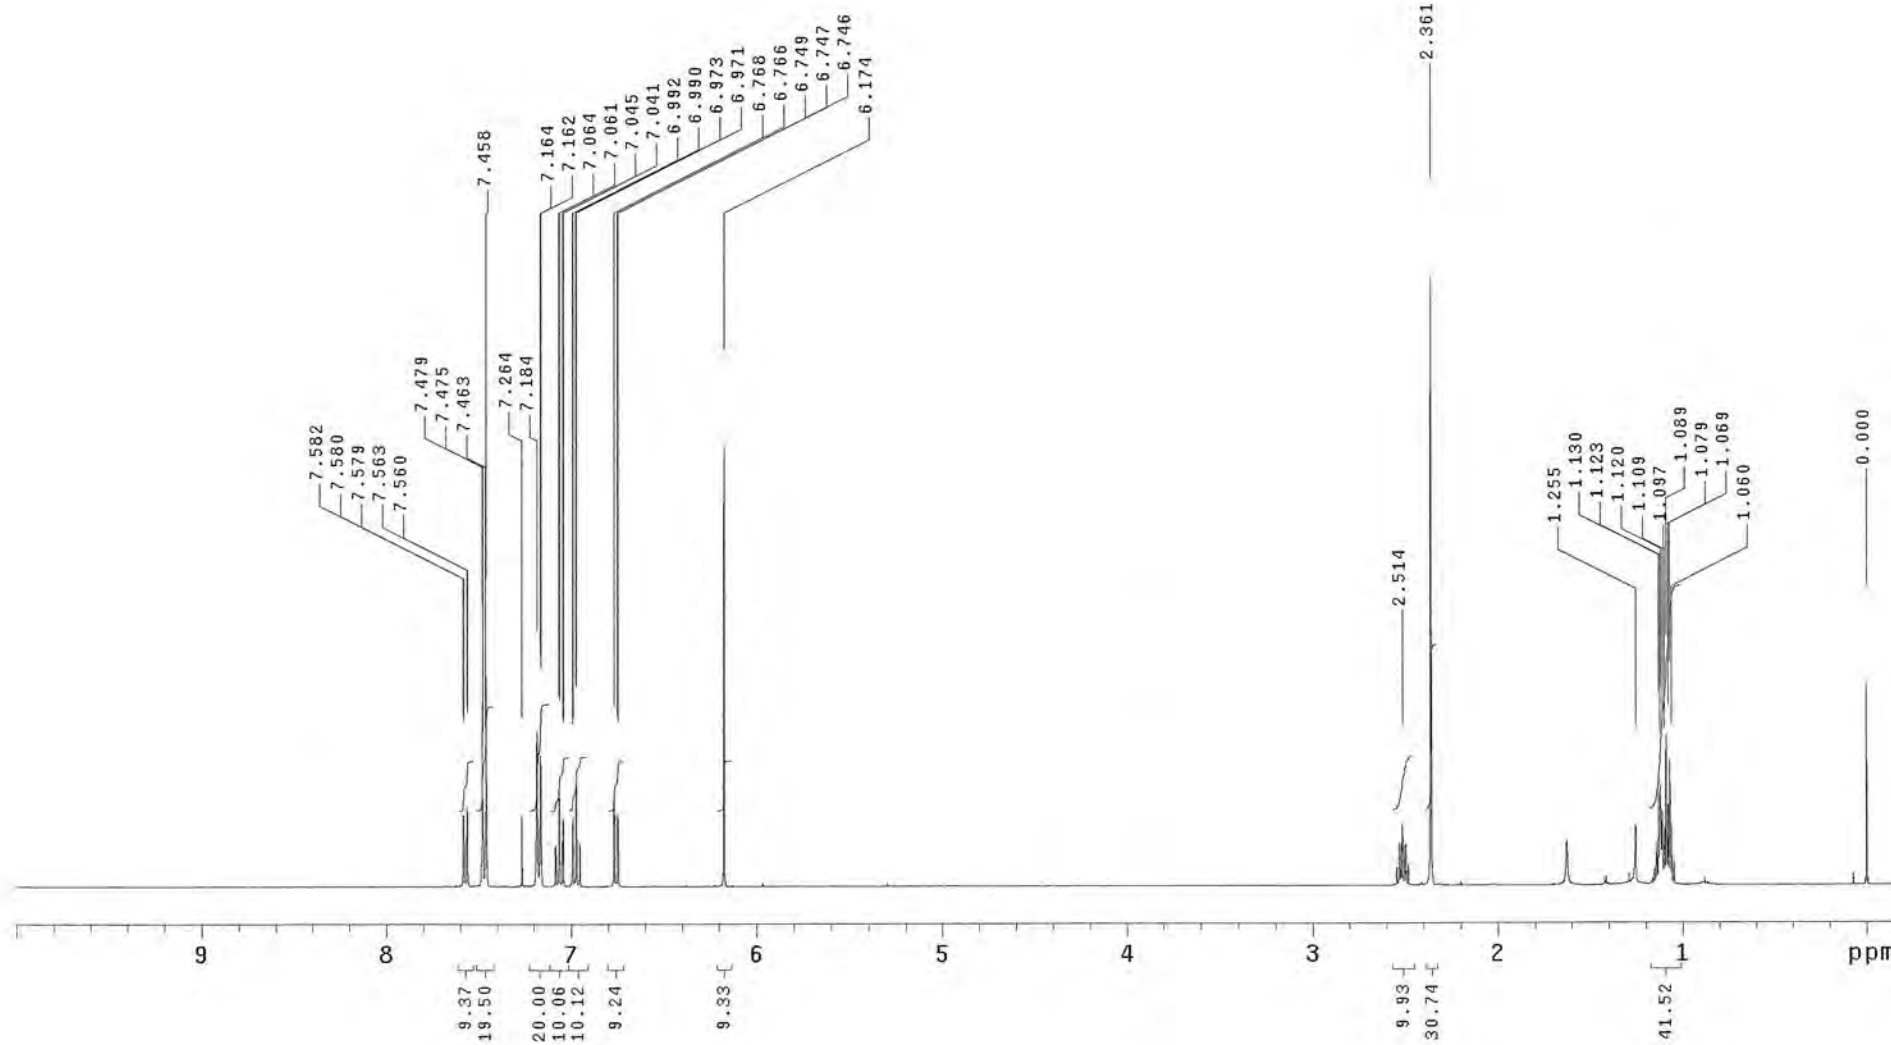

SIVA-RP5-122-A

Pulse Sequence: s2pul

UNITYplus-400 "unity400"

Date: Apr 29 2014

Solvent: CDCl<sub>3</sub>

Ambient temperature

Total 6272 repetitions

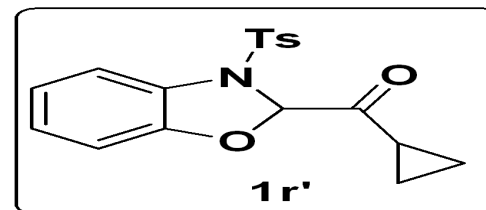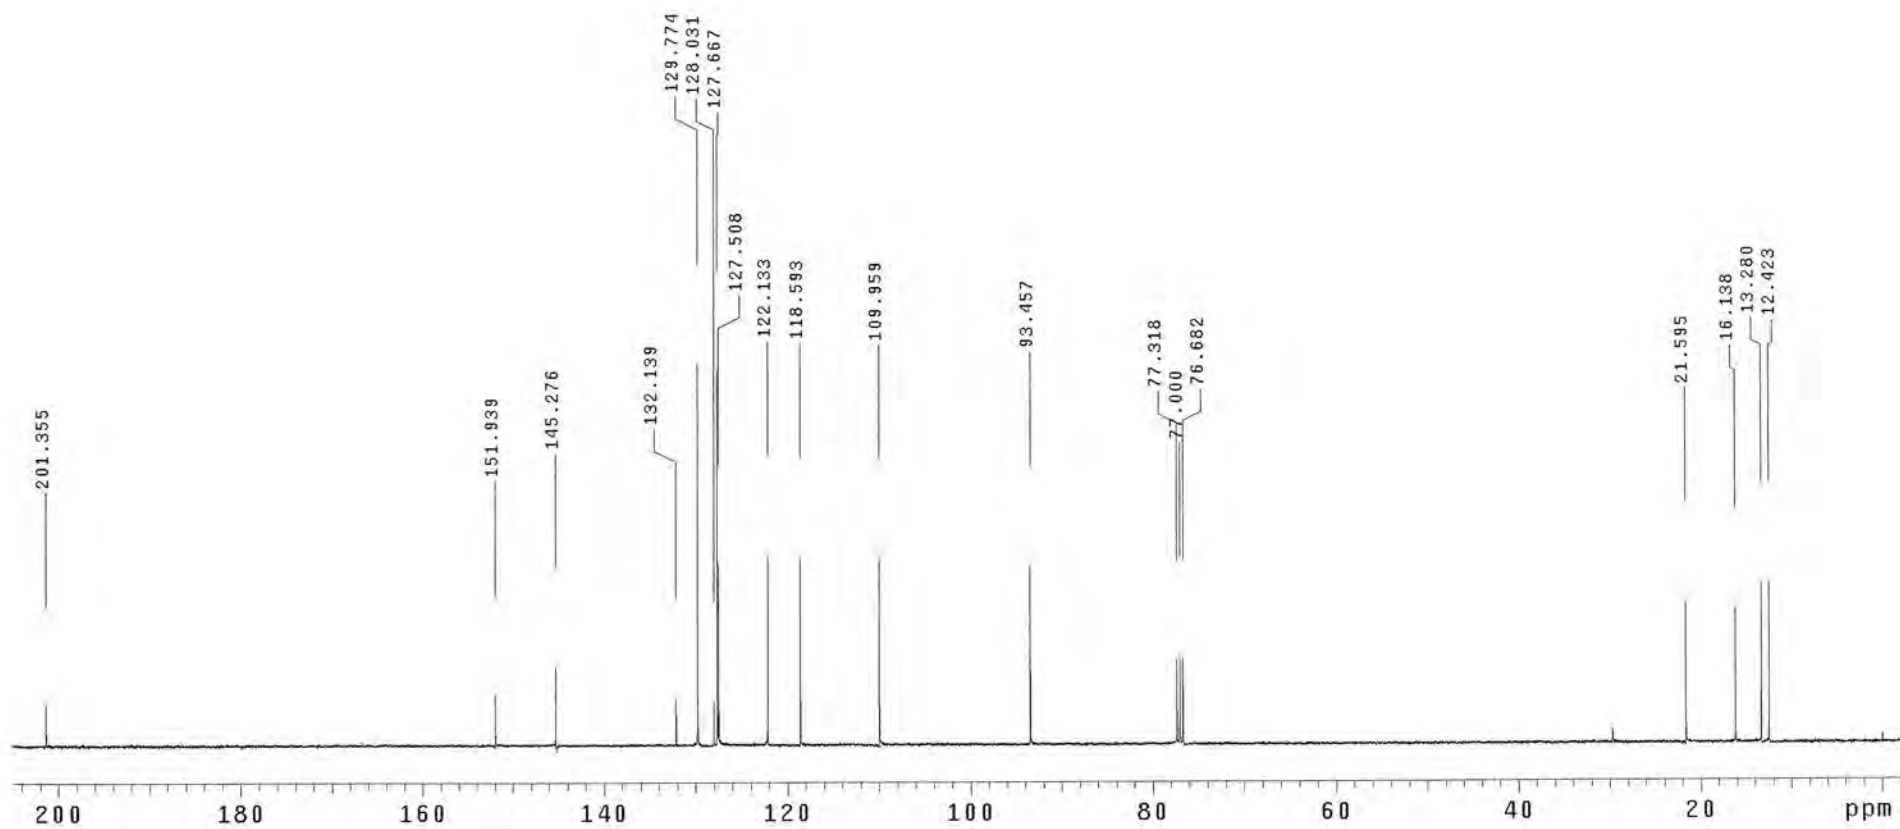

SIVA-RP3-29

Pulse Sequence: s2pu1

Solvent: CDCl3

Ambient temperature

Mercury-400BB "MercuryPlus400"

Pulse 48.1 degrees

Acq. time 4.000 sec

Width 5995.2 Hz

32 repetitions

OBSERVE H1, 400.3978962 MHz

DATA PROCESSING

FI size 65536

Total time 2 min, 33 sec

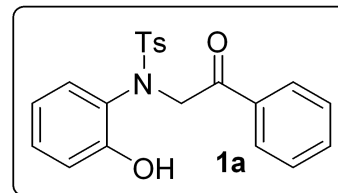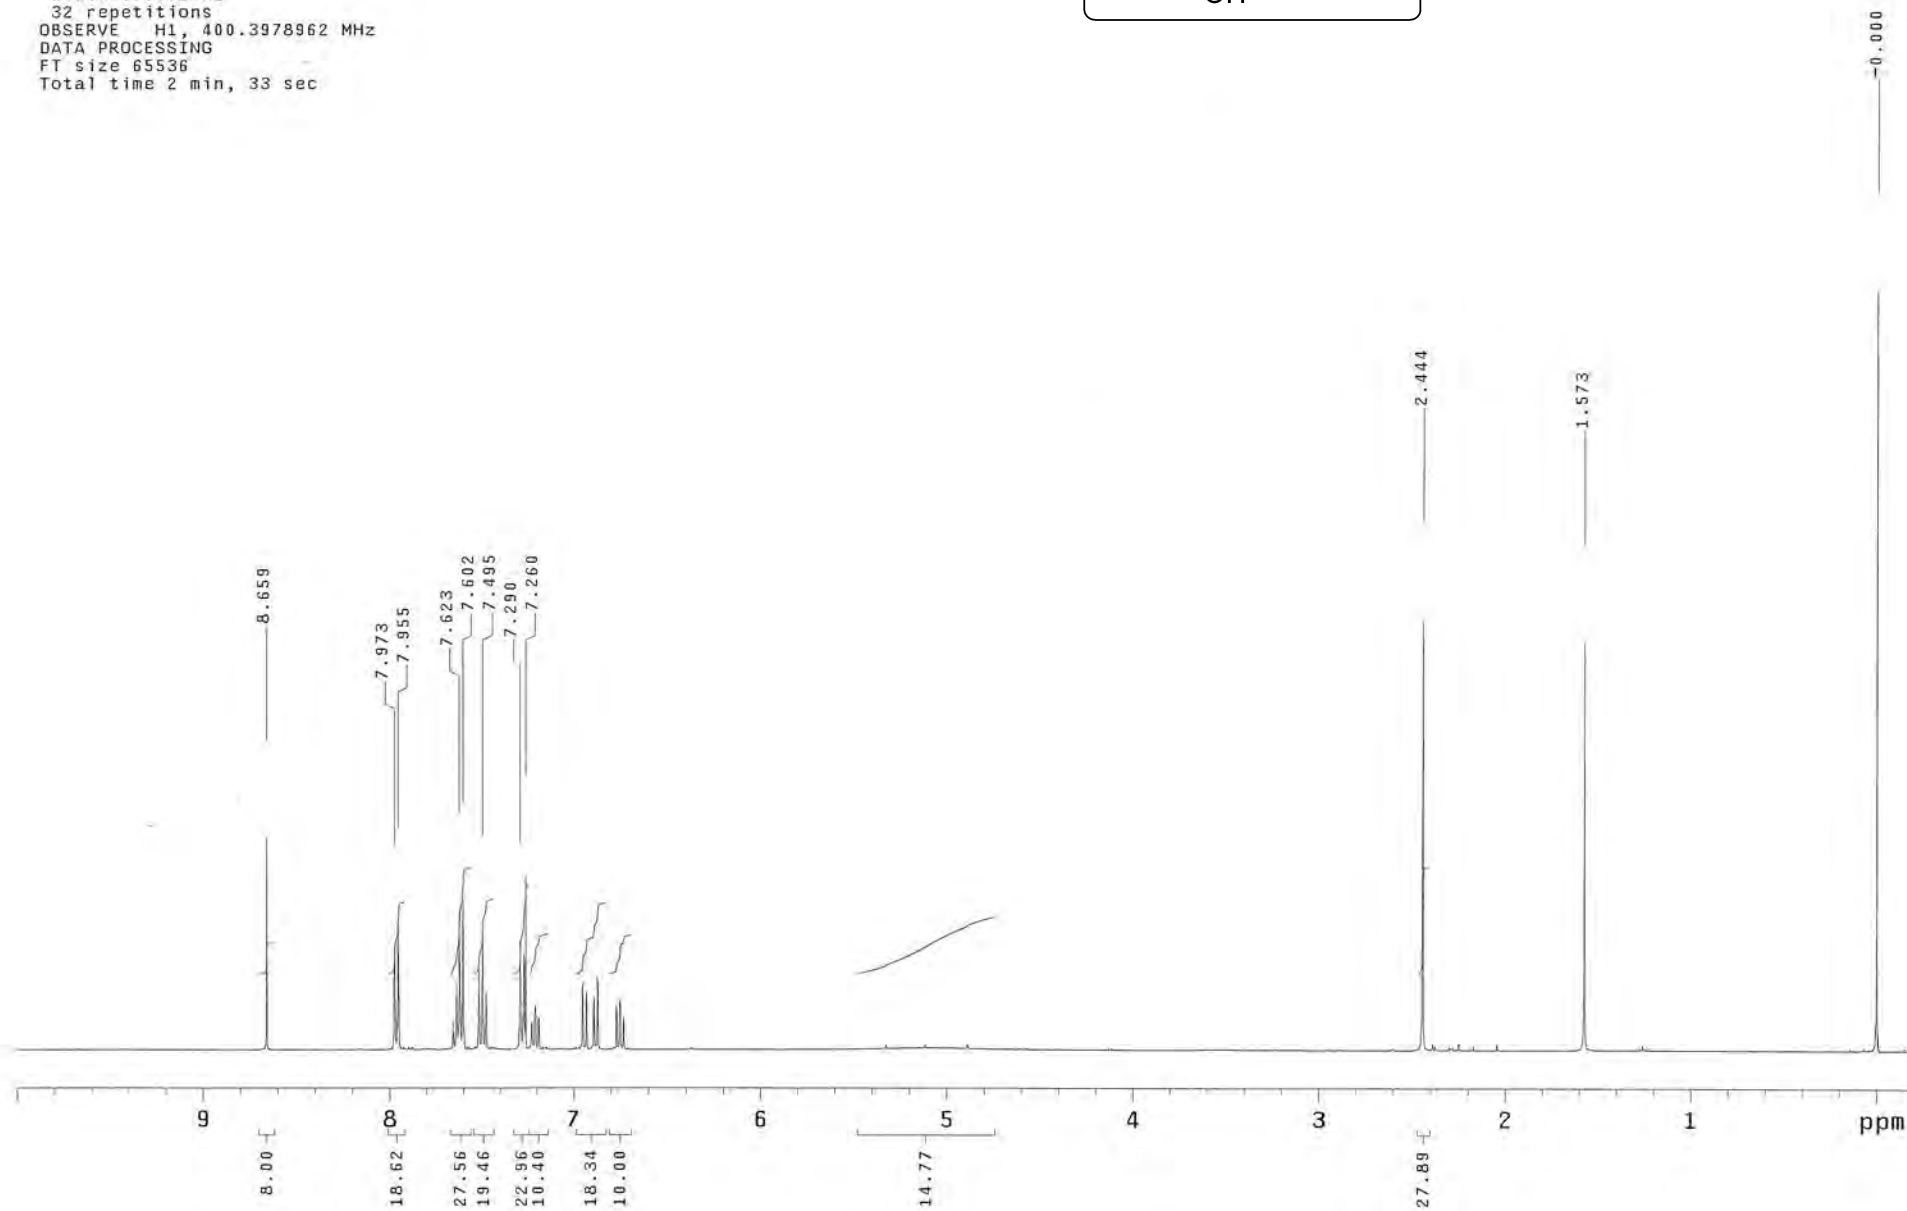

SIVA-RP3-29

Pulse Sequence: s2pu1

Solvent: CDCl3

Ambient temperature

Mercury-400BB "MercuryPlus400"

Pulse 68.7 degrees

Acq. time 1.000 sec

Width 25000.0 Hz

3376 repetitions

OBSERVE C13, 100.6801315 MHz

DECOUPLE H1, 400.3999572 MHz

Power 38 dB

continuously on

WALTZ-16 modulated

DATA PROCESSING

Line broadening 1.0 Hz

FT size 65536

Total time 21 hr, 51 min, 34 sec

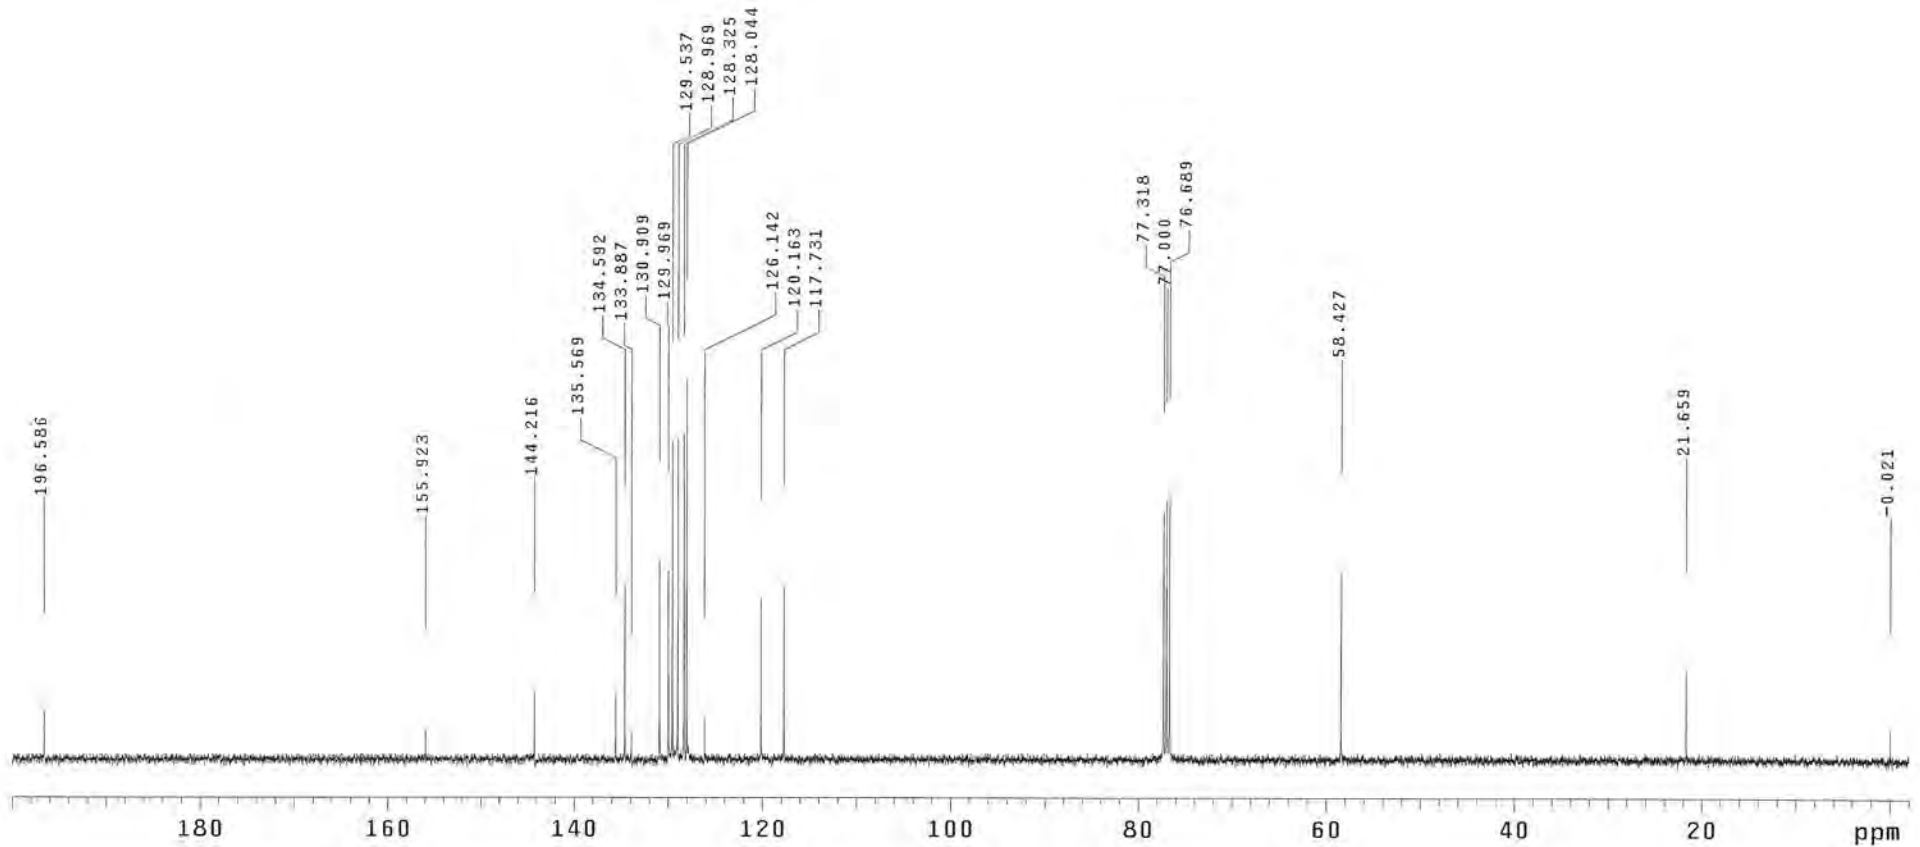

SIVA-RP4-186

Pulse Sequence: s2pu1

Mercury-400BB "MercuryPlus400"

Date: May 2 2014

Solvent: CDC13

Ambient temperature

Total 32 repetitions

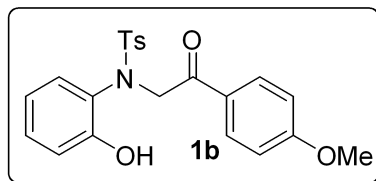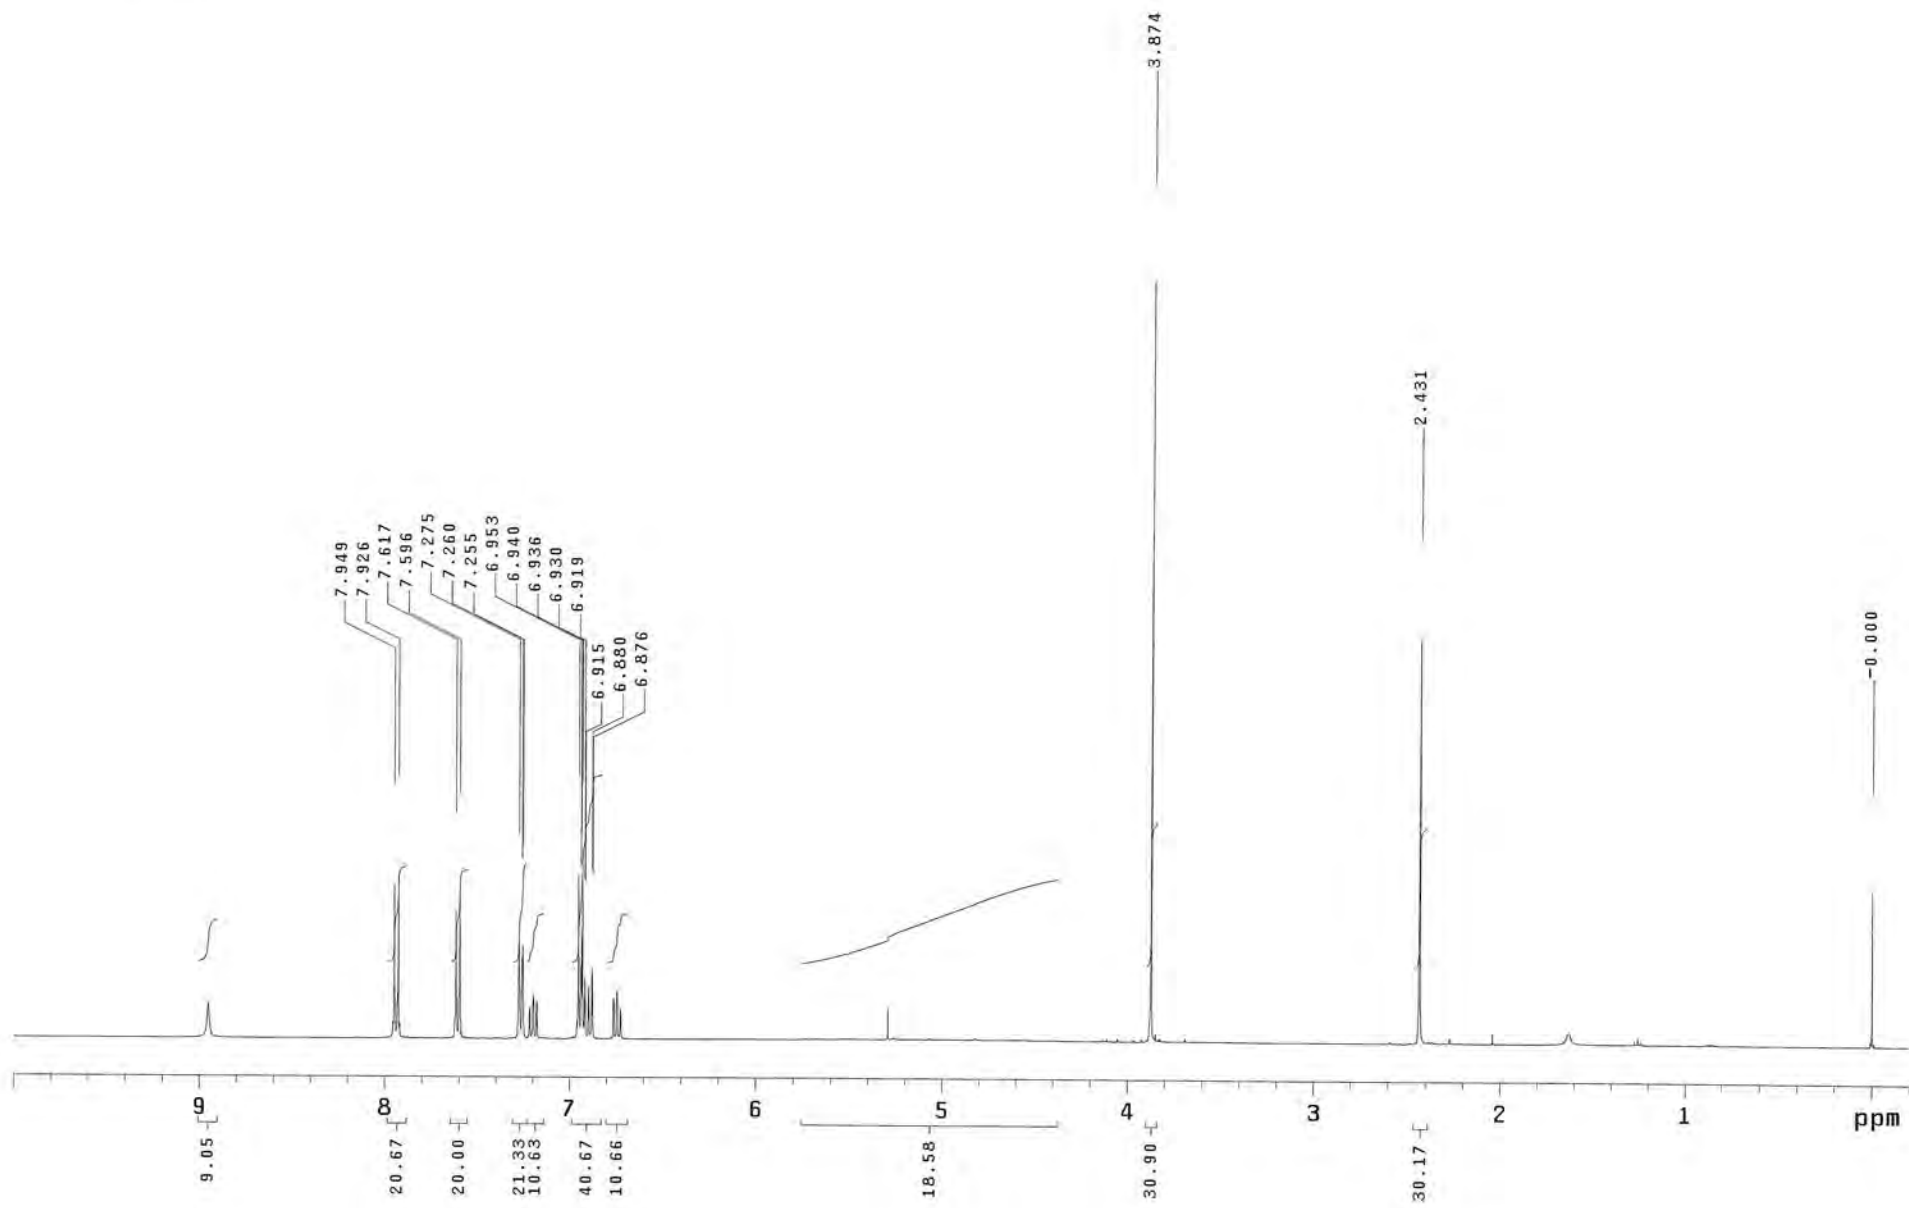

SIVA-RP4-186

Pulse Sequence: s2pu1

Mercury-400BB "MercuryPlus400"

Date: May 2 2014

Solvent: CDCl3

Ambient temperature

Total 1344 repetitions

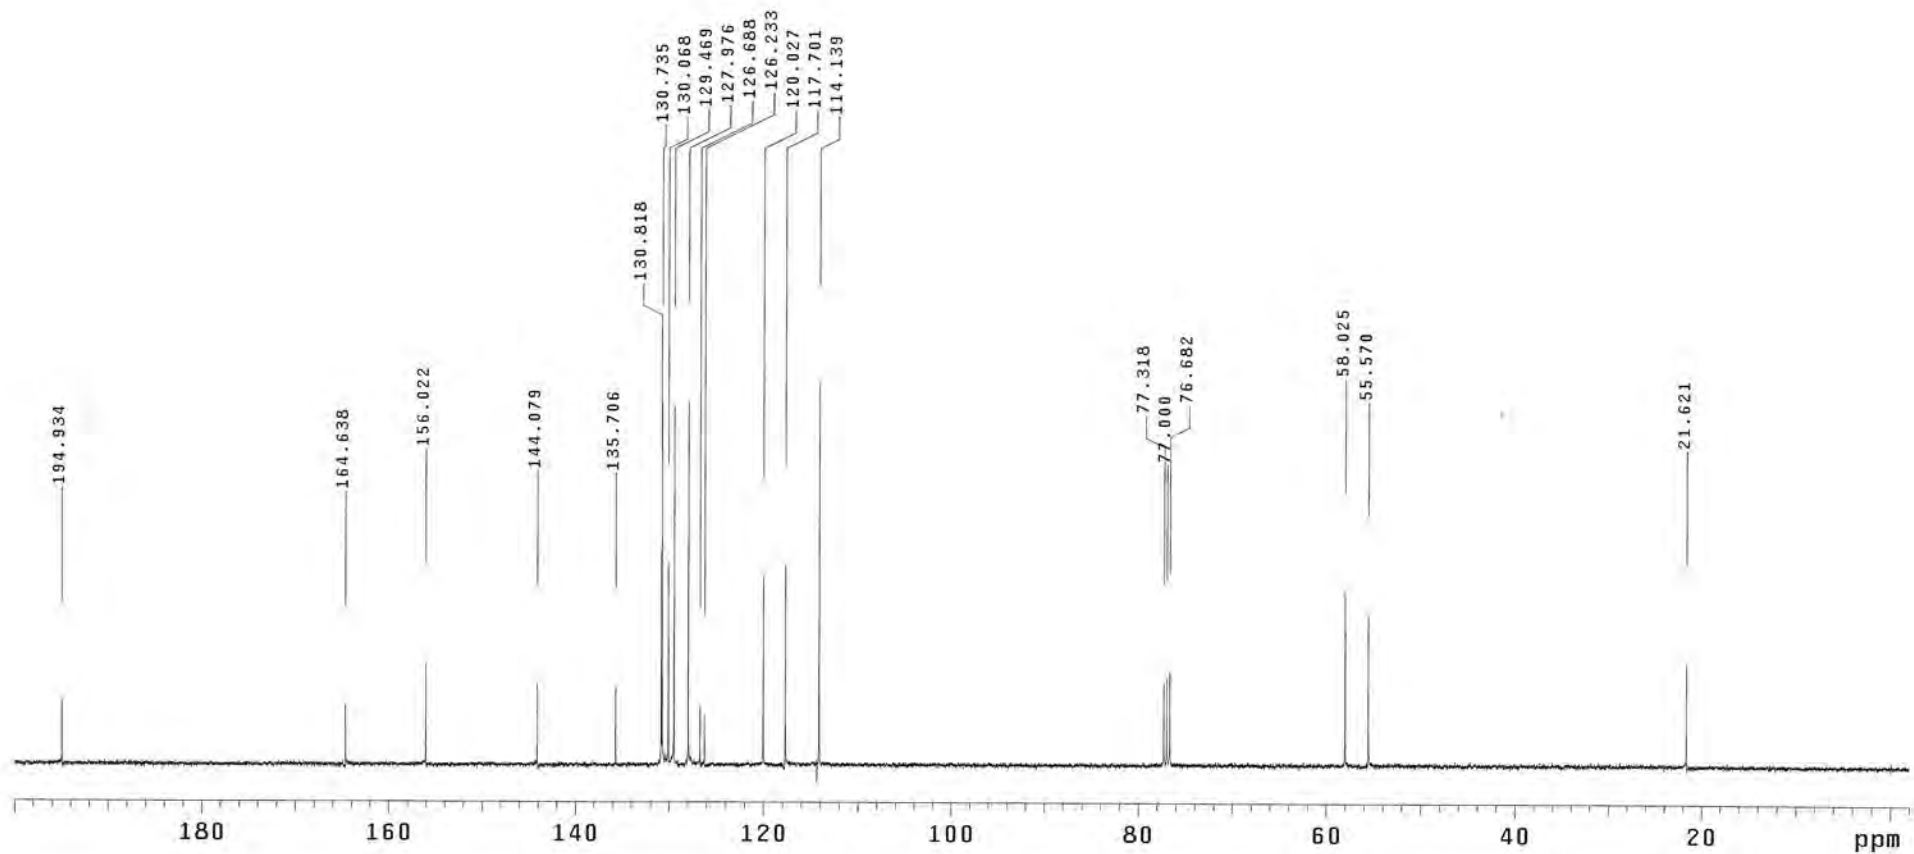

SIVA-RP3-114

Pulse Sequence: s2pu1

Solvent: CDCl3

Ambient temperature.

Mercury-400BB "MercuryPlus400"

Pulse 48.1 degrees

Acq. time 4.002 sec

Width 5995.2 Hz

64 repetitions

OBSERVE H1, 400.3978963 MHz

DATA PROCESSING

FT size 65536

Total time 5 min, 7 sec

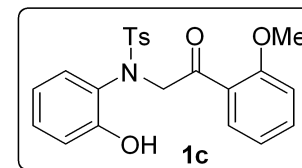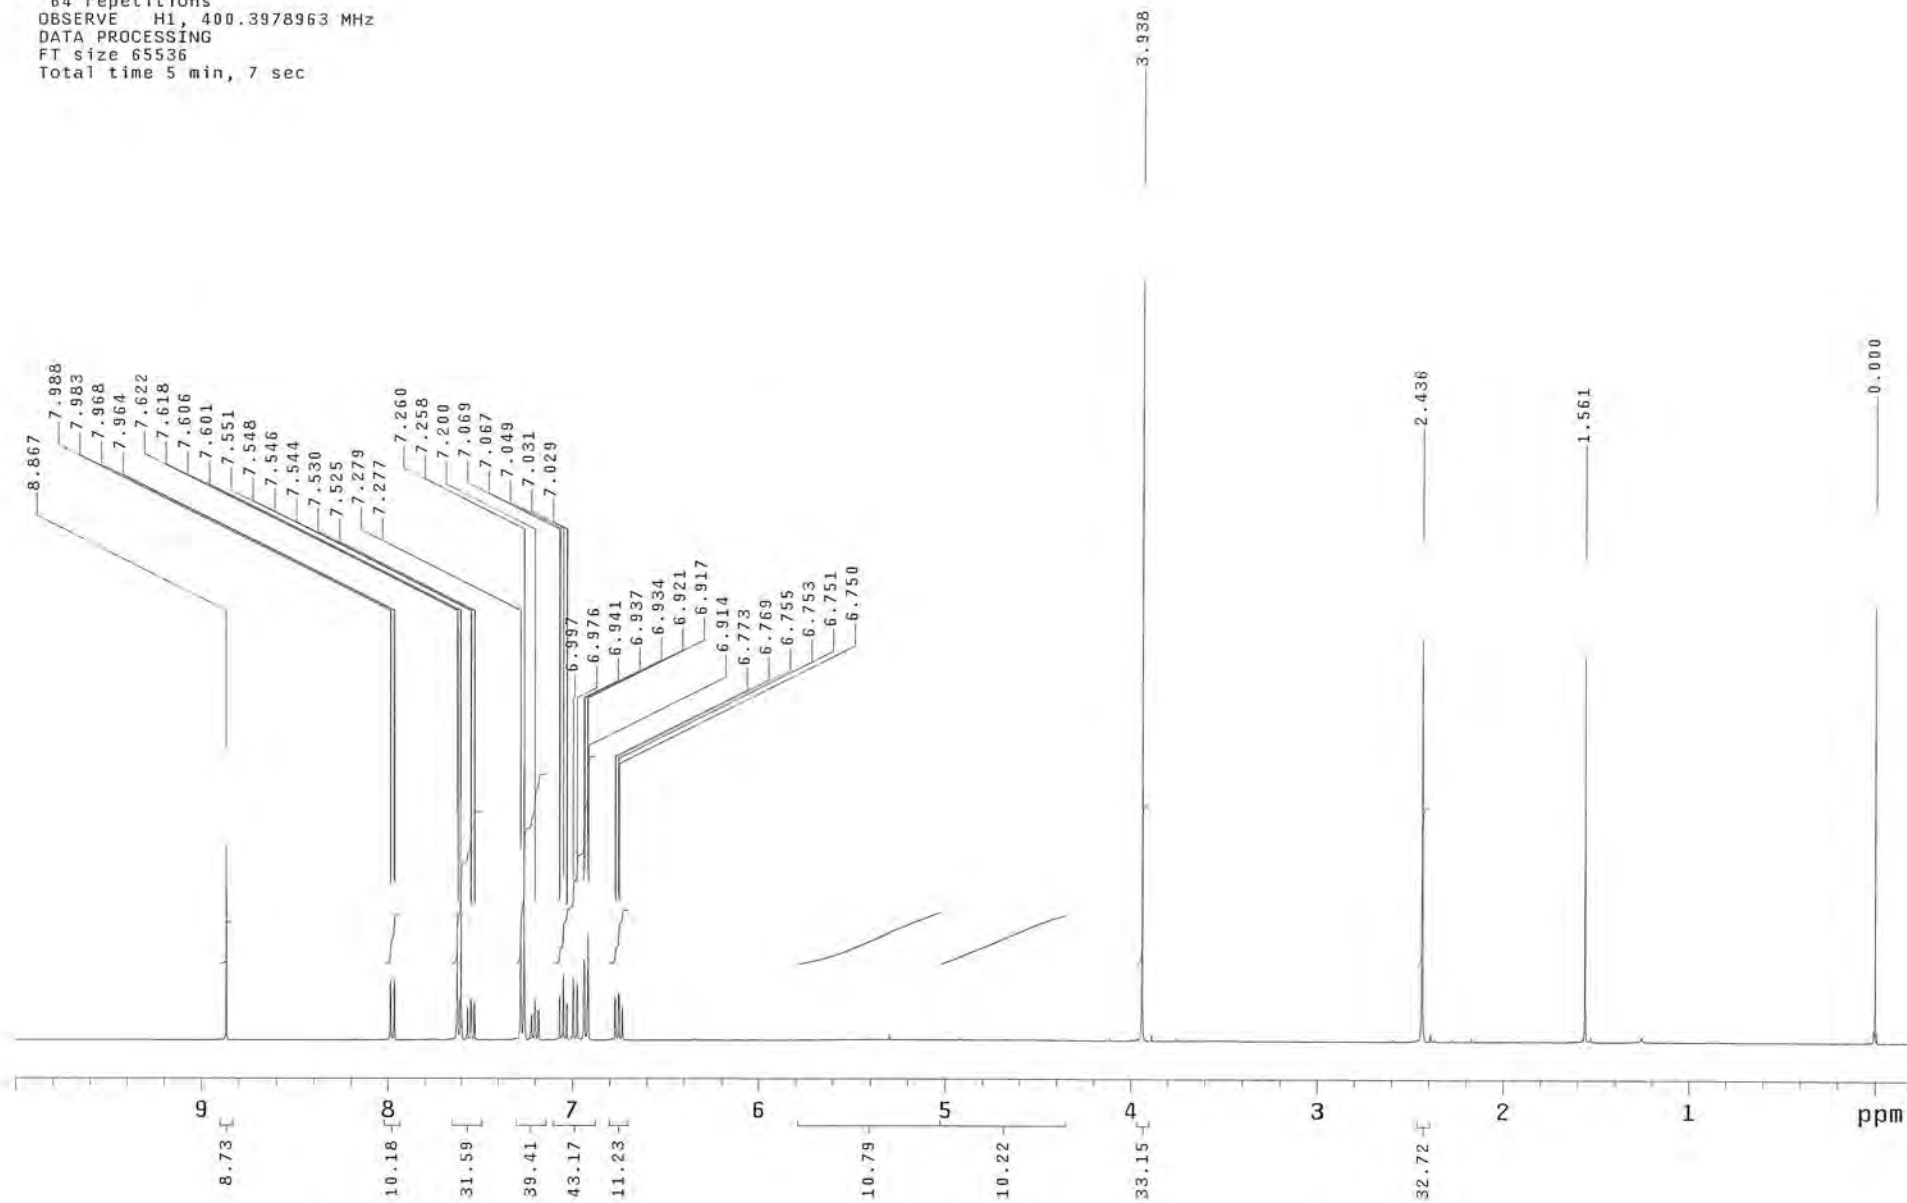



SIVA-RP3-114

Pulse Sequence: s2pu1

Solvent: CDCl3

Ambient temperature

Mercury-400BB "MercuryPlus400"

Pulse 68.7 degrees

Acq. time 1.000 sec

Width 25000.0 Hz

5312 repetitions

OBSERVE C13, 100.6801315 MHz

DECOUPLE H1, 400.3999572 MHz

Power 38 dB

continuously on

WALTZ-16 modulated

DATA PROCESSING

Line broadening 1.0 Hz

FT size 65536

Total time 21 hr, 51 min, 34 sec

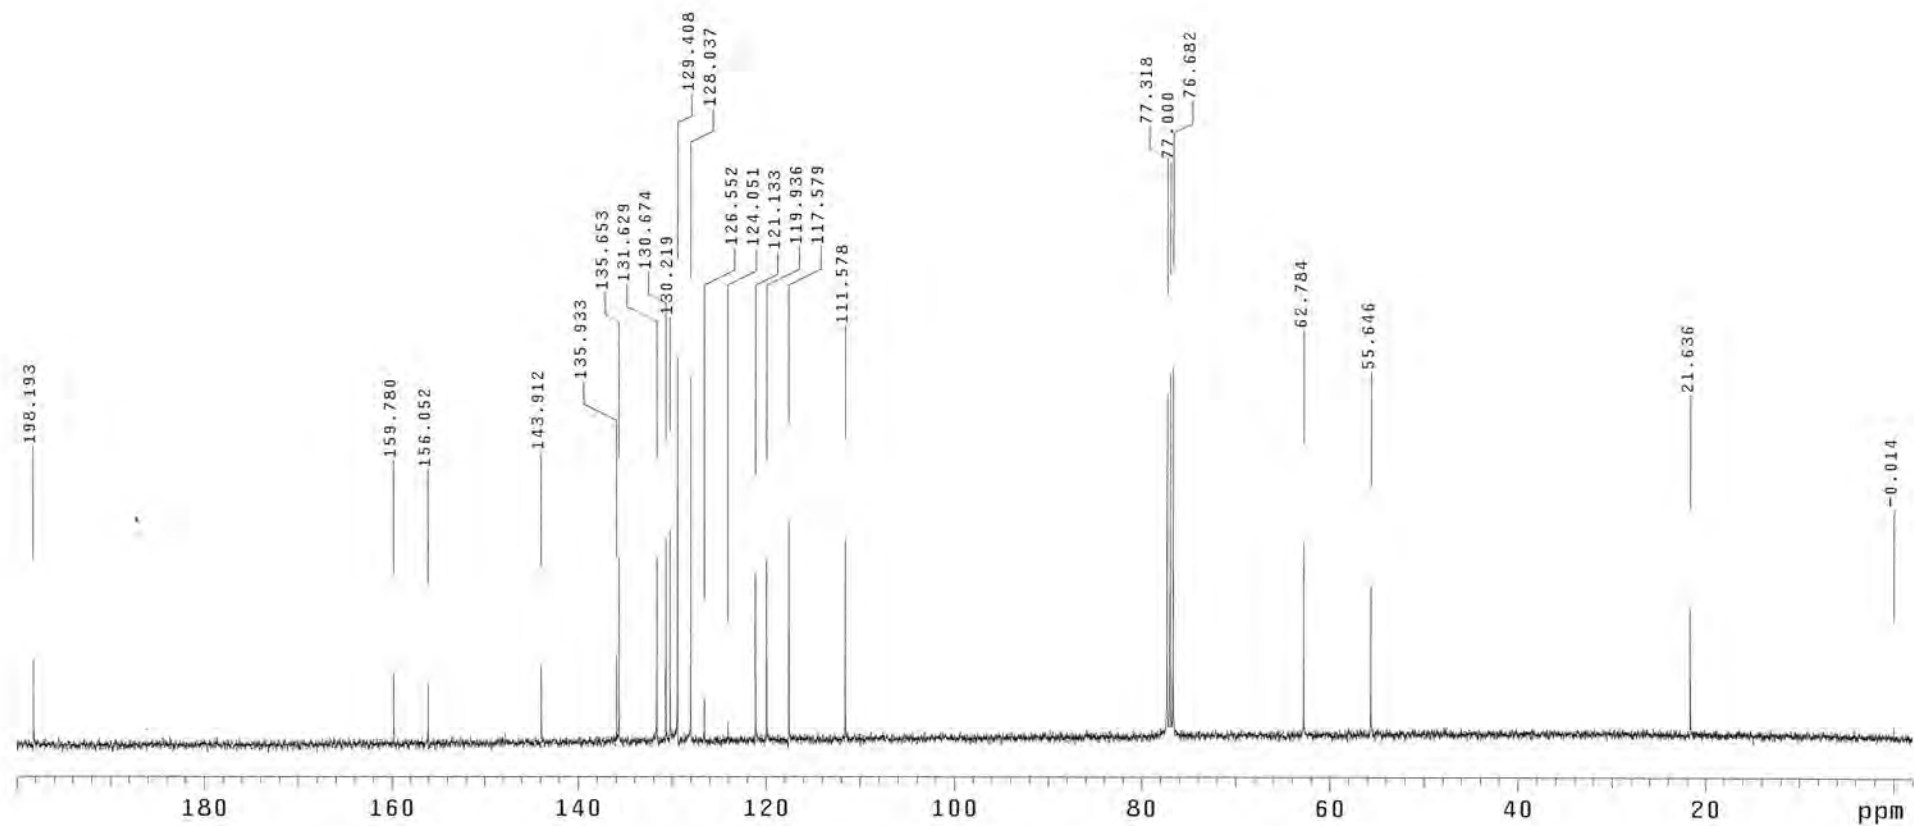

SIVA-RP3-009

Pulse Sequence: s2pu1

Mercury-400BB "MercuryPlus400"

Date: Mar 17 2014

Solvent: CDCl3

Ambient temperature

Total 32 repetitions

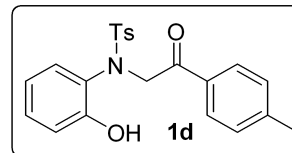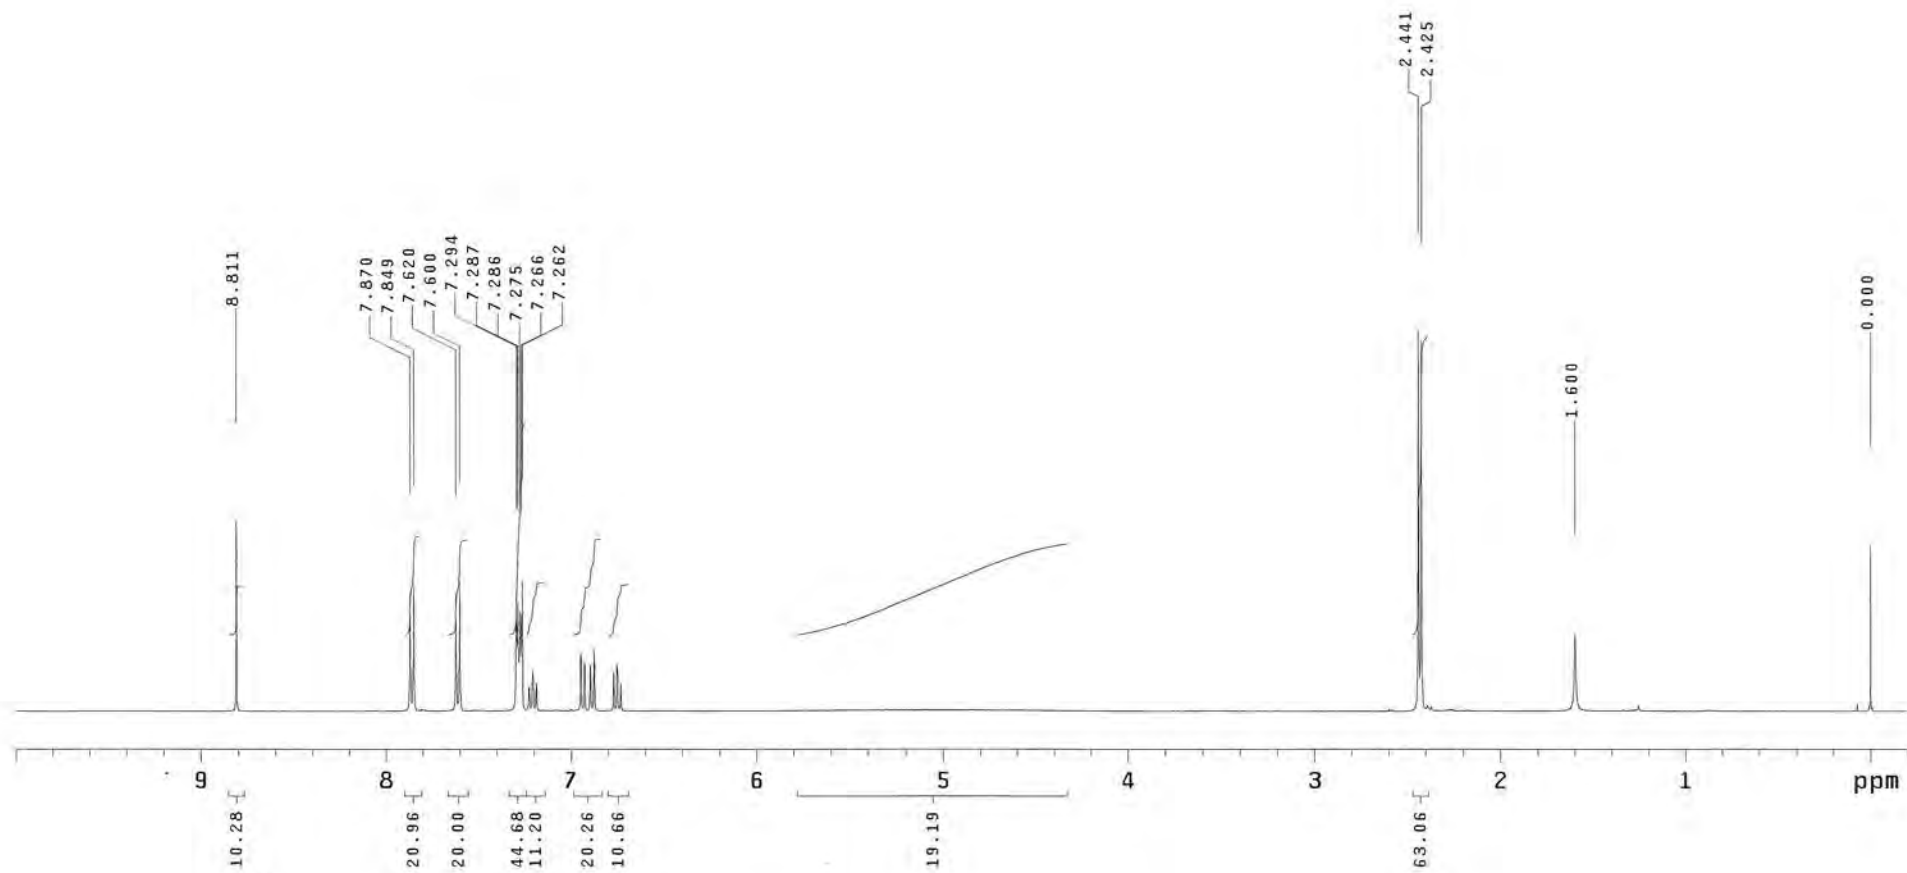

SIVA-RP3-009

Pulse Sequence: s2pu1

Mercury-400BB "MercuryPlus400"

Date: Mar 17 2014

Solvent: CDCl3

Ambient temperature

Total 6176 repetitions

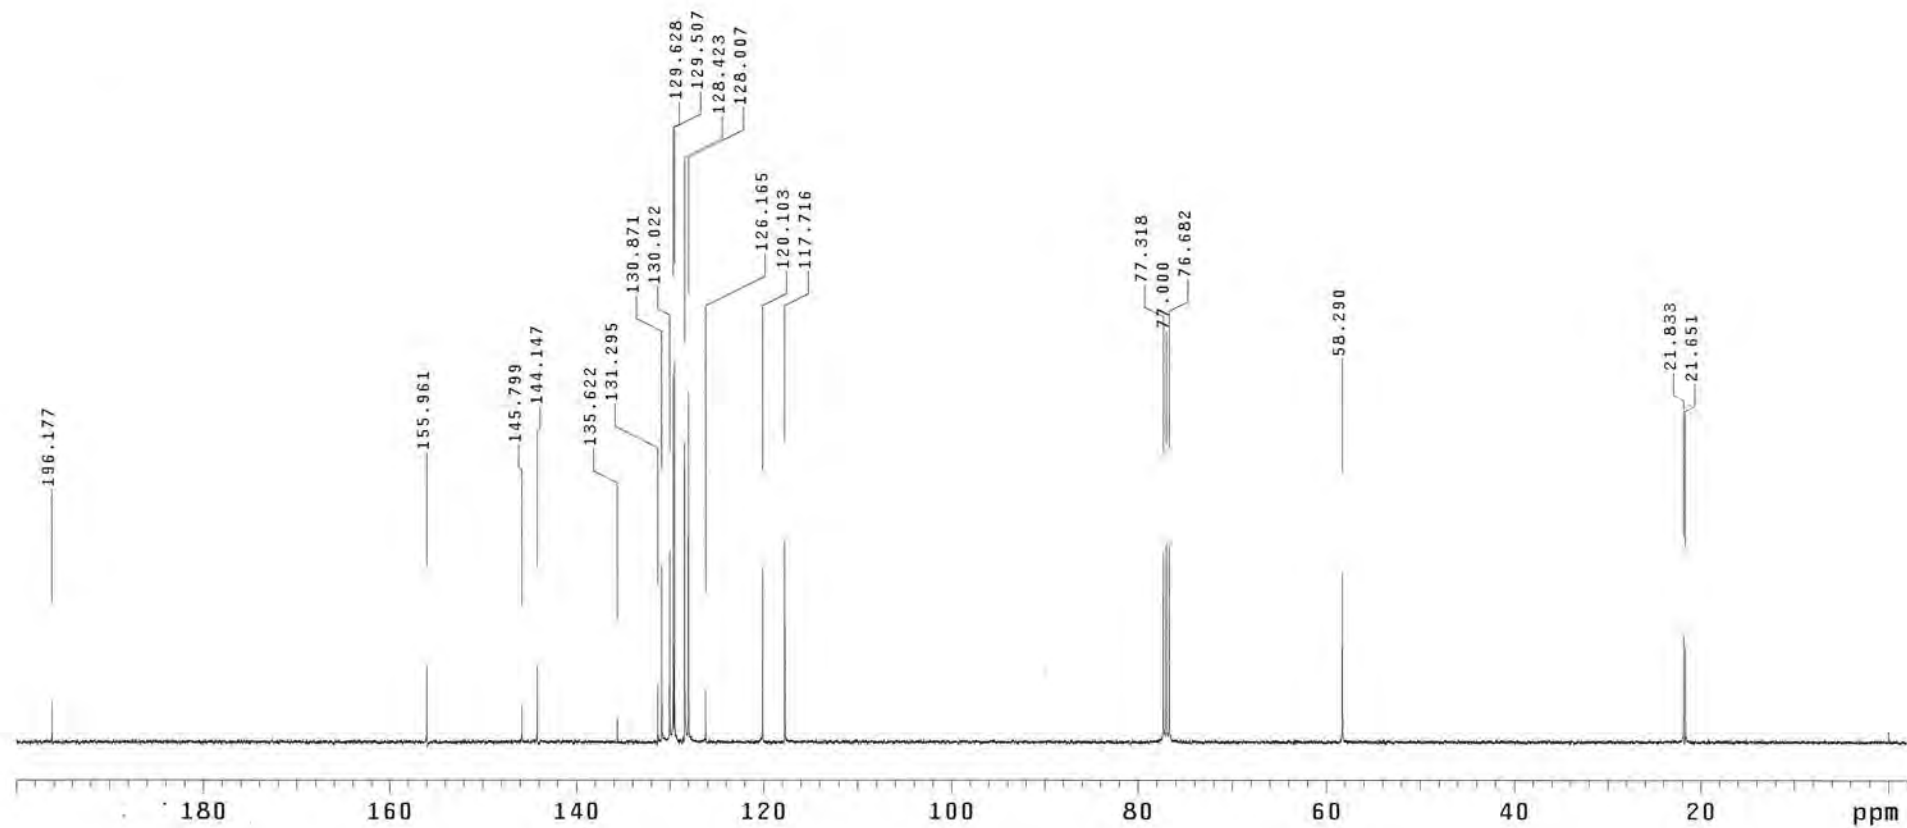

SIVA-RP3-64

Pulse Sequence: s2pu1

UNITYplus-400 "unity400"

Date: Aug 19 2013

Solvent: CDCl3

Ambient temperature

Total 64 repetitions

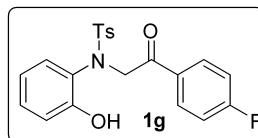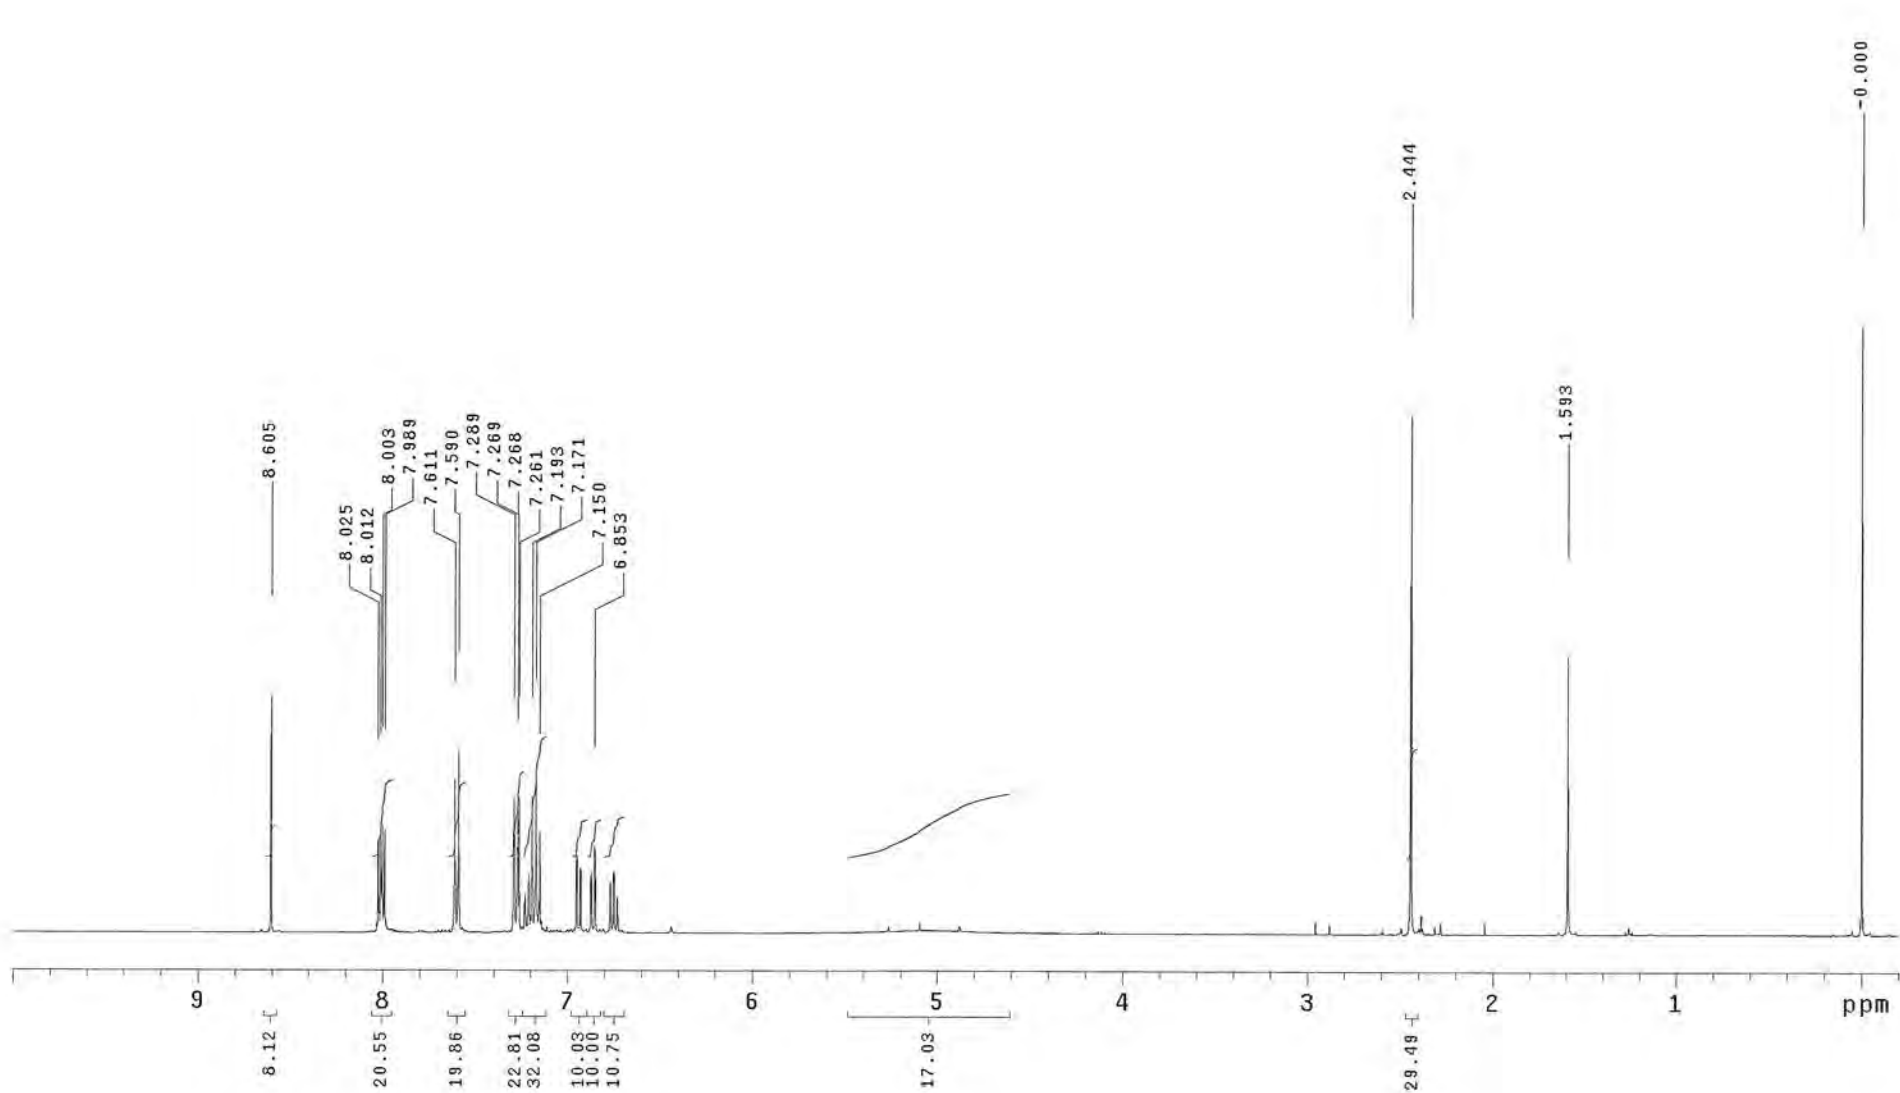

SIVA-RP3-64

Pulse Sequence: s2pu1

UNITYplus-400 "unity400"

Date: Aug 19 2013

Solvent: CDCl3

Ambient temperature

Total 32000 repetitions

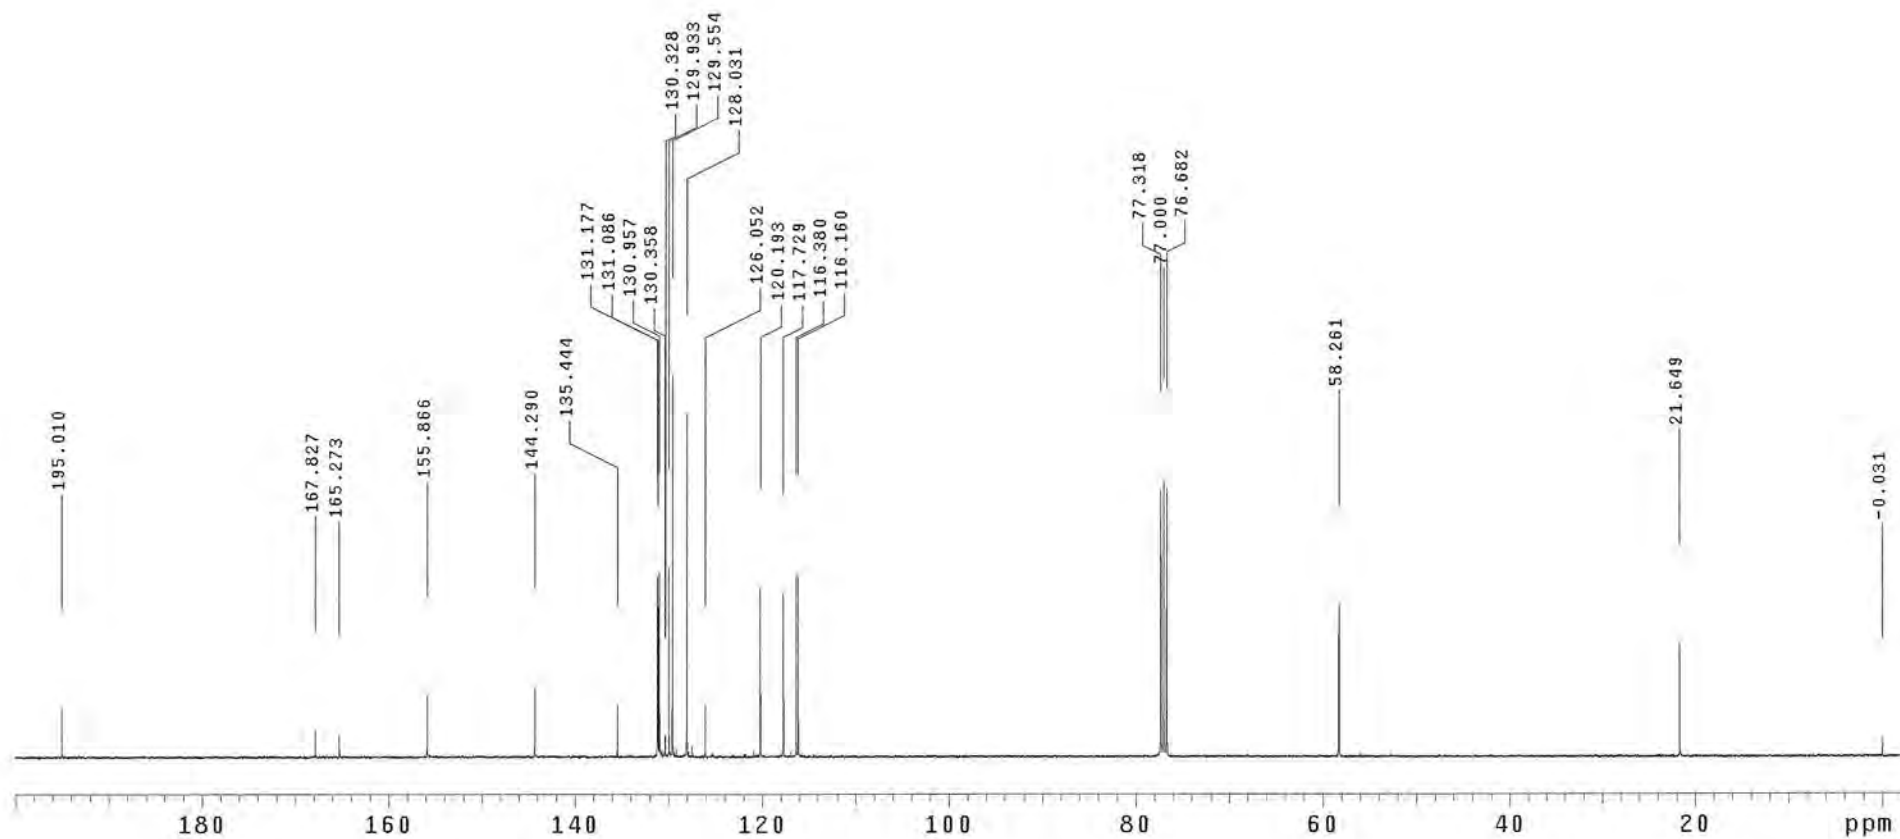

SIVA-RP4-121

Pulse Sequence: s2pu1

Mercury-400BB "MercuryPlus400"

Date: May 2 2014

Solvent: CDCl<sub>3</sub>

Ambient temperature

Total 32 repetitions

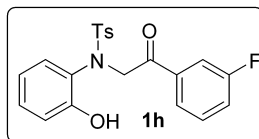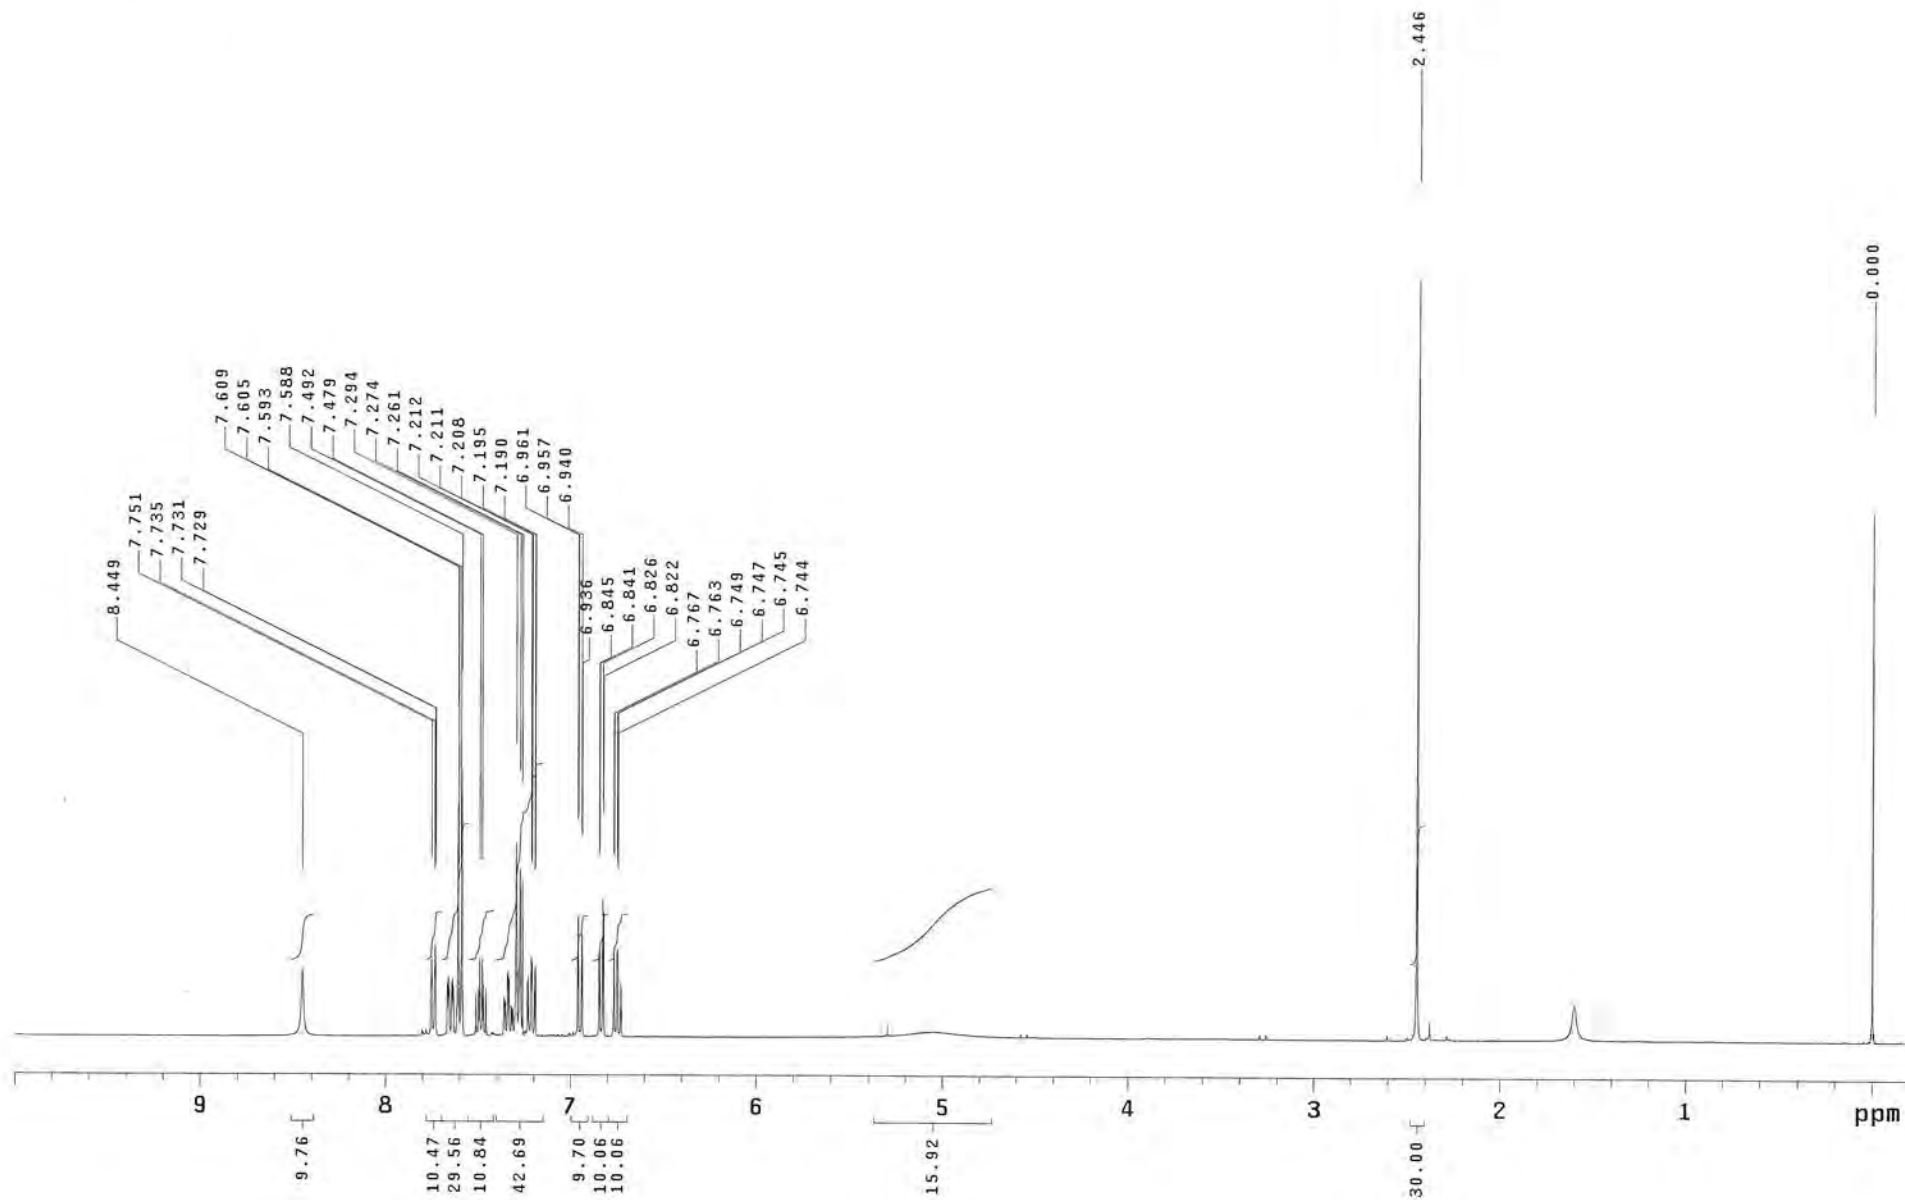

SIVA-RP4-121

Pulse Sequence: s2pu1

Mercury-400BB "MercuryPlus400"

Date: May 2 2014

Solvent: CDCl3

Ambient temperature

Total 7760 repetitions

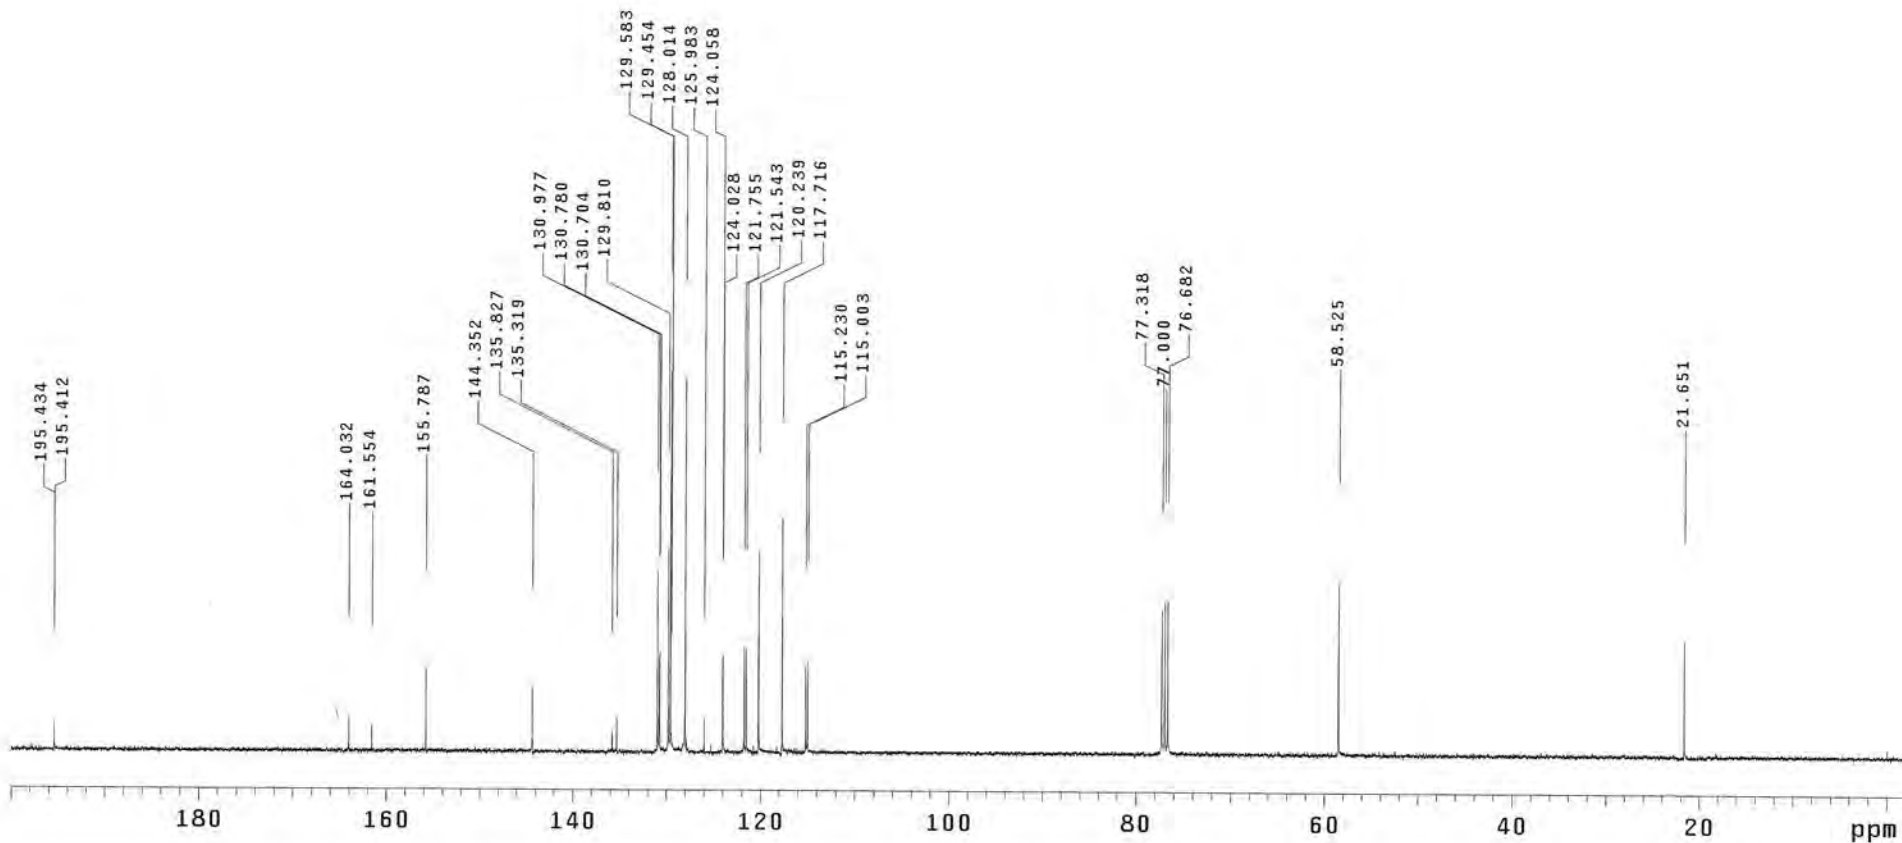

SIVA-RP3-37

Pulse Sequence: s2pu1

Solvent: CDCl3

Ambient temperature

Mercury-400BB "MercuryPlus400"

Pulse 48.1 degrees

Acq. time 4.002 sec

Width 5995.2 Hz

64 repetitions

OBSERVE H1, 400.3978960 MHz

DATA PROCESSING

FT size 65536

Total time 5 min, 7 sec

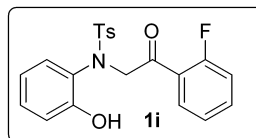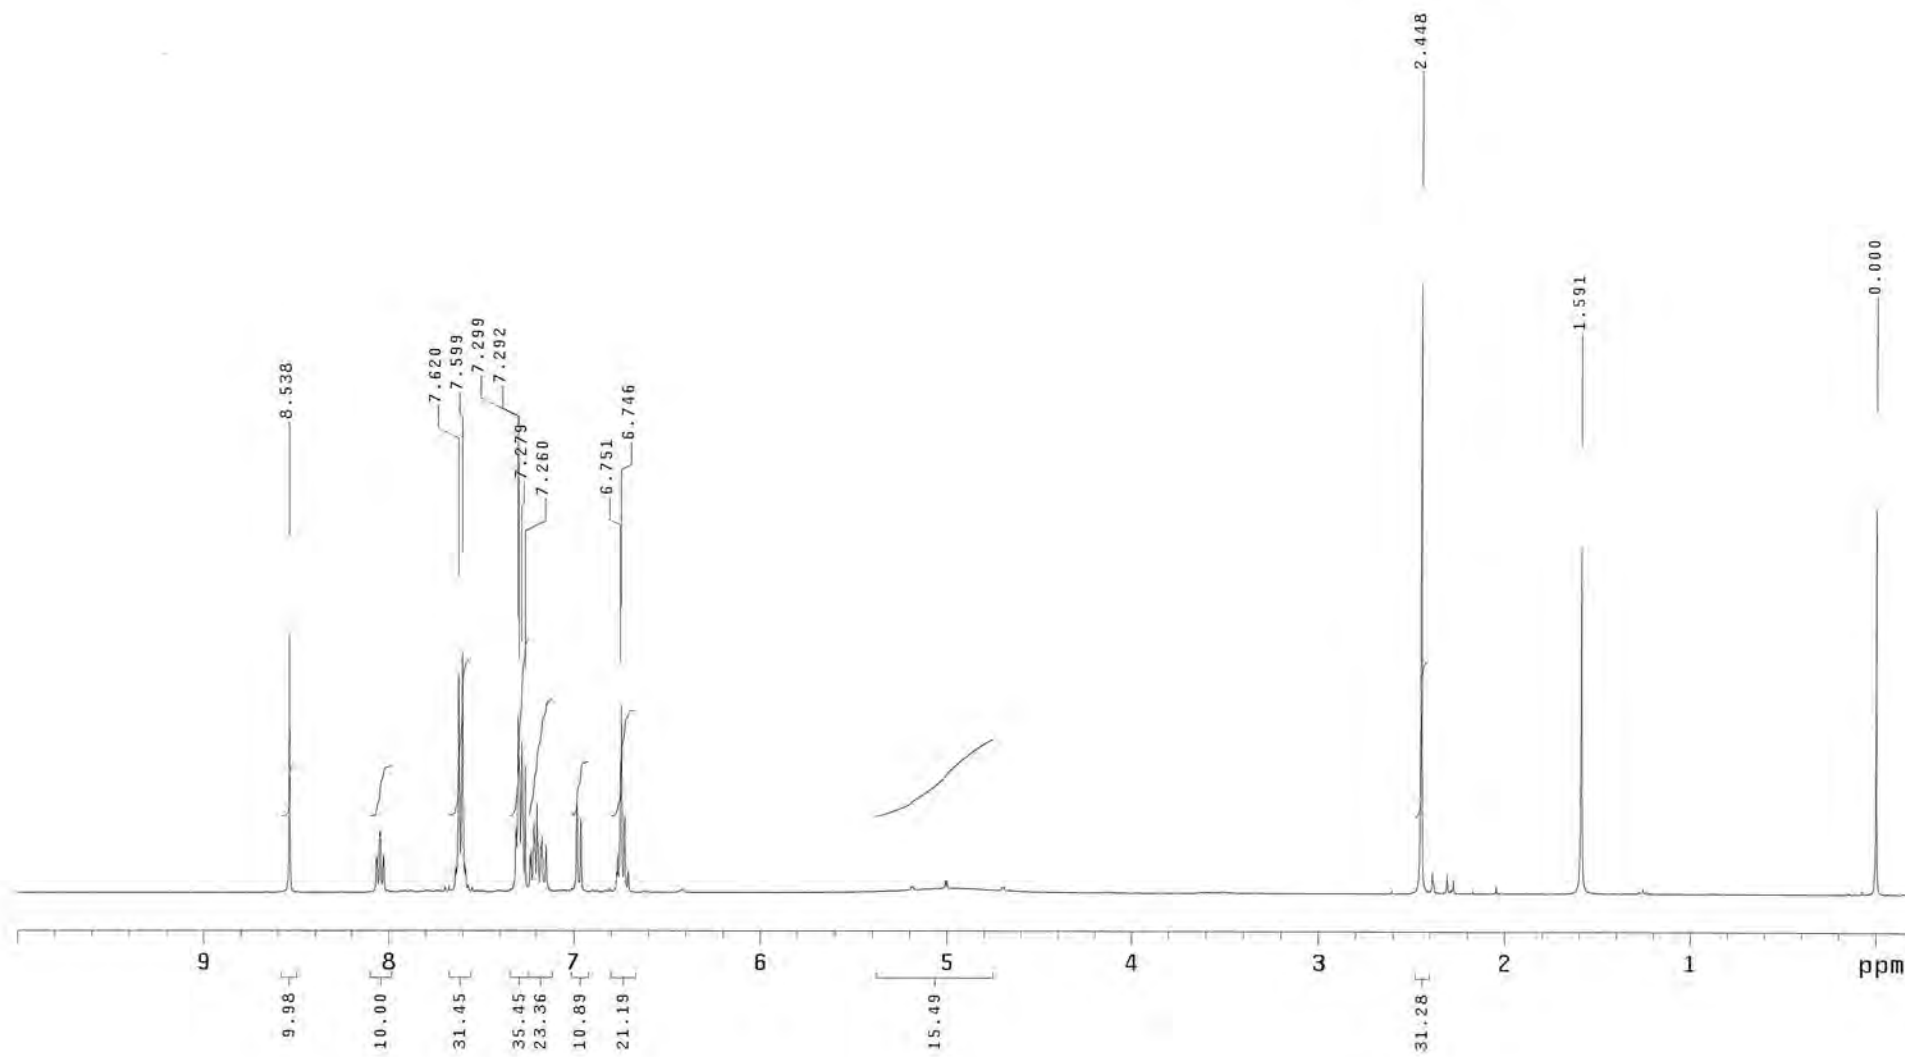



SIVA-RP3-37

Pulse Sequence: s2pu1

Solvent: CDCl3

Ambient temperature

Mercury-400BB "MercuryPlus400"

Relax. delay 0.500 sec

Pulse 68.7 degrees

Acq. time 1.000 sec

Width 25000.0 Hz

80 repetitions

OBSERVE C13, 100.6801323 MHz

DECOUPLE H1, 400.3999572 MHz

Power 38 dB

continuously on

WALTZ-16 modulated

DATA PROCESSING

Line broadening 1.0 Hz

FT size 65536

Total time 30 hr, 44 min, 54 sec

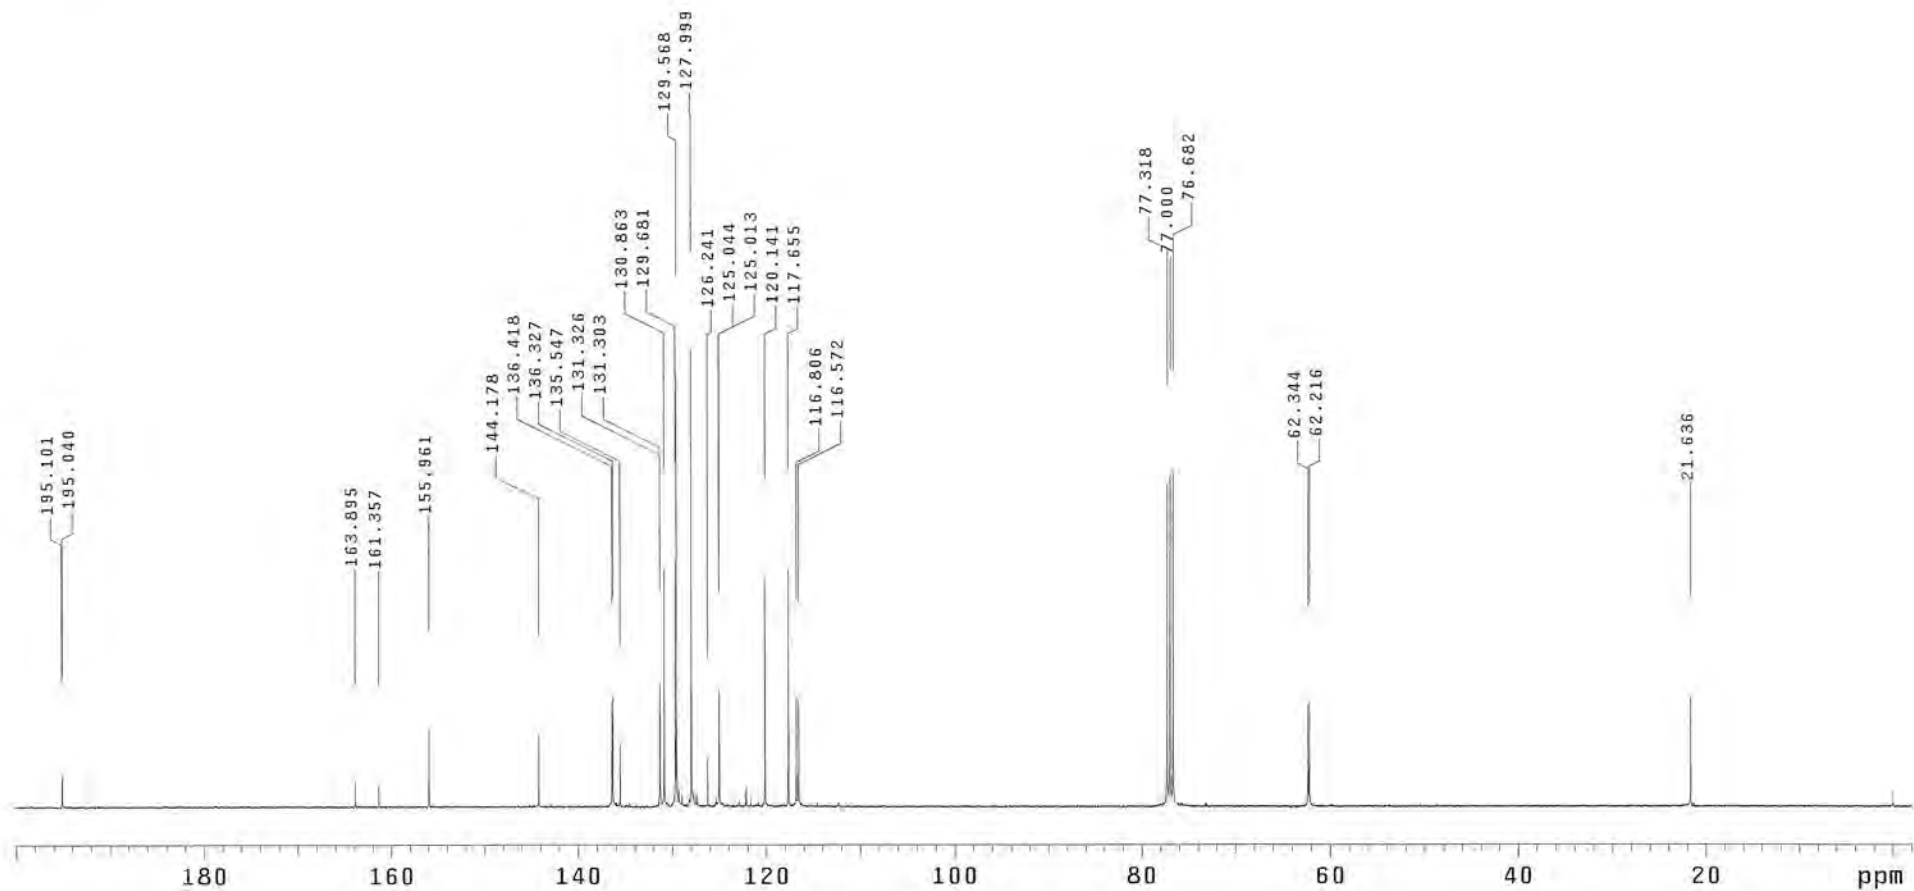

SIVA-RP4-080

Pulse Sequence: s2pul

Solvent: CDCl3

Ambient temperature

Mercury-400BB "MercuryPlus400"

Pulse 48.1 degrees

Acq. time 4.002 sec

Width 5995.2 Hz

64 repetitions

OBSERVE H1, 400.3978962 MHz

DATA PROCESSING

FT size 65536

Total time 5 min, 7 sec

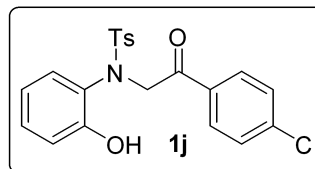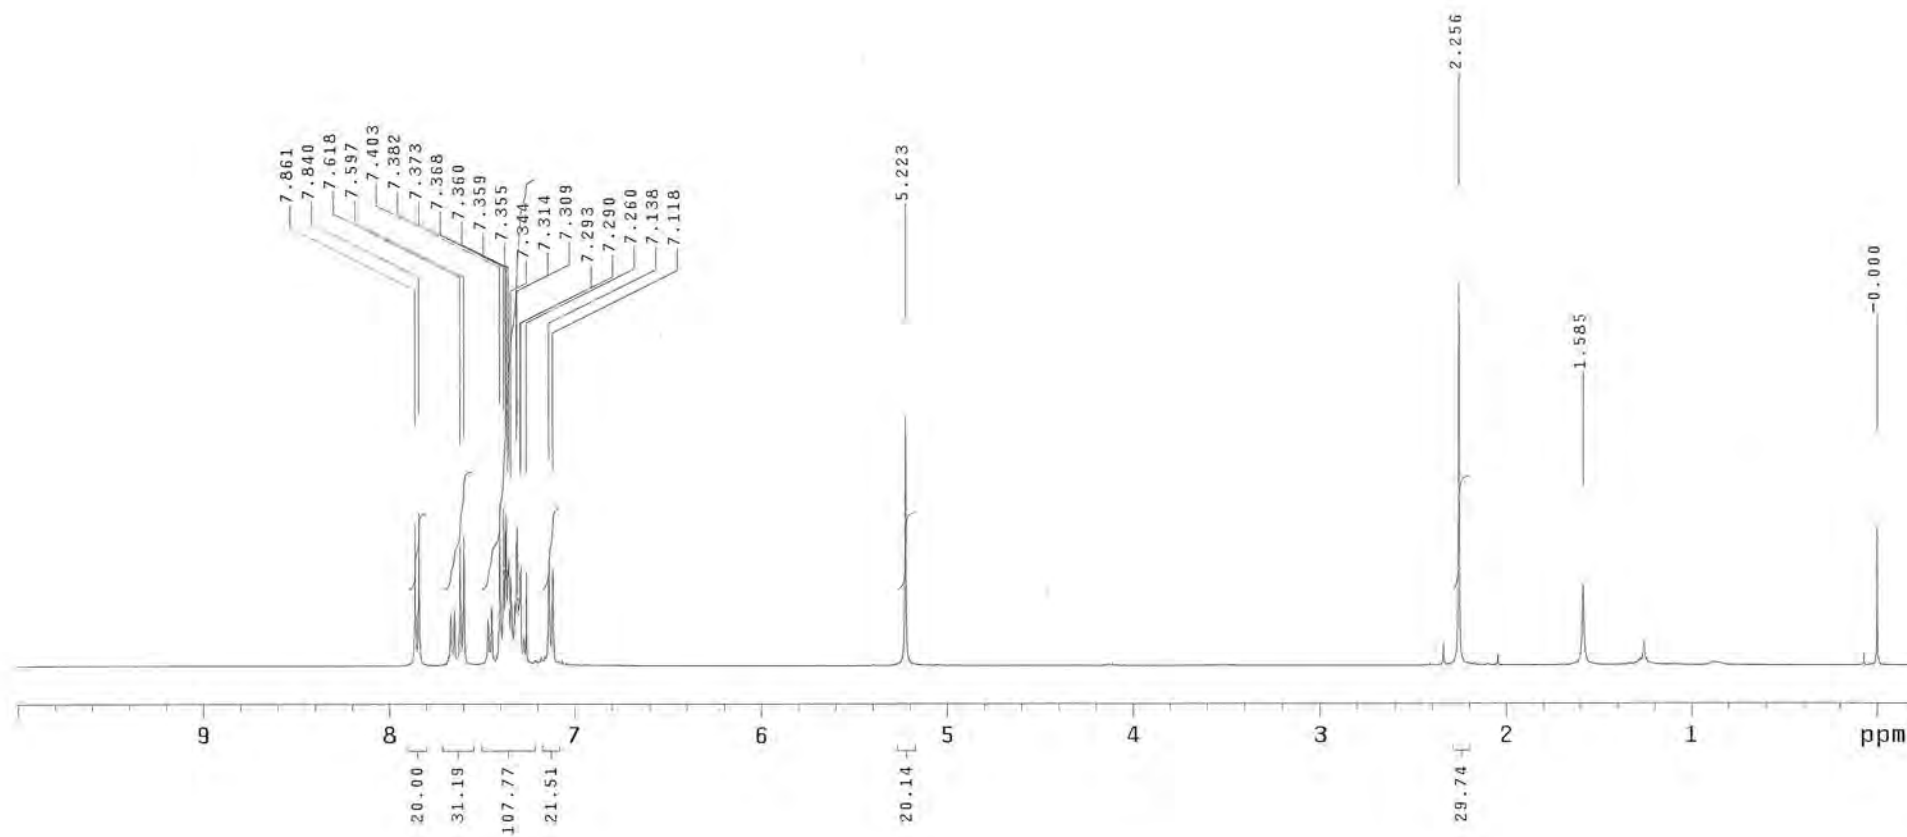

SIVA-RP4-080

Pulse Sequence: s2pul

Solvent: CDCl3

Ambient temperature

Mercury-400BB "MercuryPlus400"

Pulse 68.7 degrees

Acq. time 1.000 sec

Width 25000.0 Hz

336 repetitions

OBSERVE C13, 100.6801330 MHz

DECOUPLE H1, 400.3999572 MHz

Power 38 dB

continuously on

WALTZ-16 modulated

DATA PROCESSING

Line broadening 1.0 Hz

FT size 65536

Total time 21 hr, 51 min, 34 sec

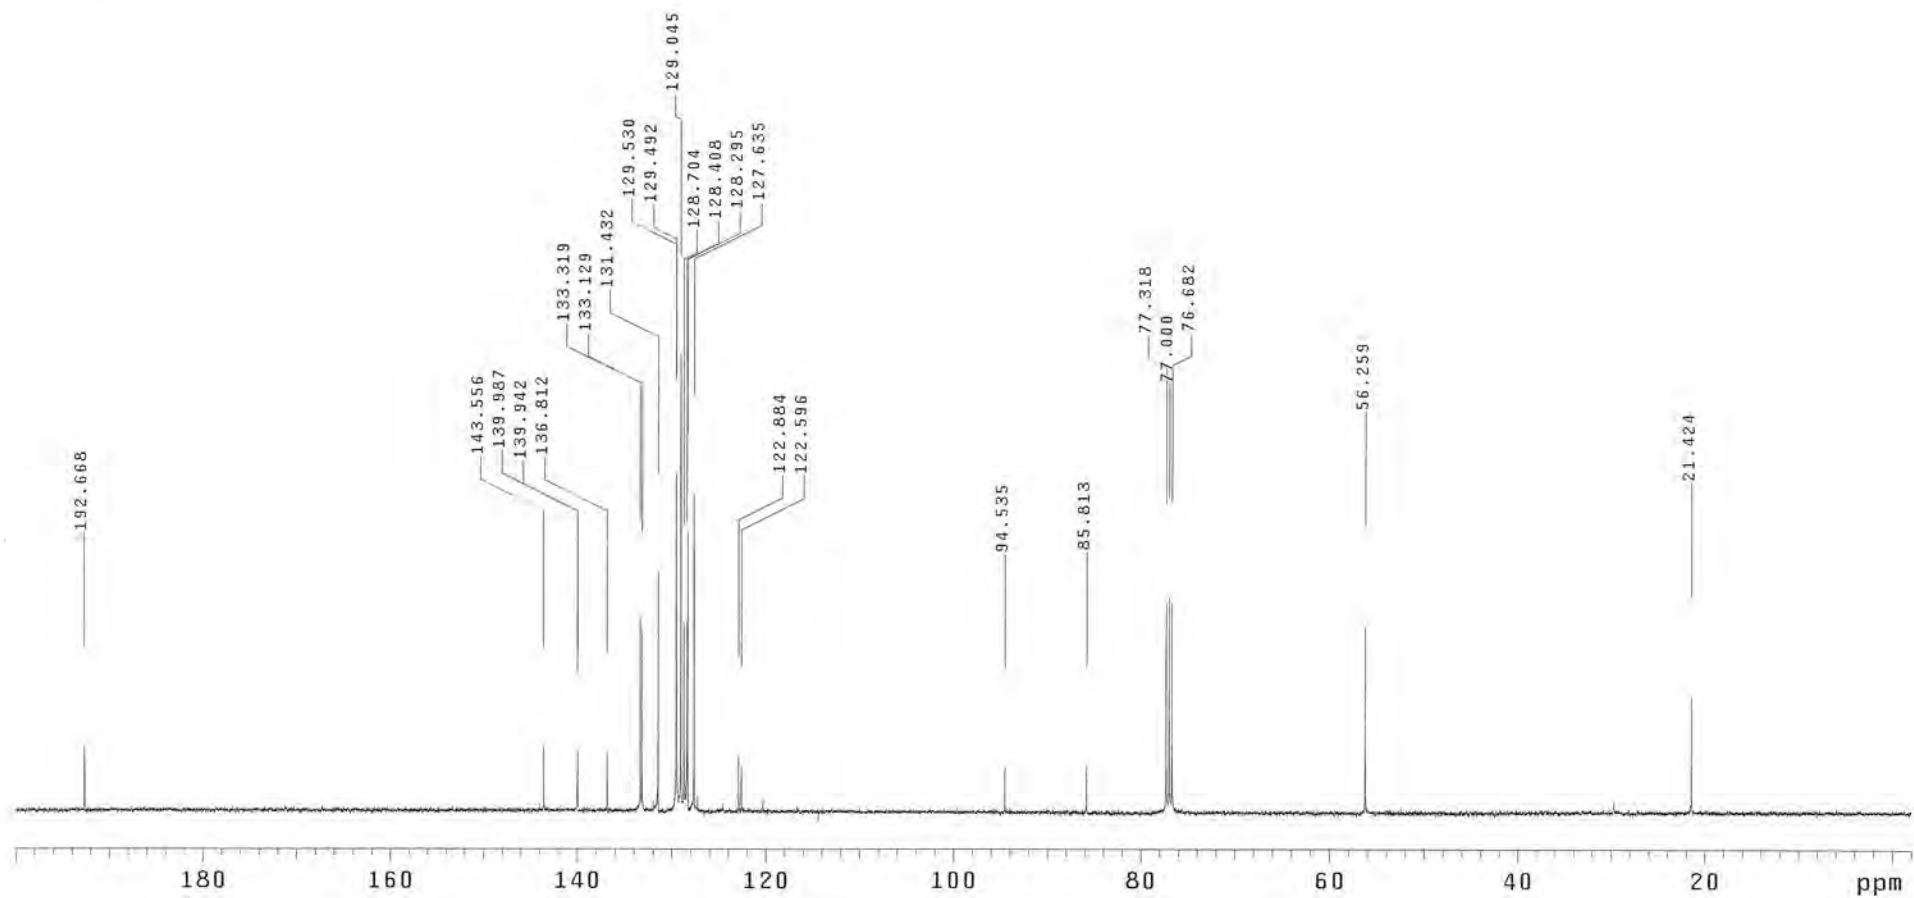

SIVA-RP4-057

Pulse Sequence: s2pu1

Mercury-400BB "MercuryPlus400"

Date: Mar 3 2014

Solvent: CDCl3

Ambient temperature

Total 64 repetitions

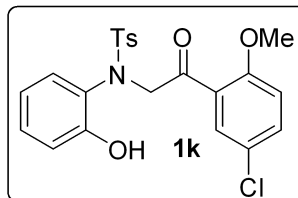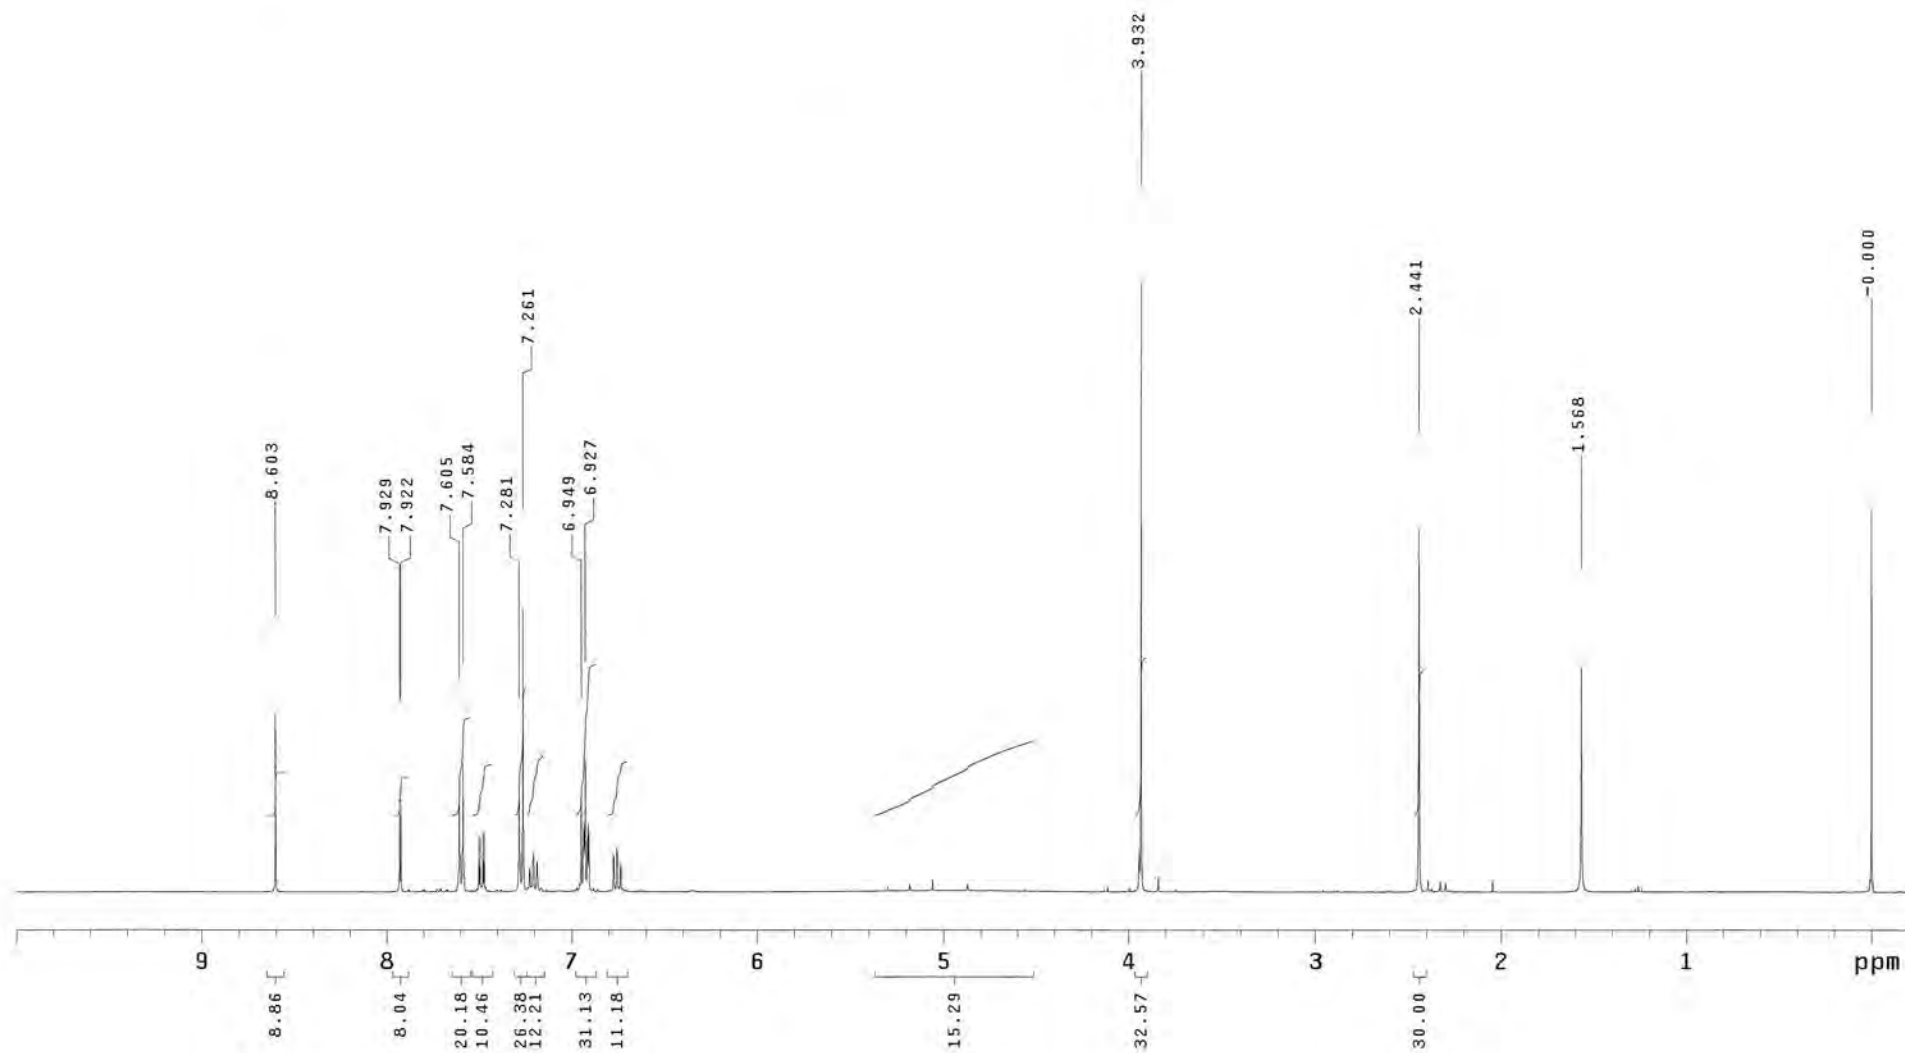

SIVA-RP4-057

Pulse Sequence: s2pu1

Mercury-400BB "MercuryPlus400"

Date: Mar 3 2014

Solvent: CDCl3

Ambient temperature

Total 3344 repetitions

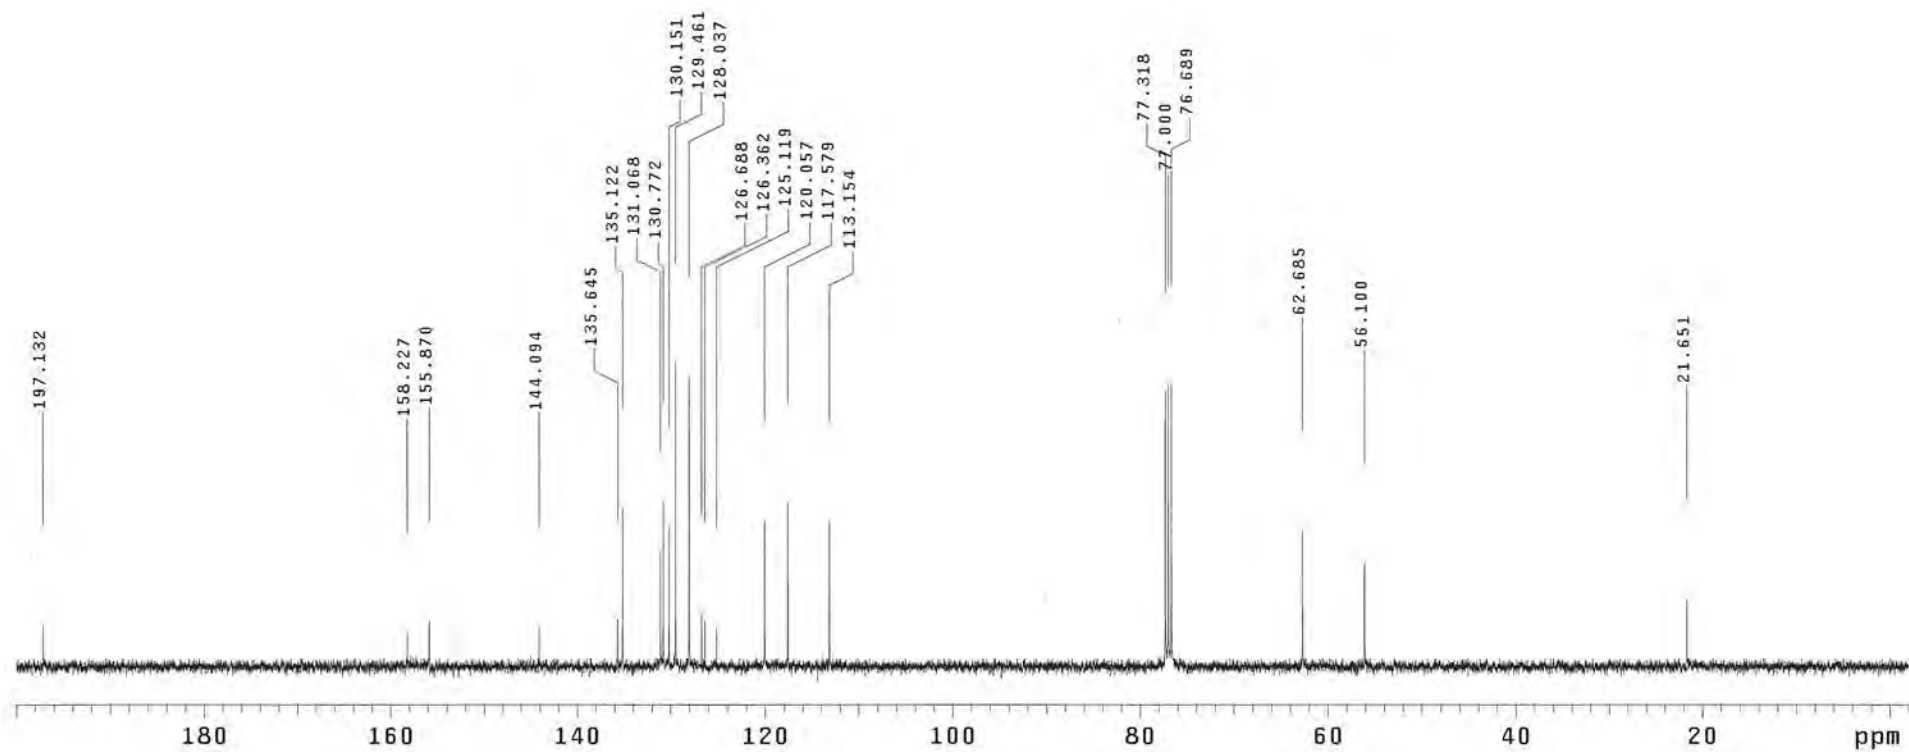

SIVA-RP3-58

Pulse Sequence: s2pu1

Solvent: CDCl3

Ambient temperature

Mercury-400BB "MercuryPlus400"

Pulse 48.1 degrees

Acq. time 4.002 sec

Width 5995.2 Hz

32 repetitions

OBSERVE H1, 400.3978956 MHz

DATA PROCESSING

FT size 65536

Total time 2 min, 33 sec

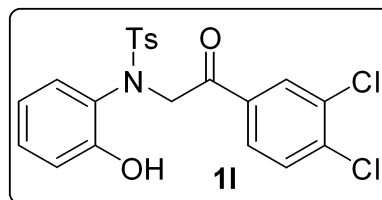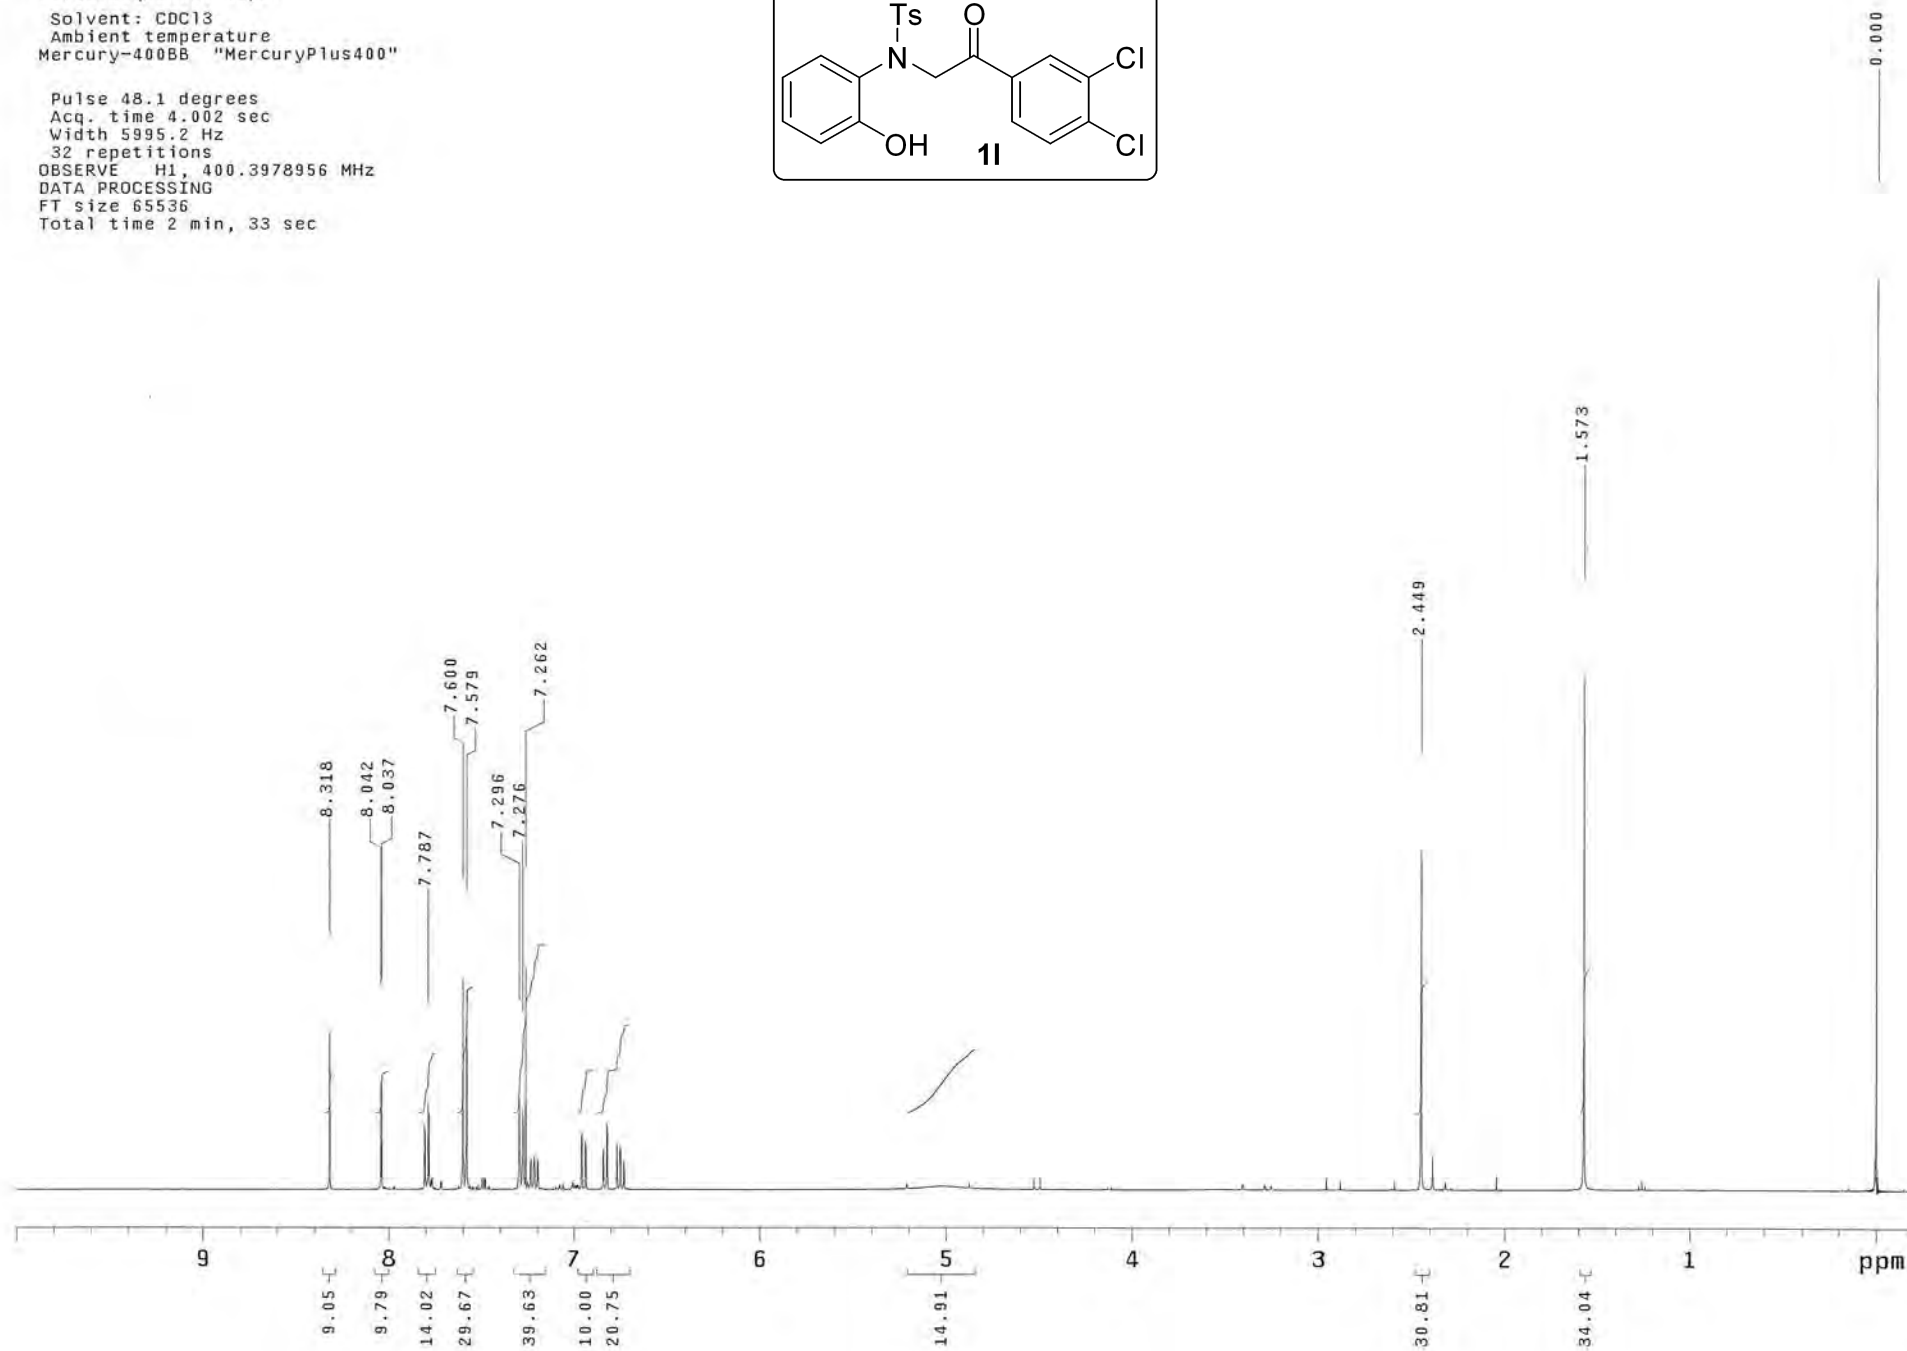

SIVA-RP3-58

Pulse Sequence: s2pul

Solvent: CDCl3

Ambient temperature

Mercury-400BB "MercuryPlus400"

Pulse 68.7 degrees

Acq. time 1.000 sec

Width 25000.0 Hz

2048 repetitions

OBSERVE C13, 100.6801315 MHz

DECOUPLE H1, 400.3999572 MHz

Power 38 dB

continuously on

WALTZ-16 modulated

DATA PROCESSING

Line broadening 1.0 Hz

FT size 65536

Total time 21 hr, 51 min, 34 sec

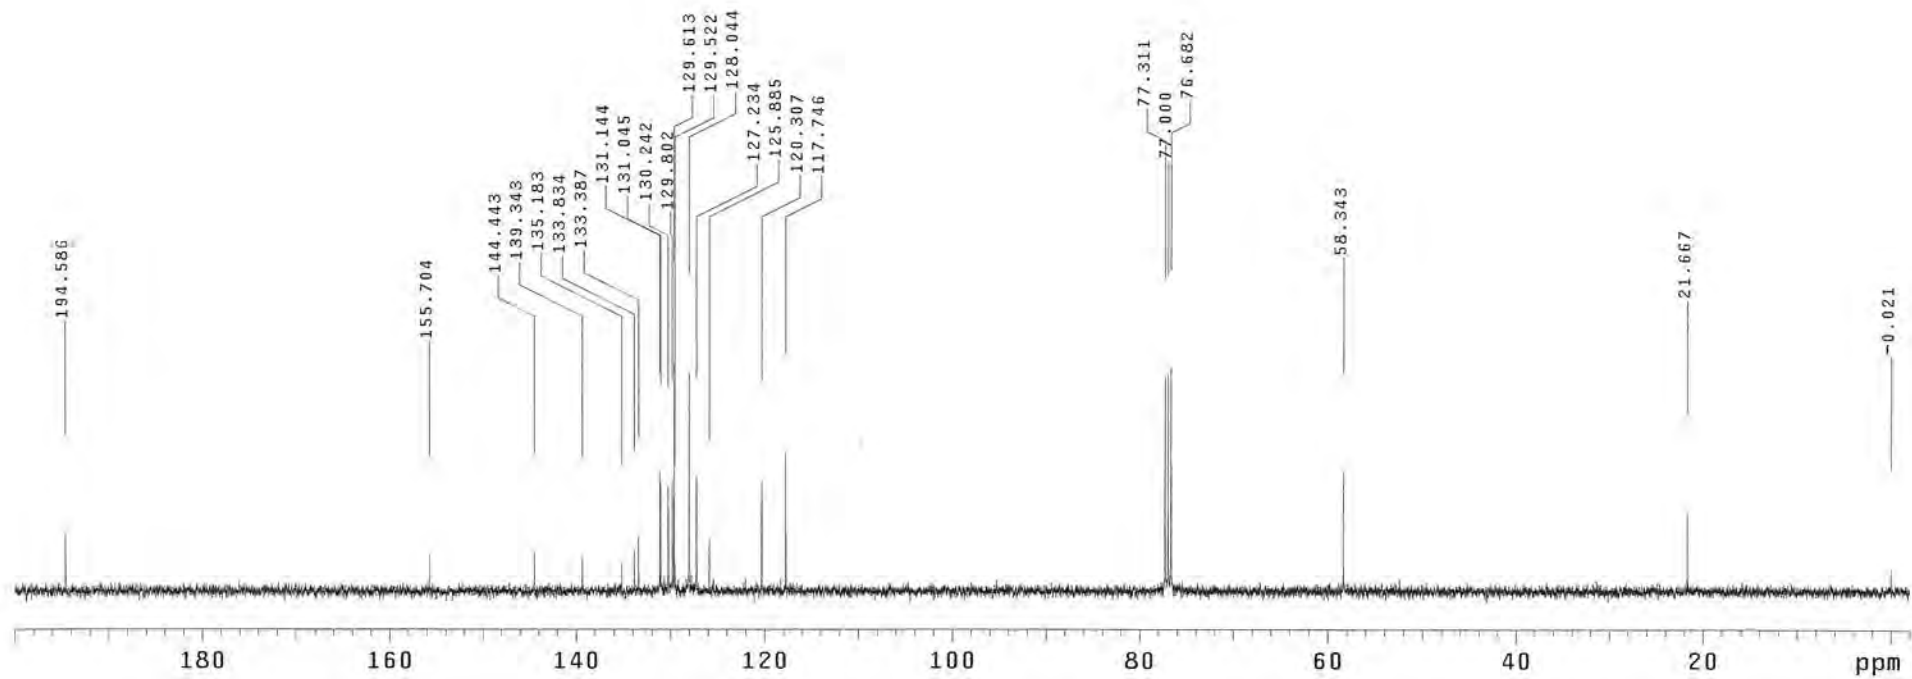

SIVA-RP3-34

Pulse Sequence: s2pu1

Solvent: CDCl3

Ambient temperature

Mercury-400BB "MercuryPlus400"

Pulse 48.1 degrees

Acq. time 4.002 sec

Width 5995.2 Hz

32 repetitions

OBSERVE H1, 400.3978973 MHz

DATA PROCESSING

FT size 65536

Total time 2 min, 33 sec

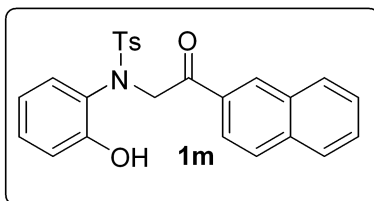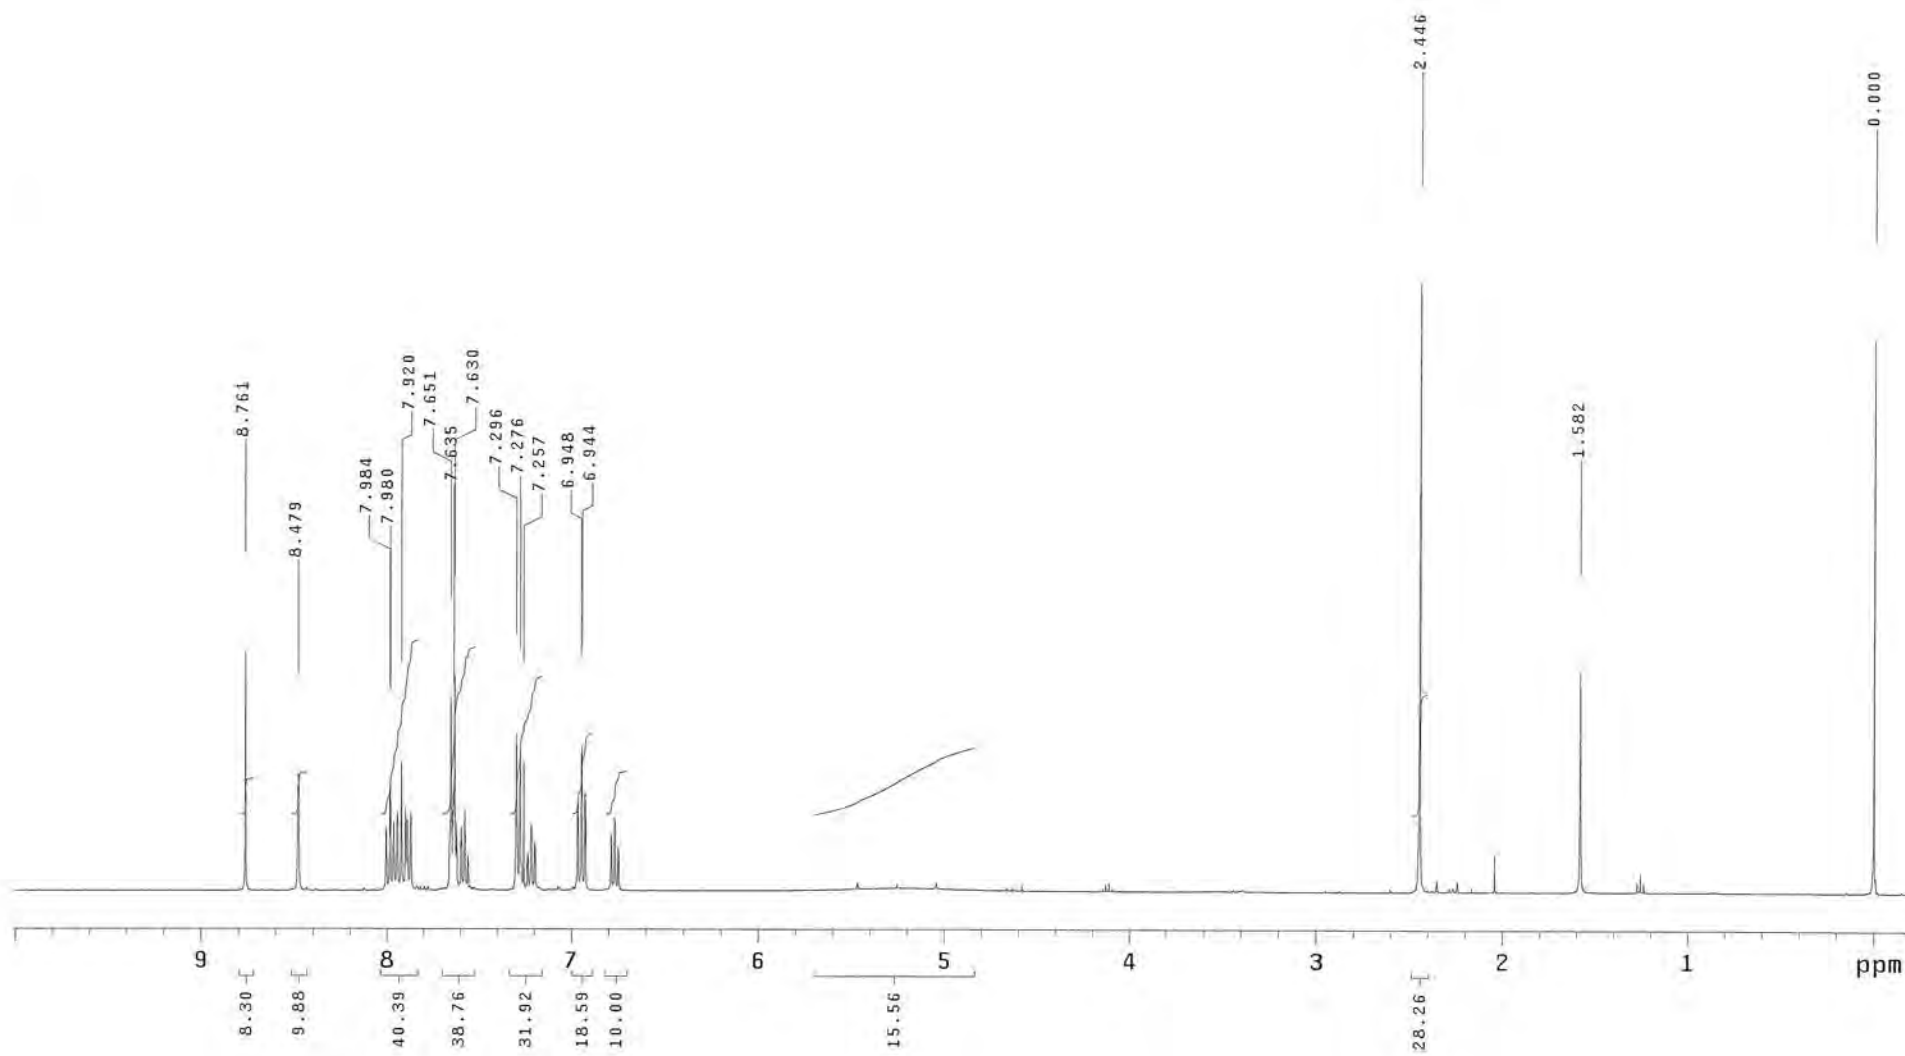



SIVA-RP3-34

Pulse Sequence: s2pu1

Solvent: CDCl3

Ambient temperature

Mercury-400BB "MercuryPlus400"

Pulse 68.7 degrees

Acq. time 1.000 sec

Width 25000.0 Hz

2304 repetitions

OBSERVE C13, 100.6801330 MHz

DECOUPLE H1, 400.3999572 MHz

Power 38 dB

continuously on

WALTZ-16 modulated

DATA PROCESSING

Line broadening 1.0 Hz

FT size 65536

Total time 21 hr, 51 min, 34 sec

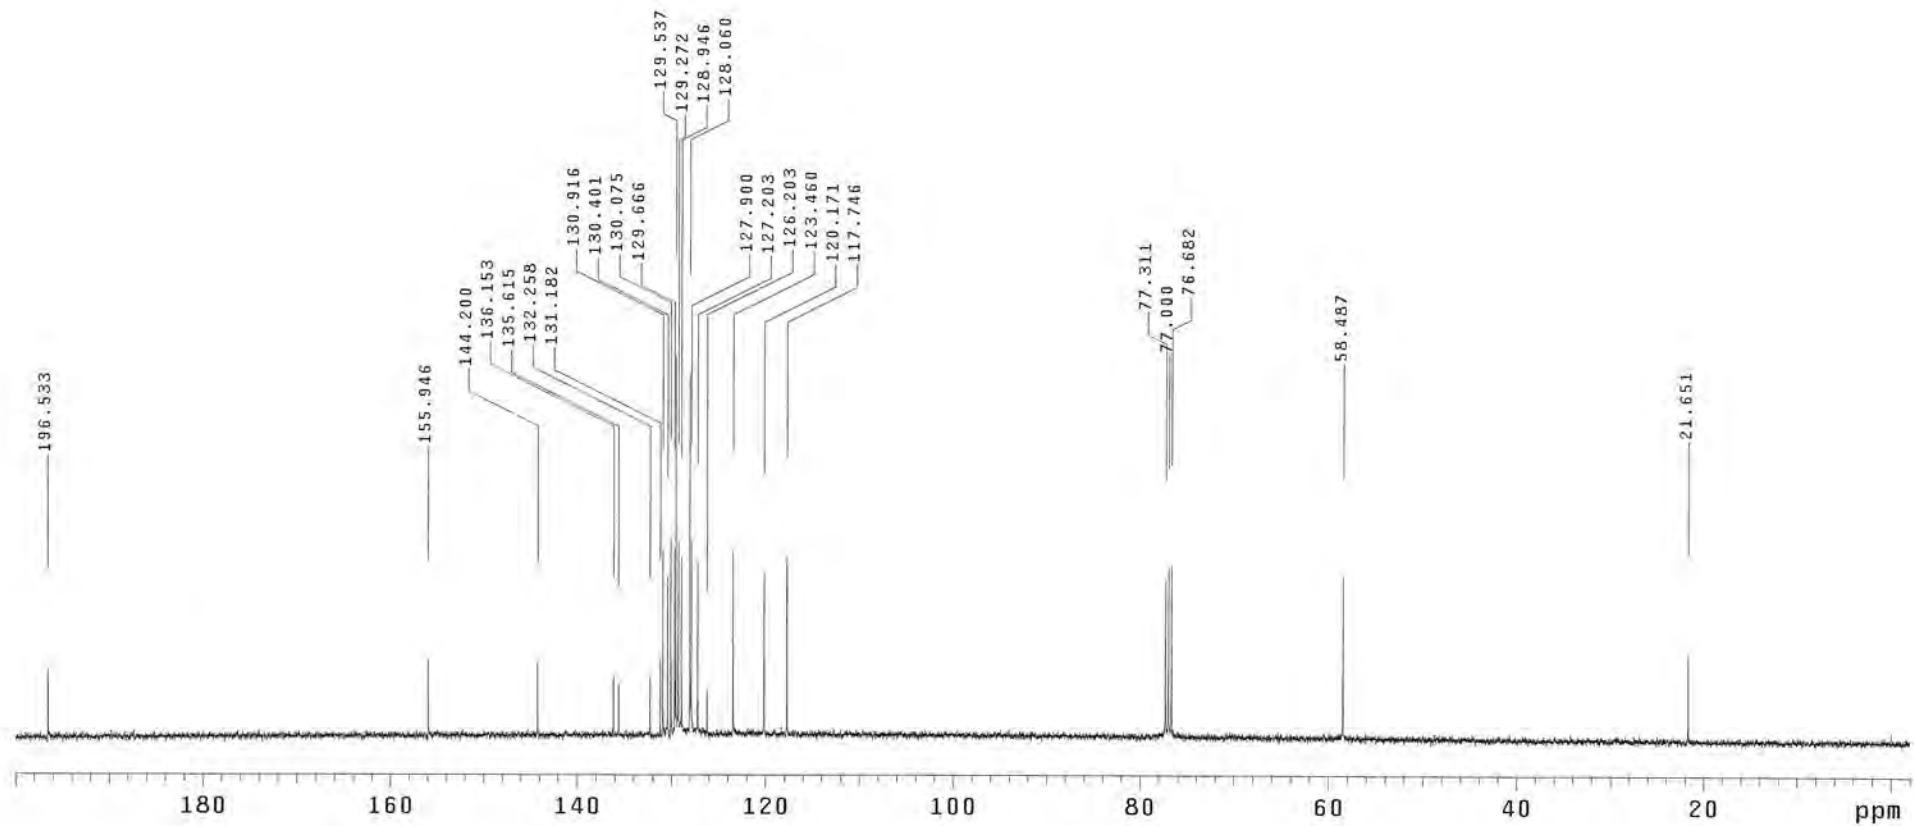

SIVA-RP3-31

Pulse Sequence: s2pu1

UNITYplus-400 "unity400"

Date: Oct 15 2013

Solvent: CDCl3

Ambient temperature

Total 64 repetitions

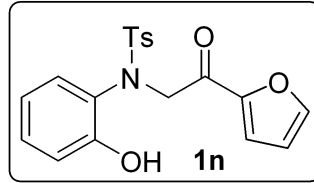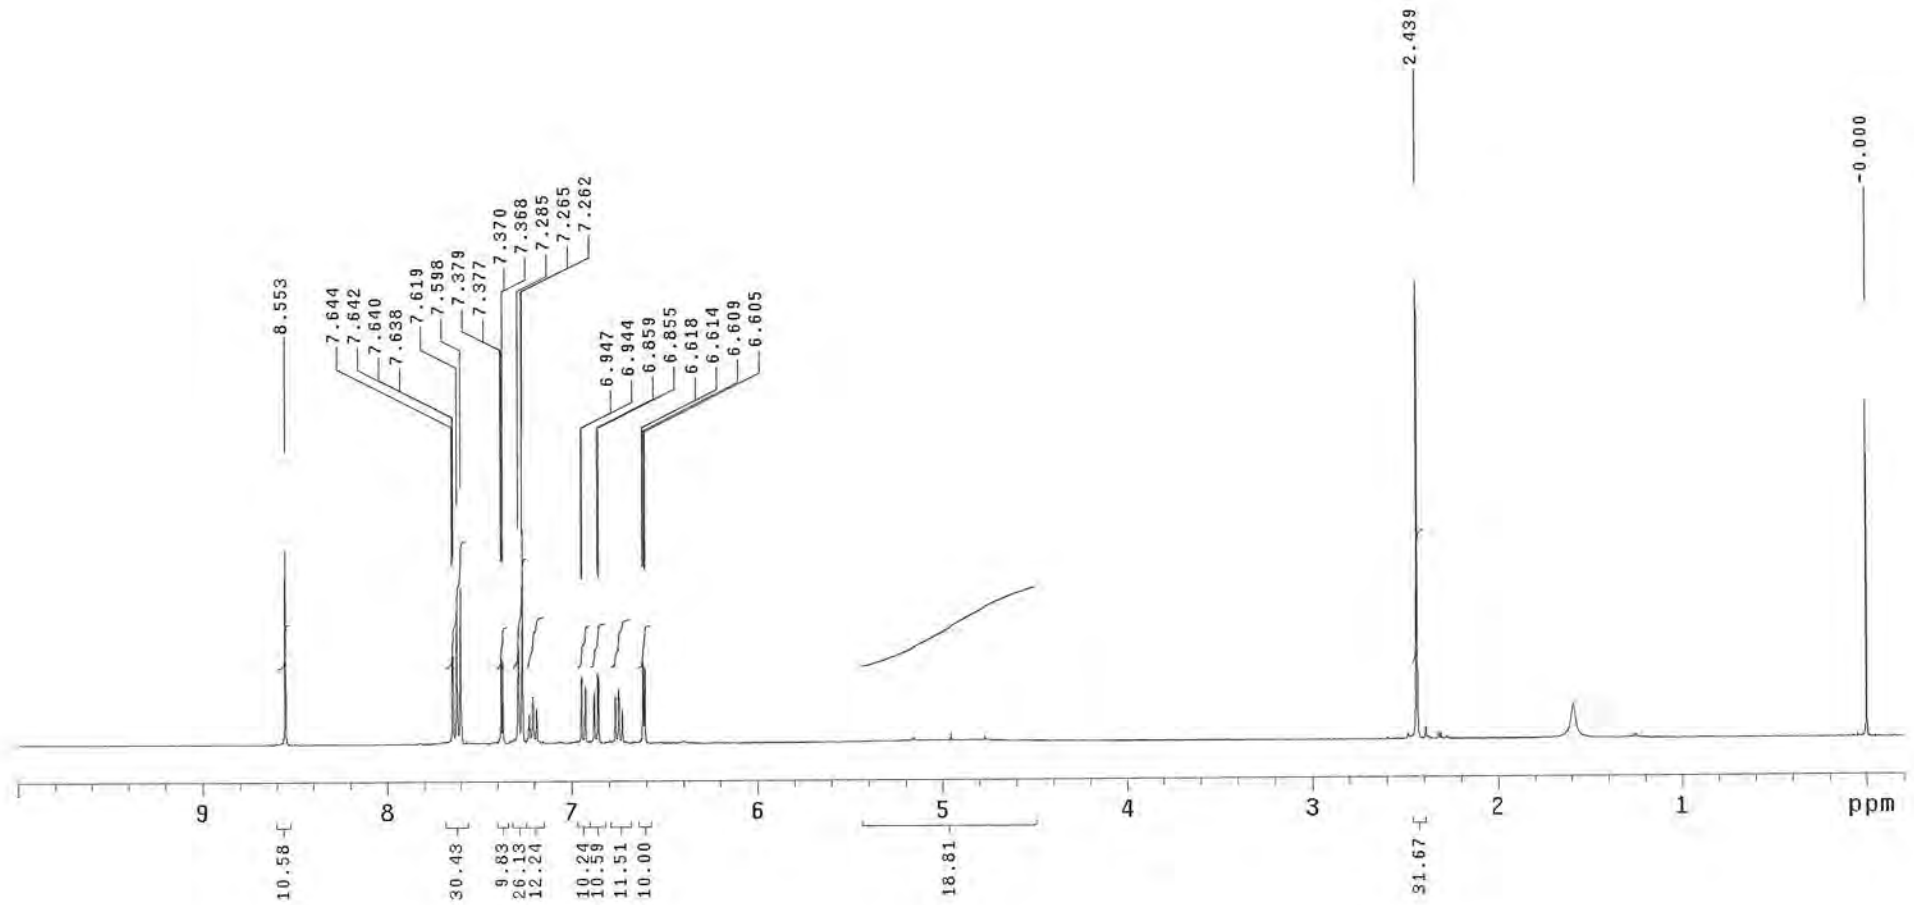

SIVA-RP3-31

Pulse Sequence: s2pu1

UNITYplus-400 "unity400"

Date: Oct 15 2013

Solvent: CDCl3

Ambient temperature

Total 6784 repetitions

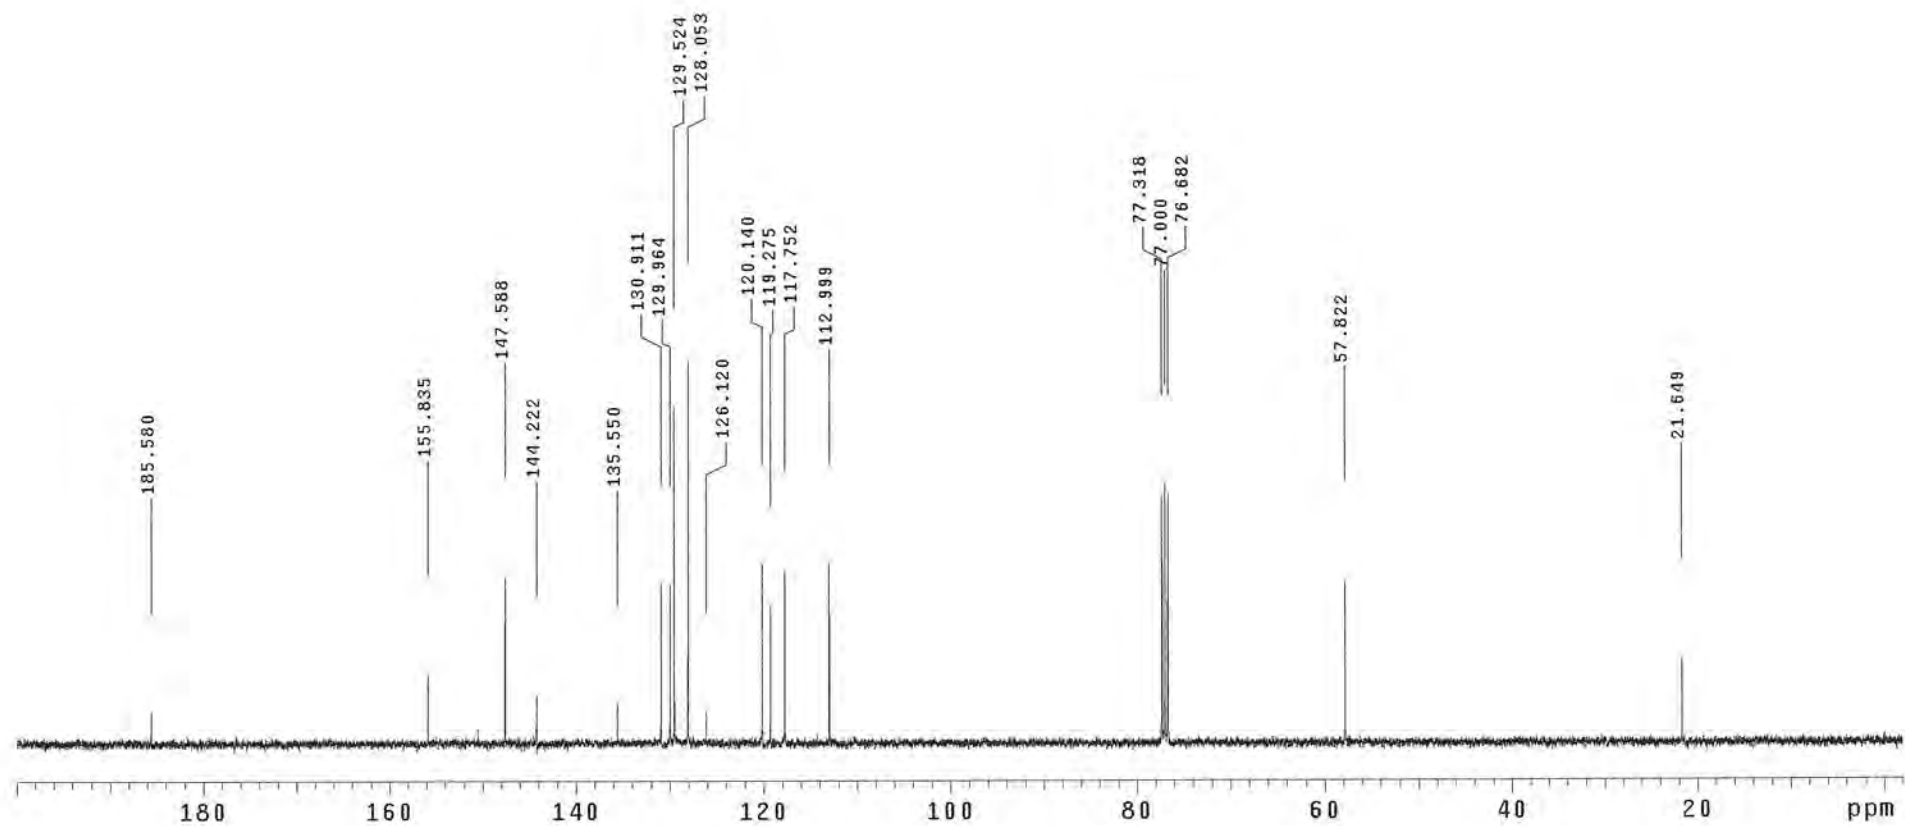

SIVA-RP3-45

Pulse Sequence: s2pu1

UNITYplus-400 "unity400"

Date: Mar 18 2014

Solvent: DMSO

Ambient temperature

Total 80 repetitions

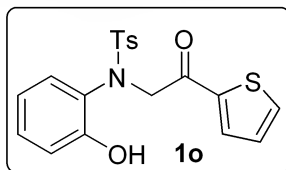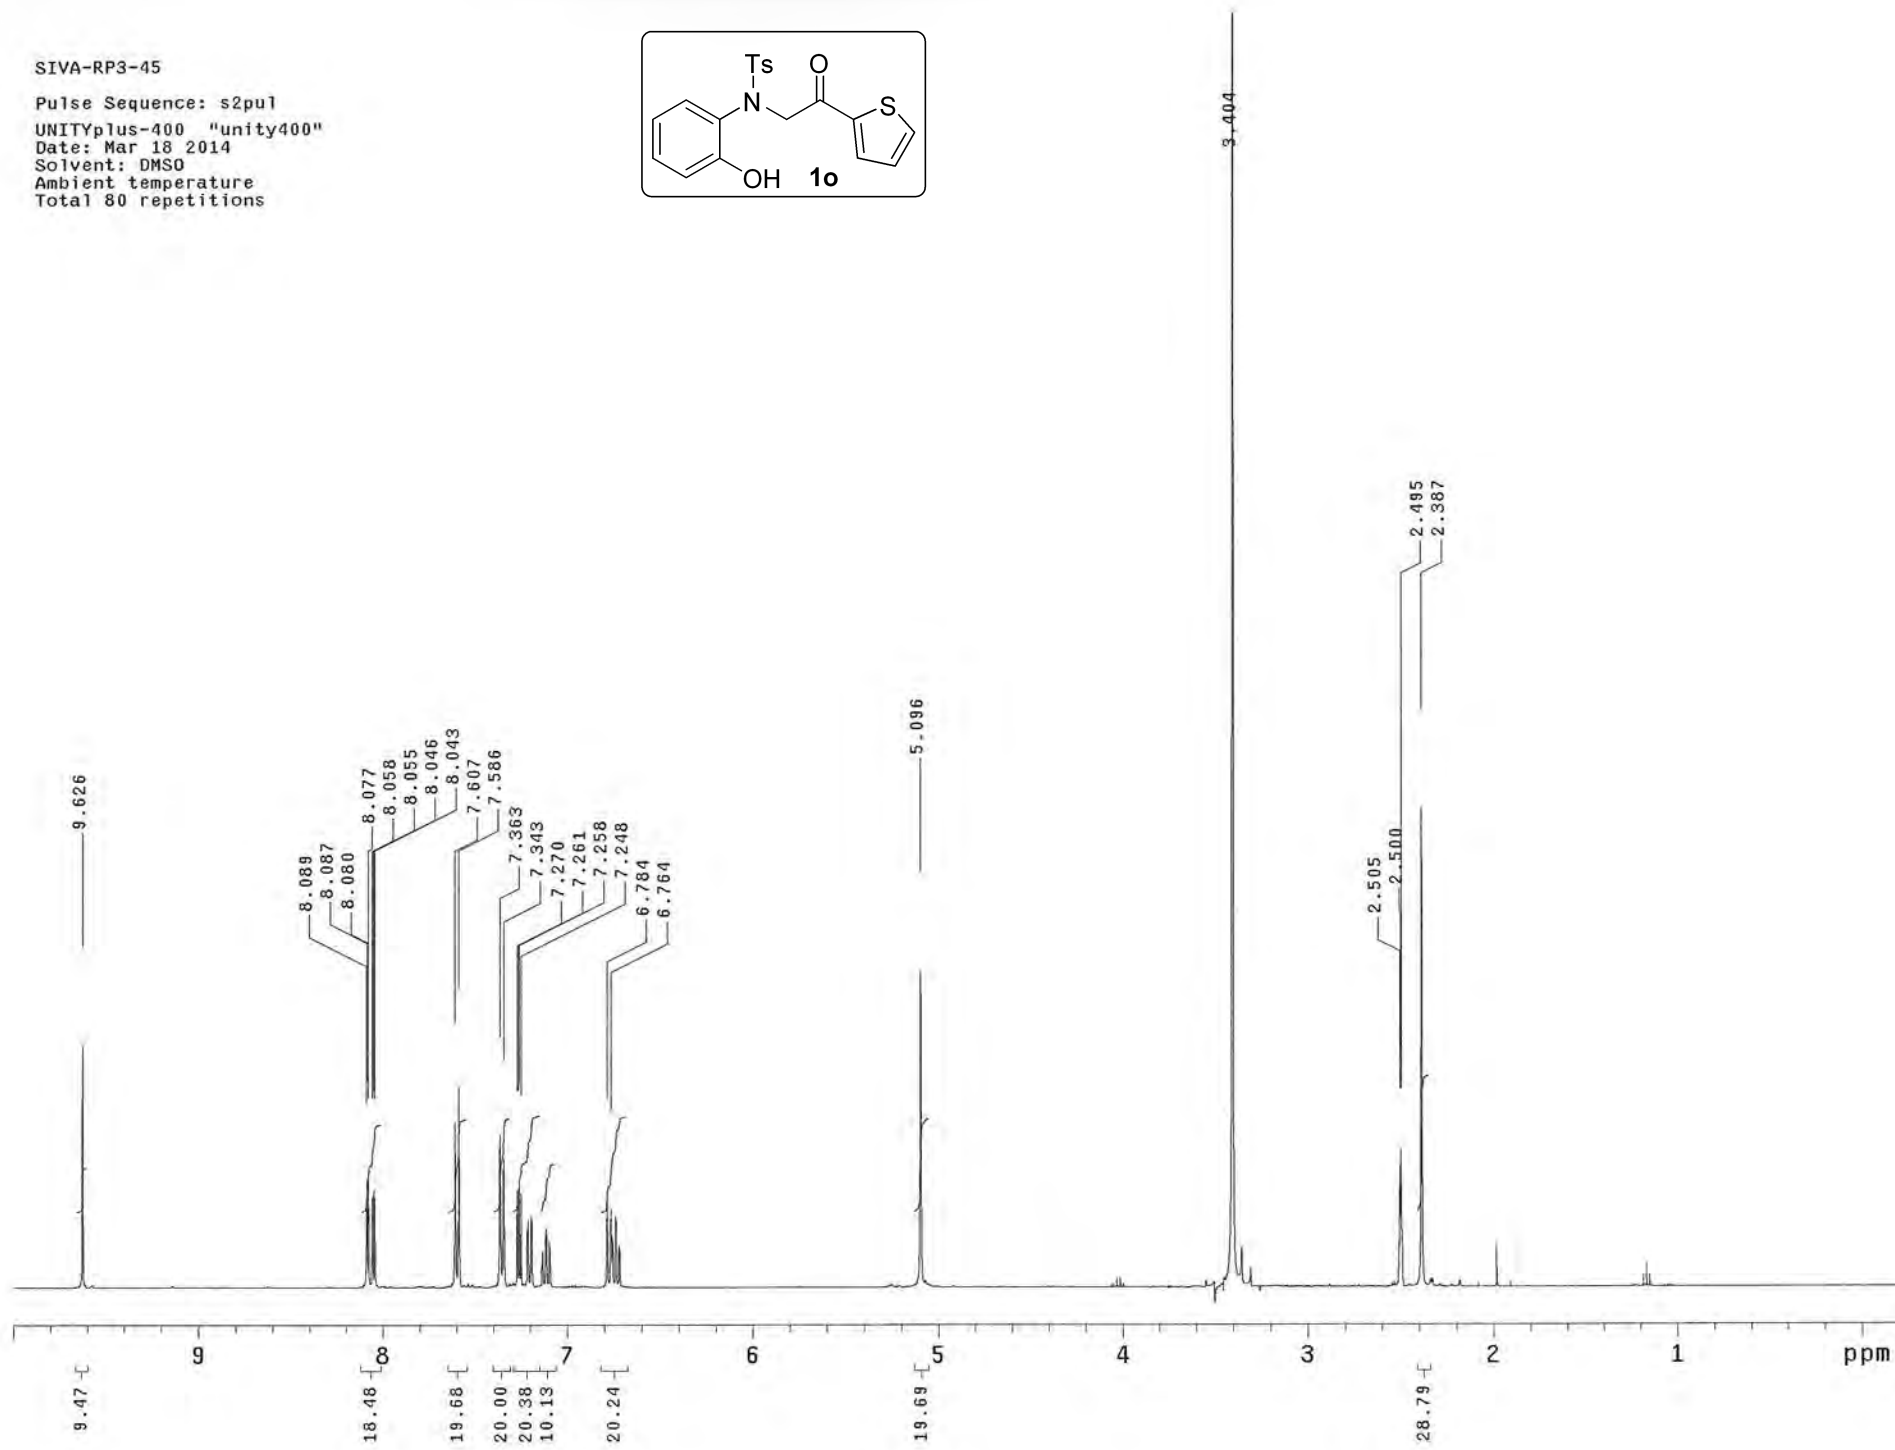

SIVA-RP3-45

Pulse Sequence: s2pu1

UNITYplus-400 "unity400"

Date: Mar 18 2014

Solvent: DMSO

Ambient temperature

Total 4816 repetitions

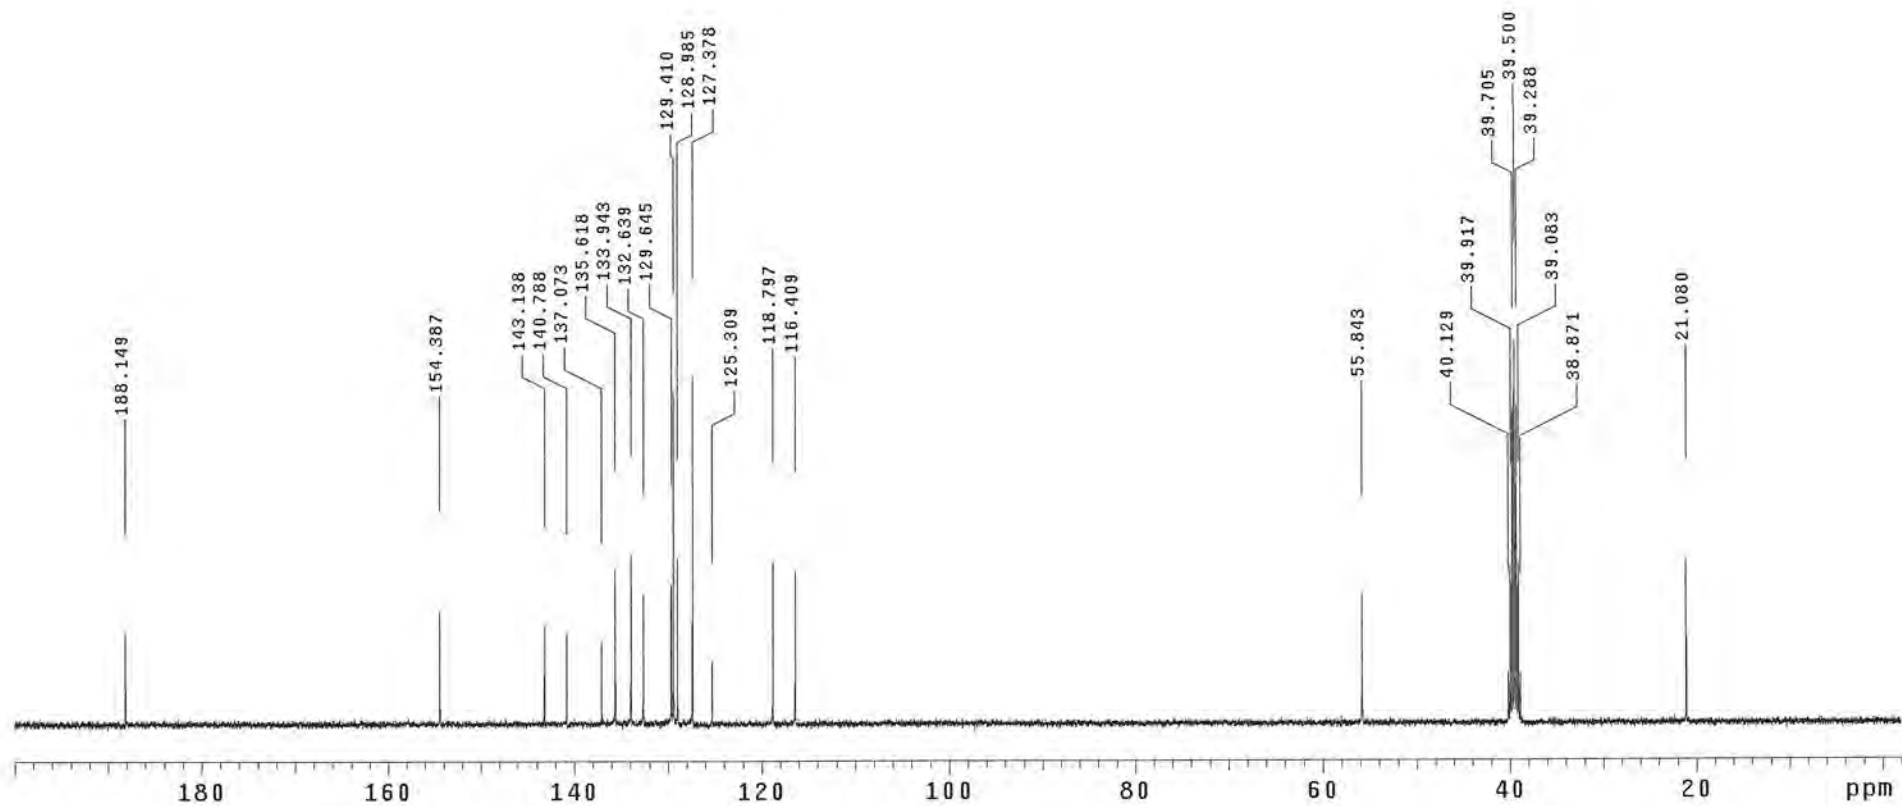

SIVA-RP3-073

Pulse Sequence: s2pu1

Solvent: CDCl3

Ambient temperature

Mercury-400BB "MercuryPlus400"

Pulse 48.1 degrees

Acq. time 4.002 sec

Width 5995.2 Hz

64 repetitions

OBSERVE H1, 400.3978956 MHz

DATA PROCESSING

FT size 65536

Total time 5 min, 7 sec

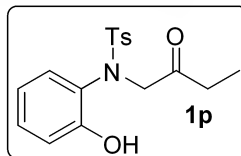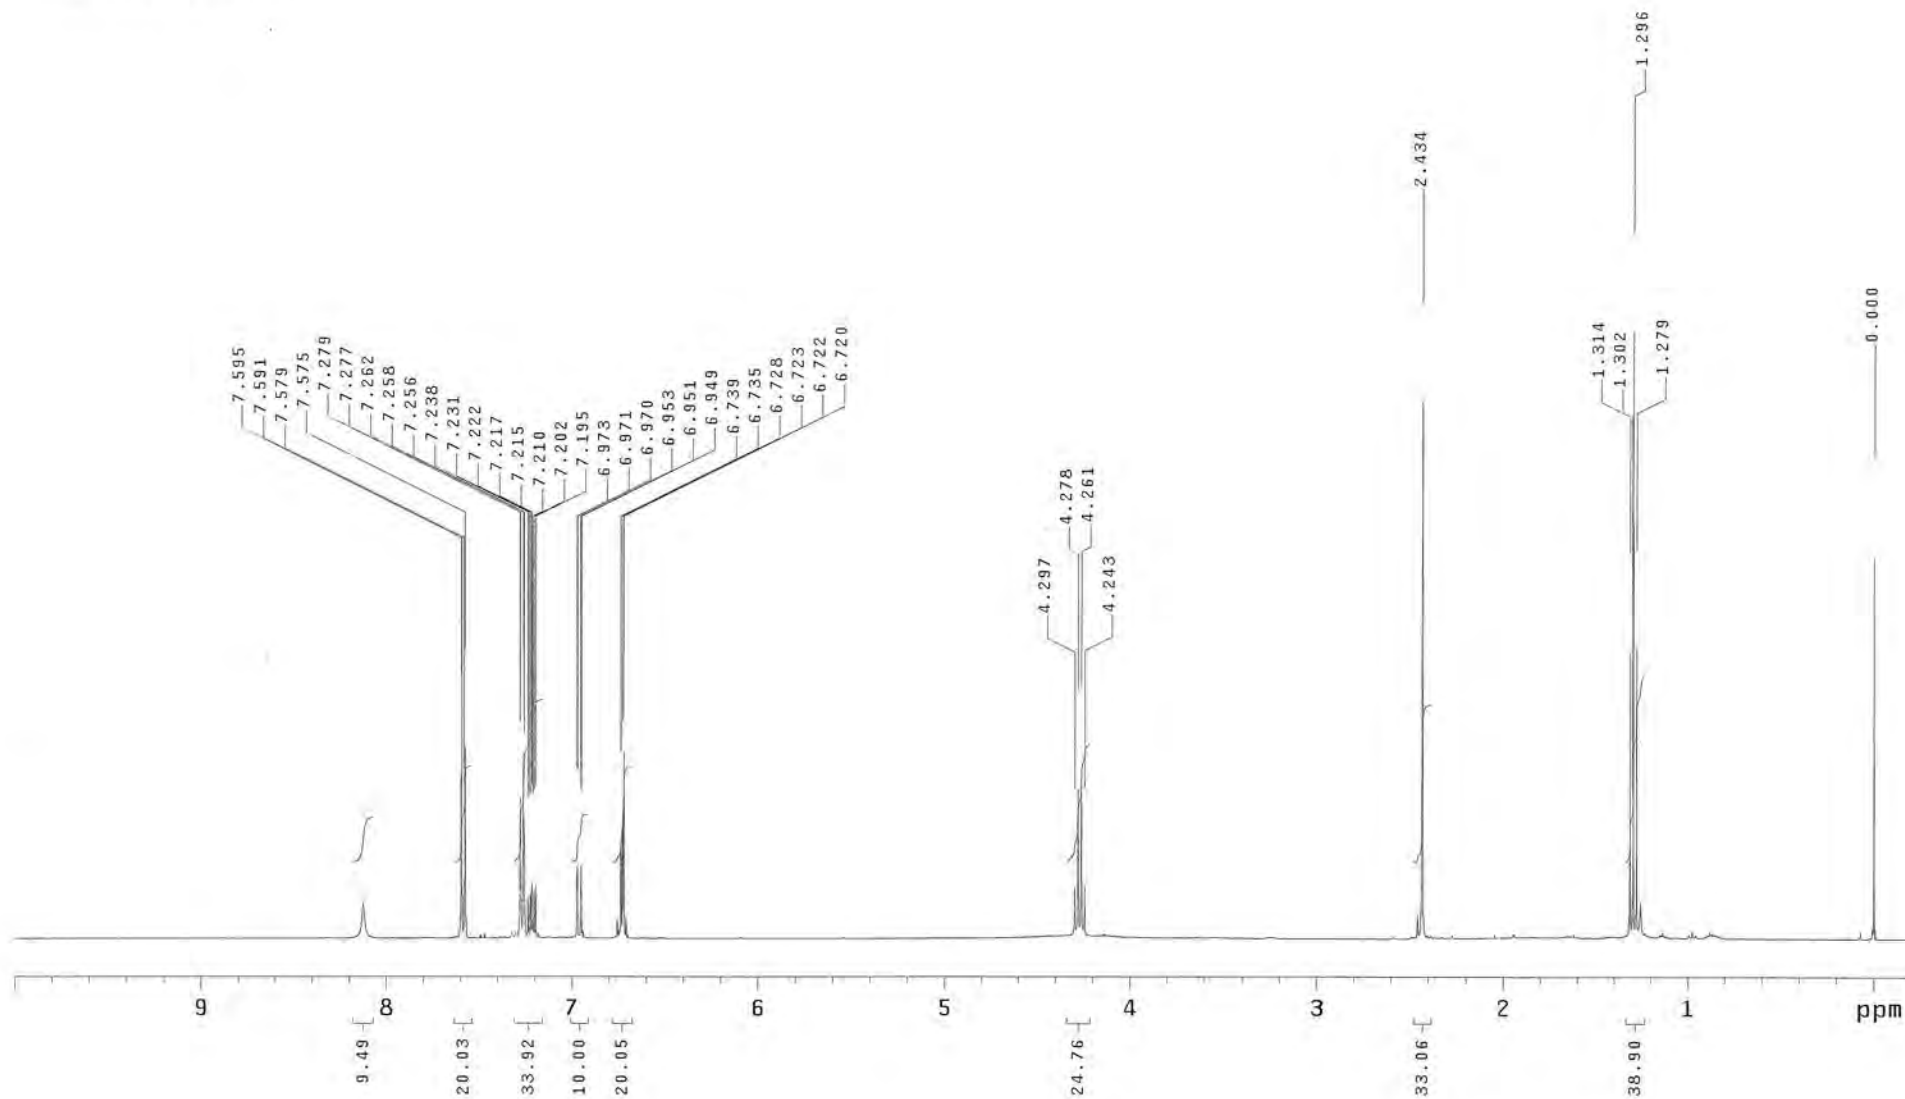

SIVA-RP3-073

Pulse Sequence: s2pu1

Solvent: CDC13

Ambient temperature

Mercury-400BB "MercuryPlus400"

Pulse 68.7 degrees

Acq. time 1.000 sec

Width 25000.0 Hz

2432 repetitions

OBSERVE C13, 100.6801323 MHz

DECOUPLE H1, 400.3999572 MHz

Power 38 dB

continuously on

WALTZ-16 modulated

DATA PROCESSING

Line broadening 1.0 Hz

FT size 65536

Total time 21 hr, 51 min, 34 sec

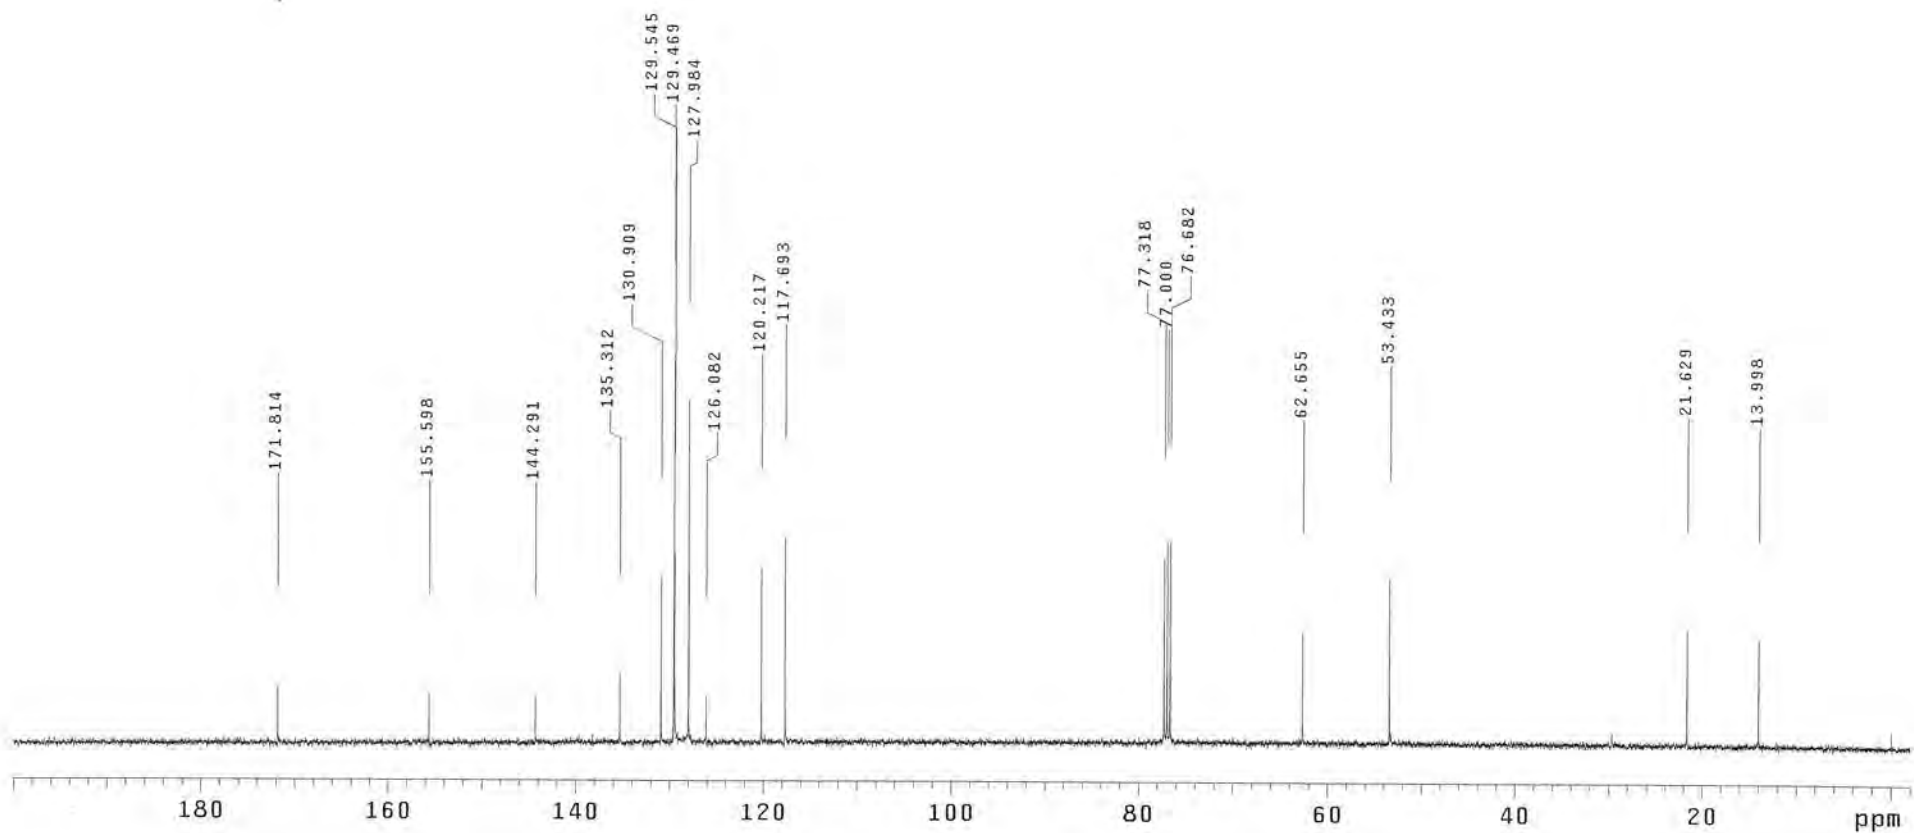

SIVA-RP3-125

Pulse Sequence: s2pu1

Solvent: CDCl3

Ambient temperature

Mercury-400BB "MercuryPlus400"

Pulse 48.1 degrees

Acq. time 4.002 sec

Width 5995.2 Hz

64 repetitions

OBSERVE H1, 400.3978960 MHz

DATA PROCESSING

FT size 65536

Total time 5 min, 7 sec

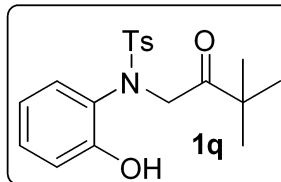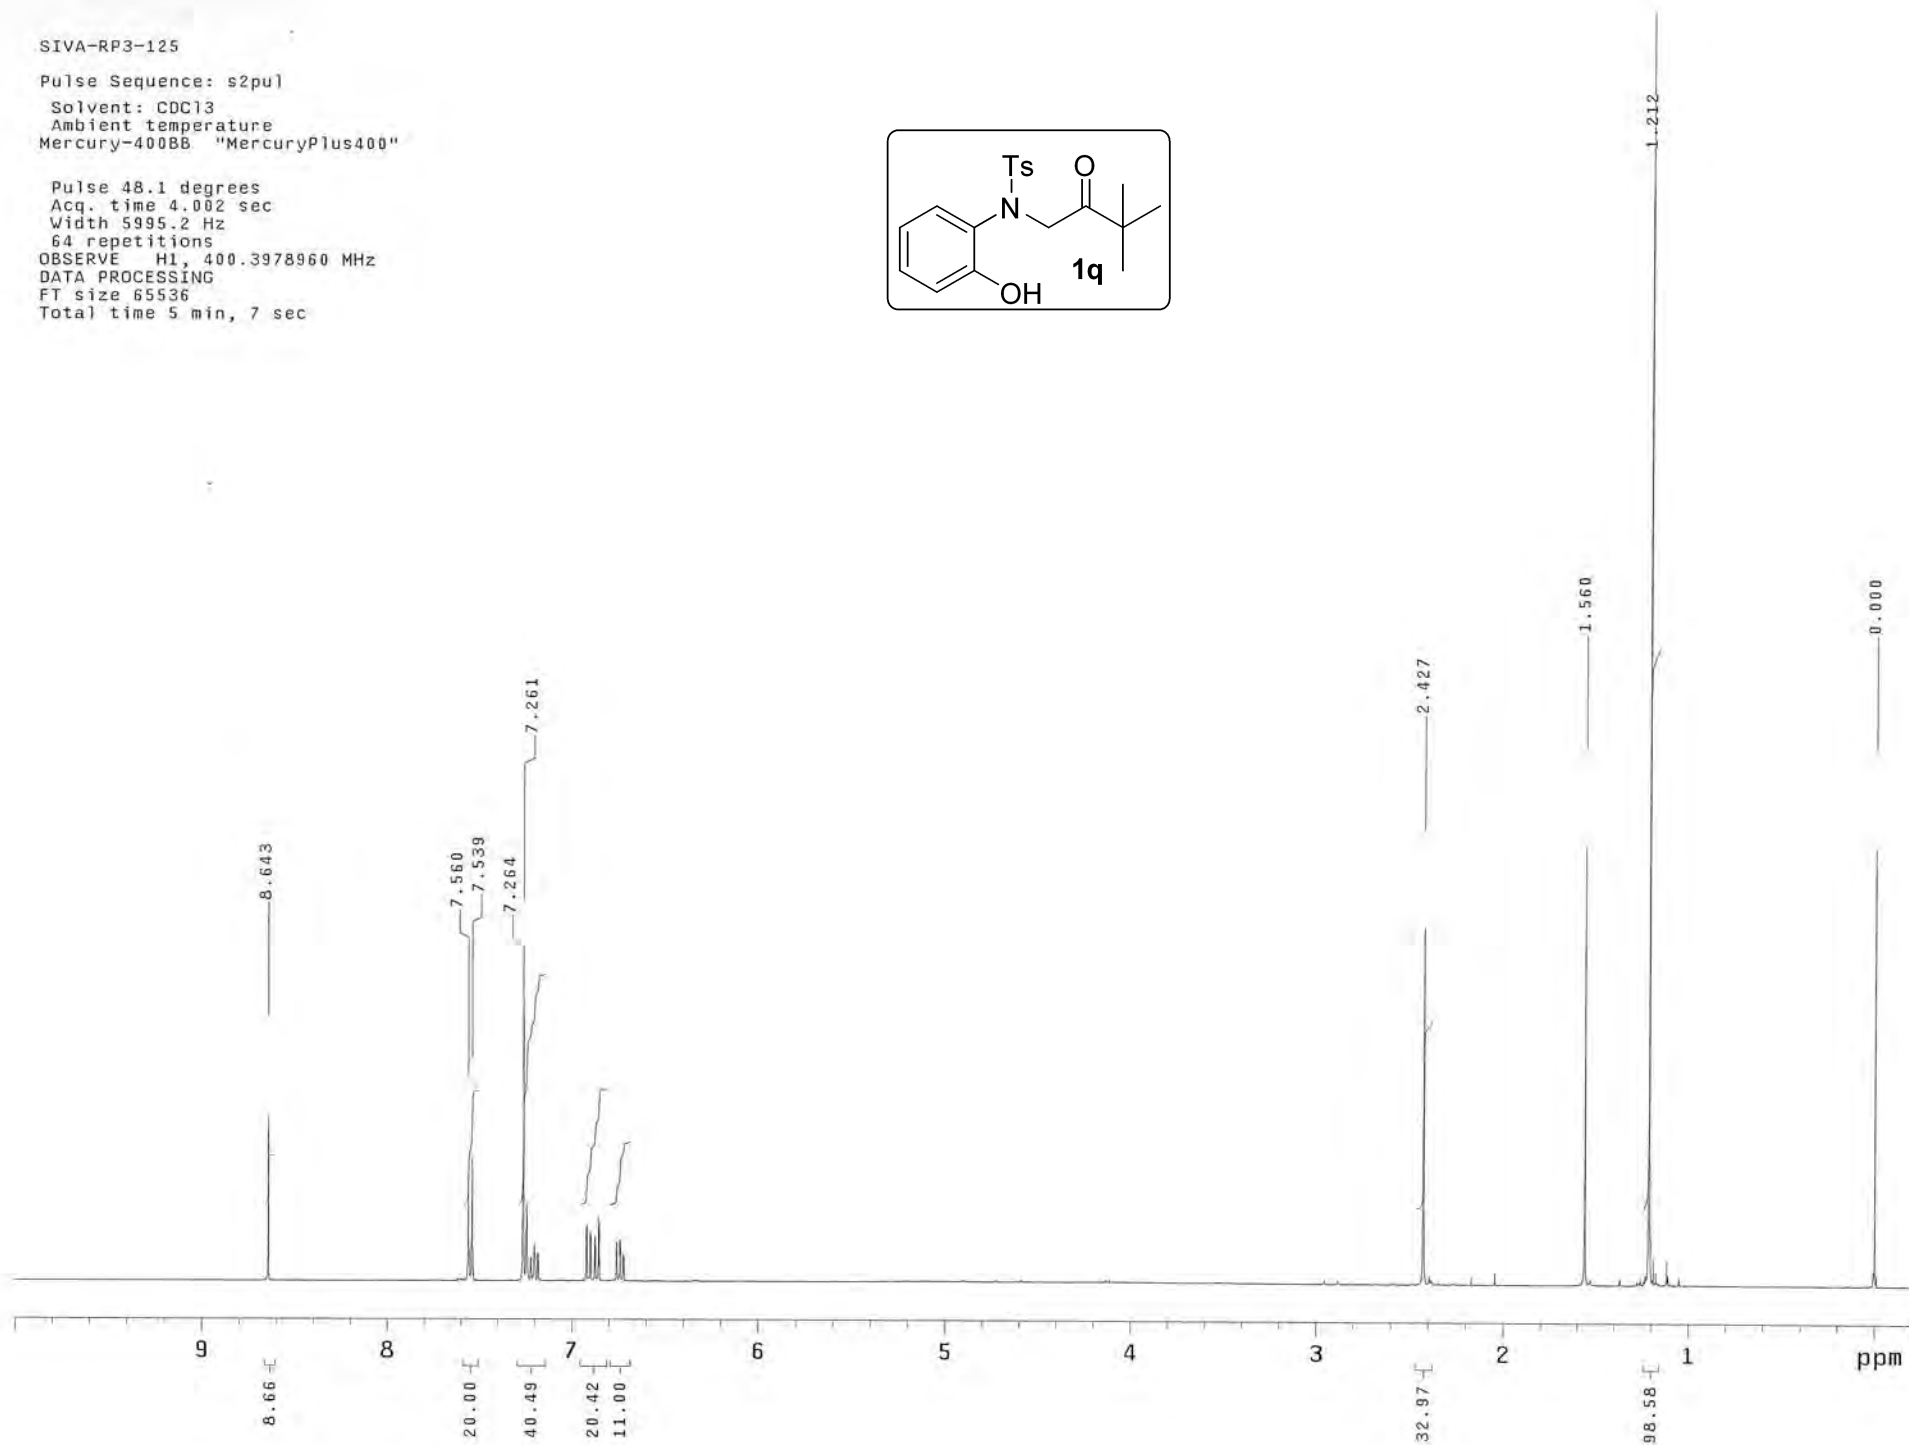



SIVA-RP3-125

Pulse Sequence: s2pu1

Solvent: CDC13

Ambient temperature

Mercury-400BB "MercuryPlus400"

Relax. delay 0.500 sec

Pulse 68.7 degrees

Acq. time 1.000 sec

Width 25000.0 Hz

16000 repetitions

OBSERVE C13, 100.6801308 MHz

DECOUPLE H1, 400.3999572 MHz

Power 38 dB

continuously on

WALTZ-16 modulated

DATA PROCESSING

Line broadening 1.0 Hz

FT size 65536

Total time 7 hr, 41 min, 13 sec

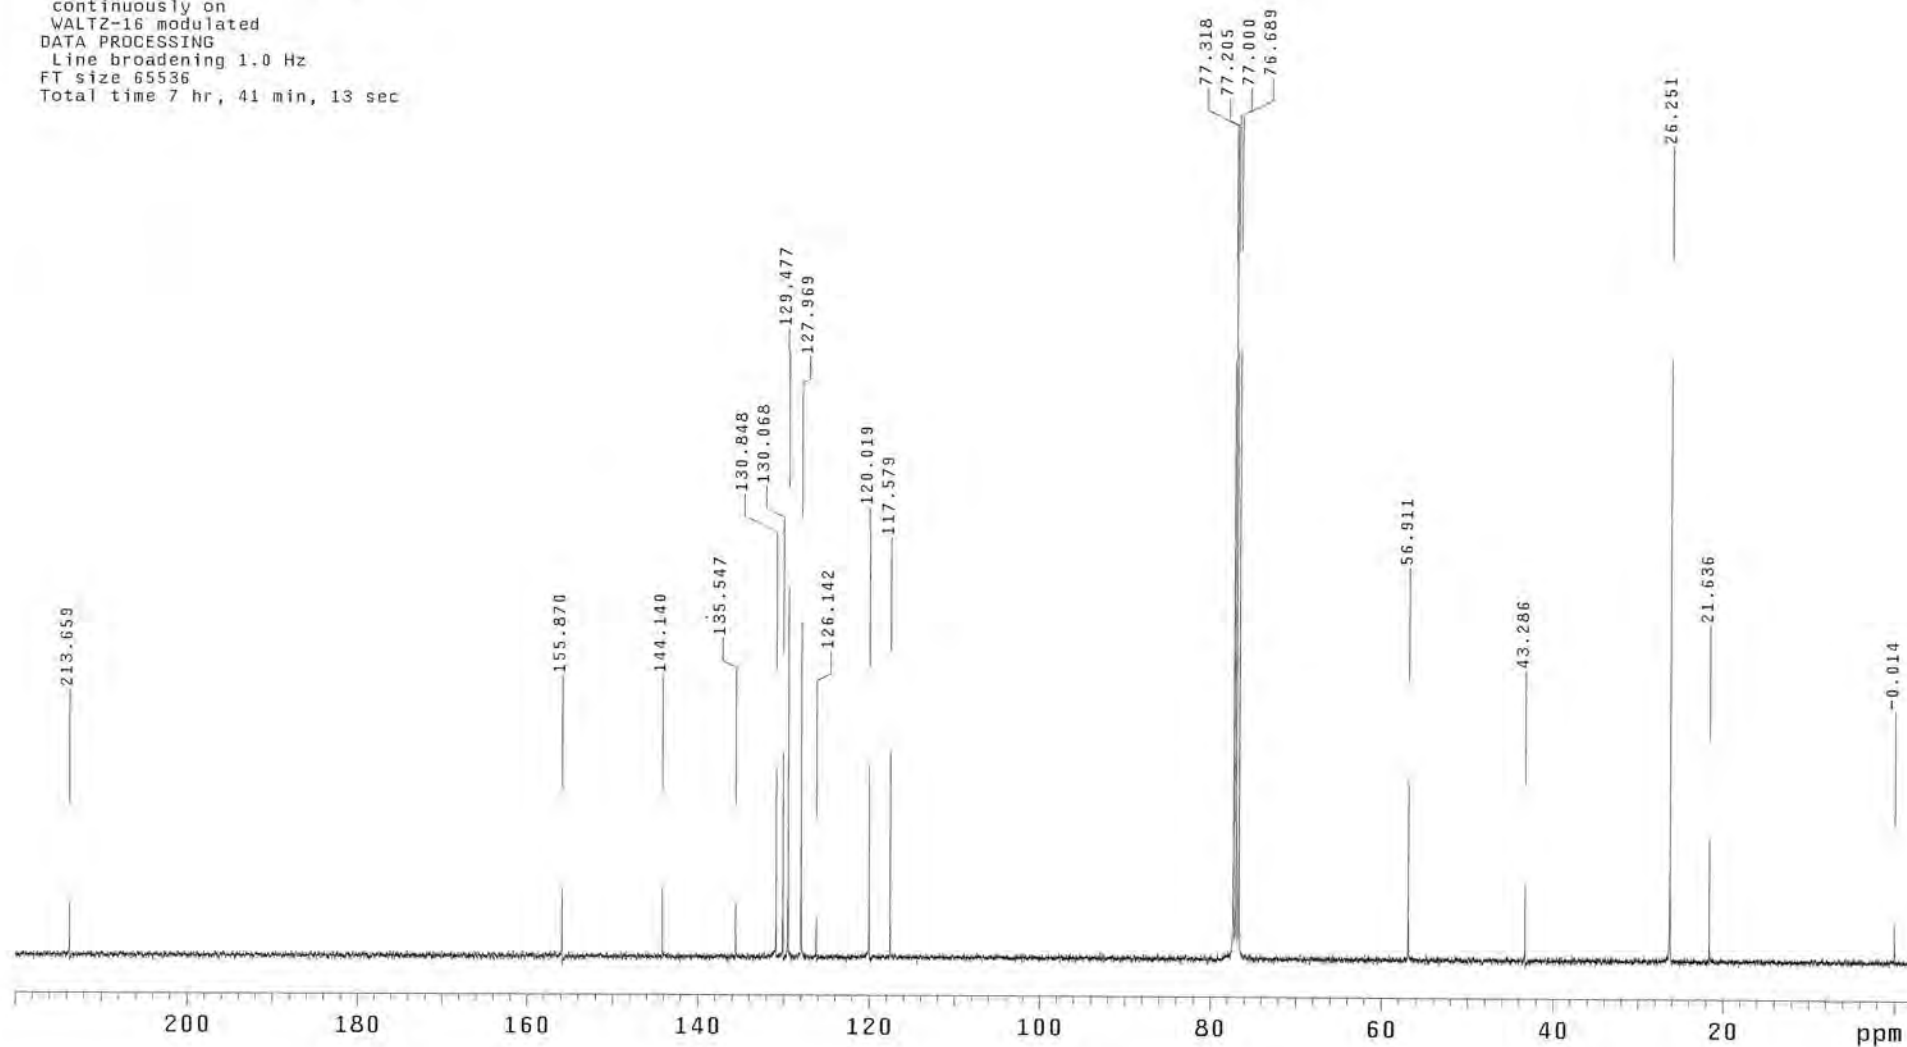

SIVA-RP4-157

Pulse Sequence: s2pul

Mercury-400BB "MercuryPlus400"

Date: Mar 3 2014

Solvent: CDCl3

Ambient temperature

Total 48 repetitions

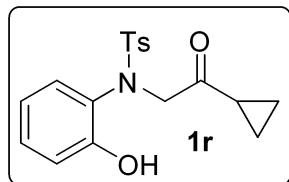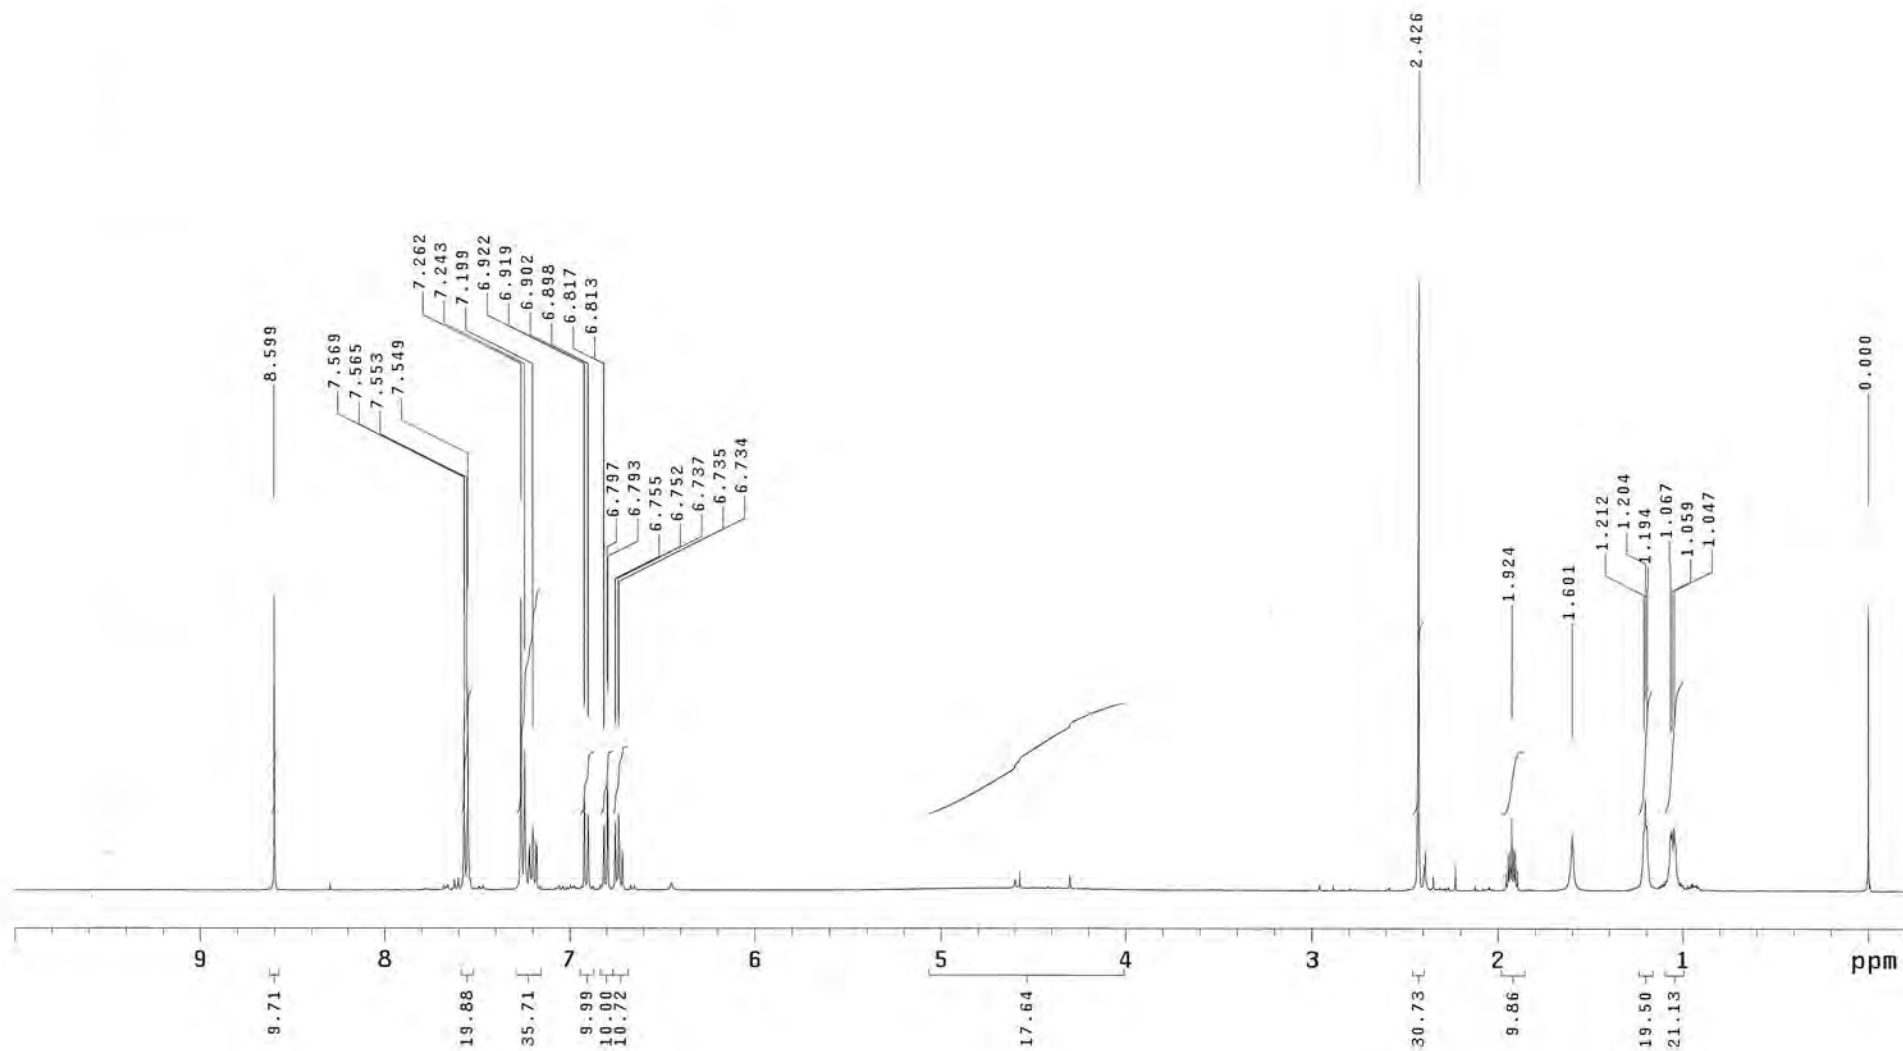

SIVA-RP4-157

Pulse Sequence: s2pu1

Mercury-400BB "MercuryPlus400"

Date: Mar 3 2014

Solvent: CDCl3

Ambient temperature

Total 5504 repetitions

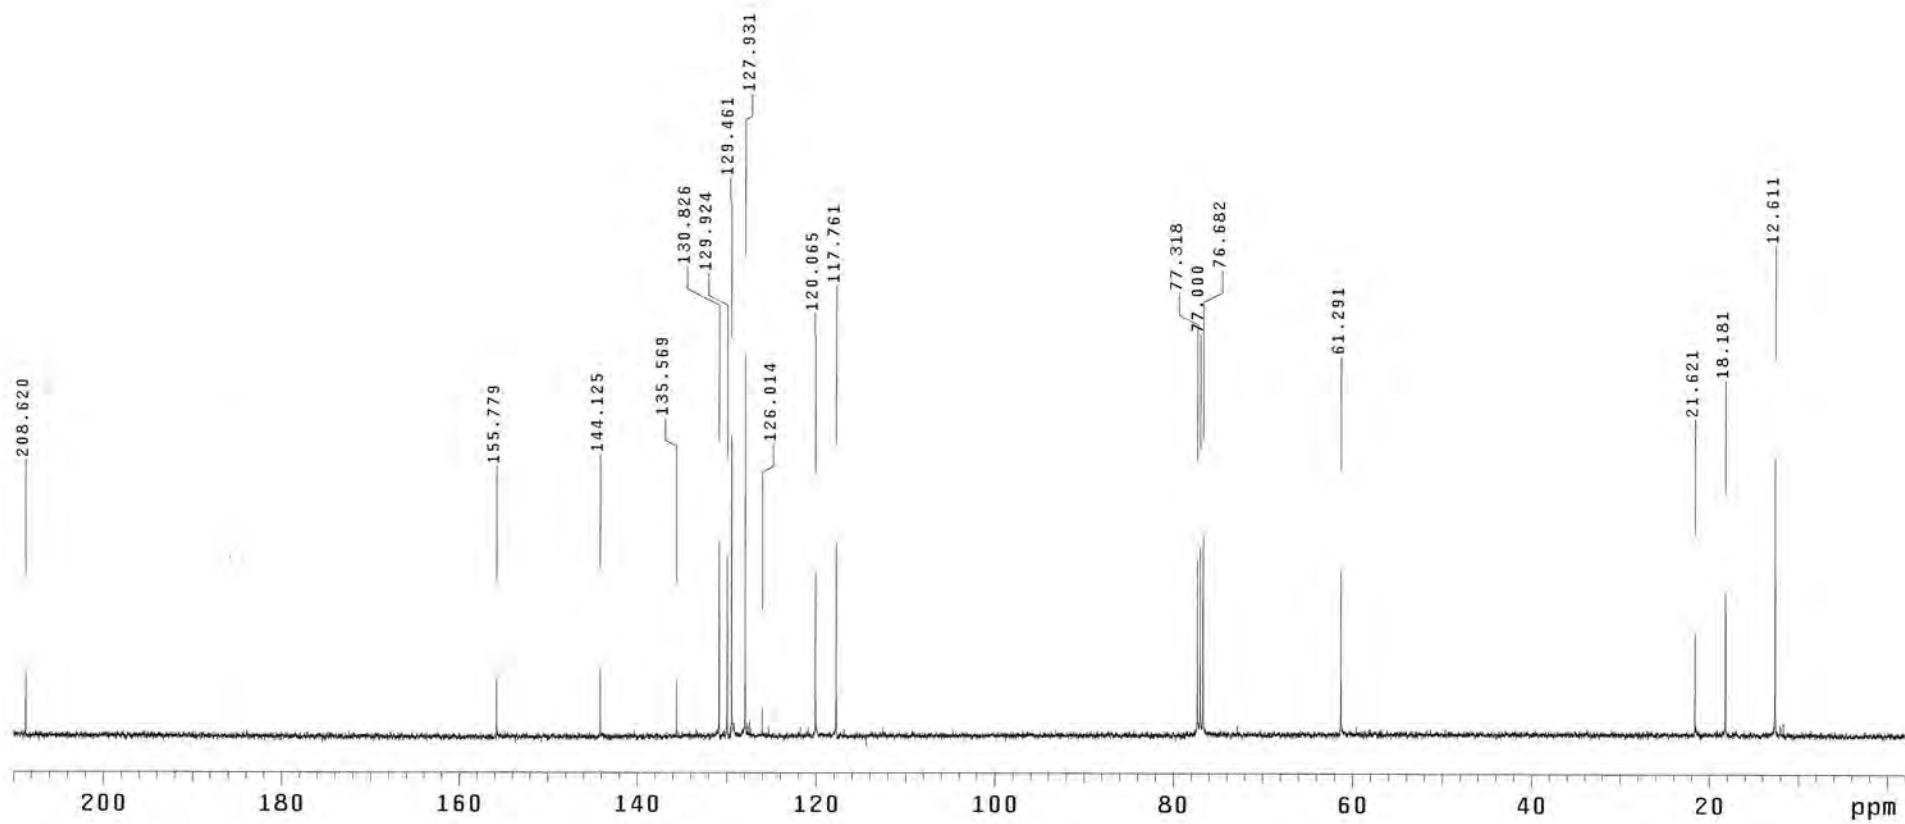

SIVA-RP3-56

Pulse Sequence: s2pul

Solvent: CDCl3

Ambient temperature

Mercury-400BB "MercuryPlus400"

Pulse 48.1 degrees

Acq. time 4.002 sec

Width 5995.2 Hz

36 repetitions

OBSERVE H1, 400.3978960 MHz

DATA PROCESSING

FT size 65536

Total time 5 min, 7 sec

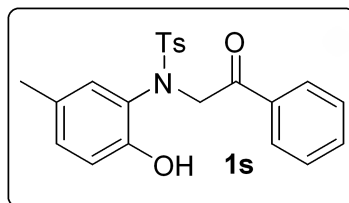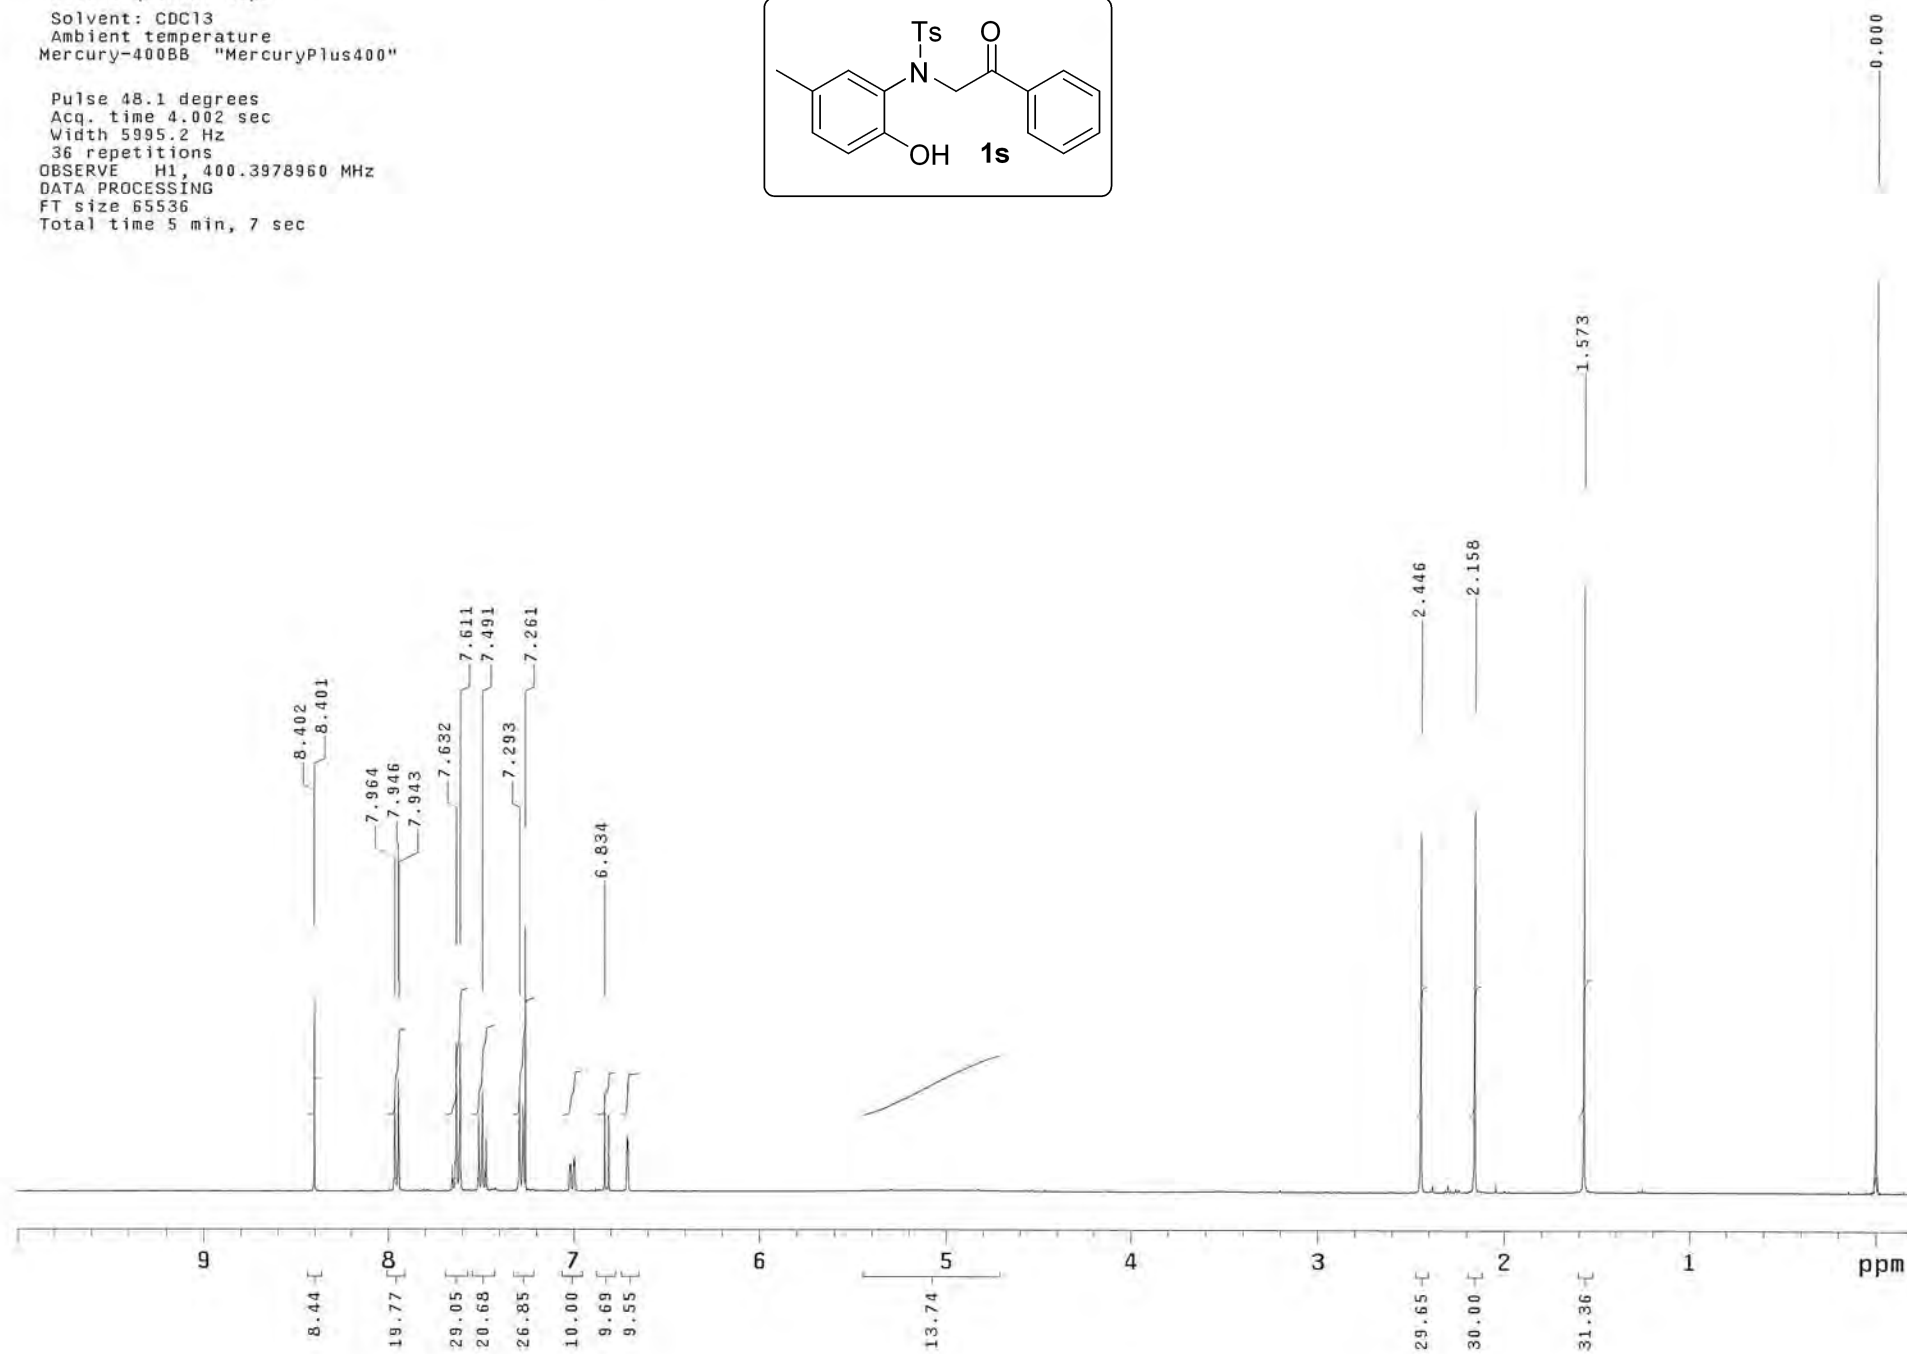

SIVA-RP3-56

Pulse Sequence: s2pu1

Solvent: CDCl3

Ambient temperature

Mercury-400BB "MercuryPlus400"

Pulse 68.7 degrees

Acq. time 1.000 sec

Width 25000.0 Hz

5024 repetitions

OBSERVE C13, 100.6801315 MHz

DECOUPLE H1, 400.3999572 MHz

Power 38 dB

continuously on

WALTZ-16 modulated

DATA PROCESSING

Line broadening 1.0 Hz

FT size 65536

Total time 21 hr, 51 min, 34 sec

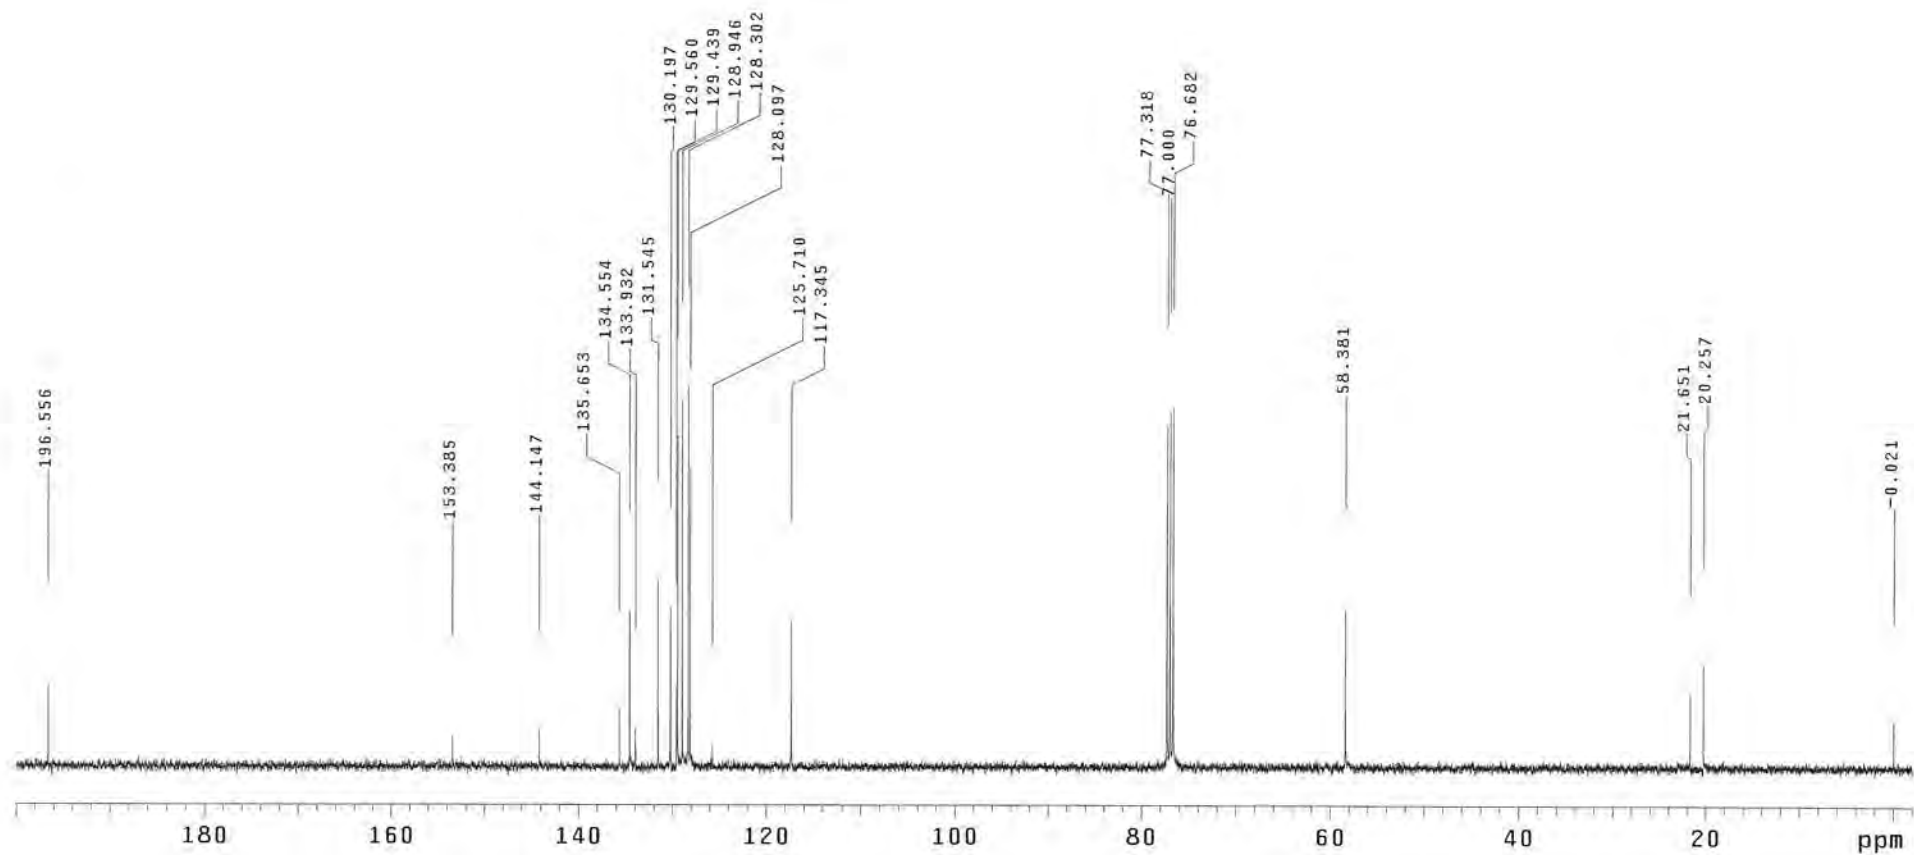

SIVA-RP3-83

Pulse Sequence: s2pu1

UNITYplus-400 "unity400"

Date: Oct 16 2013

Solvent: CDCl3

Ambient temperature

Total 64 repetitions

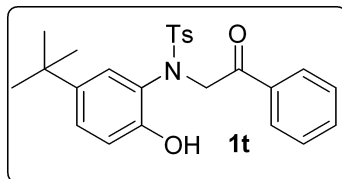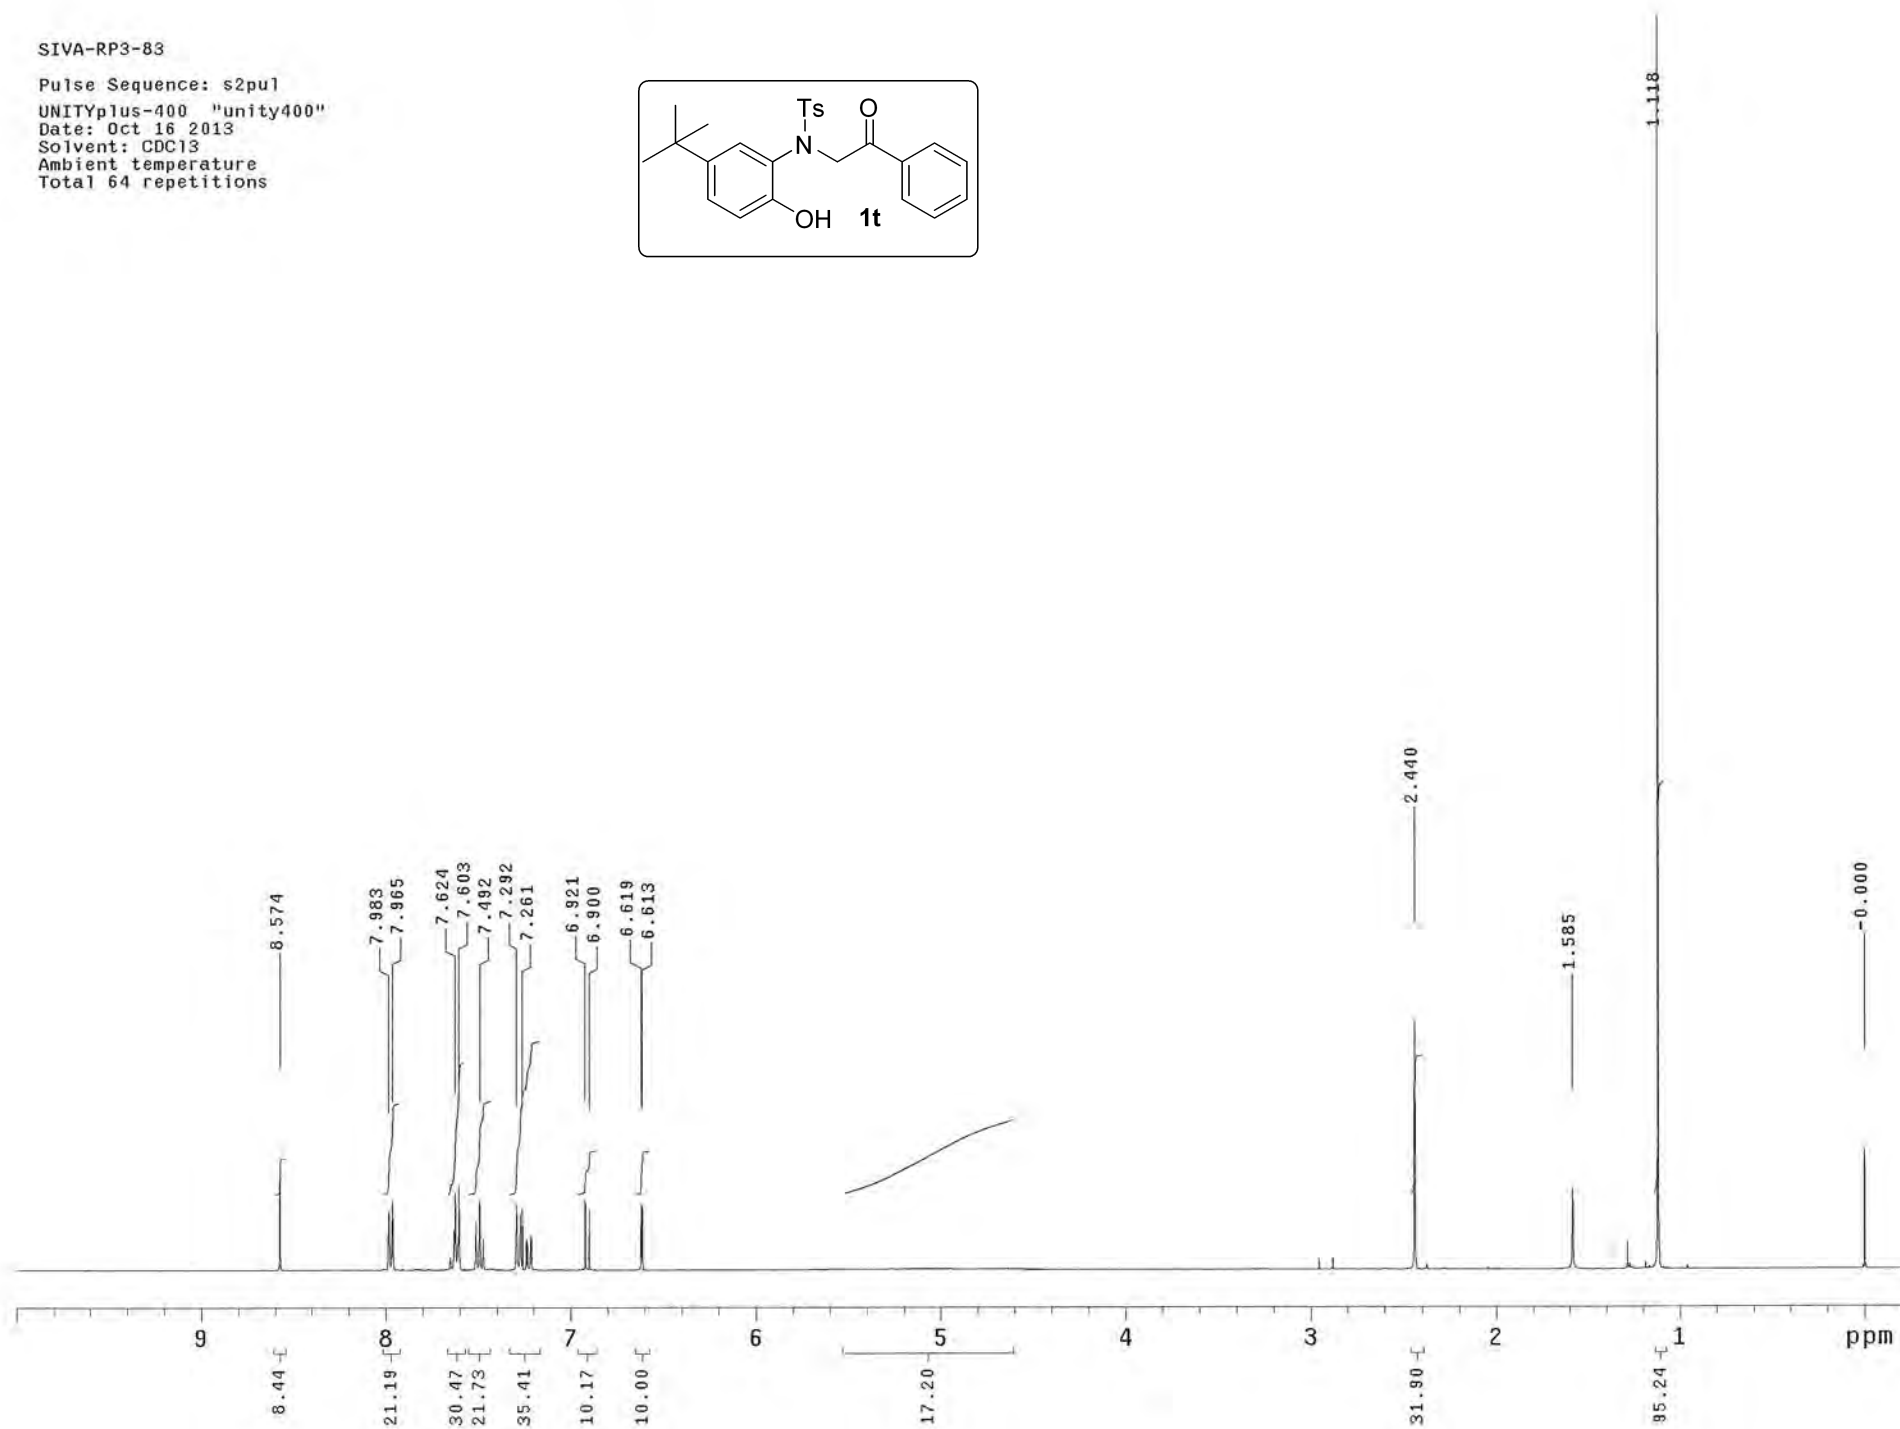

SIVA-RP3-83

Pulse Sequence: s2pu1

UNITYplus-400 "unity400"

Date: Oct 16 2013

Solvent: CDC13

Ambient temperature

Total 3680 repetitions

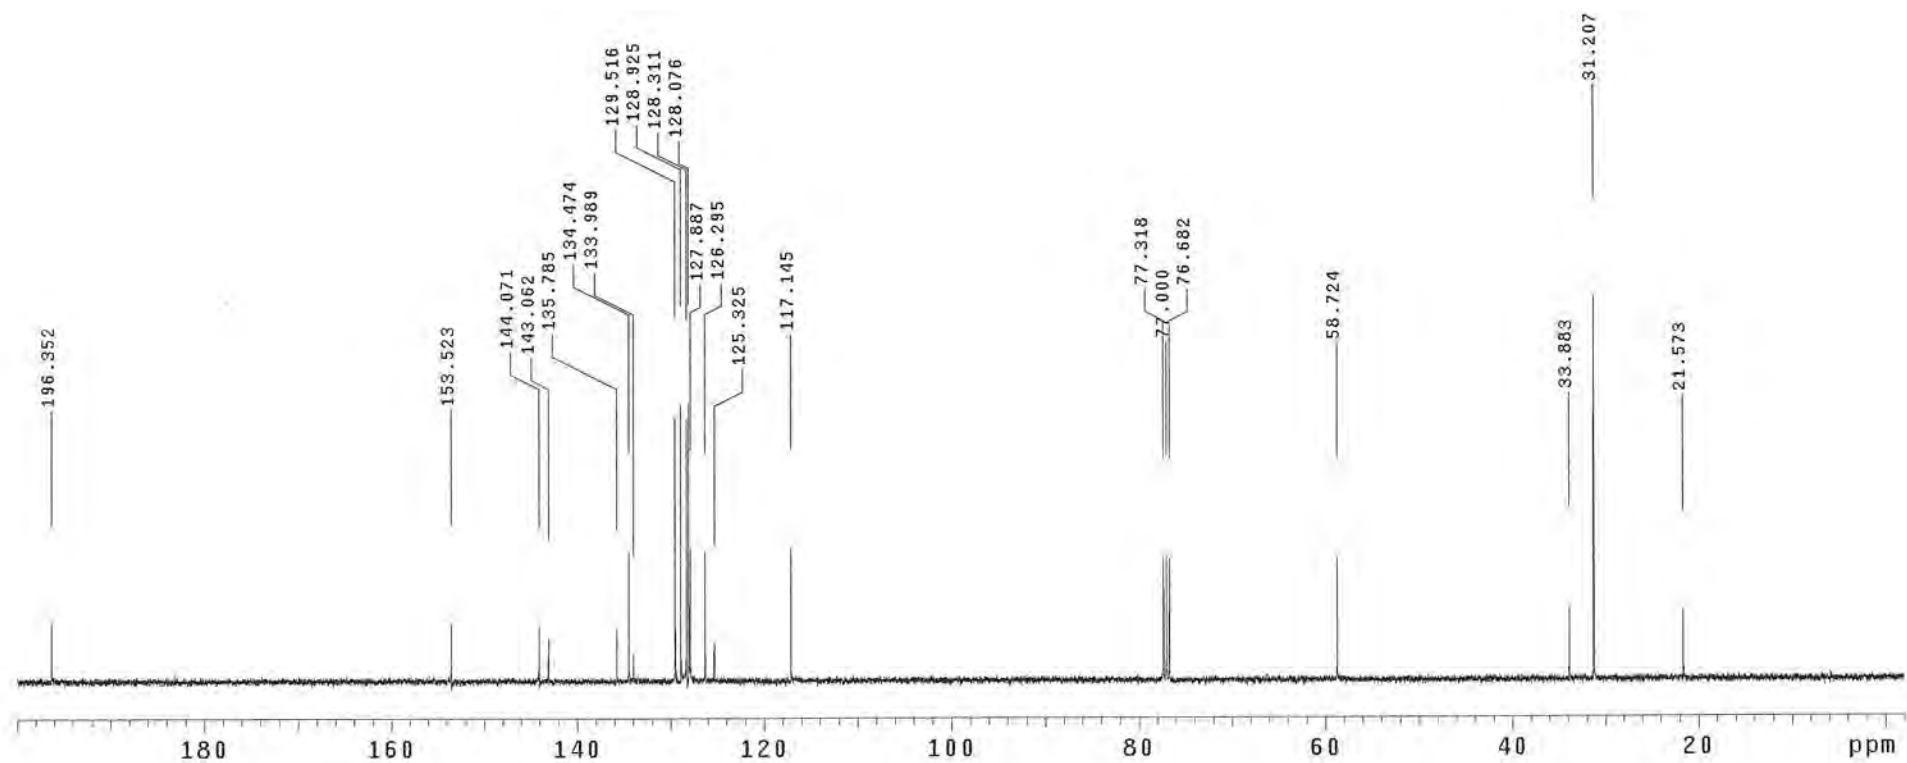

# FT-MS

## Analysis Info

Analysis Name D:\Data\4\SIVARP321\_000007.d  
Method broadband first signal  
Sample Name SIVA-RP3-21  
Comment ESI Positive

12/25/2013 3:25:28 PM

Instrument: FT-MS solariX

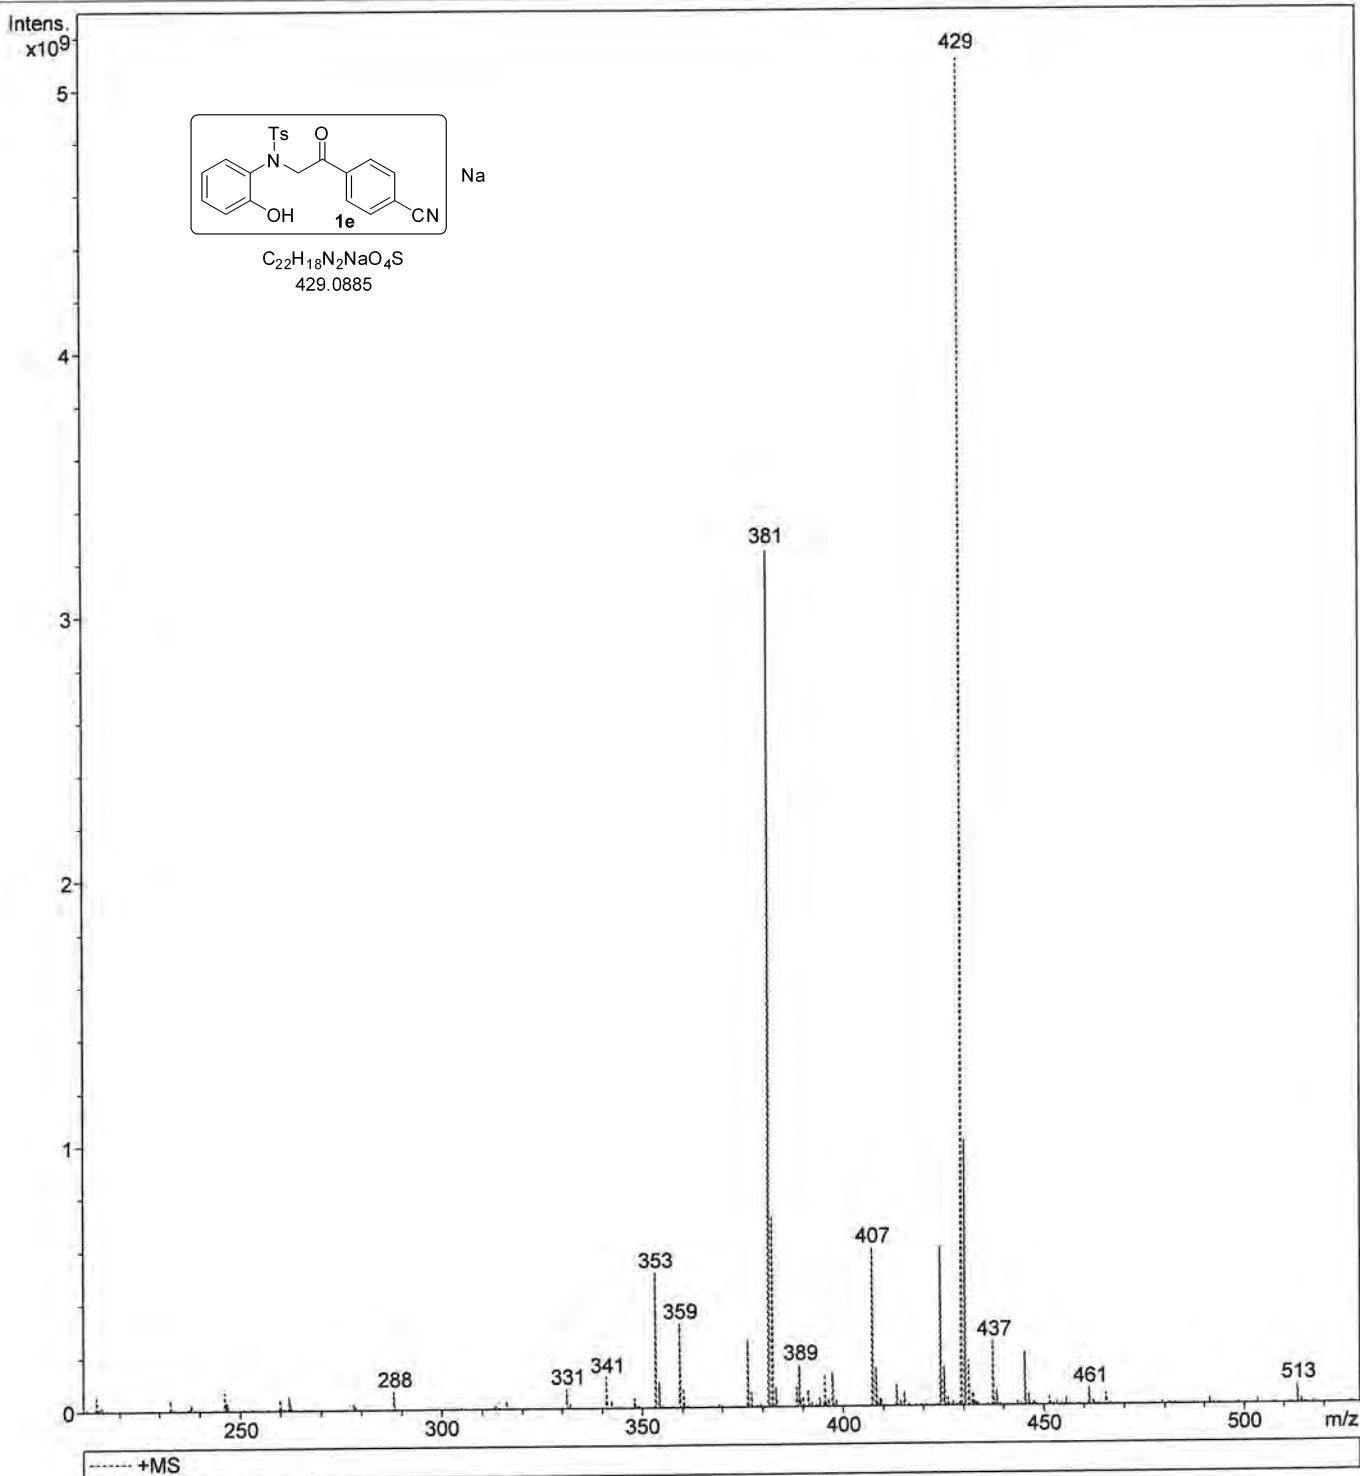



# Mass Spectrum SmartFormula Report

## Analysis Info

Analysis Name D:\Data\4\SIVARP321\_000009.d  
Method broadband first signal  
Sample Name SIVA-RP3-21  
Comment ESI Positive

12/25/2013 3:23:40 PM

Instrument: FT-MS solariX

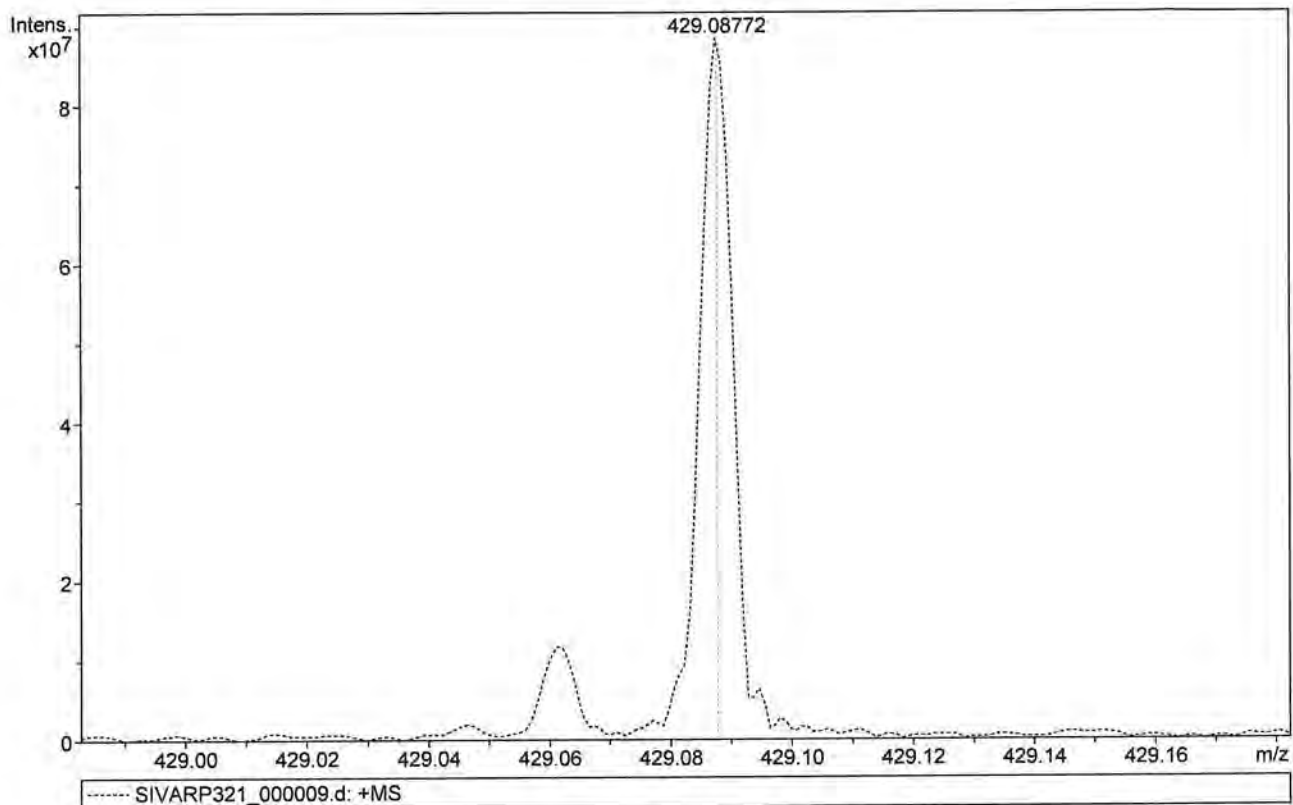

| Meas. m/z | # | Formula                                                           | Score  | m/z       | err [mDa] | err [ppm] | mSigma | rdb  | e <sup>-</sup> Conf | N-Rule |
|-----------|---|-------------------------------------------------------------------|--------|-----------|-----------|-----------|--------|------|---------------------|--------|
| 429.08772 | 1 | C <sub>22</sub> H <sub>18</sub> N <sub>2</sub> NaO <sub>4</sub> S | 100.00 | 429.08795 | 0.23      | 0.54      | 32.4   | 14.5 | even                | ok     |

# FT-MS

## Analysis Info

Analysis Name D:\Data\4\SIVARP343\_000001.d  
Method broadband first signal  
Sample Name SIVA-RP3-43  
Comment ESI Positive

12/25/2013 4:09:08 PM

Instrument: FT-MS solariX

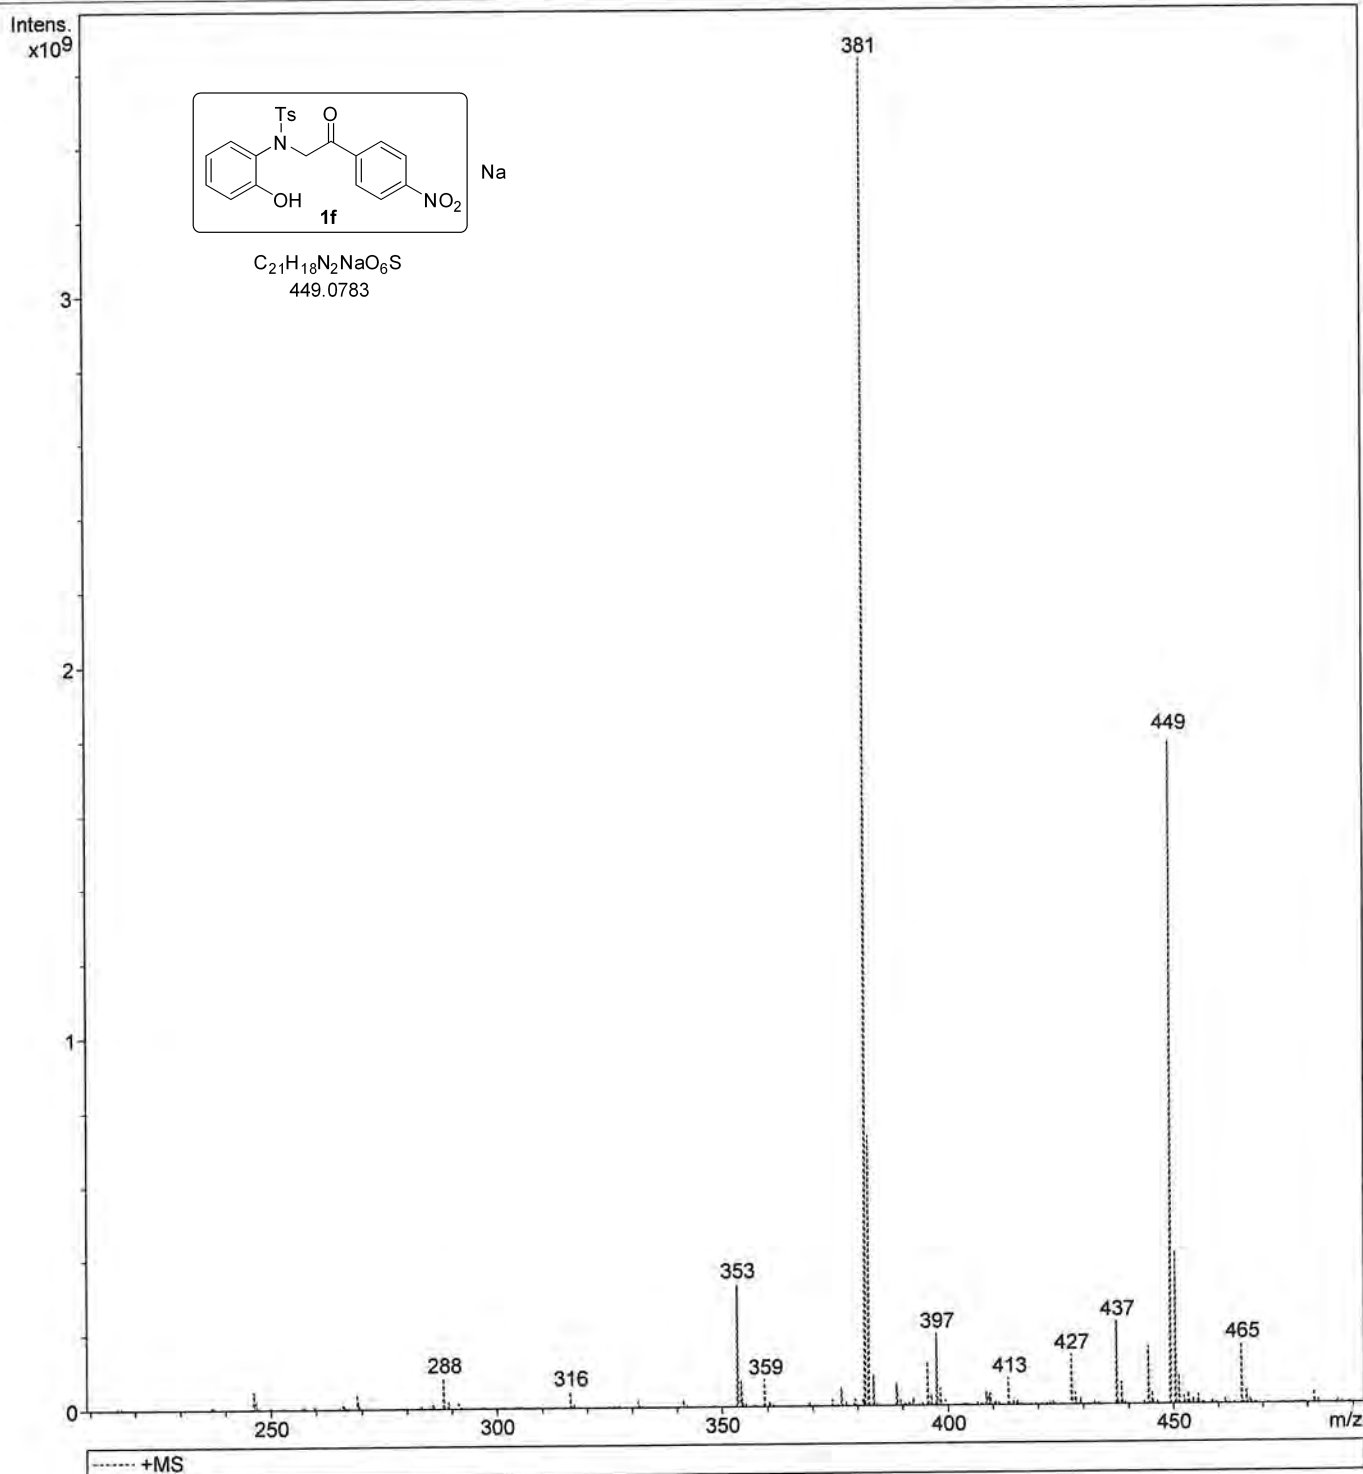

# Mass Spectrum SmartFormula Report

## Analysis Info

Analysis Name D:\Data\4\SIVARP343\_000006.d  
Method broadband first signal  
Sample Name SIVA-RP3-43  
Comment ESI Positive

12/25/2013 4:08:00 PM

Instrument: FT-MS solariX

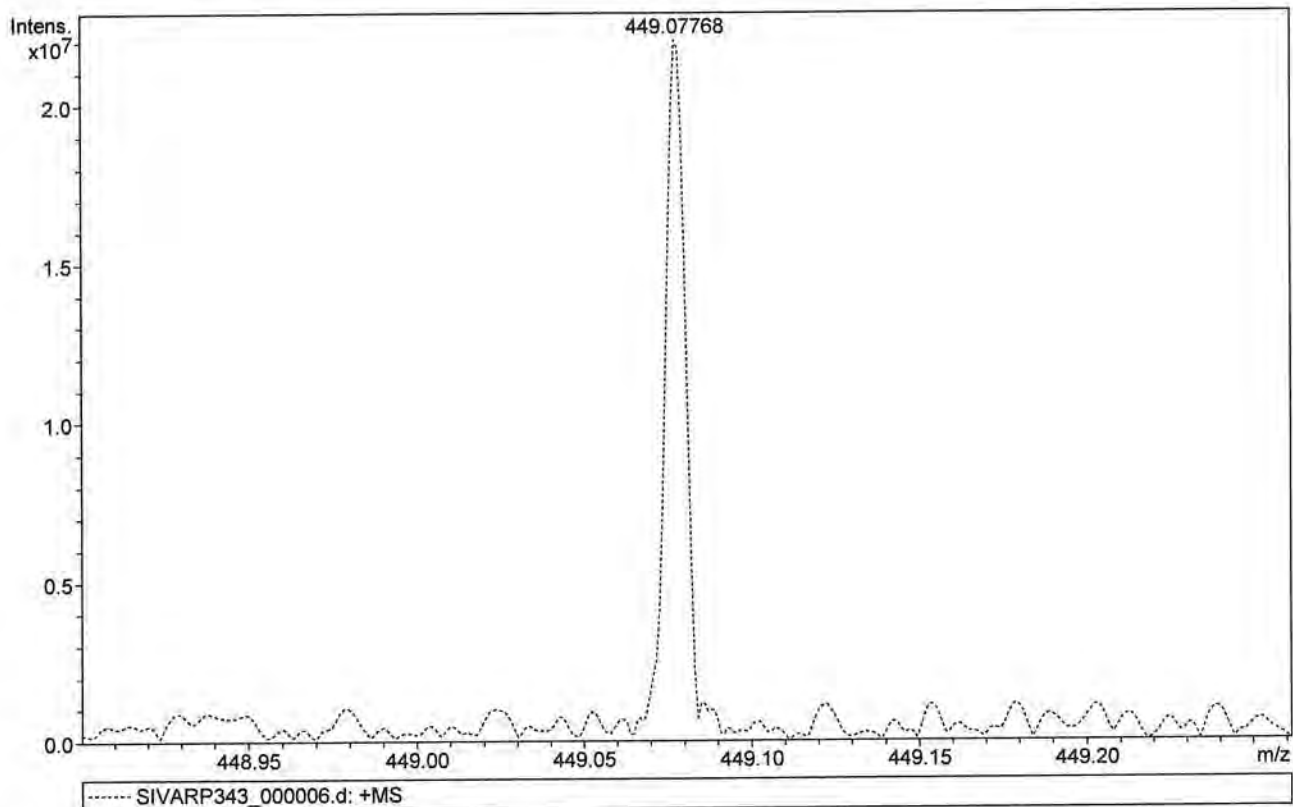

| Meas. m/z | # | Formula                                                           | Score  | m/z       | err [mDa] | err [ppm] | mSigma | rdb  | e <sup>-</sup> Conf | N-Rule |
|-----------|---|-------------------------------------------------------------------|--------|-----------|-----------|-----------|--------|------|---------------------|--------|
| 449.07768 | 1 | C <sub>21</sub> H <sub>18</sub> N <sub>2</sub> NaO <sub>6</sub> S | 100.00 | 449.07778 | 0.10      | 0.22      | 43.5   | 13.5 | even                | ok     |

# FT-MS

## Analysis Info

Analysis Name D:\Data\44\sivapr386S\_000001.d  
Method broadband first signal  
Sample Name SIVA-PR3-86S  
Comment ESI Positive

1/2/2014 3:30:38 PM

Instrument: FT-MS solarix

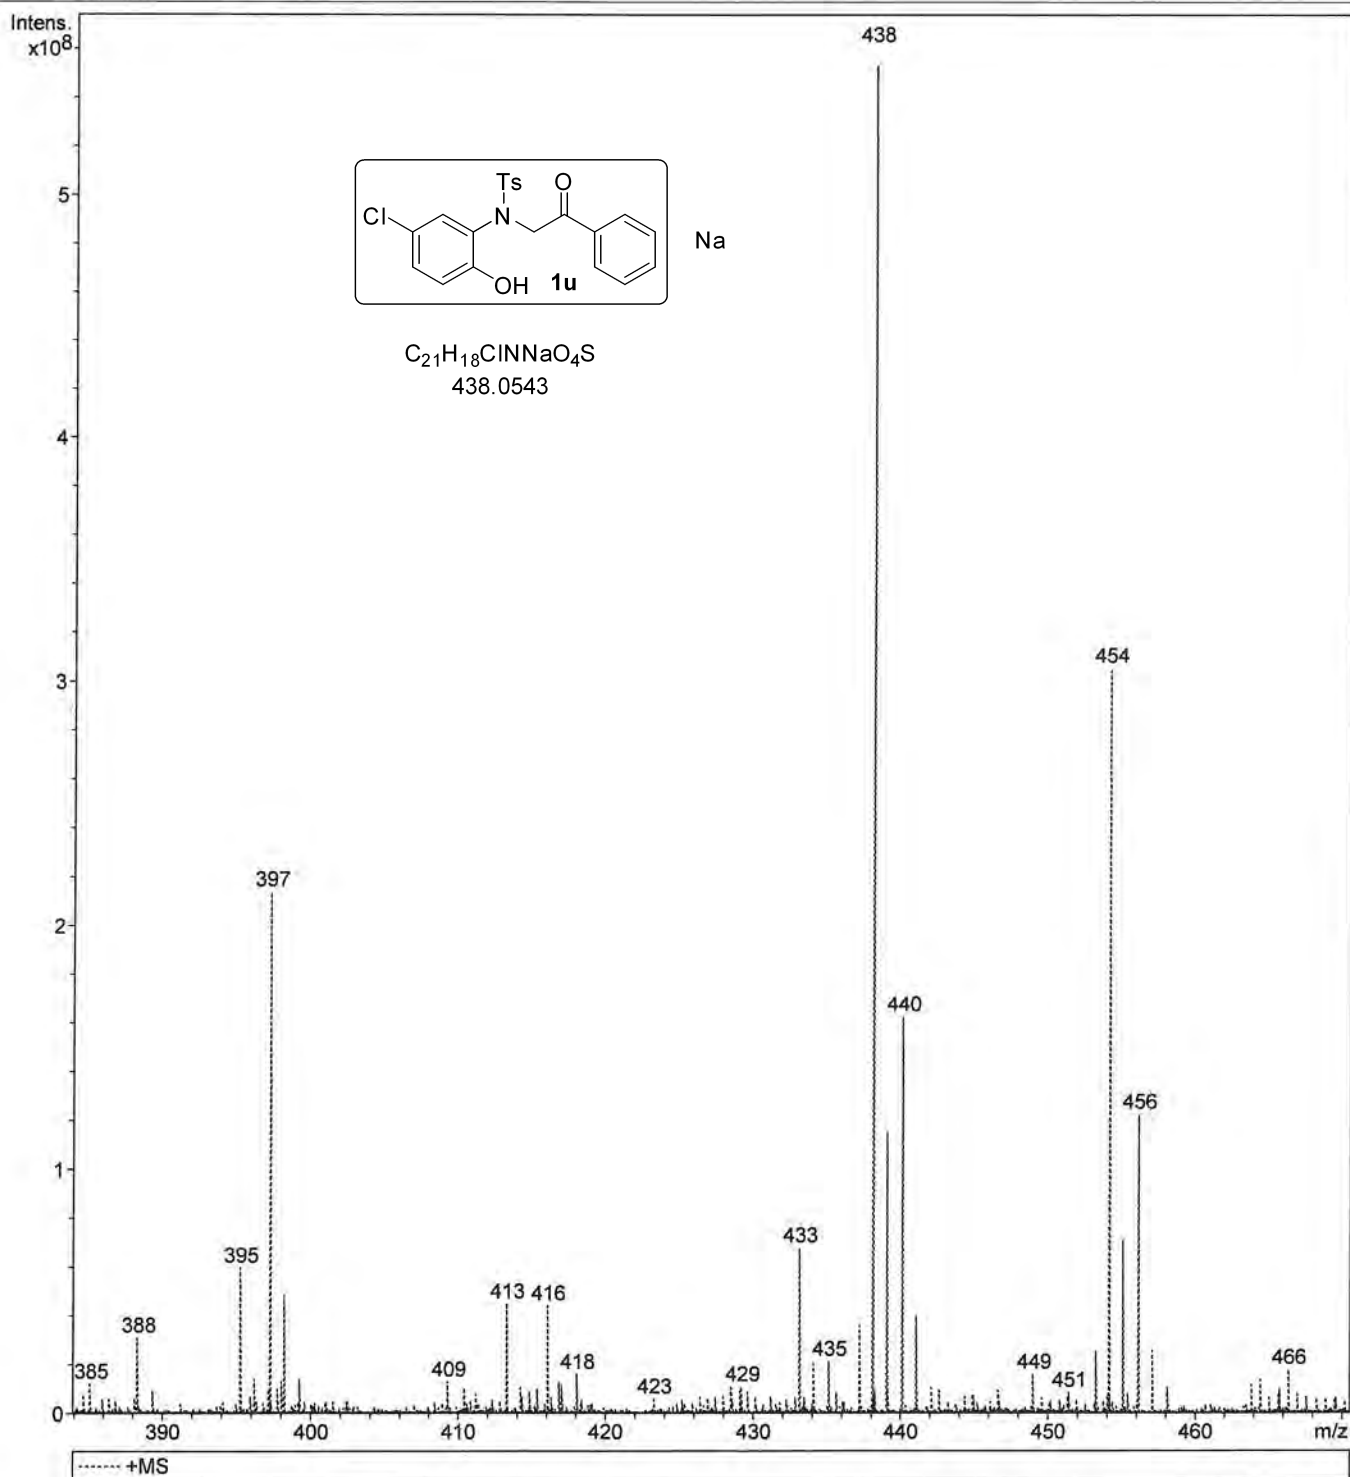

# Mass Spectrum SmartFormula Report

## Analysis Info

Analysis Name D:\Data\4\sivapr386S\_000005.d  
Method broadband first signal  
Sample Name SIVA-PR3-86S  
Comment ESI Positive

1/2/2014 3:39:23 PM

Instrument: FT-MS solariX

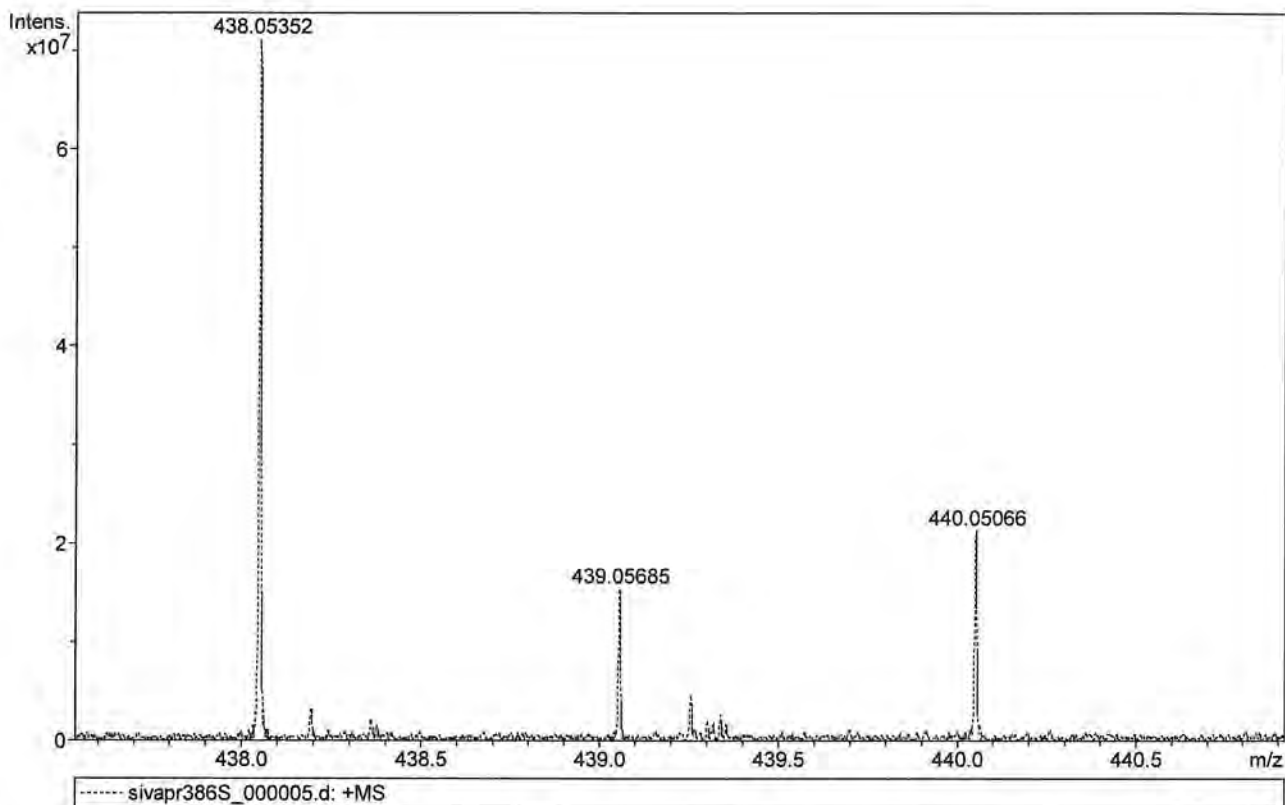

| Meas. m/z | # | Formula                 | Score  | m/z       | err [mDa] | err [ppm] | mSig ma | rdb  | e <sup>-</sup> Conf | N-R ule |
|-----------|---|-------------------------|--------|-----------|-----------|-----------|---------|------|---------------------|---------|
| 438.05352 | 1 | C 21 H 18 Cl N Na O 4 S | 100.00 | 438.05373 | 0.21      | 0.48      | 48.2    | 12.5 | even                | ok      |

## checkCIF/PLATON report

You have not supplied any structure factors. As a result the full set of tests cannot be run.

THIS REPORT IS FOR GUIDANCE ONLY. IF USED AS PART OF A REVIEW PROCEDURE FOR PUBLICATION, IT SHOULD NOT REPLACE THE EXPERTISE OF AN EXPERIENCED CRYSTALLOGRAPHIC REFEREE.

No syntax errors found.      CIF dictionary      Interpreting this report

### Datablock: sivapr357

---

Bond precision:    C-C = 0.0036 A                      Wavelength=0.71073

Cell:                      a=12.1035(4)              b=14.2703(6)              c=13.6727(6)  
                                    alpha=90                      beta=97.263(2)              gamma=90

Temperature:              296 K

|                | Calculated   | Reported     |
|----------------|--------------|--------------|
| Volume         | 2342.61(16)  | 2342.61(16)  |
| Space group    | P 2/c        | P 2/c        |
| Hall group     | -P 2yc       | ?            |
| Moiety formula | C15 H11 N O2 | C15 H11 N O2 |
| Sum formula    | C15 H11 N O2 | C15 H11 N O2 |
| Mr             | 237.25       | 237.25       |
| Dx,g cm-3      | 1.345        | 1.345        |
| Z              | 8            | 8            |
| Mu (mm-1)      | 0.090        | 0.090        |
| F000           | 992.0        | 992.0        |
| F000'          | 992.46       |              |
| h,k,lmax       | 15,17,17     | 15,17,17     |
| Nref           | 4818         | 4789         |
| Tmin,Tmax      | 0.958,0.966  | 0.958,0.966  |
| Tmin'          | 0.958        |              |

Correction method= MULTI-SCAN

Data completeness= 0.994                      Theta(max)= 26.400

R(reflections)= 0.0640( 3127)              wR2(reflections)= 0.2084( 4789)

S = 1.018                                      Npar= Npar = 327

---

The following ALERTS were generated. Each ALERT has the format  
**test-name\_ALERT\_alert-type\_alert-level.**  
Click on the hyperlinks for more details of the test.

---

Datablock sivapr357 - ellipsoid plot

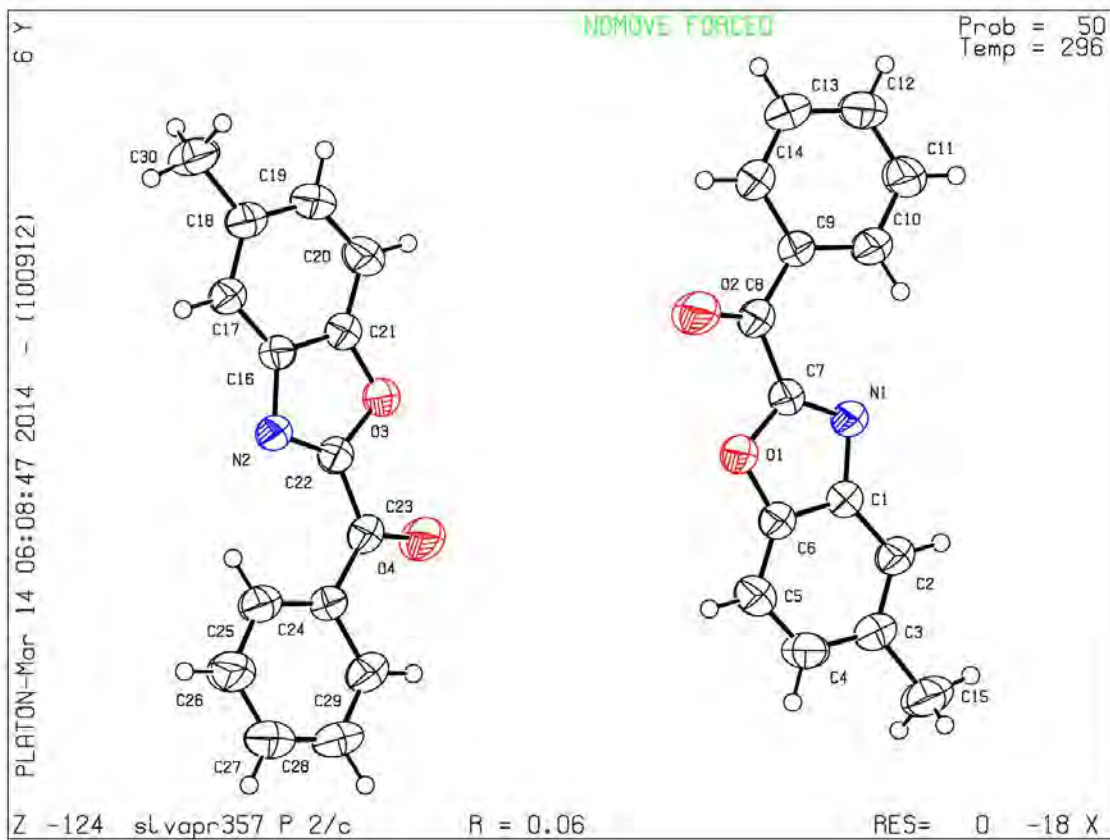

Supplement: c4cc02425g1.pdf [file c4cc02425g1.pdf]
